# Supplementary material for: Industry funding of patient organisations in the UK: a retrospective study of commercial determinants, funding concentration and disease prevalence
Source: PubMed Central journal article supplement (PMC10410975; doi:10.1136/bmjopen-2022-071138), 2023-06-27
Supplement: bmjopen-2022-071138.draft_revisions.pdf [file bmjopen-2022-071138.draft_revisions.pdf]

# BMJ Open

BMJ Open is committed to open peer review. As part of this commitment we make the peer review history of every article we publish publicly available.

When an article is published we post the peer reviewers' comments and the authors' responses online. We also post the versions of the paper that were used during peer review. These are the versions that the peer review comments apply to.

The versions of the paper that follow are the versions that were submitted during the peer review process. They are not the versions of record or the final published versions. They should not be cited or distributed as the published version of this manuscript.

BMJ Open is an open access journal and the full, final, typeset and author-corrected version of record of the manuscript is available on our site with no access controls, subscription charges or pay-per-view fees (<http://bmjopen.bmj.com>).

If you have any questions on BMJ Open's open peer review process please email [info.bmjopen@bmj.com](mailto:info.bmjopen@bmj.com)

# BMJ Open

## Industry funding of patient organisations in the United Kingdom: A retrospective study of commercial determinants, funding concentration and disease prevalence

|                               |                                                                                                                                                                                                            |
|-------------------------------|------------------------------------------------------------------------------------------------------------------------------------------------------------------------------------------------------------|
| Journal:                      | <i>BMJ Open</i>                                                                                                                                                                                            |
| Manuscript ID                 | bmjopen-2022-071138                                                                                                                                                                                        |
| Article Type:                 | Original research                                                                                                                                                                                          |
| Date Submitted by the Author: | 20-Dec-2022                                                                                                                                                                                                |
| Complete List of Authors:     | Gentilini, Arianna; The London School of Economics and Political Science, Department of Health Policy<br>Parvanova, Iva; The London School of Economics and Political Science, Department of Health Policy |
| Keywords:                     | Health policy < HEALTH SERVICES ADMINISTRATION & MANAGEMENT, PUBLIC HEALTH, Health Equity                                                                                                                  |
|                               |                                                                                                                                                                                                            |

SCHOLARONE™  
Manuscripts

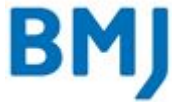

I, the Submitting Author has the right to grant and does grant on behalf of all authors of the Work (as defined in the below author licence), an exclusive licence and/or a non-exclusive licence for contributions from authors who are: i) UK Crown employees; ii) where BMJ has agreed a CC-BY licence shall apply, and/or iii) in accordance with the terms applicable for US Federal Government officers or employees acting as part of their official duties; on a worldwide, perpetual, irrevocable, royalty-free basis to BMJ Publishing Group Ltd ("BMJ") its licensees and where the relevant Journal is co-owned by BMJ to the co-owners of the Journal, to publish the Work in this journal and any other BMJ products and to exploit all rights, as set out in our [licence](#).

The Submitting Author accepts and understands that any supply made under these terms is made by BMJ to the Submitting Author unless you are acting as an employee on behalf of your employer or a postgraduate student of an affiliated institution which is paying any applicable article publishing charge ("APC") for Open Access articles. Where the Submitting Author wishes to make the Work available on an Open Access basis (and intends to pay the relevant APC), the terms of reuse of such Open Access shall be governed by a Creative Commons licence – details of these licences and which [Creative Commons](#) licence will apply to this Work are set out in our licence referred to above.

Other than as permitted in any relevant BMJ Author's Self Archiving Policies, I confirm this Work has not been accepted for publication elsewhere, is not being considered for publication elsewhere and does not duplicate material already published. I confirm all authors consent to publication of this Work and authorise the granting of this licence.

1  
2  
3  
4 1 **Industry funding of patient organisations in the United Kingdom: A**  
5 2 **retrospective study of commercial determinants, funding concentration and**  
6 3 **disease prevalence**  
7  
8  
9

10 4  
11 5 Arianna Gentilini and Iva Parvanova

12 6 Department of Health Policy, London School of Economics and Political Science, London,  
13 7 UK  
14  
15  
16  
17 8  
18  
19 9

20  
21 10 **Corresponding author**  
22

23 11 Arianna Gentilini

24  
25 12 Department of Health Policy  
26 13 Cowdray House, COW.4.09  
27 14 London School of Economics  
28 15 Houghton street  
29 16 London WC2A 2AE  
30 17 England  
31 18 Email: [a.gentilini@lse.ac.uk](mailto:a.gentilini@lse.ac.uk)  
32  
33  
34  
35  
36  
37  
38  
39  
40  
41  
42  
43  
44  
45  
46  
47  
48  
49  
50  
51  
52  
53  
54  
55  
56  
57  
58  
59  
60

# 1 Industry funding of patient organisations in the United Kingdom: A 2 retrospective study of commercial determinants, funding concentration and 3 disease prevalence

## 4 Abstract

5 **Objectives** – To assess the relationship between UK-based patient organisation funding and  
6 companies' commercial interests in rare and non-rare diseases from 2018 to 2020.

7 **Design** – Retrospective analysis of the value and volume of payments from pharmaceutical  
8 companies to patient organisations in the UK matched with data on the conditions supported  
9 by patient organisations and drugs in companies' approved portfolios and research and  
10 development pipelines.

11 **Setting** – UK.

12 **Participants** – 60 pharmaceutical companies making financial transfers to 483 UK-based  
13 patient organisations.

14 **Main outcome measures** – Alignment between the commercial interests of pharmaceutical  
15 companies and the disease area focus of patient organisations; difference in the volume and  
16 value of transfers to patient organisations broken down by prevalence of conditions; industry  
17 funding concentration, measured as the number of companies funding each patient  
18 organisations, the share of overall industry funding coming from each contributing company  
19 and the share of industry funding of each organisation comprised by the single highest transfers.

20 **Results** – 3,155 transfers were made by 60 companies to 429 patient organisations. Almost all  
21 funds (97%) from pharmaceutical companies were directed to patient organisations that are  
22 aligned with companies' approved drug portfolios and research and development pipelines.  
23 Despite rare diseases affecting less than 5% of the UK population, 25% of all transfers were  
24 directed to patient organisations which target such conditions. Patient organisations focusing  
25 on rare diseases relied on transfers from fewer companies (*p-value* = 0.008) compared to  
26 organisations focusing on non-rare diseases.

27 **Conclusions** – Companies predominantly funded patient organisations operating in therapeutic  
28 areas relevant to companies' portfolio or drug development pipeline. Patient organisations  
29 focusing on rare diseases received more funding relative to the number of patients affected by  
30 these conditions and relied more heavily on transfers from fewer companies compared to  
31 organisations targeting non-rare diseases. Increased independence of patient organisations  
32 could help avoiding conflicts of interest.

## Strengths and limitations of this study

- We develop a methodology to determine the concordance between commercial interests of pharmaceutical companies and disease areas supported by patient organisations
- We present a comparative analysis of industry funding to patient organisations depending on the prevalence of the disease(s) they support.
- Our analysis focuses on a recent time period which might differ from historical trends.
- Financial transfers from pharmaceutical companies to patient organisations might be underreported. However, underreporting is expected to impact the absolute value of financial transfers rather than the relative difference.

For peer review only

## 1 Introduction

2 Patient organisations, which represent and support the needs of patients, play an important role  
3 in the development, regulatory review, and adoption of new drugs. During research and  
4 development, patient organisations effectively advocate for resources to be directed to  
5 conditions where unmet need is highest.<sup>1 2</sup> Patient organisations support research design and  
6 planning, helping to identify patient-relevant study endpoints.<sup>2</sup> Patient organisations also  
7 represent patient views and preferences at the time of regulatory review and health technology  
8 assessment of new drugs.<sup>3 4</sup> For example, during technology appraisals conducted by the  
9 National Institute for Health and Care Excellence (NICE), which makes funding  
10 recommendations for the English National Health Service (NHS), patients, and organisations  
11 representing the interests of patients, provide testimonies of their first-hand experiences on how  
12 the disease affects them and those around them.<sup>5</sup> Finally, when drugs are launched, patient  
13 organisations contribute to dissemination of research results to patient community and  
14 clinicians, and offer support and information on therapies available.<sup>2 6</sup>

15 Given the role of patient organisations across all stages of drug development, approval and  
16 access, it is vital to understand their financial ties with pharmaceutical companies. Previous  
17 studies documented the large number and high value of payments from pharmaceutical  
18 companies to patient organisations,<sup>6-9</sup> the uneven distribution between and within therapeutic  
19 areas,<sup>7 9</sup> the concentration of payments coming from a small number of pharmaceutical firms.<sup>6-  
20 11</sup>

21 What remains unknown is the alignment between the commercial interests of pharmaceutical  
22 companies and patient organisations' activities. Previous literature has shown that industry  
23 prioritises commercially attractive conditions.<sup>7</sup> Moreover, research in different settings  
24 suggested that having a drug marketed for a certain disease is associated with an increase in  
25 industry funding to patient organisations operating in the same area.<sup>9</sup> However, the question of  
26 whether companies fund patient organisations operating in therapeutic areas relevant to  
27 companies' approved drug portfolios and research and development pipelines remains  
28 unanswered.

29 Another gap in the literature relates to the dynamics between the pharmaceutical industry and  
30 patient organisations supporting rare vs. non-rare conditions. Patient organisations focusing on  
31 rare conditions serve different purposes than those focusing on non-rare diseases. First, patient  
32 organisations focusing on rare diseases are mostly made up of patients, their families and  
33 carers.<sup>12</sup> This makes them uniquely placed to share first-hand experiences that helps steering  
34 research and approval decisions.<sup>13 14</sup> For example, in appraisals for extremely rare diseases,  
35 NICE places particular importance on patients' testimonies, as they help with defining target  
36 populations and determining treatment benefits.<sup>15</sup> Second, patient organisations targeting rare  
37 diseases support recruitment and enrolment of patients in clinical trials.<sup>13</sup> Third, such  
38 organisations have been instrumental in advocating for scientific support and economic  
39 incentives to stimulate innovation in rare diseases, which ultimately led to the enactment of  
40 legislation in multiple settings, such as the EU Regulation on Orphan Medicinal Products.<sup>16 17</sup>

41 We evaluated the concordance between the commercial interests of pharmaceutical companies  
42 and patient organisations' activities. We also sought to characterise the financial relations

1  
2  
3 1 between the pharmaceutical industry and patient organisations focusing on rare versus non-rare  
4 2 diseases in the UK using publicly available data on transfers of value between 2018 and 2020.  
5 3 We analysed the volume, value of transfers to patient organisations according to their disease  
6 4 area of interest and its rarity. Lastly, we examined the concentration of industry funding,  
7 5 namely how many companies funded each patient organisation and the extent to which  
8 6 organisations might have been reliant on funding from a single company.  
9  
10  
11  
12  
13  
14  
15  
16  
17  
18  
19  
20  
21  
22  
23  
24  
25  
26  
27  
28  
29  
30  
31  
32  
33  
34  
35  
36  
37  
38  
39  
40  
41  
42  
43  
44  
45  
46  
47  
48  
49  
50  
51  
52  
53  
54  
55  
56  
57  
58  
59  
60

For peer review only



## 1 **Methods**

### 2 **Data on industry payments**

3 We used the Disclosure UK patient organisation gateway (in January 2022) to retrieve data on  
4 transfers from the pharmaceutical industry to patient organisations from 2018 to 2020.<sup>18</sup> The  
5 gateway was launched in 2020 and is a collection of hyperlinks to companies' disclosure of  
6 transfers to patient organisations. Disclosing transfers to patient organisations is a requirement  
7 of Clause 29 of the Association of British Pharmaceutical Industry (ABPI) Code of Practice.<sup>19</sup>  
8 Companies that sign up to abide by the ABPI Code accept the jurisdiction of the Prescription  
9 Medicines Code of Practice Authority (code regulator), which extends beyond those who are  
10 ABPI members. This requirement therefore affects virtually all pharmaceutical companies  
11 operating in the UK. Companies might be sanctioned by the ABPI if they do not disclose their  
12 transfers.<sup>19</sup> We screened the websites of all pharmaceutical companies listed in the Disclosure  
13 UK database to ensure all transfers were captured. If transfers were not disclosed in Disclosure  
14 UK nor in the company's website, we assumed the company was did not make any transfers to  
15 patient organisations in a given year.

16 One investigator (AG) extracted transfer disclosures from the companies' websites. These  
17 comprised the name of the patient organisation, the year when the transfer was made, the reason  
18 for the transfer and its value in the currency reported by the disclosing company. All transfers  
19 were first adjusted for inflation using the ONS Consumer Price Index.<sup>20</sup> When reported in  
20 different currencies, such as United States Dollars (USD), Swiss Franc (CHF), Swedish Krona  
21 (SEK), Norwegian Krone (NKK) and Danish Krone (DKK), the value of the transfer was  
22 converted to Great British Pounds (GBP), using the ONS historical yearly conversion rates.<sup>21</sup>  
23 <sup>22</sup> We reported all transfers in 2020 GBP. Two in-kind transfers with a monetary value of zero  
24 were excluded from the analysis.

### 25 **Data on patient organisations**

26 We retrieved data on patient organisations from their websites. Details on the therapeutic area  
27 they advocated for – proxied by International Classification of Diseases Version 11 (ICD-11)  
28 codes – and whether the condition(s) was rare or non-rare were also extracted. Conditions were  
29 considered rare if they appeared in the Orphanet database of rare diseases.<sup>24</sup> Orphanet is a  
30 unique platform and repository of data on rare diseases and orphan drugs. Patient organisations  
31 that were not disease specific, such as hospital charities, carers organisations and hospices, or  
32 that did not match the European Federation of Pharmaceutical Industries and Associations  
33 (EFPIA) definition of what constitutes a patient organisation were excluded from the analysis.  
34 We chose the EFPIA's definition for the following reasons. First, other commonly used  
35 definitions, such as the one from the European Medicines Agency (EMA), refer to the structure  
36 of patient organisations' governing bodies, which have to consist of over 50% patients.<sup>25</sup>  
37 Considering the high number of patient organisations included in our analysis, this requirement  
38 was challenging – if not impossible – to verify. Second, EFPIA's definition indicates what the  
39 pharmaceutical industry considers to be a patient organisation. Therefore, it helped us minimize  
40 selection bias issues as it includes a wide range of organisations. We excluded excluding 181  
41 transfers to patient organisations that did not match EFPIA's definition. Sub-group analyses on  
42 excluded organisations can be found in the Supplemental Material.

### 1 **Determining commercial interests**

2 We assessed whether – and the extent to which – a pharmaceutical company holds an interest  
3 in the disease supported by a patient organisation. We adapted the definition of ‘interest’  
4 provided by NICE <sup>26</sup>. An interest is when there is, or could be perceived to be, an opportunity  
5 for a pharmaceutical company to benefit in the disease area where the patient organisation  
6 operates. This could include cases where the pharmaceutical company has a drug developed or  
7 in development for a condition targeted by the patient organisation, or where a drug in the  
8 company’s portfolio or pipeline is restricted to a specific population affected by the disease  
9 supported by the patient organisation.

10 To establish whether an interest existed or not, we first classified the conditions targeted by  
11 patient organisations to ICD-11 codes using the online ICD-11 database.<sup>27</sup> ICD-11 codes are  
12 mutually exclusive, exhaustive and are arranged as a single hierarchical tree, from level one  
13 (most general e.g., *neoplasms*) to five (most specific, e.g. *plasma cell myeloma*). This means  
14 that specific diseases are nested within broader classifications.

15 We then searched companies’ annual reports, websites and the ClinicalTrials.gov registry to  
16 determine whether each company had an interest in the condition targeted by the patient  
17 organisation receiving the transfer. Figure 1 schematically illustrates the approach taken to  
18 understand whether – and the degree to which – a company has an interest in the conditions  
19 (*definitely yes, probably yes, no*). For example, if *Company X* declares in its annual report  
20 having a drug in development for multiple myeloma and made a transfer to *Blood Cancer UK*,  
21 this would be coded as *probably yes*, as the company has a product in its pipeline or portfolio  
22 nested within a broader class of conditions targeted by the patient organisation. Conversely,  
23 should *Company X* have made a transfer to *Myeloma UK*, this would have been coded as  
24 *definitely yes*, as there is perfect alignment between the condition targeted by the patient  
25 organisation and by *Company X*’s drug. Cases in which a company’s interest in a certain  
26 condition could not be identified were coded as *no*. These, however, were due to limitations in  
27 data availability and therefore did not indicate that there was no company interest. Data on  
28 pharmaceutical companies’ portfolio and pipeline were retrieved from their latest annual  
29 reports, company websites and ClinicalTrials.gov.<sup>23</sup>

30 One investigator (AG) initially coded all data, while the other (IP) blindly re-coded a 30%  
31 random sample of transfers to validate the data collection process and minimise the risk of  
32 reporting errors. Any disagreement was discussed until consensus was reached.

### 33 **Analysis of industry funding concentration**

34 We assessed the concentration of industry funding received by patient organisations. In  
35 particular, we calculated (1) the number of companies funding each patient organisations, (2)  
36 the share of overall industry funding coming from each contributing company and (3) the share  
37 of industry funding of each organisation comprised by the single highest transfers.

38 The Supplemental Material provides further details on the data collection and how the  
39 outcomes were constructed. Descriptive statistics and tests, such as ranges and K-sample tests,  
40 were presented in the analysis. These statistics were preferred over the mean in light of the

1  
2  
3 1 skewed distribution of the data analysed. All analyses and data visualisations were performed  
4 2 using Stata 17 and RStudio (*ggplot2* package), respectively.  
5  
6

7 3 **Patient and public involvement**

8 4 Patients were not involved in this study as our analyses focused on patient organisations as  
9 5 institutional actors rather than single patients with specific conditions. We plan to disseminate  
10 6 key findings from our analysis to patients and members of the public.  
11  
12  
13  
14  
15  
16  
17  
18  
19  
20  
21  
22  
23  
24  
25  
26  
27  
28  
29  
30  
31  
32  
33  
34  
35  
36  
37  
38  
39  
40  
41  
42  
43  
44  
45  
46  
47  
48  
49  
50  
51  
52  
53  
54  
55  
56  
57  
58  
59  
60

For peer review only

## Results

Between 2018 and 2020, 60 companies made 3,155 transfers to 429 patient organisations in the study period, amounting to £42 million. The value of the transfers rose significantly over time, from £10.3 million in 2018 to £16.8 million in 2020.

Overall, *diseases of the nervous system* (£8.2 million) was the most funded therapeutic area over time, followed by *neoplasms* (£7.9 million) and *endocrine, nutritional or metabolic diseases* (£5.3 million). About 50% of the transfers made to organisations targeting *diseases of the nervous system* were made in 2020 alone. Sanofi, Novartis, Pfizer, UCB and Janssen were the top five funders over the study period (Figure 2). These companies contributed to between 37% and 44% of all transfers, decreasing over time.

Table 1 in the Supplemental Material summarises the number and value of transfers to patient organisations.

### Companies' interest in financial transfers to patient organisations

Between 2018-2020, 96% of the transfers were directed to patient organisations that were judged to be aligned with their portfolio and pipeline. Only 4% of transfers were made to organisations that focused on conditions that could not be linked to a product in the funder's portfolio or pipeline. Table 1 shows the volume and value of transfers, broken down by the company's interest variable and whether patient organisations targeted a rare or non-rare disease. Transfers to patient organisations targeting a disease for which the company has a product developed or in development (*definitely yes*) made up around 55% regardless of the rarity of the condition targeted.

The monetary value of transfers coded as *definitely yes* accounted for 69% of the overall transfer value for patient organisations targeting rare diseases versus 63% for organisations focusing on non-rare conditions. When transfers coded as *probably yes* were included, this share increased to 97% for both patient organisations focusing on rare and non-rare diseases.

1 **Table 1. Volume and value of transfers by company interests**

| Patient organisation type | Company's interest | Volume; n(%) |           |           |             | Value: £(%)      |                  |                  |                   |
|---------------------------|--------------------|--------------|-----------|-----------|-------------|------------------|------------------|------------------|-------------------|
|                           |                    | 2018         | 2019      | 2020      | Overall     | 2018             | 2019             | 2020             | Overall           |
| Rare                      | Definitely yes     | 79 (53%)     | 125 (58%) | 136 (54%) | 340 (54%)   | £1,602,340 (69%) | £2,372,533 (72%) | £2,750,425 (66%) | £6,725,300 (69%)  |
|                           | Probably yes       | 59 (40%)     | 79 (38%)  | 124 (45%) | 262 (41%)   | £635,393 (27%)   | £781,688 (24%)   | £1,296,449 (31%) | £2,713,531 (28%)  |
|                           | No                 | 10 (7%)      | 11 (5%)   | 13 (5%)   | 34 (5%)     | £91,282 (4%)     | £126,779 (4%)    | £134,015 (3%)    | £352,078 (4%)     |
| Non-rare                  | Definitely yes     | 408 (56%)    | 425 (54%) | 443 (55%) | 1,276 (55%) | £5,350,194 (67%) | £5,921,218 (65%) | £7,850,393 (62%) | £19,121,806 (62%) |
|                           | Probably yes       | 304 (42%)    | 339 (43%) | 334 (41%) | 977 (42%)   | £2,409,093 (31%) | £3,032,911 (33%) | £4,385,282 (35%) | £9,827,287 (35%)  |
|                           | No                 | 17 (2%)      | 24 (3%)   | 30 (4%)   | 71 (3%)     | £231,784 (3%)    | £155,331 (2%)    | £334,352 (3%)    | £721,468 (3%)     |

2 Notes: *Definitely yes* indicates transfers directed to patient organisations that operated in a disease area (ICD-11 level 4 or higher) for which the company has a product in its  
3 portfolio or pipeline. *Probably yes* indicates directed to patient organisations that operated in a disease area (ICD-11 level 3 or lower) for which the company has a product in  
4 its portfolio or pipeline. *No* refers to directed to patient organisations that operated in a disease area for which no link could be found to the company's portfolio or pipeline.  
5 The higher the ICD-11, the more specific the condition. For example, if the ICD-11 level 4 is *Plasma cell neoplasms*, level 2 would be *Neoplasms of hematopoietic or lymphoid*  
6 *tissues*. Further details on how this variable was constructed can be found in the Supplemental Material.

### 1 **Industry funding of patient organisations focusing on rare vs. non-rare conditions**

2 Of the £42 million in transfers from industry to patient organisations, £9.8 million (23%;  
3 n=635) were directed to organisations focusing on rare diseases while £29.7 million (71%;  
4 n=2,323) to organisations supporting non-rare conditions. The remaining 6% were directed to  
5 non-disease-specific patient organisations, which were excluded from the main analysis.

6 From 2018 to 2020, the transfer to patient organisations targeting rare diseases increased more  
7 compared to those focusing on more prevalent conditions (80% vs 57%). Median transfers  
8 received by patient organisations were significantly different ( $p<0.001$ ) depending on the rarity  
9 of the disease they focused on, with rare patient organisations receiving higher transfers.

10 Among the top five recipients overall in 2018 and 2019, two focused on rare diseases (Myeloma  
11 UK and the Cystic Fibrosis Trust). In 2020 no organisation targeting rare conditions appeared  
12 in the top five recipients. Figure 3 shows therapeutic areas in order from most to least funded,  
13 broken down by rarity of disease targeted. In the case of organisations focusing on rare  
14 diseases, *neoplasms* and *endocrine, nutritional or metabolic disease* received most funds across  
15 years. Together, the top three most funded disease areas represented more than half of overall  
16 funding. When looking at the conditions that attracted most funding, multiple sclerosis was  
17 first (£4.1 million), followed by diabetes (£2.4 million) and epilepsy (£1.7 million). Cystic  
18 fibrosis and multiple myeloma were the only rare diseases that were among the top ten most  
19 funded conditions overall, attracting £1.3 and £1.2 million, respectively (Table 2).

1 **Table 2. Number of funding companies, top funder and highest transfers for the top five receiving patient organisations**

| <u>Patient organisations</u>                                      | <u>Number of funding companies</u> | <u>Top funder</u> | <u>Overall funding</u> | <u>Highest transfer</u> | <u>Share highest transfer/ overall funding</u> | <u>Top funder interest</u> |
|-------------------------------------------------------------------|------------------------------------|-------------------|------------------------|-------------------------|------------------------------------------------|----------------------------|
| <b>Rare</b>                                                       |                                    |                   |                        |                         |                                                |                            |
| Cystic Fibrosis Trust                                             | 1                                  | Chiesi            | £ 1,305,512            | £ 1,305,512             | 100%                                           | <i>Definitely yes</i>      |
| Myeloma UK                                                        | 8                                  | Celgene           | £ 1,243,519            | £ 425,495               | 34%                                            | <i>Definitely yes</i>      |
| Genetic Alliance UK                                               | 15                                 | Alexion           | £ 613,006              | £ 153,002               | 25%                                            | <i>Definitely yes</i>      |
| International Patient Organisation for Primary Immunodeficiencies | 5                                  | Shire             | £ 556,357              | £ 222,100               | 40%                                            | <i>Definitely yes</i>      |
| Society for Mucopolysaccharide Diseases                           | 6                                  | Sanofi            | £ 651,097              | £ 293,095               | 45%                                            | <i>Definitely yes</i>      |
| <b>Non-rare</b>                                                   |                                    |                   |                        |                         |                                                |                            |
| Diabetes UK                                                       | 9                                  | Novo Nordisk      | £ 2,389,423            | £ 1,071,507             | 45%                                            | <i>Definitely yes</i>      |
| Epilepsy Society                                                  | 2                                  | UCB               | £ 1,539,749            | £ 1,534,236             | 100%                                           | <i>Definitely yes</i>      |
| Shift.MS                                                          | 5                                  | Sanofi            | £ 1,315,328            | £ 341,019               | 26%                                            | <i>Definitely yes</i>      |
| Multiple Sclerosis International Federation                       | 6                                  | Sanofi            | £ 1,279,214            | £ 482,082               | 38%                                            | <i>Definitely yes</i>      |
| Asthma + Lung UK                                                  | 11                                 | Seqirus           | £ 994,842              | £ 160,369               | 16%                                            | <i>Definitely yes</i>      |

### 1 **Industry funding concentration**

2 On average, each patient organisation received transfers from approximately two companies,  
3 with 1.97 (SD:1.74) and 2.21 (SD:1.91) companies funding patient organisations targeting rare  
4 and non-rare diseases, respectively. However this difference was not statistically significant ( $\chi^2$   
5 = 0.197, *p-value* = 0.657).

6 In our sample, the median transfer of a company to a patient organisation comprised 33% of  
7 the overall industry transfers per organisation (IQR: 0.112-1). When looking at patient  
8 organisations focusing on rare diseases, the median company contribution was as high as 42%  
9 (IQR: 0.145-1) versus 31% (IQR: 0.116-0.997) for non-rare conditions ( $\chi^2$  = 7.141, *p-value*  
10 = 0.008).

11 Finally, the share of industry funding comprised by the single highest transfer per organisation  
12 amounted to an average of 73% (SD: 0.29) for the entire sample, ranging from a minimum of  
13 10% to a maximum of 100%. This percentage slightly decreased annually over the study  
14 period. The highest value transfer in the case of patient organisations targeting rare diseases  
15 made up a larger share of the overall industry funding (median: 86%, IQR: 0.527-1), despite  
16 not significant, compared to those focusing on more prevalent conditions (median: 79%, IQR:  
17 0.428-1).



## 1 Discussion

2 In this study, we evaluated the financial links between the pharmaceutical industry and patient  
3 organisations in the UK between 2018 and 2020. This is the first study to document the almost-  
4 perfect concordance of pharmaceutical company interests and patient organisation funding.  
5 Almost all industry transfers during our study period – in terms of both volume (96%) and  
6 value (97%) – were to patient organisations aligned with pharmaceutical companies' portfolios  
7 and pipelines. Approximately a quarter of industry funding to patient organisations from 2018  
8 to 2020 was directed towards organisations focusing on rare diseases (£9.8 million / £42  
9 million). Finally, we found that patient organisations targeting rare diseases relied on transfers  
10 from fewer companies but of higher value compared to organisations focusing on non-rare  
11 diseases.

12 The almost-perfect concordance between industry interests and patient organisation activities  
13 likely reflect the commercial attractiveness of conditions targeted by pharmaceutical  
14 companies.<sup>28-30</sup> Such close alignment between the interests between companies and patient  
15 organisations might undermine the credibility of patient organisations as perceived by the  
16 general public and might raise questions about patient organisations' inputs in regulatory and  
17 health technology appraisals. A recent study found that during NICE appraisal meetings fewer  
18 than 25% of all relevant financial ties between patient organisations and pharmaceutical  
19 companies were disclosed.<sup>31</sup>

20 Our findings make an important contribution to the existing body of literature on industry  
21 funding of patient organisations. Ozieranski et al found that industry donated over £57 million  
22 to UK patient organisations from 2012 to 2016, an average of £11.5 million per year.<sup>7</sup> The  
23 authors also observed that payments were concentrated in commercially attractive therapeutic  
24 areas, with organisations focusing on cancer receiving more than 36% of overall payments.<sup>7</sup>  
25 However, the study did not examine whether companies were more likely to fund organisations  
26 that target diseases for which they have already developed or are currently developing products.  
27 Another earlier study examined transfers to Swedish patient organisations and found an  
28 association between drug commercialisation and industry funding.<sup>9</sup> The authors did not take  
29 into account products in the companies' pipelines nor drugs that might had not yet launched in  
30 Sweden. Considering that patient organisations have an important role not only in the post-  
31 commercialisation phase but also in the R&D and approval stages, this might have led to an  
32 underestimate of the companies' interest in some conditions. We therefore developed a robust,  
33 hierarchical matching algorithm to determine whether transfers from companies were directed  
34 at organisations that were aligned with their portfolios and pipelines.

35 Patient organisations focusing on rare diseases can drive both supply of and demand for  
36 medicinal products due to their research, advocacy and education role.<sup>2 17</sup> As a result of their  
37 close ties with patients, these organisations have the credibility and power to educate patient  
38 communities, advocate for access to available therapies and raise awareness on the unmet need  
39 of certain conditions.<sup>2 13 32</sup> Although a large share of both the value and number of transfers  
40 were directed to patient organisations focusing on rare diseases, most funds targeted  
41 commercially attractive rare conditions, such as multiple myeloma and cystic fibrosis, where  
42 the unmet need is relatively low compared to other rare conditions. These are diseases that have

1 relatively high prevalence and for which 10 and 29 treatments, respectively, are currently  
2 approved for use in Europe.<sup>24 33</sup> This poses the risk of widening already existing health  
3 inequities, where severe and debilitating rare conditions that affect a small number of patients  
4 do not receive the resources they need and have to rely on limited public grants.<sup>34</sup>

5 Finally, our analysis showed that patient organisations focusing on rare diseases are funded by  
6 very few companies, relying on a single transfer for over 80% of their industry-reported  
7 income. Despite the share of industry contributions among the overall patient organisation's  
8 income remains unknown, this increases the risk of pursuing the company's commercial  
9 interests rather than objectively representing a patient body.<sup>11</sup>

10 These findings have important implications for policy and practice. To minimise conflicts of  
11 interests, patient organisations should not accept payments from companies whose products  
12 they have endorsed a year before and after this endorsement.<sup>31</sup> One way of avoiding potential  
13 conflicts of interest is through increased transparency. Despite considerable progress on this  
14 front, especially in terms of reporting the monetary value of industry payments, there are still  
15 gaps in reporting.<sup>35</sup> Furthermore, financial independence of patient organisation is fundamental  
16 for making sure that patients' interest is at the forefront of the organisations' agenda. In the  
17 long term, policymakers should make sure that patient organisations receive adequate public  
18 funding regardless of whether they focus on conditions that are profitable for the industry. Such  
19 public funding is particularly important for patient organisations supporting rare diseases, as  
20 relatively few companies have financial links with patient organisations focusing on rare  
21 diseases, potentially creating high reliance on few high-value transfers.

22 This study had limitations. First, companies may have underreported their financial transfers  
23 to patient organisations.<sup>36</sup> However, as underreporting is expected to affect all patient  
24 organisations equally, we do not expect this to affect the difference across disease areas or  
25 between rare and non-rare diseases investigated in our analysis. Second, in our assessment of  
26 company interests, we made a conservative assumption that only patient organisations which  
27 target relatively narrow conditions were eligible to be coded as *definitely yes*. Despite this  
28 assumption, we concluded that more than half of transfers were in therapeutic areas in which  
29 companies had a clear interest. Finally, our analysis focused on a recent time period (2018-  
30 2020). While previous publications show similar trends,<sup>7 9</sup> conferring robustness to the  
31 findings, whether these trends hold over time and their generalisability to other periods is  
32 unclear.

33 There are several avenues which can be explored further to build on this analysis. While some  
34 of the previous literature on the topic has focused on the financial dependency of patient  
35 organisations' budgets from pharmaceutical funding,<sup>10</sup> whether this differs depending on the  
36 rarity of the disease targeted has not been explored. Due to the small number of patients  
37 affected by rare conditions, patient organisations that target such conditions may be less well-  
38 equipped to finance their activities via charitable events and may rely more heavily on  
39 contributions from pharmaceutical companies. Lastly, while our analysis did not evaluate the  
40 effect of Covid-19 on the financial dynamics between pharmaceutical companies and patient  
41 organisations, we expect that the pandemic had a substantial effect on the type, value and

1  
2  
3  
4  
5  
6  
7  
8  
9  
10  
11  
12  
13  
14  
15  
16  
17  
18  
19  
20  
21  
22  
23  
24  
25  
26  
27  
28  
29  
30  
31  
32  
33  
34  
35  
36  
37  
38  
39  
40  
41  
42  
43  
44  
45  
46  
47  
48  
49  
50  
51  
52  
53  
54  
55  
56  
57  
58  
59  
60

1 distribution of transfers. Future research should examine the impact of Covid-19 on industry  
2 funding of patient organisations.

3 **Conclusions**

4 Almost all industry funding of patient organisations between 2018 and 2020 was in areas that  
5 were aligned with companies' approved drug portfolios and research and development  
6 pipelines. Pharmaceutical companies spent a larger amount on patient organisations focusing  
7 on rare diseases and that such organisations relied on a small of companies for their funding.

For peer review only

1  
2  
3  
4  
5  
6  
7  
8  
9  
10  
11  
12  
13  
14  
15  
16  
17  
18  
19  
20  
21  
22  
23  
24  
25  
26  
27  
28  
29  
30  
31  
32  
33  
34  
35  
36  
37  
38  
39  
40  
41  
42  
43  
44  
45  
46  
47  
48  
49  
50  
51  
52  
53  
54  
55  
56  
57  
58  
59  
60

1 **Acknowledgements:** We thank Dr Huseyin Naci and Dr Olivier Wouters, both from the  
2 Department of Health Policy at the London School of Economics and Political Science, for  
3 providing comments on earlier drafts of this paper. We also acknowledge Dr Mylene Lagarde  
4 and Dr Panos Kanavos for the support provided when finalising the manuscript.

5 **Contributors:** AG developed a preliminary version of the study and developed it further with  
6 IP. AG collected the data. AG and IP did the analysis, wrote and reviewed the manuscript. Both  
7 authors had full access to all of the data (including statistical reports and tables) in the study  
8 and can take responsibility for the integrity of the data and the accuracy of the data analysis.  
9 The corresponding author attests that all listed authors meet authorship criteria and that no  
10 others meeting the criteria have been omitted. AG is the guarantor.

11 **Funding:** This research received no specific grant from any funding agency in the public,  
12 commercial or not-for-profit sectors. AG is funded by the ESRC for her doctoral research  
13 (Project reference: 2480077) and is employed by Imperial College London. IP is funded by the  
14 ESRC for her doctoral research (Project reference: 2311285) and is employed by Imperial  
15 College London.

16 **Competing interest statement:** All authors have completed the Unified Competing Interest  
17 form (available on request from the corresponding author) and declare: no support from any  
18 organisation for the submitted work; no financial relationships with any organisations that  
19 might have an interest in the submitted work in the previous three years, no other relationships  
20 or activities that could appear to have influenced the submitted work.

21 **Ethical approval:** This study does not involve human participants and ethical approval was  
22 not required.

23 **Data sharing:** A dataset of all publicly available data used in the study is available from the  
24 corresponding author at a.gentilini@lse.ac.uk.

25 **Transparency declaration:** The lead author affirms that the manuscript is an honest, accurate,  
26 and transparent account of the study being reported; that no important aspects of the study have  
27 been omitted; and that any discrepancies from the study as planned (and, if relevant, registered)  
28 have been explained.

29 The Corresponding Author has the right to grant on behalf of all authors and does grant on  
30 behalf of all authors, an exclusive licence (or non-exclusive for government employees) on a  
31 worldwide basis to the BMJ Publishing Group Ltd to permit this article (if accepted) to be  
32 published in BMJ editions and any other BMJ PGL products and sublicences such use and  
33 exploit all subsidiary rights, as set out in our licence.

## References

1. Polich GR. Rare disease patient groups as clinical researchers. *Drug Discovery Today* 2012;17(3):167-72. doi: <https://doi.org/10.1016/j.drudis.2011.09.020>
2. Geissler J, Ryll B, di Priolo SL, et al. Improving Patient Involvement in Medicines Research and Development::A Practical Roadmap. *Therapeutic Innovation & Regulatory Science* 2017;51(5):612-19. doi: 10.1177/2168479017706405
3. MHRA. Patient Involvement Strategy 2021-25: Medicines and Healthcare products Regulatory Agency 2020.
4. MHRA. Putting patients first: A new era for our agency. Delivery Plan 2021-2023: Medicines and Healthcare products Regulatory Agency 2020.
5. NICE. Public Involvement Programme - Overview of technology appraisals: A factsheet for patient and carer organisations: National Institute for Health and Care Excellence, 2014
6. Fabbri A, Parker L, Colombo C, et al. Industry funding of patient and health consumer organisations: systematic review with meta-analysis. *BMJ* 2020;368:l6925. doi: 10.1136/bmj.l6925
7. Ozieranski P, Rickard E, Mulinari, Shai. Exposing drug industry funding of UK patient organisations. *BMJ* 2019;365:l1806. doi: 10.1136/bmj.l1806
8. Rose SL, Highland J, Karafa MT, et al. Patient Advocacy Organizations, Industry Funding, and Conflicts of Interest. *JAMA Intern Med* 2017;177(3):344-50. doi: 10.1001/jamainternmed.2016.8443
9. Mulinari S, Vilhelmsson A, Rickard E, et al. Five years of pharmaceutical industry funding of patient organisations in Sweden: Cross-sectional study of companies, patient organisations and drugs. *PLoS One* 2020;15(6):e0235021. doi: 10.1371/journal.pone.0235021 [published Online First: 20200624]
10. Ozieranski P, Pitter JG, Rickard E, et al. A 'patient-industry complex'? Investigating the financial dependency of UK patient organisations on drug company funding. *Sociol Health Illn* 2022;44(1):188-210. doi: 10.1111/1467-9566.13409 [published Online First: 20211207]
11. Rose SL. Patient advocacy organizations: institutional conflicts of interest, trust, and trustworthiness. 2014(1748-720X (Electronic))
12. Halley MC. From "Ought" to "Is": Surfacing Values in Patient and Family Advocacy in Rare Diseases. 2021(1536-0075 (Electronic))
13. Aymé S, Kole A, Groft S. Empowerment of patients: lessons from the rare diseases community. *Lancet* 2008;371(9629):2048-51. doi: 10.1016/s0140-6736(08)60875-2
14. Dunkle M, Pines W, Saltonstall PL. Advocacy Groups and Their Role in Rare Diseases Research. In: Posada de la Paz M, Groft SC, eds. *Rare Diseases Epidemiology*. Dordrecht: Springer Netherlands 2010:515-25.
15. Gentic Alliance. NICE and patient involvement in Highly Specialised Technologies 2018 [Available from: [https://geneticalliance.org.uk/wp-content/uploads/2019/01/How-to-work-with-NICE\\_webinar.pdf](https://geneticalliance.org.uk/wp-content/uploads/2019/01/How-to-work-with-NICE_webinar.pdf).
16. European Commission. Regulation (EC) No 141/2000 of the European Parliament and of the Council of 16 December 1999 on Orphan Medicinal Products, 2000.
17. Mavris M, Le Cam Y. Involvement of patient organisations in research and development of orphan drugs for rare diseases in europe. 2012(1661-8769 (Print))
18. Disclosure UK. ABPI Patient Organisations database 2021 [Available from: <https://search.disclosureuk.org.uk/>.
19. PMCPA. ABPI Code of Practice 2021 [Available from: <https://www.pmcpa.org.uk/the-code/2021-interactive-abpi-code-of-practice/>.
20. ONS. Consumer price inflation time series: Office for National Statistics; 2022 [Available from: <https://www.ons.gov.uk/economy/inflationandpriceindices/timeseries/l55o/mm23>.
21. HMRC. HMRC yearly average and spot rates: HM Revenue and Customs; [Available from: <https://www.gov.uk/government/publications/exchange-rates-for-customs-and-vat-yearly>.
22. HMRC. HMRC yearly average and spot rates: HM Revenue and Customs; 2022 [Available from: <https://www.gov.uk/government/publications/exchange-rates-for-customs-and-vat-yearly>.

- 1  
2  
3 1 23. NIH U.S. National Library of Medicine. ClinicalTrials.gov [Available from:  
4 2 <https://clinicaltrials.gov/2022>.  
5 3 24. Orphanet. The portal for rare diseases and orphan drugs 2022 [Available from:  
6 4 [https://www.orpha.net/consor/cgi-bin/Disease\\_Search\\_Simple.php?lng=EN](https://www.orpha.net/consor/cgi-bin/Disease_Search_Simple.php?lng=EN).  
7 5 25. European Medicines Agency. Criteria to be fulfilled by patient, consumer and healthcare  
8 6 professional organisations involved in European Medicines Agency (EMA) activities 2018  
9 7 [Available from: [https://www.ema.europa.eu/en/documents/regulatory-procedural-](https://www.ema.europa.eu/en/documents/regulatory-procedural-guideline/criteria-be-fulfilled-patient-consumer-healthcare-professional-organisations-involved-european_en.pdf)  
10 8 [guideline/criteria-be-fulfilled-patient-consumer-healthcare-professional-organisations-](https://www.ema.europa.eu/en/documents/regulatory-procedural-guideline/criteria-be-fulfilled-patient-consumer-healthcare-professional-organisations-involved-european_en.pdf)  
11 9 [involved-european\\_en.pdf](https://www.ema.europa.eu/en/documents/regulatory-procedural-guideline/criteria-be-fulfilled-patient-consumer-healthcare-professional-organisations-involved-european_en.pdf).  
12  
13 10 26. NICE. Policy on declaring and managing interests for NICE advisory committees, 2018.  
14 11 27. WHO. ICD-11 for Mortality and Morbidity Statistics 2022 [Available from:  
15 12 <https://icd.who.int/browse11/l-m/en#/http://id.who.int/icd/entity/465177735?view=G0>.  
16 13 28. Roos JC, Hyry HI, Fau - Cox TM, Cox TM. Orphan drug pricing may warrant a competition law  
17 14 investigation. (1756-1833 (Electronic))  
18 15 29. Hughes DA, Poletti-Hughes J. Profitability and Market Value of Orphan Drug Companies: A  
19 16 Retrospective, Propensity-Matched Case-Control Study. 2016(1932-6203 (Electronic))  
20 17 30. Luzzatto L, Hyry HI, Schieppati A, et al. Outrageous prices of orphan drugs: a call for  
21 18 collaboration. 2018(1474-547X (Electronic))  
22 19 31. Mandeville KL, Barker R, Packham A, et al. Financial interests of patient organisations  
23 20 contributing to technology assessment at England's National Institute for Health and Care  
24 21 Excellence: policy review. *BMJ* 2019;364:k5300. doi: 10.1136/bmj.k5300  
25 22 32. Bedlington N, Geissler J, Houyez F, et al. Role of Patient Organisations. In: Facey KM, Ploug  
26 23 Hansen H, Single ANV, eds. Patient Involvement in Health Technology Assessment.  
27 24 Singapore: Springer Singapore 2017:401-10.  
28 25 33. European Medicines Agency. European public assessment reports (EPAR), 2022.  
29 26 34. Baggott R, Jones K. The Big Society in an age of austerity: threats and opportunities for Health  
30 27 Consumer and Patients' Organizations in England. 2015(1369-7625 (Electronic))  
31 28 35. Lexchin J. Association between commercial funding of Canadian patient groups and their views  
32 29 about funding of medicines: An observational study. *PLOS ONE* 2019;14(2):e0212399. doi:  
33 30 10.1371/journal.pone.0212399  
34 31 36. Ozieranski P, Csanádi M, Rickard E, et al. Under-reported relationship: a comparative study of  
35 32 pharmaceutical industry and patient organisation payment disclosures in the UK (2012–2016).  
36 33 *BMJ Open* 2020;10(9):e037351. doi: 10.1136/bmjopen-2020-037351  
37  
38  
39 34  
40  
41 35  
42  
43  
44  
45  
46  
47  
48  
49  
50  
51  
52  
53  
54  
55  
56  
57  
58  
59  
60

1  
2  
3  
4  
5  
6  
7  
8  
9  
10  
11  
12  
13  
14  
15  
16  
17  
18  
19  
20  
21  
22  
23  
24  
25  
26  
27  
28  
29  
30  
31  
32  
33  
34  
35  
36  
37  
38  
39  
40  
41  
42  
43  
44  
45  
46  
47  
48  
49  
50  
51  
52  
53  
54  
55  
56  
57  
58  
59  
60

1 **Figure legend**

2 **Figure 1.** Hierarchical algorithm to determine company interests in patient organisation funding

3 Note: An interest is when there is, or could be perceived to be, an opportunity for a pharmaceutical  
4 company to benefit in the disease area where the patient organisation operates.

5 **Figure 2.** Cumulative value of transfers by receiving patient organisation and funding company from  
6 2018-2020

7 **Figure 3.** Cumulative value of transfers by patient organisation type and therapeutic area  
8 from 2018-2020

For peer review only

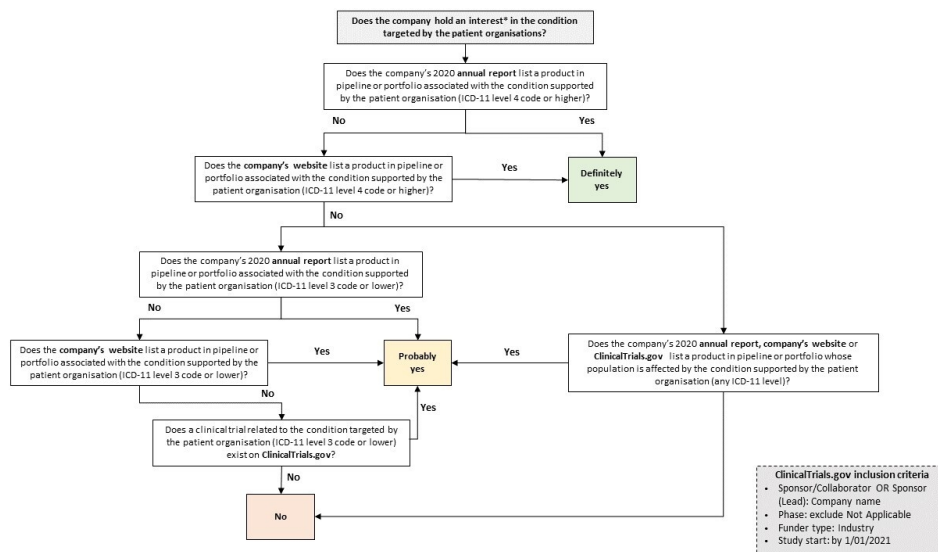

figure 1

108x60mm (300 x 300 DPI)



1  
2  
3  
4  
5  
6  
7  
8  
9  
10  
11  
12  
13  
14  
15  
16  
17  
18  
19  
20  
21  
22  
23  
24  
25  
26  
27  
28  
29  
30  
31  
32  
33  
34  
35  
36  
37  
38  
39  
40  
41  
42  
43  
44  
45  
46  
47  
48  
49  
50  
51  
52  
53  
54  
55  
56  
57  
58  
59  
60

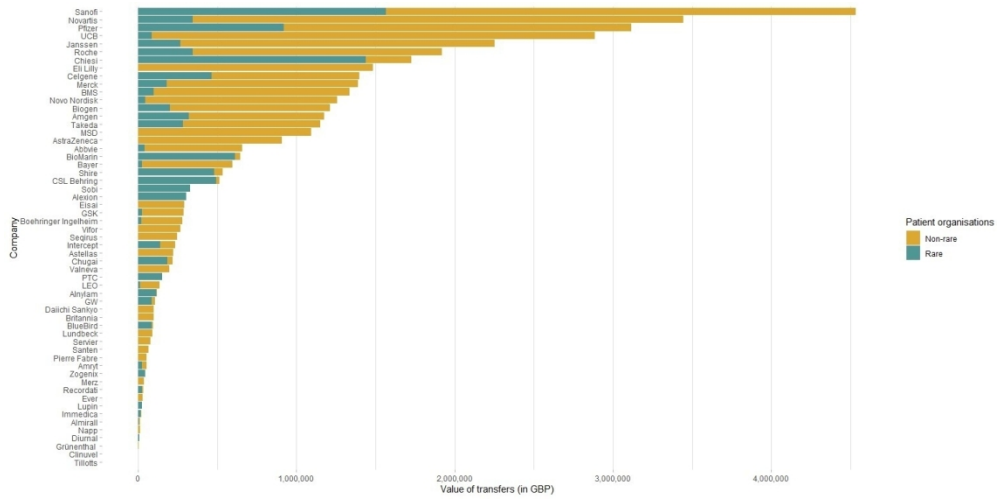

figure 2

130x64mm (300 x 300 DPI)

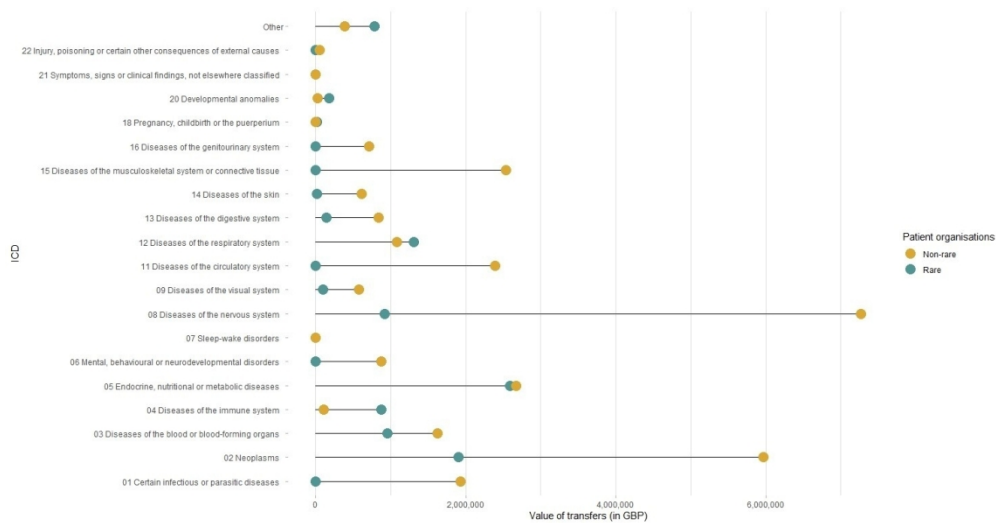

figure 3

124x64mm (300 x 300 DPI)

## Supplemental Material

### Data collection

#### Transfers of value

Data on transfers from pharmaceutical companies to POs from 2018 to 2020 were retrieved in January 2022 from the Disclosure UK patient organisation gateway.<sup>1</sup> The gateway was launched in 2020 and is a collection of hyperlinks to companies' disclosure of transfers to patient organisations. Disclosing financial transfers to patient organisations is a requirement of Clause 29 of the Association of British Pharmaceutical Industry (ABPI) Code of Practice.<sup>2</sup> However, companies signed up to abide by the ABPI Code, accepting the jurisdiction of the Prescription Medicines Code of Practice Authority (code regulator) extends beyond those who are ABPI members and is expected to include most pharmaceutical companies operative in the UK. The websites of all pharmaceutical companies appearing in the Disclosure UK database were screened to ensure all transfers were captured. If transfers were not disclosed in Disclosure UK nor in the company's website, transfer to patient organisations in that year(s).

AG extracted transfer disclosures from companies' websites, comprising of the name of the patient organisation, the year in which the transfer was made, the reason why it was made and its value. Given that a consolidated database of transfers was not available and transfers needed to be manually compiled from each individual of transfers to validate the data collection process and minimise the risk of reporting errors.

All transfers were first adjusted for inflation using the ONS Consumer Price Index<sup>3</sup> and then converted to British Pounds (GBP), using the ONS historical yearly conversion rates.<sup>4 5</sup> All transfers are in 2020 GBP. Data on pharmaceutical companies' portfolio and pi retrieved from their latest annual report, company website and ClinicalTrials.gov,<sup>6</sup> in order of screening.

#### Therapeutic areas

Patient organisations' websites were also screened on. For example, in the case of *Blood Cancer UK*, their *nbias bloodcanceri*,s to " therefore, the condition supported was coded as blood cancer.

After being identified as described above, conditions were further classified into rare and non-rare.

Conditions were considered rare if they appeared in the Orphanet database of rare diseases regardless of their classification level (group of disorders, disorders or subtypes of disorders).<sup>9</sup> For example, multiple myeloma appears in the Orphanet database of rare diseases, therefore a patient organisation focusing this condition would be categorised as rare-focused. When condition sub-types appeared in the Orphanet database screened to check whether its focus was on rare conditions. For example, *Metabolic Support UK's* *m o t t Your rare condition. Our common fight*" and was therefore assumed to be rare

disease-focused. Conversely, should a patient organisation focus on a broader condition such as blood cancer with no sole focus on rare conditions, the organisation would be conservatively considered non-rare. While this approach was preferred as it did not require further assumptions, it entails that only more specialised patient organisations are considered as rare. Such approach might have led to the number and overall value of transfers from pharmaceutical companies to rare diseases-focused patient organisations being underestimated, as these organisations are expected to get less transfers than more generalist ones (e.g. multiple myeloma vs blood cancer).

A third category (*unclear*) was created for non-disease-specific patient organisations, such as coalition of charities or organisations focused on palliative care for terminally ill patients. This category was excluded from the main analyses, but sub-group analyses are reported at the end of the Supplemental Material.

**Companies’ interest**

We developed a methodology to assess the extent to which a pharmaceutical company holds an interest in the disease supported by a patient organisation. For the purpose of this analysis, we adapted the definition of interest provided by NICE.<sup>11</sup> An interest is when there is, or could be perceived to be, an opportunity for a pharmaceutical company to benefit in the disease area where the patient organisation operates. This could include situations where the pharmaceutical company has a drug developed or in development for a condition supported by the patient organisation, or where a drug in the company population affected by the disease supported by the patient organisation.

As first step, the conditions supported by patient organisations were translated into ICD-11 codes using the online ICD-11 database.<sup>12</sup>

ICD-11 codes are mutually exclusive, exhaustive and are arranged as a single hierarchical tree. This means that specific diseases are nested within broader classifications. An example for multiple myeloma is shown in Table 1 below.

**Table 1. Example of ICD-11 classification, Multiple myeloma**

| Hierarchy level | Condition                                       | ICD-11 code |
|-----------------|-------------------------------------------------|-------------|
| Level 1         | Neoplasms                                       | 2           |
| Level 2         | Neoplasms of haematopoietic or lymphoid tissues | 2A          |
| Level 3         | Mature B-cell neoplasms                         | 2A8         |
| Level 4         | Plasma cell neoplasms                           | 2A83        |
| Level 5         | Plasma cell myeloma                             | 2A83.1      |

In this example, multiple myeloma is nested within *Plasma cell myeloma*, who is in its turn nested within *Plasma cell neoplasms* and so on up to *Neoplasms*.

Subsequently, companies’ annual reports, were searched to assess whether the each company had an interest in the condition supported by the patient organisation receiving the transfer. The diagram in the main document (Figure 1)

1  
2  
3 1 schematically illustrates the approach taken to understand whether the company definitely,  
4 2 maybe or did not have an interest in the condition.  
5

6  
7 3 For example, if *Company X* reports in its annual report having a drug in development for  
8 4 multiple myeloma and transferred a sum of money to *Blood Cancer UK*, this would be coded  
9 5 as *maybe yes*, as the company has a product in its pipeline or portfolio associated with a  
10 6 condition supported by the patient organisation. In this case, the ICD-11 level would be 2,  
11 7 *Neoplasms of haematopoietic or lymphoid tissue*, under which multiple myeloma is nested.  
12 8 Conversely, should *Company X* have made a transfer to *Myeloma UK*, this would have been  
13 9 coded as *definitely yes*, as there is perfect alignment between the condition supported by the  
14 10 patient organisation and by *Company X's* drug.  
15

16  
17  
18 11 Situations where a company's interest in a c  
19 12 impossibility of identifying such link, rather than the lack thereof.  
20  
21  
22  
23  
24  
25  
26  
27  
28  
29  
30  
31  
32  
33  
34  
35  
36  
37  
38  
39  
40  
41  
42  
43  
44  
45  
46  
47  
48  
49  
50  
51  
52  
53  
54  
55  
56  
57  
58  
59  
60

### Inclusion/exclusion of patient organisations

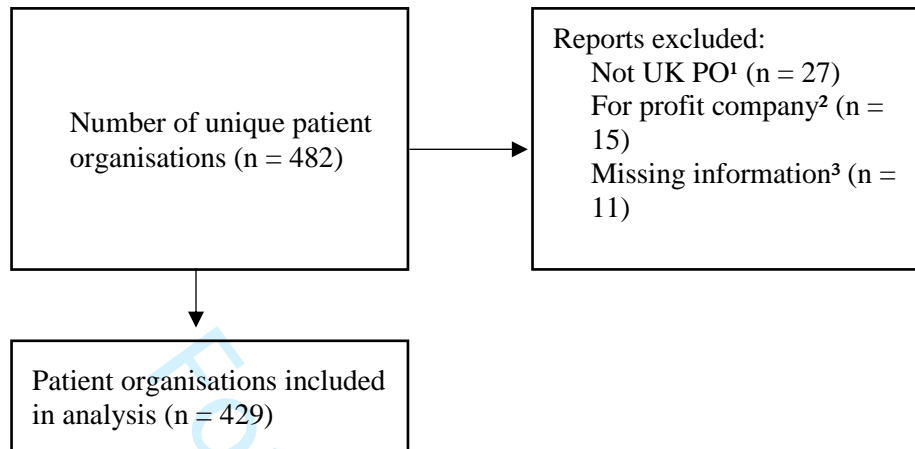

<sup>1</sup>Not aligned with geographical scope e.g. Irish, US-based

<sup>2</sup>Not aligned with EFPIA's definition of patient organisation

<sup>3</sup>Organisations for whose nature is unclear i.e. patient organisation website could not be identified

## Additional tables and figures

**Table 2. Number and value of transfers from the pharmaceutical industry to UK patient organisations broken down rarity of diseases from 2018 to 2020**

|                       | <u>Rare-focused patient<br/>organisations</u> | <u>Non-rare-focused<br/>patient organisations</u> | <u>Overall</u> |
|-----------------------|-----------------------------------------------|---------------------------------------------------|----------------|
| <b>Number of TOVs</b> | 636                                           | 2,324                                             | 2,960          |
| <b>Mean TOV</b>       | £15,395                                       | £12,767                                           | £13,331        |
| <b>Median TOV</b>     | £7,000                                        | £5,085                                            | £5,136         |
| <b>Max. TOV</b>       | £440,229                                      | £946,300                                          | £946,300       |
| <b>Min. TOV</b>       | £17                                           | £7                                                | £7             |
| <b>SD</b>             | £35,478                                       | £31,654                                           | £32,525        |
| <b>TOVs 2018</b>      | £2,329,017                                    | £7,991,072                                        | £10,320,089    |
| <b>TOVs 2019</b>      | £3,281,001                                    | £9,109,462                                        | £12,390,463    |
| <b>TOVs 2020</b>      | £4,180,892                                    | £12,570,028                                       | £16,750,919    |
| <b>Overall TOVs</b>   | £9,790,909                                    | £29,670,562                                       | £39,461,472    |

Abbreviations: SD (standard deviation); TOV (transfer of value).

Figure 1 Value of transfers by receiving patient organisation and funding company, broken down by year

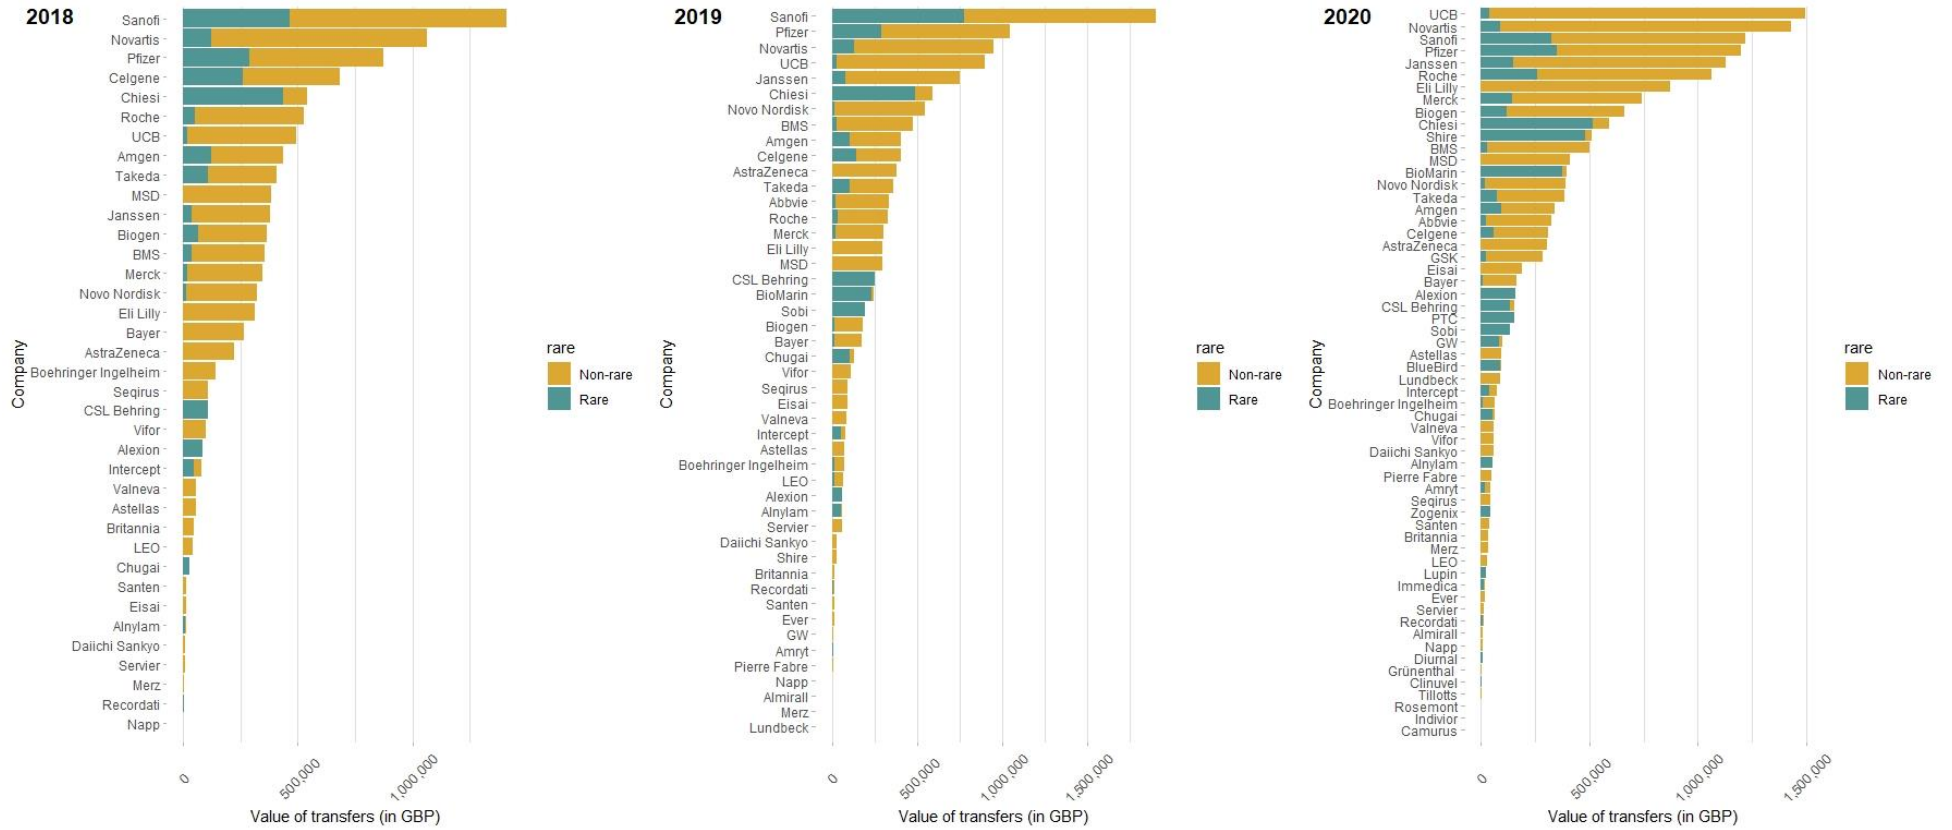



Figure 2. Value of transfers by patient organisation type, therapeutic area and year

A)

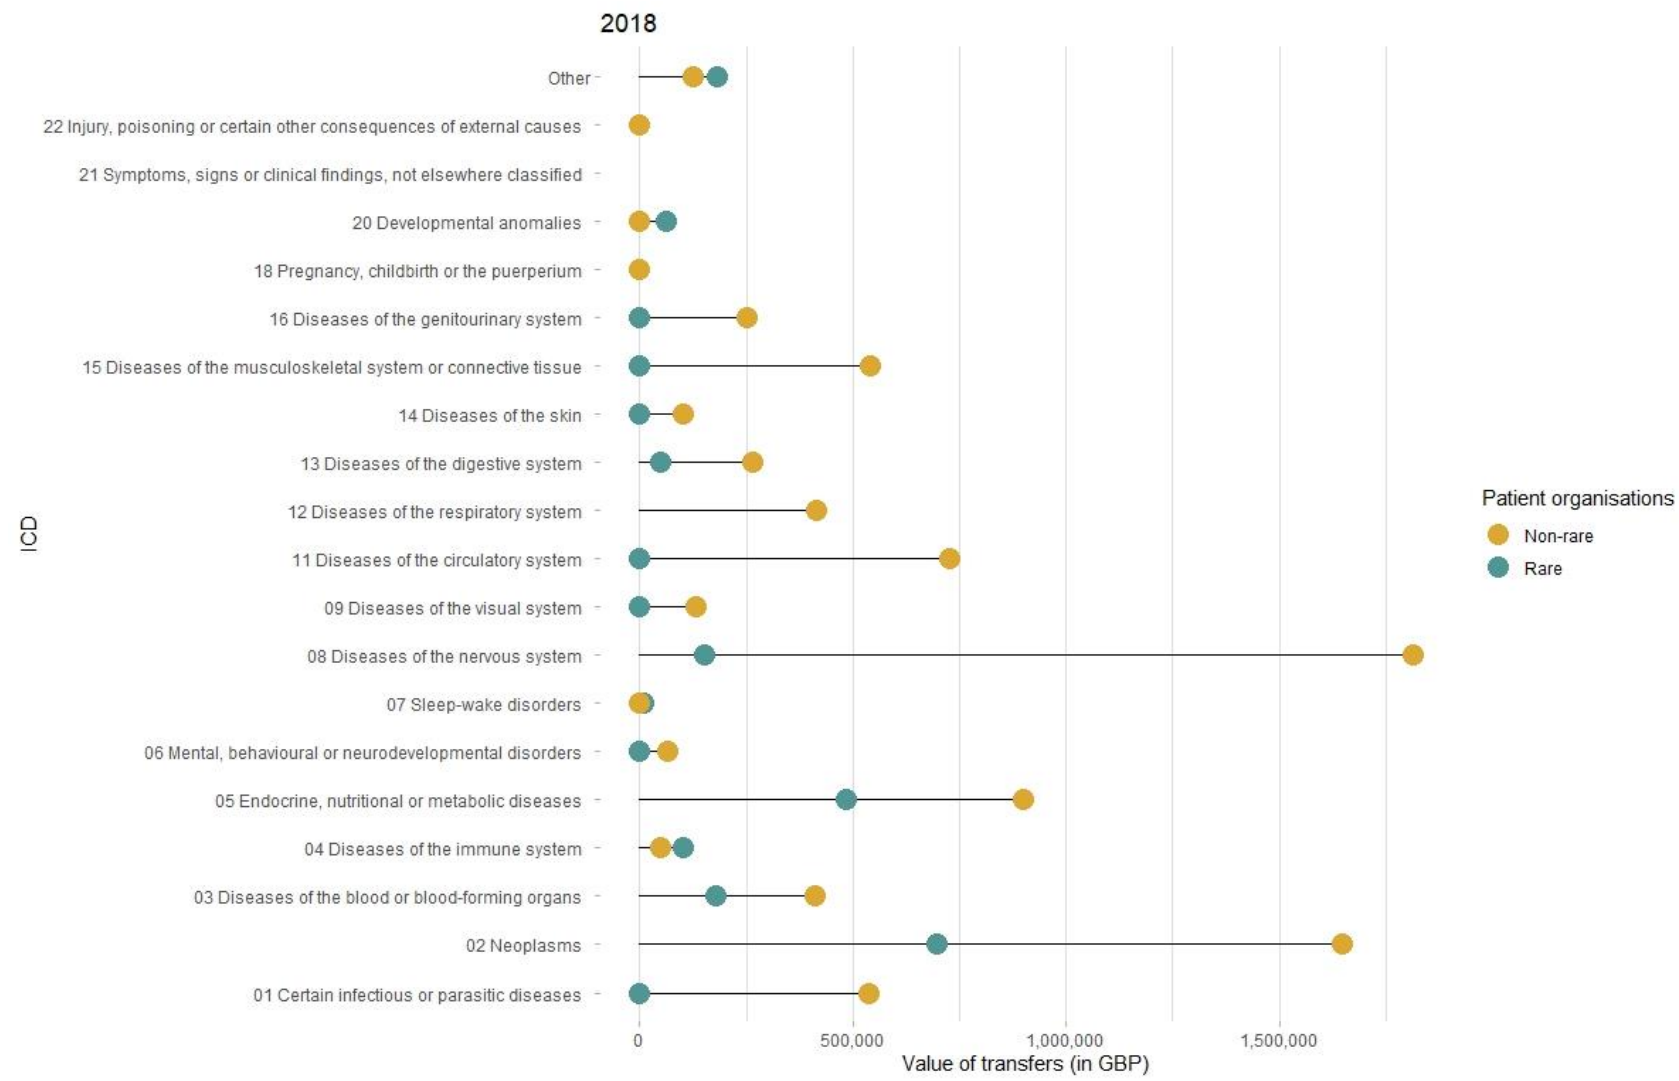

B)

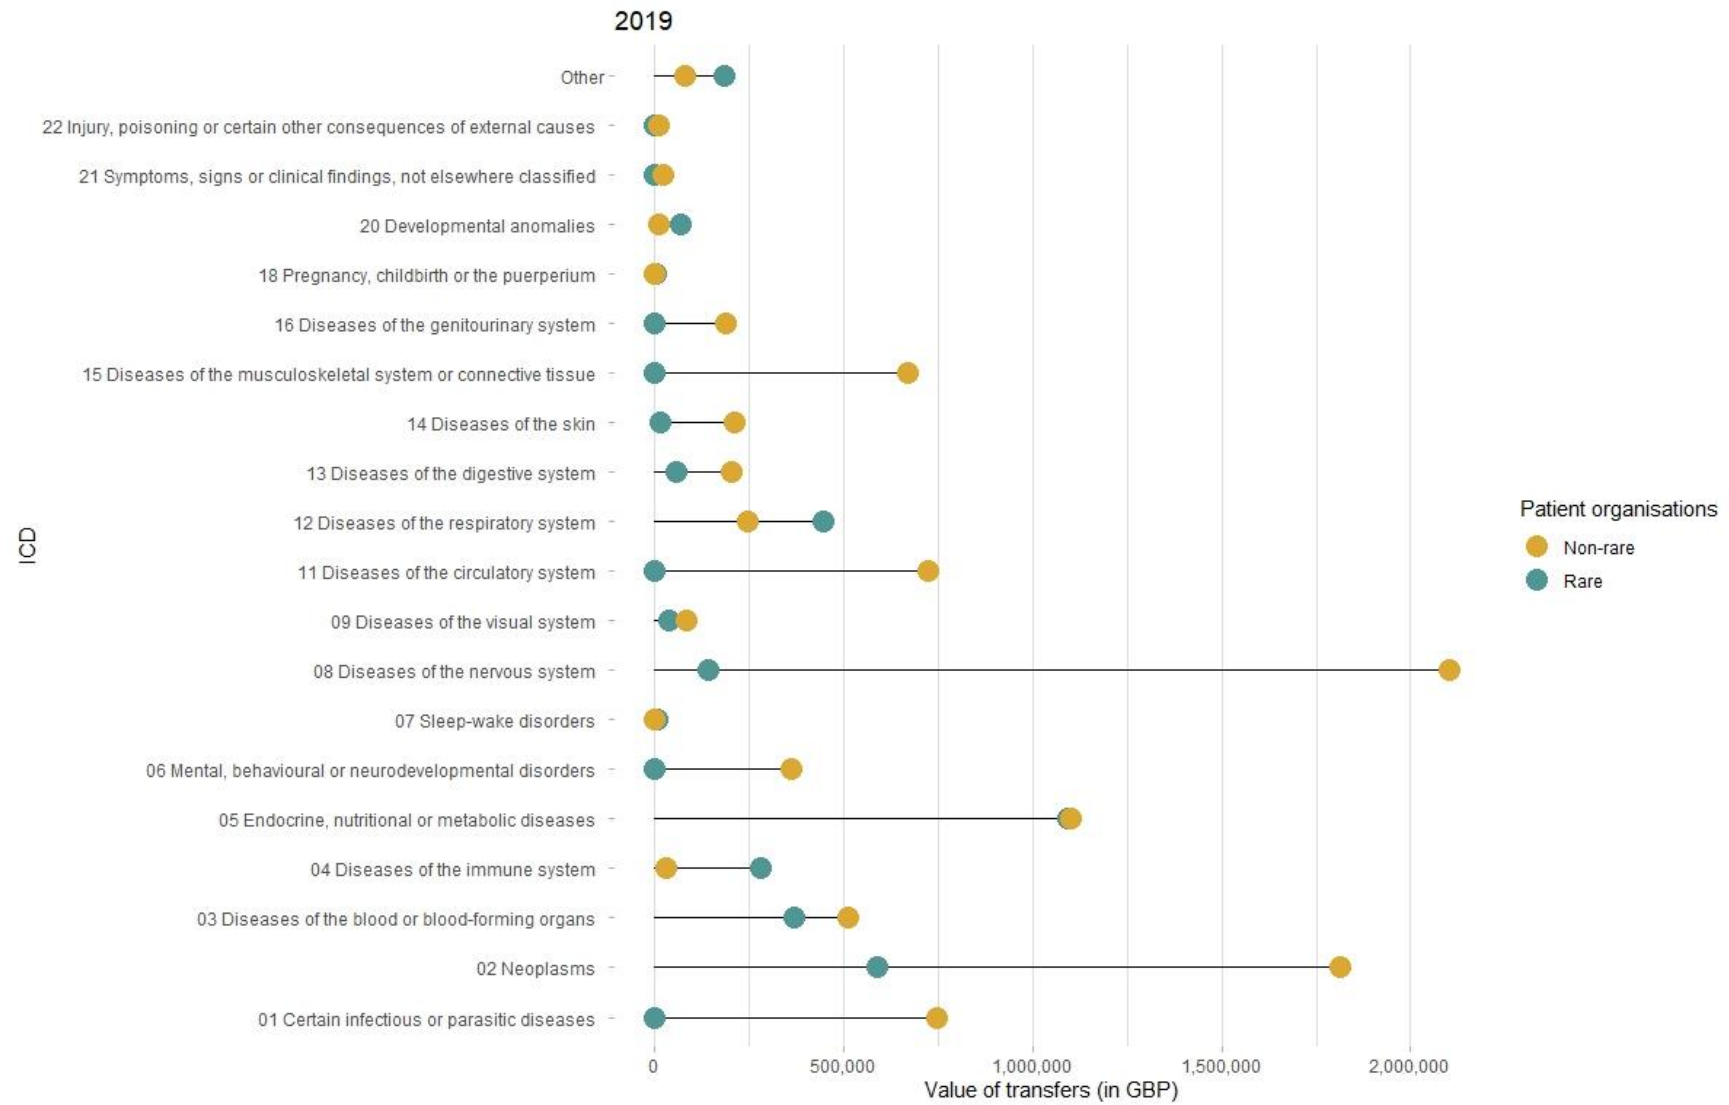

C)

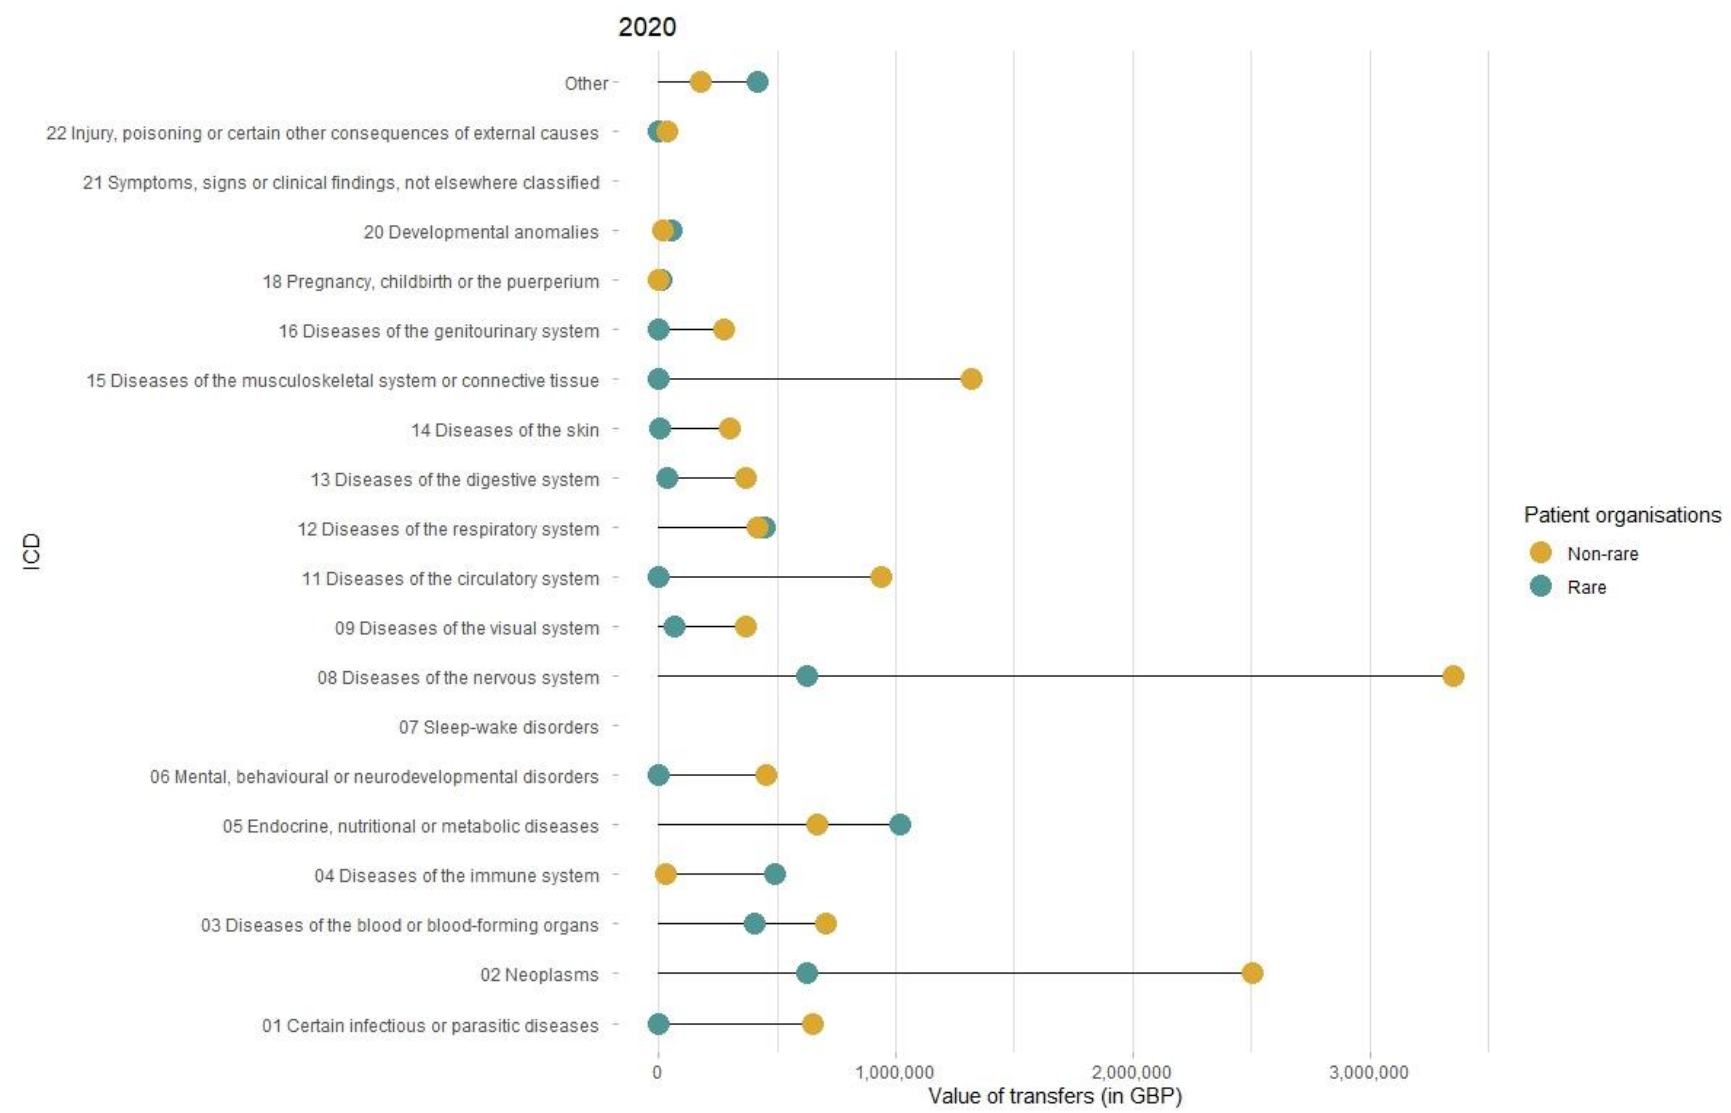

## 1 Sub-group analyses

### 2 Excluded patient organisations

3 181 transfers made 53 to patient organisations were excluded from the analysis as they did not  
 4 m a t c h E F P I A ' *not-for-profit organisations, mainly composed of patients and/or*  
 5 *caregivers, that represent and/or support the needs of patients and/or caregivers*".

6 Figure 3 illustrates the reasons for patient organisations exclusion. Most of the excluded patient  
 7 organisations were not UK-based (56%; n=101), followed by for profit organisations (36%;  
 8 n=66) and organisations for which no information could be found online (8%; n=14).

9 Non-UK patient organisations mostly comprised international alliances of patient  
 10 organisations, European or Irish organisations. We classified organisations as for-profit if they  
 11 appeared in the UK government repository of companies<sup>1</sup> as *private limited companies*. Care  
 12 homes, consultancies and rehabilitation clinics were the most prominent in this category.

13 Overall, transfers to excluded patient organisations amounted to £2,279,445, about 5% of the  
 14 included transfers (Figure 4).

### 15 **Figure 3. Excluded patient organisations by reason of exclusion**

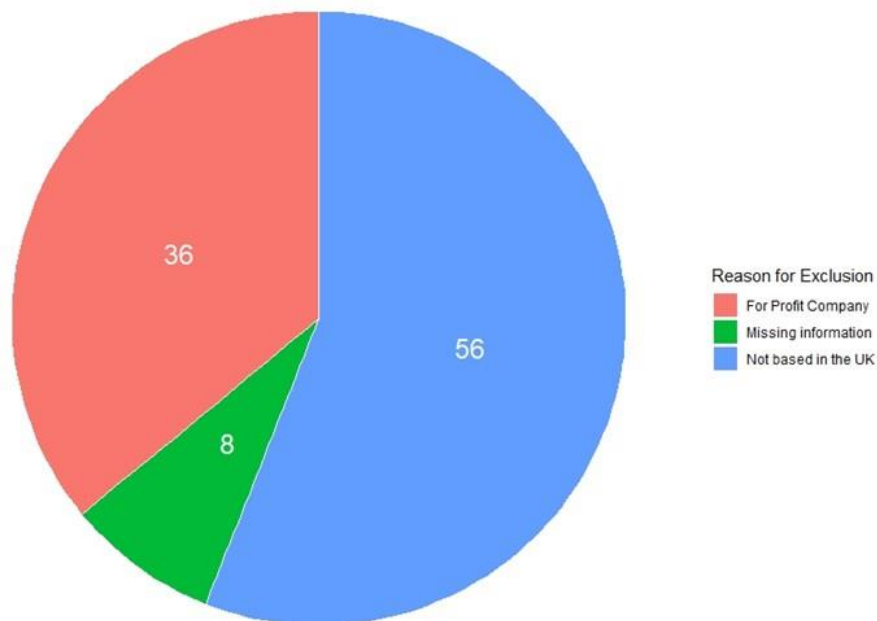

16

<sup>1</sup> <https://find-and-update.company-information.service.gov.uk/>

1 **Figure 4. Transfers to included and excluded patient organisations**

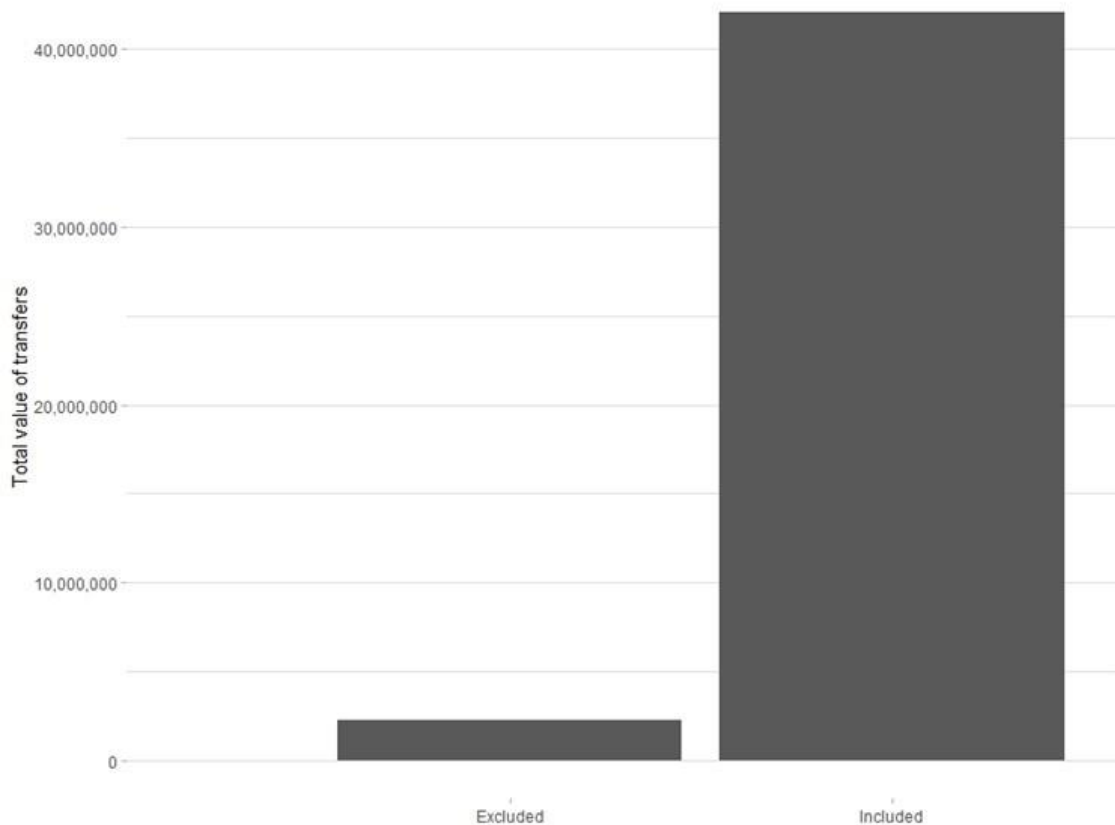

2

3

#### 4 **Non-disease-specific organisations**

5 Overall, 378 transfers were made to non-disease-specific organisations. Of those, 181 were  
6 excluded due to the recipient organisation not meeting the necessary condition to be classified  
7 as a patient organisation (as per the analysis presented above). 197 transfers were made to 63  
8 non-disease-specific patient organisations. These included hospital charities, carers  
9 organisations and hospices.

10 Transfers to non-disease-specific organisations amounted to £ 2,534,044, about 6% of the  
11 included disease-specific transfers (Figure 5).

1 **Figure 5. Transfers to disease and non-disease-specific patient organisations**

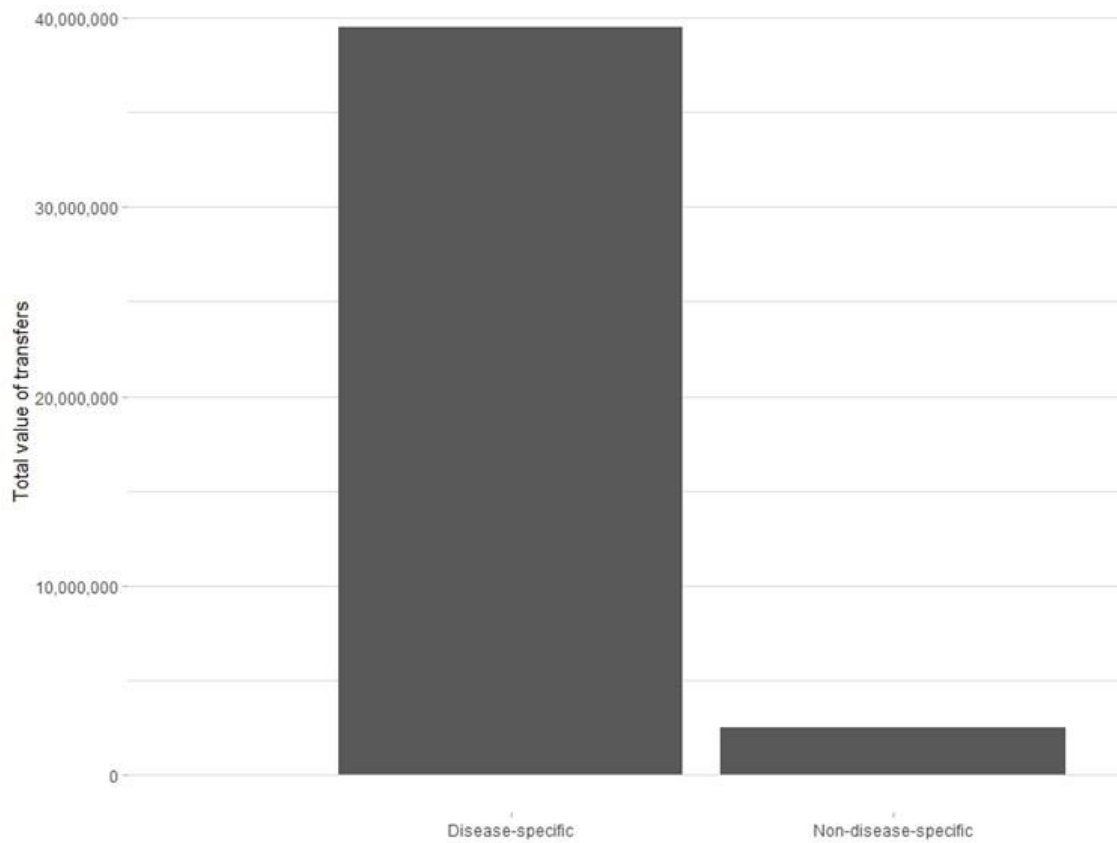

view only

## 1      1      **References**

- 2      2      1. Disclosure UK. ABPI Patient Organisations database 2021 [Available from:  
3      3      <https://search.disclosureuk.org.uk/>.
- 4      4      2. PMCPA. ABPI Code of Practice 2021 [Available from: [https://www.pmcpa.org.uk/the-  
5      5      code/2021-interactive-abpi-code-of-practice/](https://www.pmcpa.org.uk/the-code/2021-interactive-abpi-code-of-practice/).
- 6      6      3. ONS. Consumer price inflation time series: Office for National Statistics; 2022 [Available  
7      7      from:  
8      8      <https://www.ons.gov.uk/economy/inflationandpriceindices/timeseries/155o/mm23>.
- 9      9      4. HMRC. HMRC yearly average and spot rates: HM Revenue and Customs; [Available  
10     10     from: [https://www.gov.uk/government/publications/exchange-rates-for-customs-and-  
11     11     vat-yearly](https://www.gov.uk/government/publications/exchange-rates-for-customs-and-vat-yearly).
- 12     12     5. HMRC. HMRC yearly average and spot rates: HM Revenue and Customs; 2022 [Available  
13     13     from: [https://www.gov.uk/government/publications/exchange-rates-for-customs-and-  
14     14     vat-yearly](https://www.gov.uk/government/publications/exchange-rates-for-customs-and-vat-yearly).
- 15     15     6. NIH U.S. National Library of Medicine. ClinicalTrials.gov [Available from:  
16     16     <https://clinicaltrials.gov/2022>.
- 17     17     7. EFPIA. EFPIA Code of Practice on the Relationships between the Pharmaceutical Industry  
18     18     and Patient Organisations: European Federation of Pharmaceutical Industries and  
19     19     Associations, 2011.
- 20     20     8. Ozieranski P, Rickard E, Mulinari, Shai. Exposing drug industry funding of UK patient  
21     21     organisations. *BMJ* 2019;365:l1806. doi: 10.1136/bmj.l1806
- 22     22     9. Orphanet. The portal for rare diseases and orphan drugs 2022 [Available from:  
23     23     [https://www.orpha.net/consor/cgi-bin/Disease\\_Search\\_Simple.php?lng=EN](https://www.orpha.net/consor/cgi-bin/Disease_Search_Simple.php?lng=EN).
- 24     24     10. Mulinari S, Vilhelmsson A, Rickard E, et al. Five years of pharmaceutical industry  
25     25     funding of patient organisations in Sweden: Cross-sectional study of companies,  
26     26     patient organisations and drugs. *PLoS One* 2020;15(6):e0235021. doi:  
27     27     10.1371/journal.pone.0235021 [published Online First: 20200624]
- 28     28     11. NICE. Policy on declaring and managing interests for NICE advisory committees, 2018.
- 29     29     12. WHO. ICD-11 for Mortality and Morbidity Statistics 2022 [Available from:  
30     30     [https://icd.who.int/browse11/1-  
32     32     m/en#/http://id.who.int/icd/entity/465177735?view=G0](https://icd.who.int/browse11/1-<br/>31     31     m/en#/http://id.who.int/icd/entity/465177735?view=G0).

# BMJ Open

## Industry funding of patient organisations in the United Kingdom: A retrospective study of commercial determinants, funding concentration and disease prevalence

|                                 |                                                                                                                                                                                                            |
|---------------------------------|------------------------------------------------------------------------------------------------------------------------------------------------------------------------------------------------------------|
| Journal:                        | <i>BMJ Open</i>                                                                                                                                                                                            |
| Manuscript ID                   | bmjopen-2022-071138.R1                                                                                                                                                                                     |
| Article Type:                   | Original research                                                                                                                                                                                          |
| Date Submitted by the Author:   | 08-Mar-2023                                                                                                                                                                                                |
| Complete List of Authors:       | Gentilini, Arianna; The London School of Economics and Political Science, Department of Health Policy<br>Parvanova, Iva; The London School of Economics and Political Science, Department of Health Policy |
| <b>Primary Subject Heading</b>: | Health policy                                                                                                                                                                                              |
| Secondary Subject Heading:      | Health policy                                                                                                                                                                                              |
| Keywords:                       | Health policy < HEALTH SERVICES ADMINISTRATION & MANAGEMENT, PUBLIC HEALTH, Health Equity                                                                                                                  |
|                                 |                                                                                                                                                                                                            |

SCHOLARONE™  
Manuscripts





I, the Submitting Author has the right to grant and does grant on behalf of all authors of the Work (as defined in the below author licence), an exclusive licence and/or a non-exclusive licence for contributions from authors who are: i) UK Crown employees; ii) where BMJ has agreed a CC-BY licence shall apply, and/or iii) in accordance with the terms applicable for US Federal Government officers or employees acting as part of their official duties; on a worldwide, perpetual, irrevocable, royalty-free basis to BMJ Publishing Group Ltd ("BMJ") its licensees and where the relevant Journal is co-owned by BMJ to the co-owners of the Journal, to publish the Work in this journal and any other BMJ products and to exploit all rights, as set out in our [licence](#).

The Submitting Author accepts and understands that any supply made under these terms is made by BMJ to the Submitting Author unless you are acting as an employee on behalf of your employer or a postgraduate student of an affiliated institution which is paying any applicable article publishing charge ("APC") for Open Access articles. Where the Submitting Author wishes to make the Work available on an Open Access basis (and intends to pay the relevant APC), the terms of reuse of such Open Access shall be governed by a Creative Commons licence – details of these licences and which [Creative Commons](#) licence will apply to this Work are set out in our licence referred to above.

Other than as permitted in any relevant BMJ Author's Self Archiving Policies, I confirm this Work has not been accepted for publication elsewhere, is not being considered for publication elsewhere and does not duplicate material already published. I confirm all authors consent to publication of this Work and authorise the granting of this licence.

1  
2  
3  
4 1 **Industry funding of patient organisations in the United Kingdom: A**  
5 2 **retrospective study of commercial determinants, funding concentration and**  
6 3 **disease prevalence**  
7  
8  
9

10 4  
11 5 Arianna Gentilini and Iva Parvanova

12 6 Department of Health Policy, London School of Economics and Political Science, London,  
13 7 UK  
14  
15  
16  
17 8  
18  
19 9

20  
21 10 **Corresponding author**  
22

23 11 Arianna Gentilini

24  
25 12 Department of Health Policy  
26 13 Cowdray House, COW.4.09  
27 14 London School of Economics  
28 15 Houghton street  
29 16 London WC2A 2AE  
30 17 England  
31 18 Email: [a.gentilini@lse.ac.uk](mailto:a.gentilini@lse.ac.uk)  
32  
33  
34  
35  
36  
37  
38  
39  
40  
41  
42  
43  
44  
45  
46  
47  
48  
49  
50  
51  
52  
53  
54  
55  
56  
57  
58  
59  
60

# 1 Industry funding of patient organisations in the United Kingdom: A 2 retrospective study of commercial determinants, funding concentration and 3 disease prevalence

## 4 Abstract

5 **Objectives** – To assess the relationship between UK-based patient organisation funding and  
6 companies' commercial interests in rare and non-rare diseases from 2018 to 2020.

7 **Design** – Retrospective analysis of the value and volume of payments from pharmaceutical  
8 companies to patient organisations in the UK matched with data on the conditions supported  
9 by patient organisations and drugs in companies' approved portfolios and research and  
10 development pipelines.

11 **Setting** – UK.

12 **Participants** – 60 pharmaceutical companies making payments to 483 UK-based patient  
13 organisations.

14 **Main outcome measures** – Alignment between the commercial interests of pharmaceutical  
15 companies and the disease area focus of patient organisations; difference in the volume and  
16 value of payments to patient organisations broken down by prevalence of conditions; industry  
17 funding concentration, measured as the number of companies funding each patient  
18 organisations, the share of overall industry funding coming from each contributing company  
19 and the share of industry funding of each organisation comprised by the single highest  
20 payments.

21 **Results** – 3,155 payments were made by 60 companies to 429 patient organisations. Almost  
22 all funds (92%) from pharmaceutical companies were directed to patient organisations that are  
23 aligned with companies' approved drug portfolios and research and development pipelines.  
24 Despite rare diseases affecting less than 5% of the UK population, 25% of all payments were  
25 directed to patient organisations which target such conditions. Patient organisations focusing  
26 on rare diseases relied on payments from fewer companies (*p-value* = 0.008) compared to  
27 organisations focusing on non-rare diseases.

28 **Conclusions** – Companies predominantly funded patient organisations operating in therapeutic  
29 areas relevant to companies' portfolio or drug development pipeline. Patient organisations  
30 focusing on rare diseases received more funding relative to the number of patients affected by  
31 these conditions and relied more heavily on payments from fewer companies compared to  
32 organisations targeting non-rare diseases. Increased independence of patient organisations  
33 could help avoiding conflicts of interest.

### Strengths and limitations of this study

- We develop a methodology to determine the concordance between commercial interests of pharmaceutical companies and disease areas supported by patient organisations.
- We present a comparative analysis of industry funding to patient organisations depending on the prevalence of the disease(s) they support.
- Our analysis focuses on a recent time period which might differ from historical trends.
- The sample size of pharmaceutical companies making payments to patient organisations was not constant over time. However this is expected to have a limited impact, as payment values were similar for companies that consistently disclosed payments.

For peer review only

## 1 Introduction

2 Patient organisations, which represent and support the needs of patients, play an important role  
3 in the development, regulatory review, and adoption of new drugs. They are defined as not-  
4 for-profit organisations, mainly composed of patients and/or caregivers that represent and/or  
5 support the needs of patients or caregivers.<sup>1 2</sup> During research and development, patient  
6 organisations effectively advocate for resources to be directed to conditions where unmet need  
7 is highest.<sup>3 4</sup> Patient organisations support research design and planning, helping to identify  
8 patient-relevant study endpoints.<sup>4</sup> Patient organisations also represent patient views and  
9 preferences at the time of regulatory review and health technology assessment of new drugs.<sup>5</sup>  
10 <sup>6</sup> For example, during technology appraisals conducted by the National Institute for Health  
11 and Care Excellence (NICE), which makes funding recommendations for the English National  
12 Health Service (NHS), patients, and organisations representing the interests of patients, provide  
13 testimonies of their first-hand experiences on how the disease affects them and those around  
14 them.<sup>7</sup> Finally, when drugs are launched, patient organisations contribute to dissemination of  
15 research results to patient community and clinicians, and offer support and information on  
16 therapies available.<sup>4 8</sup>

17 Given the role of patient organisations across many stages of drug development, approval and  
18 access, it is vital to understand their financial ties with pharmaceutical companies. Previous  
19 studies documented the large number and high value of payments from pharmaceutical  
20 companies to patient organisations,<sup>2 8-10</sup> the uneven distribution between and within therapeutic  
21 areas,<sup>2 10</sup> and the concentration of payments coming from a small number of pharmaceutical  
22 firms across multiple jurisdictions.<sup>2 8-15</sup>

23 What remains unknown is the alignment between the commercial interests of pharmaceutical  
24 companies and UK patient organisations' activities. Prior research has demonstrated that  
25 industry tends to prioritize commercially attractive conditions, and there is evidence to suggest  
26 that the marketing of a drug for a particular disease is associated with increased industry  
27 funding to patient organizations operating in that area.<sup>2 10</sup> However, such studies have typically  
28 been conducted in different geographic settings and have focused solely on marketed drugs,  
29 rather than examining the entire research and development pipeline of pharmaceutical  
30 companies. This is especially important given the lengthy timeline for drugs to reach the  
31 market,<sup>16</sup> as failure to consider drugs currently undergoing clinical trials may result in an  
32 incomplete picture.

33 Another gap in the literature relates to the dynamics between the pharmaceutical industry and  
34 patient organisations supporting rare vs. non-rare conditions.

35 The fragmented nature of rare diseases, coupled with the lack of interest from policymakers  
36 and manufacturers, who often prioritize more profitable and prevalent diseases, has  
37 necessitated the formation of patient organizations to advocate for the needs of rare disease  
38 patients.<sup>17 18</sup> The National Organization for Rare Disorders (NORD), serves as the umbrella  
39 organization for rare disease patients in the United States (US) and has been instrumental in  
40 lobbying for scientific support and economic incentives to stimulate innovation in rare  
41 diseases.<sup>19</sup> This advocacy ultimately led to the passing of the Orphan Drug Act in 1983 in the  
42 USA and the EU Regulation on Orphan Medicinal Products in Europe in 2000.<sup>20 21</sup>

1  
2  
3 1 Moreover, the limited availability and complexity of medical knowledge regarding rare  
4 2 diseases have also fostered patients and families affected by these conditions to come together  
5 3 to provide each other with support and medical expertise.<sup>17 22</sup> Patient organisations, which are  
6 4 primarily composed of patients and their caregivers, are in a unique position to share first-hand  
7 5 experiences that can inform research and regulatory decisions.<sup>23</sup> While this is true also for non-  
8 6 rare conditions, patient organisations' input in regulatory and health technology appraisals is  
9 7 particularly important in the context of rare diseases due to scarce evidence. For example, the  
10 8 Scottish Medicines Consortium (SMC) provides opportunities for patient groups and clinicians  
11 9 to have a stronger voice in the decision-making process for drugs used to treat rare and end-of-  
12 10 life conditions.<sup>24</sup> Similarly, three members of patient organisations sit in the Committee for  
13 11 Orphan Medicinal Products (COMP) within the European Medicines Agency (EMA), the body  
14 12 responsible for granting orphan designations to drugs. Patient organisation-led registries that  
15 13 collect real-world data on disease progression can de-risk drug development for rare diseases.<sup>17</sup>  
16 14 While observational studies are common in non-rare diseases, they usually do not require the  
17 15 support of patient organisations' networks as patients are easier to identify and recruit.<sup>3</sup>

18 16 Finally, there has been limited exploration of the concentration of industry funding for patient  
19 17 organizations. A recent study by Mulinari and colleagues (2022) examined the average number  
20 18 of pharmaceutical companies making payments to Danish patient organizations,<sup>15</sup> while only  
21 19 one study has investigated the share of industry funding and the top drug company donor's  
22 20 share in UK patient organizations' income.<sup>11</sup> However, no study has specifically focused on the  
23 21 number of companies funding UK patient organizations, nor have they explored whether  
24 22 organisations' industry funding differs based on disease rarity.

25 23 Our paper aims to contribute to and expand on existing literature by examining the concordance  
26 24 between the commercial interests of pharmaceutical companies and patient organizations'  
27 25 activities in the UK. Using publicly available data on payments between 2018 and 2020, we  
28 26 analysed the volume, value of payments to patient organisations according to their disease area  
29 27 of interest, with the objective of examining whether there are differences in funding patterns  
30 28 between rare and non-rare diseases. Lastly, we examined the concentration of industry funding,  
31 29 namely how many companies funded each patient organisation and the extent to which  
32 30 organisations might have been reliant on funding from a single company. Based on the  
33 31 reviewed literature, we formulated the following hypotheses:

- 34 32 - *Hypothesis 1:* With respect to value and volume of industry payments to patient  
35 33 organisations, we expect similar overall funding patterns to those reported in the  
36 34 existing literature – namely an increase over time;<sup>2</sup>
- 37 35 - *Hypothesis 2:* Regarding the concordance between the commercial interests of  
38 36 pharmaceutical companies and patient organisations' activities, we expect no difference  
39 37 between rare and non-rare patient organisations, under the assumption that companies  
40 38 are unlikely to invest in such organisations out of altruistic motives;
- 41 39 - *Hypothesis 3:* Furthermore, we hypothesise that patient organizations targeting rare  
42 40 diseases would receive less overall funding due to their low prevalence;
- 43 41 - *Hypothesis 4:* Considering the limited availability of drugs for rare diseases from a  
44 42 handful of manufacturers, we expect organizations focusing on these conditions to rely

1  
2  
3  
4  
5  
6  
7  
8  
9  
10  
11  
12  
13  
14  
15  
16  
17  
18  
19  
20  
21  
22  
23  
24  
25  
26  
27  
28  
29  
30  
31  
32  
33  
34  
35  
36  
37  
38  
39  
40  
41  
42  
43  
44  
45  
46  
47  
48  
49  
50  
51  
52  
53  
54  
55  
56  
57  
58  
59  
60

1 on payments of higher value and from fewer companies compared to those targeting  
2 more prevalent conditions.

For peer review only

## 1 **Methods**

### 2 **Data on industry payments**

3 We used the Disclosure UK patient organisation gateway (in January 2022) as well as  
4 companies' websites to retrieve data on payments from the pharmaceutical industry to UK  
5 patient organisations from 2018 to 2020.<sup>25</sup> The gateway was launched in 2020 and is a  
6 collection of hyperlinks to companies' disclosure of payments to patient organisations.  
7 Disclosing payments to patient organisations is a requirement of Clause 29 of the Association  
8 of British Pharmaceutical Industry (ABPI) Code of Practice.<sup>26</sup> Companies that sign up to abide  
9 by the ABPI Code accept the jurisdiction of the Prescription Medicines Code of Practice  
10 Authority (PMCPA, code regulator), which extends beyond those who are ABPI members.<sup>26</sup>  
11 This requirement therefore affects virtually all pharmaceutical companies operating in the UK.  
12 Companies might be sanctioned by the PMCPA if they do not disclose their payments.<sup>26</sup> We  
13 screened the websites of all pharmaceutical companies abiding by the ABPI Code, most of  
14 which provided a link in the Disclosure UK database, and retrieved payments information  
15 companies' websites to ensure all payments were captured. If payments were not disclosed in  
16 Disclosure UK nor in the company's website, we assumed the company was did not make any  
17 payments to patient organisations in a given year which is commonly assumed in the literature.<sup>2</sup>

18 One investigator (AG) extracted payment disclosures from the companies' websites. These  
19 comprised the name of the patient organisation, the year when the payment was made, the  
20 reason for the payment and its value in the currency reported by the disclosing company. All  
21 payments were first adjusted for inflation using the ONS Consumer Price Index.<sup>27</sup> When  
22 reported in different currencies, such as United States Dollars (USD), Swiss Franc (CHF),  
23 Swedish Krona (SEK), Norwegian Krone (NKK) and Danish Krone (DKK), the value of the  
24 payment was converted to Great British Pounds (GBP), using the ONS historical yearly  
25 conversion rates.<sup>28 29</sup> We reported all payments in 2020 GBP. Two in-kind payments with a  
26 monetary value of zero were excluded from the analysis.

### 27 **Data on patient organisations**

28 We retrieved data on patient organisations from their websites. Details on the therapeutic area  
29 they advocated for – proxied by International Classification of Diseases Version 11 (ICD-11)  
30 codes – and whether the condition(s) was rare or non-rare were also extracted. Conditions were  
31 considered rare if they appeared in the Orphanet database of rare diseases.<sup>30</sup> Orphanet is a  
32 unique platform and repository of data on rare diseases and orphan drugs. Patient organisations  
33 that were not disease specific, such as hospital charities, carers organisations and hospices, or  
34 that did not match the European Federation of Pharmaceutical Industries and Associations  
35 (EFPIA) definition of what constitutes a patient organisation were excluded from the analysis.  
36 We chose the EFPIA's definition for the following reasons. First, this corresponds the  
37 definition used in the wider peer-reviewed literature.<sup>2 31</sup> Second, other commonly used  
38 definitions, such as the one from the EMA, refer to the structure of patient organisations'  
39 governing bodies, which have to consist of over 50% patients.<sup>32</sup> Considering the high number  
40 of patient organisations included in our analysis, this requirement was challenging – if not  
41 impossible – to verify. Second, EFPIA's definition indicates what the pharmaceutical industry  
42 considers to be a patient organisation. Therefore, it helped us minimize selection bias issues as



1 it includes a wide range of organisations. We excluded excluding 181 payments to patient  
2 organisations that did not match EFPIA's definition. Sub-group analyses on excluded  
3 organisations can be found in the Supplemental Material.

#### 4 **Determining commercial interests**

5 We assessed whether – and the extent to which – a pharmaceutical company holds an interest  
6 in the disease supported by a patient organisation. We adapted the definition of 'interest'  
7 provided by NICE<sup>33</sup>. An interest is when there is, or could be perceived to be, an opportunity  
8 for a pharmaceutical company to benefit in the disease area where the patient organisation  
9 operates. This could include cases where the pharmaceutical company has a drug developed or  
10 in development for a condition targeted by the patient organisation, or where a drug in the  
11 company's portfolio or pipeline is restricted to a specific population affected by the disease  
12 supported by the patient organisation. We define portfolio as a group of drugs that a  
13 pharmaceutical company has already developed, gained regulatory approval for, and is actively  
14 marketing or selling. Conversely, pipeline refers to the collection of drug candidates being  
15 developed by a pharmaceutical company, at various stages of development, from preclinical  
16 research to clinical trials.

17 To establish whether an interest existed or not, we first classified the conditions targeted by  
18 patient organisations to ICD-11 codes using the online ICD-11 database.<sup>34</sup> ICD-11 codes are  
19 mutually exclusive, exhaustive and are arranged as a single hierarchical tree, from level one  
20 (most general e.g., *neoplasms*) to five (most specific, e.g. *plasma cell myeloma*). This means  
21 that specific diseases are nested within broader classifications.

22 We then searched companies' annual reports, websites and the ClinicalTrials.gov registry to  
23 determine whether each company had an interest in the condition targeted by the patient  
24 organisation receiving the payment. Figure 1 schematically illustrates the approach taken to  
25 understand whether – and the degree to which – a company has an interest in the conditions  
26 (*definitely yes, probably yes, no*). For example, if *Company X* declares in its annual report  
27 having a drug in development for multiple myeloma and made a payment to *Blood Cancer UK*,  
28 this would be coded as *probably yes*, as the company has a product in its pipeline or portfolio  
29 nested within a broader class of conditions targeted by the patient organisation. Conversely,  
30 should *Company X* have made a payment to *Myeloma UK*, this would have been coded as  
31 *definitely yes*, as there is perfect alignment between the condition targeted by the patient  
32 organisation and by *Company X's* drug. Cases in which a company's interest in a certain  
33 condition could not be identified were coded as *no*. These, however, were due to limitations in  
34 data availability and therefore did not indicate that there was no company interest. Data on  
35 pharmaceutical companies' portfolio and pipeline were retrieved from their latest annual  
36 reports, company websites and ClinicalTrials.gov.<sup>35</sup>

37 One investigator (AG) initially coded all data, while the other (IP) blindly re-coded a 30%  
38 random sample of payments to validate the data collection process and minimise the risk of  
39 reporting errors. We followed this process when validating all data sources described above.  
40 Any disagreement was discussed until consensus was reached.

### 1 **Analysis of industry funding concentration**

2 We assessed the concentration of industry funding received by patient organisations. In a prior  
3 study, Ozieranski and colleagues examined funding disparities among healthcare organizations  
4 in the UK in 2015, using the Gini coefficient to assess the distribution of funding.<sup>36</sup> However,  
5 the authors acknowledged that the data preparation process presented challenges, limiting the  
6 analysis to payments from a single year. While this methodology has its advantages, we found  
7 that the time-consuming process of reshaping the data outweighed the benefits over using  
8 descriptive statistics. In particular, we calculated (1) the number of companies funding each  
9 patient organisations, (2) the share of all industry funding to each patient organisations coming  
10 from each contributing company and (3) the share of industry funding of each organisation  
11 comprised by the single highest payment.

12 The Supplemental Material provides further details on the data collection and how the  
13 outcomes were constructed. Descriptive statistics and tests, such as ranges and K-sample tests,  
14 were presented in the analysis. These statistics were preferred over the mean in light of the  
15 skewed distribution of the data analysed. All analyses and data visualisations were performed  
16 using Stata 17 and RStudio (*ggplot2* package), respectively.

### 17 **Patient and public involvement**

18 Patients were not involved in this study as our analyses focused on patient organisations as  
19 institutional actors rather than single patients with specific conditions. We plan to disseminate  
20 key findings from our analysis to patients and members of the public.

## 1 Results

2 Between 2018 and 2020, 60 companies made 3,155 payments to 429 patient organisations in  
3 the study period, amounting to £42 million. The value of the payments rose substantially over  
4 time, from £10.9 million in 2018 to £18 million in 2020. While this is partially due to the  
5 different sample of contributing companies across years (see Supplemental Materials), similar  
6 upward trends are observed among the 37/60 companies that consistently disclose payments  
7 for all year in the analysis (10.9 million in 2018 vs 15.5 million in 2020). These results confirm  
8 our expectations of increasing industry funding as expressed in *Hypothesis 1*.

9 Overall, *diseases of the nervous system* (£8.2 million) was the most funded therapeutic area  
10 over time, followed by *neoplasms* (£7.9 million) and *endocrine, nutritional or metabolic*  
11 *diseases* (£5.3 million). About 50% of the payments made to organisations targeting *diseases*  
12 *of the nervous system* were made in 2020 alone. Sanofi, Novartis, Pfizer, UCB and Janssen  
13 were the top five funders over the study period (Figure 2). These companies contributed to  
14 between 37% and 44% of all payments.

15 Table 1 summarises the number and value of payments to patient organisations.

### 16 Companies' interest in payments to patient organisations

17 Between 2018-2020, 92% of the payments were directed to patient organisations that were  
18 judged to be aligned with their portfolio and pipeline. Only 8% of payments were made to  
19 organisations that focused on conditions that could not be linked to a product in the funder's  
20 portfolio or pipeline. Table 2 shows the volume and value of payments, broken down by the  
21 company's interest variable, overall and whether patient organisations targeted a rare or non-  
22 rare disease. Payments to patient organisations targeting a disease for which the company has  
23 a product developed or in development (*definitely yes*) made up around 52% regardless of the  
24 rarity of the condition targeted as anticipated in *Hypothesis 2*.

25 The monetary value of payments coded as *definitely yes* accounted for 62% of the overall  
26 payment value. However, this was as high as 69% for patient organisations targeting rare  
27 diseases, versus 62% for organisations focusing on non-rare conditions. When payments coded  
28 as *probably yes* were included, this share increased to 97% for both patient organisations  
29 focusing on rare and non-rare diseases.

1 **Table 1. Number and value of payments from the pharmaceutical industry to UK patient organisations broken down by year and rarity of diseases**

|                                           | <u>2018</u>               | <u>2019</u>               | <u>2020</u>               | <u>All years (2018-2020)</u> |
|-------------------------------------------|---------------------------|---------------------------|---------------------------|------------------------------|
| <b>Number of payments</b>                 | 924                       | 1,063                     | 1,168                     | 3,155                        |
| <b>Median payment (IQR; overall)</b>      | £5,136 (£678 - £12,756)   | £5,085 (£636 - £12,680)   | £9,000 (£1,894 - £15,205) | £5,400 (£921 - £15,000)      |
| <b>Median payment (IQR; rare)</b>         | £7,190 (£1,249 - £15,408) | £5,085 (£1,236 - £12,204) | £8,500 (£2,500 - £15,000) | £7,000 (£1,777 - £15,000)    |
| <b>Median payment (IQR; non-rare)</b>     | £3,082 (£616 - £11,468)   | £4,800 (£508 - £12,712)   | £9,120 (£1,540 - £16,175) | £5,085 (£740 - £14,880)      |
| <b>Value of payments (£; overall)</b>     | £10,933,715               | £13,046,079               | £18,015,722               | £41,995,516                  |
| <b>Value of payments (£; rare)</b>        | £2,329,017                | £3,281,001                | £4,180,892                | £9,790,909                   |
| <b>Value of payments (£; non-rare)</b>    | £7,991,072                | £9,109,462                | £12,570,027               | £29,670,563                  |
| <b>Number of pharmaceutical companies</b> | 37                        | 47                        | 60                        | 60                           |
| <b>Number of patient organisations</b>    | 221                       | 268                       | 294                       | 429                          |

2 Abbreviations: IQR (Interquartile range).

3 Notes: All payments are expressed in 2020 GBP. The Supplemental Materials detail the inflation multipliers and conversion rates used, both retrieved from the Office of  
4 National Statistics (ONS) website. Further details on how patient organisation data were cleaned and coded, please see the Supplemental Materials . Please note that the  
5 number of pharmaceutical companies and patient organisations making and receiving payments across the study period (2018-2020) refers to companies and organisations  
6 that made or received at least one payment, respectively.

8 **Table 2. Volume and value of payments by company interests across all years**

| <b>PO type</b> | <b>Company's interest</b> | <b>Volume; n (%) All years (2018-2020)</b> | <b>Value: £ (%) All years (2018-2020)</b> |
|----------------|---------------------------|--------------------------------------------|-------------------------------------------|
| Overall†       | Definitely yes            | 1,627 (52%)                                | £26,002,527 (62%)                         |
|                | Probably yes              | 1,265 (40%)                                | £12,724,965 (30%)                         |
|                | No*                       | 263 (8%)                                   | £3,262,205 (8%)                           |
| Rare           | Definitely yes            | 339 (54%)                                  | £6,725,300 (69%)                          |
|                | Probably yes              | 262 (41%)                                  | £2,713,531 (28%)                          |
|                | No*                       | 34 (5%)                                    | £352,078 (4%)                             |
| Non-rare       | Definitely yes            | 1,276 (55%)                                | £19,121,806 (62%)                         |
|                | Probably yes              | 977 (42%)                                  | £9,827,287 (35%)                          |
|                | No*                       | 71 (3%)                                    | £721,468 (3%)                             |

1  
2  
3  
4  
5  
6  
7  
8  
9  
10  
11  
12  
13  
14  
15  
16  
17  
18  
19  
20  
21  
22  
23  
24  
25  
26  
27  
28  
29  
30  
31  
32  
33  
34  
35  
36  
37  
38  
39  
40  
41  
42  
43  
44  
45  
46

1 Notes: *Definitely yes* indicates payments directed to patient organisations that operated in a disease area (ICD-11 level 4 or higher) for which the company has a product in its  
 2 portfolio or pipeline. *Probably yes* indicates directed to patient organisations that operated in a disease area (ICD-11 level 3 or lower) for which the company has a product in  
 3 its portfolio or pipeline. *No* refers to directed to patient organisations that operated in a disease area for which no link could be found to the company’s portfolio or pipeline.  
 4 The higher the ICD-11, the more specific the condition. For example, if the ICD-11 level 4 is *Plasma cell neoplasms*, level 2 would be *Neoplasms of hematopoietic or lymphoid*  
 5 *tissues*. Further details on how this variable was constructed can be found in the Supplemental Material.  
 6 \*Please note that the *No* category of interest conservatively includes also interests that were considered as unclear.  
 7 †Please note that the *Overall* results are not a sum of the *Rare* and *Non-rare* results, as they also include patient organisations that could not be classified in either group.

For peer review only

### 1 **Industry funding of patient organisations focusing on rare vs. non-rare conditions**

2 Of the £42 million in payments from industry to patient organisations, £9.8 million (23%;  
3 n=635) were directed to organisations focusing on rare diseases while £29.7 million (71%;  
4 n=2,323) to organisations supporting non-rare conditions. The remaining 6% were directed to  
5 non-disease-specific patient organisations, which were excluded from the analysis.

6 From 2018 to 2020, the payments to patient organisations targeting rare diseases increased  
7 more compared to those focusing on more prevalent conditions (80% vs 57%). Median  
8 payments received by patient organisations were significantly different ( $p<0.001$ ) depending  
9 on the rarity of the disease they focused on, with rare patient organisations receiving higher  
10 payments. Linking these results to *Hypothesis 3*, we can see that while patient organisations  
11 supporting rare diseases received less funding in the period, there was a significantly higher  
12 increase in payment value.

13 Among the top five recipients overall in 2018 and 2019, two focused on rare diseases (Myeloma  
14 UK and the Cystic Fibrosis Trust). In 2020 no organisation targeting rare conditions appeared  
15 in the top five recipients. Figure 3 shows therapeutic areas in order from most to least funded,  
16 broken down by rarity of disease targeted. In the case of organisations focusing on rare  
17 diseases, *neoplasms* and *endocrine, nutritional or metabolic disease* received most funds across  
18 years. Together, the top three most funded disease areas represented more than half of overall  
19 funding. When looking at the conditions that attracted most funding, multiple sclerosis was  
20 first (£4.1 million), followed by diabetes (£2.4 million) and epilepsy (£1.7 million). Cystic  
21 fibrosis and multiple myeloma were the only rare diseases that were among the top ten most  
22 funded conditions overall, attracting £1.3 and £1.2 million, respectively.

### 1 **Industry funding concentration**

2 On average, each patient organisation received payments from approximately two companies  
3 every year, with 1.97 (SD:1.74) and 2.21 (SD:1.91) companies funding patient organisations  
4 targeting rare and non-rare diseases, respectively. However this difference was not statistically  
5 significant ( $\chi^2 = 0.197$ ,  $p$ -value = 0.657).

6 In our sample, the median yearly payment of a company to a patient organisation comprised  
7 33% of the its overall industry payments (IQR: 11.2%-100%). When looking at patient  
8 organisations focusing on rare diseases, the median company contribution was as high as 42%  
9 (IQR: 14.5%-100%) versus 31% (IQR: 11.6%-99.7%) for non-rare conditions ( $\chi^2 = 7.141$ ,  $p$ -  
10 value = 0.008).

11 Finally, the share of industry funding comprised by the single highest payment per organisation  
12 amounted to an average of 73% (SD: 0.29) for all years, ranging from a minimum of 10% to a  
13 maximum of 100%. When broken down by year, this percentage slightly decreased over time.  
14 The highest value payment in the case of patient organisations targeting rare diseases made up  
15 a larger share of the overall industry funding (median: 86%, IQR: 0.527-1), despite not  
16 significant, compared to those focusing on more prevalent conditions (median: 79%, IQR:  
17 0.428-1). While there was not a significant difference in the number of funding companies  
18 between patient organisations supporting rare and non-rare diseases as stated in *Hypothesis 4*,  
19 the former relied on larger payments.

## Discussion

In this study, we evaluated the financial links between the pharmaceutical industry and patient organisations in the UK between 2018 and 2020. This is the first study to document the almost-perfect concordance of pharmaceutical company interests and patient organisation funding in the UK. Almost all industry payments during our study period – in terms of both volume (92%) and value (92%) – were to patient organisations aligned with pharmaceutical companies' portfolios and pipelines. Approximately a quarter of industry funding to patient organisations from 2018 to 2020 was directed towards organisations focusing on rare diseases (£9.8 million / £42 million). Finally, we found that patient organisations targeting rare diseases relied on payments from fewer companies but of higher value compared to organisations focusing on non-rare diseases.

The almost-perfect concordance between industry interests and patient organisation activities likely reflect the commercial attractiveness of conditions targeted by pharmaceutical companies.<sup>2 37</sup> Such close alignment between the interests of companies and patient organisations might undermine the credibility of patient organisations as perceived by the general public and might raise questions about patient organisations' inputs in regulatory and health technology appraisals.<sup>9 38 39</sup> A recent study found that during NICE appraisal meetings fewer than 25% of all relevant financial ties between patient organisations and pharmaceutical companies were disclosed.<sup>40</sup> As discussed by the Mandeville and colleagues, this lack of transparency increases the risk of conflict of interest.

Our findings make an important contribution to the existing body of literature on industry funding of patient organisations. Ozieranski et al found that industry donated over £57 million to UK patient organisations from 2012 to 2016, an average of £11.5 million per year.<sup>2</sup> The authors also observed that payments were concentrated in commercially attractive therapeutic areas, with organisations focusing on cancer receiving more than 36% of overall payments.<sup>2</sup> However, the study did not examine whether companies were more likely to fund organisations that target diseases for which they have already developed or are currently developing products. Another earlier study examined payments to Swedish patient organisations and found an association between drug commercialisation and industry funding.<sup>10</sup> The authors did not take into account products in the companies' pipelines nor drugs that might not yet have been launched in Sweden. Considering that patient organisations have an important role not only in the post-commercialisation phase but also in the R&D and approval stages. We therefore developed a replicable classification model to determine whether payments from companies were directed at organisations that were aligned with their portfolios and pipelines.

Patient organisations focusing on rare diseases can drive both supply of and demand for medicinal products due to their research, advocacy and education role.<sup>4 41</sup> As a result of their close ties with patients, these organisations have the credibility and power to educate patient communities, advocate for access to available therapies and raise awareness on the unmet need of certain conditions.<sup>4 17 42</sup> Although a large share of both the value and number of payments were directed to patient organisations focusing on rare diseases, most funds targeted commercially attractive rare conditions, such as multiple myeloma and cystic fibrosis, where the unmet need is relatively low compared to other rare conditions. These are diseases that have



1 relatively high prevalence and for which 10 and 29 treatments, respectively, are currently  
2 approved for use in Europe.<sup>30 43</sup> This poses the risk of widening already existing health  
3 inequities, where severe and debilitating rare conditions that affect a small number of patients  
4 do not receive the resources they need and have to rely on limited public grants.<sup>44</sup>

5 Finally, our analysis showed that patient organisations focusing on rare diseases are funded by  
6 very few companies, relying on a single payment for over 80% of their industry-reported  
7 income. Despite the share of industry contributions among the overall patient organisation's  
8 income was found to be low in the literature,<sup>11</sup> this increases the risk of pursuing the company's  
9 commercial interests rather than objectively representing a patient body.<sup>12</sup> On average, patient  
10 organisations received payments from 2.1 (SD:1.8) pharmaceutical companies, ranging from 1  
11 to a maximum of 13, which was recorded in 2020 for Genetic Alliance UK, a national charity  
12 and an alliance of over 200 patient organisations, supporting those affected by rare genetic  
13 conditions. This is aligned with findings from a recent study investigating the distribution of  
14 payments from industry to Danish patient organisations, which found that on average, most  
15 organisations were funded by 2.6 (SD:2.1) on average.<sup>15</sup>

16 These findings have important implications for policy and practice. To minimise conflicts of  
17 interests and maintain the integrity of patient organisations, particular attention should be paid  
18 to funding from companies in the immediate period before or after a patient organisation has  
19 endorsed this company's product.<sup>40</sup> One way of avoiding potential conflicts of interest is  
20 through increased transparency. Despite considerable progress on this front, especially in terms  
21 of reporting the monetary value of industry payments, there are still gaps in reporting.<sup>45</sup>  
22 Furthermore, financial independence of patient organisation is fundamental for making sure  
23 that patients' interest is at the forefront of the organisations' agenda. This is exemplified by the  
24 opposition of AbbVie-sponsored patient organizations to biosimilar switching in various  
25 countries, which underscores the potential harm of financial dependency on public health  
26 priorities.<sup>15</sup> In the long term, policymakers should make sure that patient organisations receive  
27 adequate public funding regardless of whether they focus on conditions that are profitable for  
28 the industry. Such public funding is particularly important for patient organisations supporting  
29 rare diseases, as relatively few companies have financial links with patient organisations  
30 focusing on rare diseases, potentially creating high reliance on few high-value payments.

31 This study had limitations. First, the lack of mandatory reporting of payments to patient  
32 organizations by companies that do not comply with the ABPI Code is a major limitation of  
33 our analysis.<sup>46</sup> For example, our dataset does not include payments by Vertex, a company with  
34 a rare-focused portfolio and a strong presence in cystic fibrosis.<sup>47</sup> Even for companies that are  
35 signatories of the ABPI Code, underreporting of payments to patient organizations and removal  
36 of disclosure reports from the public domain has been observed.<sup>13 48 49</sup> Although the ABPI Code  
37 requires companies to disclose their payments to patient organizations annually, it does not  
38 mandate the publication of disclosure reports from previous years on their websites.<sup>26</sup> As a  
39 result, our findings should be interpreted with caution given the incomplete nature of the  
40 available data. Linked to this we have assumed that companies which disclosed no payments  
41 in a given year, made no payments in that year. Second, the sample size of pharmaceutical  
42 companies making payments to patient organisations was not constant over time. In fact, we

1 recorded payments from 37 companies in 2018 versus 60 companies in 2020. While this might  
2 bias our results, the impact of this was considered to be limited. Most notably, despite the  
3 differences in sample size, absolute values of payments are very similar when considering only  
4 companies that consistently disclosed payments across years (n=37). For example, in 2020,  
5 payments from those companies that disclosed consistently across the study period amounted  
6 to £15.5 million versus £18 million when any payment disclosed in that year is considered  
7 (86%). Third, in our assessment of company interests, we made a conservative assumption that  
8 only patient organisations which target relatively narrow conditions were eligible to be coded  
9 as *definitely yes*. Despite this assumption, we concluded that more than half of payments were  
10 in therapeutic areas in which companies had a clear interest. Finally, our analysis focused on a  
11 recent time period (2018-2020). While previous publications show similar trends in terms of  
12 the most funded diseases and absolute value of payments,<sup>2 10</sup> lending credibility to our analysis  
13 and underlying data, it is still unclear whether these trends hold over time and their  
14 generalisability to other periods.

15 There are several avenues which can be explored further to build on this analysis. While some  
16 of the previous literature on the topic has focused on the financial dependency of patient  
17 organisations' budgets from pharmaceutical funding,<sup>11</sup> whether this differs depending on the  
18 rarity of the disease targeted has not been explored. Due to the small number of patients  
19 affected by rare conditions, patient organisations that target such conditions may be less well-  
20 equipped to finance their activities via charitable events and may rely more heavily on  
21 contributions from pharmaceutical companies. Lastly, while our analysis did not evaluate the  
22 effect of Covid-19 on the financial dynamics between pharmaceutical companies and patient  
23 organisations, we expect that the pandemic had a substantial effect on the type, value and  
24 distribution of payments. Future research should examine the impact of Covid-19 on industry  
25 funding of patient organisations.

## 26 **Conclusions**

27 Almost all industry funding of UK patient organisations between 2018 and 2020 was in areas  
28 that were aligned with companies' approved drug portfolios and research and development  
29 pipelines. Pharmaceutical companies spent a larger amount on patient organisations focusing  
30 on rare diseases and these organisations relied on a small of companies for their funding.

1  
2  
3  
4  
5  
6  
7  
8  
9  
10  
11  
12  
13  
14  
15  
16  
17  
18  
19  
20  
21  
22  
23  
24  
25  
26  
27  
28  
29  
30  
31  
32  
33  
34  
35  
36  
37  
38  
39  
40  
41  
42  
43  
44  
45  
46  
47  
48  
49  
50  
51  
52  
53  
54  
55  
56  
57  
58  
59  
60

1 **Acknowledgements:** We thank Dr Huseyin Naci and Dr Olivier Wouters, both from the  
2 Department of Health Policy at the London School of Economics and Political Science, for  
3 providing comments on earlier drafts of this paper. We also acknowledge Dr Mylene Lagarde  
4 and Dr Panos Kanavos for the support provided when finalising the manuscript.

5 **Contributors:** AG developed a preliminary version of the study and developed it further with  
6 IP. AG collected the data. AG and IP did the analysis, wrote and reviewed the manuscript. Both  
7 authors had full access to all of the data (including statistical reports and tables) in the study  
8 and can take responsibility for the integrity of the data and the accuracy of the data analysis.  
9 The corresponding author attests that all listed authors meet authorship criteria and that no  
10 others meeting the criteria have been omitted. AG is the guarantor.

11 **Funding:** This research received no specific grant from any funding agency in the public,  
12 commercial or not-for-profit sectors. AG is funded by the ESRC for her doctoral research  
13 (Project reference: 2480077) and is employed by Imperial College London. IP is funded by the  
14 ESRC for her doctoral research (Project reference: 2311285) and is employed by Imperial  
15 College London.

16 **Competing interest statement:** All authors have completed the Unified Competing Interest  
17 form (available on request from the corresponding author) and declare: no support from any  
18 organisation for the submitted work; no financial relationships with any organisations that  
19 might have an interest in the submitted work in the previous three years, no other relationships  
20 or activities that could appear to have influenced the submitted work.

21 **Ethical approval:** This study does not involve human participants and ethical approval was  
22 not required.

23 **Data sharing:** A dataset of all publicly available data used in the study is available from the  
24 corresponding author at a.gentilini@lse.ac.uk.

25 **Transparency declaration:** The lead author affirms that the manuscript is an honest, accurate,  
26 and transparent account of the study being reported; that no important aspects of the study have  
27 been omitted; and that any discrepancies from the study as planned (and, if relevant, registered)  
28 have been explained.

29 The Corresponding Author has the right to grant on behalf of all authors and does grant on  
30 behalf of all authors, an exclusive licence (or non-exclusive for government employees) on a  
31 worldwide basis to the BMJ Publishing Group Ltd to permit this article (if accepted) to be  
32 published in BMJ editions and any other BMJ PGL products and sublicences such use and  
33 exploit all subsidiary rights, as set out in our licence.

## References

1. EFPIA. EFPIA Code of Practice on the Relationships between the Pharmaceutical Industry and Patient Organisations: European Federation of Pharmaceutical Industries and Associations, 2011.
2. Ozieranski P, Rickard E, Mulinari, Shai. Exposing drug industry funding of UK patient organisations. *BMJ* 2019;365:l1806. doi: 10.1136/bmj.l1806
3. Polich GR. Rare disease patient groups as clinical researchers. *Drug Discovery Today* 2012;17(3):167-72. doi: <https://doi.org/10.1016/j.drudis.2011.09.020>
4. Geissler J, Ryll B, di Priolo SL, et al. Improving Patient Involvement in Medicines Research and Development::A Practical Roadmap. *Therapeutic Innovation & Regulatory Science* 2017;51(5):612-19. doi: 10.1177/2168479017706405
5. MHRA. Patient Involvement Strategy 2021-25: Medicines and Healthcare products Regulatory Agency 2020.
6. MHRA. Putting patients first: A new era for our agency. Delivery Plan 2021-2023: Medicines and Healthcare products Regulatory Agency 2020.
7. NICE. Public Involvement Programme - Overview of technology appraisals: A factsheet for patient and carer organisations: National Institute for Health and Care Excellence, 2014
8. Fabbri A, Parker L, Colombo C, et al. Industry funding of patient and health consumer organisations: systematic review with meta-analysis. *BMJ* 2020;368:l6925. doi: 10.1136/bmj.l6925
9. Rose SL, Highland J, Karafa MT, et al. Patient Advocacy Organizations, Industry Funding, and Conflicts of Interest. *JAMA Intern Med* 2017;177(3):344-50. doi: 10.1001/jamainternmed.2016.8443
10. Mulinari S, Vilhelmsson A, Rickard E, et al. Five years of pharmaceutical industry funding of patient organisations in Sweden: Cross-sectional study of companies, patient organisations and drugs. *PLoS One* 2020;15(6):e0235021. doi: 10.1371/journal.pone.0235021 [published Online First: 20200624]
11. Ozieranski P, Pitter JG, Rickard E, et al. A 'patient-industry complex'? Investigating the financial dependency of UK patient organisations on drug company funding. *Social Health Illn* 2022;44(1):188-210. doi: 10.1111/1467-9566.13409 [published Online First: 20211207]
12. Rose SL. Patient advocacy organizations: institutional conflicts of interest, trust, and trustworthiness. 2014(1748-720X (Electronic))
13. Lexchin J, Batt S, Goldberg D, et al. National patient groups in Canada and their disclosure of relationships with pharmaceutical companies: a cross-sectional study. *BMJ Open* 2022;12(3):e055287. doi: 10.1136/bmjopen-2021-055287
14. Parker L, Fabbri A, Grundy Q, et al. "Asset exchange"—interactions between patient groups and pharmaceutical industry: Australian qualitative study. *BMJ* 2019;367:l6694. doi: 10.1136/bmj.l6694
15. Mulinari S, Pashley D, Ozieranski P. Advancing international comparison of pharmaceutical industry funding of patient advocacy: Focus on Denmark. *Health Policy* 2022;126(12):1256-62. doi: <https://doi.org/10.1016/j.healthpol.2022.11.003>
16. Wouters OJ, McKee M, Luyten J. Estimated Research and Development Investment Needed to Bring a New Medicine to Market, 2009-2018. 2020(1538-3598 (Electronic))
17. Aymé S, Kole A, Groft S. Empowerment of patients: lessons from the rare diseases community. *Lancet* 2008;371(9629):2048-51. doi: 10.1016/s0140-6736(08)60875-2
18. Gamba S, Magazzini L, Pertile P. R&D and market size: Who benefits from orphan drug legislation? *Journal of Health Economics* 2021;80:102522. doi: <https://doi.org/10.1016/j.jhealeco.2021.102522>
19. Waxman HA. The Waxman Report : How Congress Really Works: First edition. New York : Twelve, 2009. 2009.

- 1 20. Office of the Federal Register NAARA. Orphan Drug Act - 6 Stat. 2049. In: Office. USGP, ed., 1983.
- 2 21. European Commission. Regulation (EC) No 141/2000 of the European Parliament and of the
- 3 Council of 16 December 1999 on Orphan Medicinal Products, 2000.
- 4 22. Halley MC. From "Ought" to "Is": Surfacing Values in Patient and Family Advocacy in Rare
- 5 Diseases. 2021(1536-0075 (Electronic))
- 6 23. Dunkle M, Pines W, Saltonstall PL. Advocacy Groups and Their Role in Rare Diseases Research. In:
- 7 Posada de la Paz M, Groft SC, eds. Rare Diseases Epidemiology. Dordrecht: Springer
- 8 Netherlands 2010:515-25.
- 9 24. Scottish Medicines Consortium. Patient and Clinician Engagement (PACE) process [Available
- 10 from: <https://www.scottishmedicines.org.uk/how-we-decide/pace/2023>.
- 11 25. Disclosure UK. ABPI Patient Organisations database 2021 [Available from:
- 12 <https://search.disclosureuk.org.uk/>.
- 13 26. PMCPA. ABPI Code of Practice 2021 [Available from: [https://www.pmcpa.org.uk/the-code/2021-](https://www.pmcpa.org.uk/the-code/2021-interactive-abpi-code-of-practice/)
- 14 [interactive-abpi-code-of-practice/](https://www.pmcpa.org.uk/the-code/2021-interactive-abpi-code-of-practice/).
- 15 27. ONS. Consumer price inflation time series: Office for National Statistics; 2022 [Available from:
- 16 <https://www.ons.gov.uk/economy/inflationandpriceindices/timeseries/I55o/mm23>.
- 17 28. HMRC. HMRC yearly average and spot rates: HM Revenue and Customs; [Available from:
- 18 <https://www.gov.uk/government/publications/exchange-rates-for-customs-and-vat-yearly>.
- 19 29. HMRC. HMRC yearly average and spot rates: HM Revenue and Customs; 2022 [Available from:
- 20 <https://www.gov.uk/government/publications/exchange-rates-for-customs-and-vat-yearly>.
- 21 30. Orphanet. The portal for rare diseases and orphan drugs 2022 [Available from:
- 22 [https://www.orpha.net/consor/cgi-bin/Disease\\_Search\\_Simple.php?Ing=EN](https://www.orpha.net/consor/cgi-bin/Disease_Search_Simple.php?Ing=EN).
- 23 31. Rothman SM, Raveis VH, Friedman A, et al. Health Advocacy Organizations and the
- 24 Pharmaceutical Industry: An Analysis of Disclosure Practices. *American Journal of Public*
- 25 *Health* 2011;101(4):602-09. doi: 10.2105/AJPH.2010.300027
- 26 32. European Medicines Agency. Criteria to be fulfilled by patient, consumer and healthcare
- 27 professional organisations involved in European Medicines Agency (EMA) activities 2018
- 28 [Available from: [https://www.ema.europa.eu/en/documents/regulatory-procedural-](https://www.ema.europa.eu/en/documents/regulatory-procedural-guideline/criteria-be-fulfilled-patient-consumer-healthcare-professional-organisations-involved-european_en.pdf)
- 29 [guideline/criteria-be-fulfilled-patient-consumer-healthcare-professional-organisations-](https://www.ema.europa.eu/en/documents/regulatory-procedural-guideline/criteria-be-fulfilled-patient-consumer-healthcare-professional-organisations-involved-european_en.pdf)
- 30 [involved-european\\_en.pdf](https://www.ema.europa.eu/en/documents/regulatory-procedural-guideline/criteria-be-fulfilled-patient-consumer-healthcare-professional-organisations-involved-european_en.pdf).
- 31 33. NICE. Policy on declaring and managing interests for NICE advisory committees, 2018.
- 32 34. WHO. ICD-11 for Mortality and Morbidity Statistics 2022 [Available from:
- 33 <https://icd.who.int/browse11/l-m/en#/http://id.who.int/icd/entity/465177735?view=G0>.
- 34 35. NIH U.S. National Library of Medicine. ClinicalTrials.gov [Available from:
- 35 <https://clinicaltrials.gov/2022>.
- 36 36. Ozieranski P, Csanadi M, Rickard E, et al. Analysis of Pharmaceutical Industry Payments to UK
- 37 Health Care Organizations in 2015. 2019(2574-3805 (Electronic))
- 38 37. Hughes DA, Poletti-Hughes J. Profitability and Market Value of Orphan Drug Companies: A
- 39 Retrospective, Propensity-Matched Case-Control Study. 2016(1932-6203 (Electronic))
- 40 38. McCoy MS, Carniol M, Chockley K, et al. Conflicts of Interest for Patient-Advocacy Organizations.
- 41 *New England Journal of Medicine* 2017;376(9):880-85. doi: 10.1056/NEJMSr1610625
- 42 39. Jones K. In whose interest? Relationships between health consumer groups and the
- 43 pharmaceutical industry in the UK. 2008(1467-9566 (Electronic))
- 44 40. Mandeville KL, Barker R, Packham A, et al. Financial interests of patient organisations
- 45 contributing to technology assessment at England's National Institute for Health and Care
- 46 Excellence: policy review. *BMJ* 2019;364:k5300. doi: 10.1136/bmj.k5300
- 47 41. Mavris M, Le Cam Y. Involvement of patient organisations in research and development of
- 48 orphan drugs for rare diseases in europe. 2012(1661-8769 (Print))
- 49 42. Bedlington N, Geissler J, Houyez F, et al. Role of Patient Organisations. In: Facey KM, Ploug
- 50 Hansen H, Single ANV, eds. Patient Involvement in Health Technology Assessment.
- 51 Singapore: Springer Singapore 2017:401-10.

- 1  
2  
3 1 43. European Medicines Agency. European public assessment reports (EPAR), 2022.  
4 2 44. Baggott R, Jones K. The Big Society in an age of austerity: threats and opportunities for Health  
5 3 Consumer and Patients' Organizations in England. 2015(1369-7625 (Electronic))  
6 4 45. Lexchin J. Association between commercial funding of Canadian patient groups and their views  
7 5 about funding of medicines: An observational study. *PLOS ONE* 2019;14(2):e0212399. doi:  
8 6 10.1371/journal.pone.0212399  
9 7 46. Ozieranski P, Martinon L, Jachiet P-A, et al. Accessibility and quality of drug company disclosures  
10 8 of payments to healthcare professionals and organisations in 37 countries: a European policy  
11 9 review. *BMJ Open* 2021;11(12):e053138. doi: 10.1136/bmjopen-2021-053138  
12 10 47. Vertex Pharmaceuticals Incorporated. Our Science [Available from: [https://www.vrtx.com/our-](https://www.vrtx.com/our-science/2023)  
13 11 [science/2023](https://www.vrtx.com/our-science/2023).  
14 12 48. Ozieranski P, Csanádi M, Rickard E, et al. Under-reported relationship: a comparative study of  
15 13 pharmaceutical industry and patient organisation payment disclosures in the UK (2012–  
16 14 2016). *BMJ Open* 2020;10(9):e037351. doi: 10.1136/bmjopen-2020-037351  
17 15 49. Colombo C, Mosconi P, Villani W, et al. Patient organizations' funding from pharmaceutical  
18 16 companies: is disclosure clear, complete and accessible to the public? An Italian survey. *PLoS*  
19 17 *One* 2012;7(5):e34974. doi: 10.1371/journal.pone.0034974 [published Online First:  
20 18 20120509]  
21  
22  
23  
24 19  
25  
26 20  
27  
28  
29  
30  
31  
32  
33  
34  
35  
36  
37  
38  
39  
40  
41  
42  
43  
44  
45  
46  
47  
48  
49  
50  
51  
52  
53  
54  
55  
56  
57  
58  
59  
60

1  
2  
3 1 **Figure legend**  
4

5 2 **Figure 1.** Classification model to determine company interests in patient organisation funding  
6 3 Note: An interest is when there is, or could be perceived to be, an opportunity for a  
7 4 pharmaceutical company to benefit in the disease area where the patient organisation operates.  
8

9  
10 5 **Figure 2.** Cumulative value of payments by receiving patient organisation and funding  
11 6 company from 2018-2020  
12

13 7 **Figure 3.** Cumulative value of payments by patient organisation type and therapeutic area  
14 8 from 2018-2020  
15  
16  
17  
18  
19  
20  
21  
22  
23  
24  
25  
26  
27  
28  
29  
30  
31  
32  
33  
34  
35  
36  
37  
38  
39  
40  
41  
42  
43  
44  
45  
46  
47  
48  
49  
50  
51  
52  
53  
54  
55  
56  
57  
58  
59  
60

For peer review only

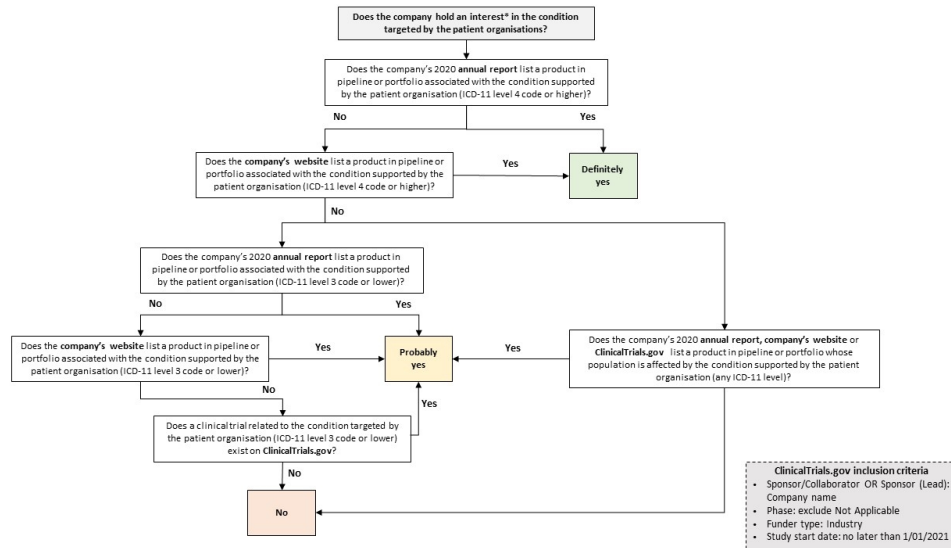

Caption: Classification model to determine company interests in patient organisation funding

Notes: An interest is when there is, or could be perceived to be, an opportunity for a pharmaceutical company to benefit in the disease area where the patient organisation operates.

338x190mm (96 x 96 DPI)



1  
2  
3  
4  
5  
6  
7  
8  
9  
10  
11  
12  
13  
14  
15  
16  
17  
18  
19  
20  
21  
22  
23  
24  
25  
26  
27  
28  
29  
30  
31  
32  
33  
34  
35  
36  
37  
38  
39  
40  
41  
42  
43  
44  
45  
46  
47  
48  
49  
50  
51  
52  
53  
54  
55  
56  
57  
58  
59  
60

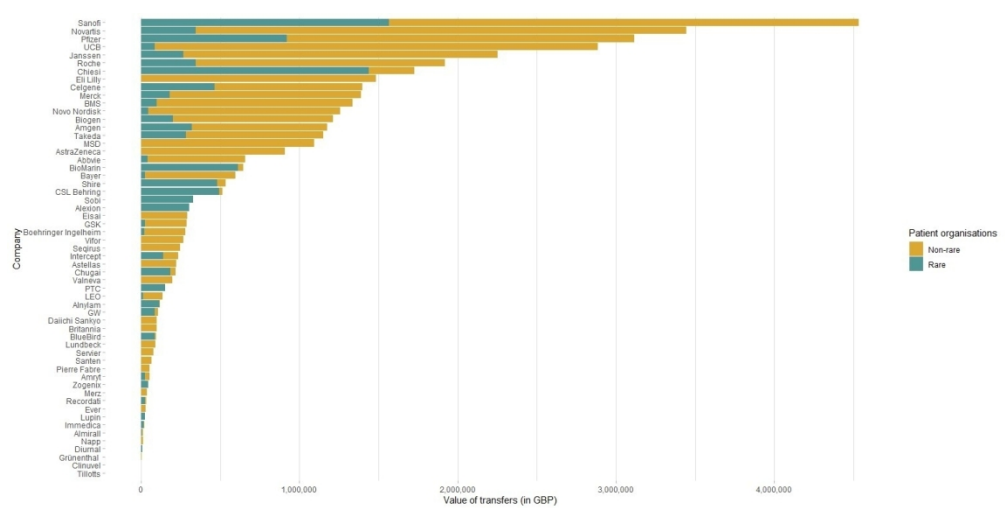

Caption: Cumulative value of payments by receiving patient organisation and funding company from 2018-2020

130x64mm (300 x 300 DPI)

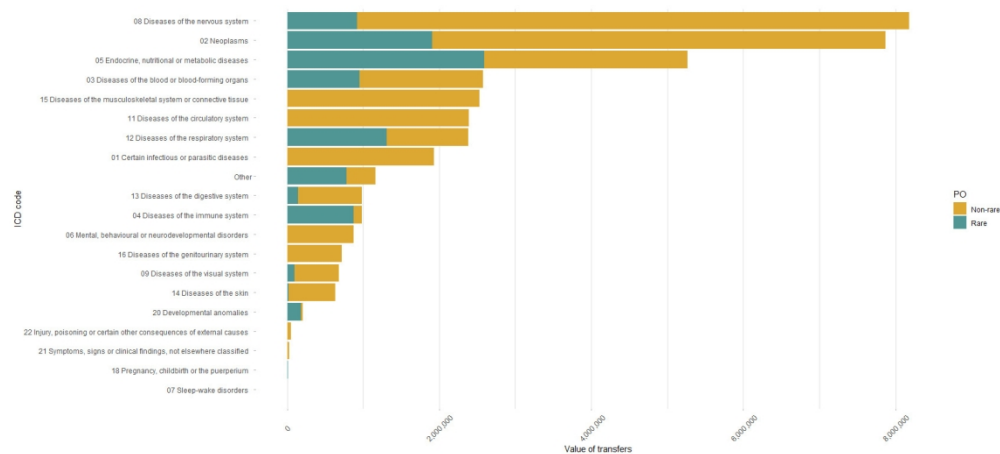

Caption: Cumulative value of payments by patient organisation type and therapeutic area from 2018-2020

1161x525mm (37 x 37 DPI)

## 1 Supplemental Material

### 2 Data collection

#### 3 Payments

4 Data on payments from pharmaceutical companies to POs from 2018 to 2020 were retrieved  
5 in January 2022 from the Disclosure UK patient organisation gateway.<sup>1</sup> The gateway was  
6 launched in 2020 and is a collection of hyperlinks to companies' disclosure of payments to  
7 patient organisations. Disclosing financial payments to patient organisations is a requirement  
8 of Clause 29 of the Association of British Pharmaceutical Industry (ABPI) Code of Practice.<sup>2</sup>  
9 However, companies signed up to abide by the ABPI Code, accepting the jurisdiction of the  
10 Prescription Medicines Code of Practice Authority (code regulator) extends beyond those who  
11 are ABPI members and is expected to include most pharmaceutical companies operative in the  
12 UK. We screened the websites of all pharmaceutical companies abiding by the ABPI Code,  
13 most of which provided a link in listed in the Disclosure UK database, and retrieved payments  
14 information companies' websites to ensure all payments were captured. If payments were not  
15 disclosed in Disclosure UK nor in the company's website, the company was assumed not to  
16 have made any payment to patient organisations in that year(s).

17 AG extracted payment disclosures from companies' websites, comprising of the name of the  
18 patient organisation, the year in which the payment was made, the reason why it was made and  
19 its value. Given that a consolidated database of payments was not available and payments  
20 needed to be manually compiled from each individual company's website, IP randomly  
21 checked 30% of payments to validate the data collection process and minimise the risk of  
22 reporting errors.

23 All payments were first adjusted for inflation using the ONS Consumer Price Index <sup>3</sup> and then  
24 converted to British Pounds (GBP), using the ONS historical yearly conversion rates.<sup>4 5</sup> All  
25 payments are in 2020 GBP. Data on pharmaceutical companies' portfolio and pipeline were  
26 retrieved from their latest annual report, company website and ClinicalTrials.gov,<sup>6</sup> in order of  
27 screening.

#### 28 Therapeutic areas

29 Patient organisations' websites were also screened to understand the condition(s) they focused  
30 on. For example, in the case of *Blood Cancer UK*, their mission is to "beat blood cancer",  
31 therefore, the condition supported was coded as blood cancer.

32 After being identified as described above, conditions were further classified into rare and non-  
33 rare.

34 Conditions were considered rare if they appeared in the Orphanet database of rare diseases  
35 regardless of their classification level (group of disorders, disorders or subtypes of disorders).<sup>9</sup>  
36 For example, multiple myeloma appears in the Orphanet database of rare diseases, therefore a  
37 patient organisation focusing this condition would be categorised as rare-focused. When  
38 condition sub-types appeared in the Orphanet database, the patient organisation's website was

1 screened to check whether its focus was on rare conditions. For example, *Metabolic Support*  
 2 *UK's* motto is “*Your rare condition. Our common fight*” and was therefore assumed to be rare  
 3 disease-focused. Conversely, should a patient organisation focus on a broader condition such  
 4 as blood cancer with no sole focus on rare conditions, the organisation would be conservatively  
 5 considered non-rare. While this approach was preferred as it did not require further  
 6 assumptions, it entails that only more specialised patient organisation are considered as rare.  
 7 Such approach might have led to the number and overall value of payments from  
 8 pharmaceutical companies to rare diseases-focused patient organisations being underestimated,  
 9 as these organisations are expected to get less payments than more generalist ones (e.g. multiple  
 10 myeloma vs blood cancer).

11 A third category (*unclear*) was created for non-disease-specific patient organisations, such as  
 12 coalition of charities or organisations focused on palliative care for terminally ill patients. This  
 13 category was excluded from the main analyses, but sub-group analyses are reported at the end  
 14 of the Supplemental Material.

### 15 **Companies' interest**

16 We developed a methodology to assess the extent to which a pharmaceutical company holds  
 17 an interest in the disease supported by a patient organisation. For the purpose of this analysis,  
 18 we adapted the definition of interest provided by NICE.<sup>11</sup> An interest is when there is, or could  
 19 be perceived to be, an opportunity for a pharmaceutical company to benefit in the disease area  
 20 where the patient organisation operates. This could include situations where the pharmaceutical  
 21 company has a drug developed or in development for a condition supported by the patient  
 22 organisation, or where a drug in the company's portfolio or pipeline is restricted to a specific  
 23 population affected by the disease supported by the patient organisation.

24 As first step, the conditions supported by patient organisations were translated into ICD-11  
 25 codes using the online ICD-11 database.<sup>12</sup>

26 ICD-11 codes are mutually exclusive, exhaustive and are arranged as a single hierarchical tree.  
 27 This means that specific diseases are nested within broader classifications. An example for  
 28 multiple myeloma is shown in Table 1 below.

29  
 30 **Table 1. Example of ICD-11 classification, Multiple myeloma**

| Hierarchy level | Condition                                       | ICD-11 code |
|-----------------|-------------------------------------------------|-------------|
| Level 1         | Neoplasms                                       | 2           |
| Level 2         | Neoplasms of haematopoietic or lymphoid tissues | 2A          |
| Level 3         | Mature B-cell neoplasms                         | 2A8         |
| Level 4         | Plasma cell neoplasms                           | 2A83        |
| Level 5         | Plasma cell myeloma                             | 2A83.1      |

31  
 32 In this example, multiple myeloma is nested within *Plasma cell myeloma*, who is in its turn  
 33 nested within *Plasma cell neoplasms* and so on up to *Neoplasms*.

Subsequently, companies' annual reports, website and the ClinicalTrials.gov database were searched to assess whether the each company had an interest in the condition supported by the patient organisation receiving the payment. The diagram in the main document (Figure 1) schematically illustrates the approach taken to understand whether the company definitely, probably or did not have an interest in the condition. Figure 1 below illustrates the source of companies' interests.

For example, if *Company X* reports in its annual report having a drug in development for multiple myeloma and transferred a sum of money to *Blood Cancer UK*, this would be coded as *probably yes*, as the company has a product in its pipeline or portfolio associated with a condition supported by the patient organisation. In this case, the ICD-11 level would be 2, *Neoplasms of haematopoietic or lymphoid tissue*, under which multiple myeloma is nested. Conversely, should *Company X* have made a payment to *Myeloma UK*, this would have been coded as *definitely yes*, as there is perfect alignment between the condition supported by the patient organisation and by *Company X's* drug.

Situations where a company's interest in a certain condition could not be identified indicate an impossibility of identifying such link, rather than the lack thereof.

**Figure 1. Source of companies interests**

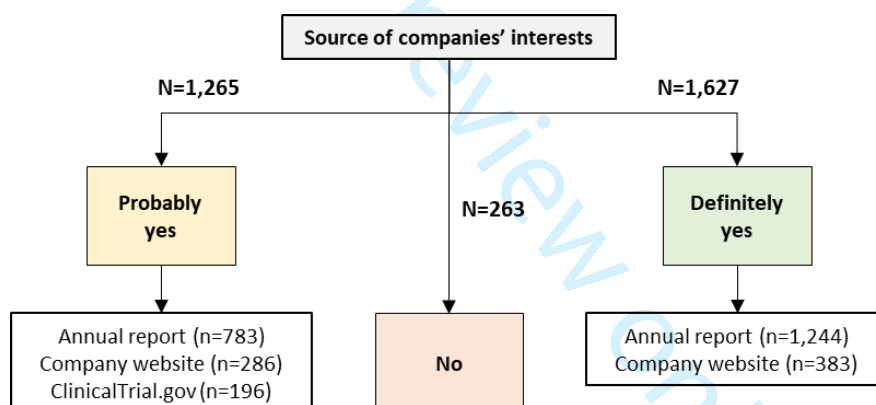

## 1 Variables cleaning and coding

2 Table 2. Description of key variables in payment database

| Variables name       | Description                                                                                 | Details                                                                                                                                                                                                                                                                                                                                                                                                                                                                                                                                                                                                                                                                                                                                                     |
|----------------------|---------------------------------------------------------------------------------------------|-------------------------------------------------------------------------------------------------------------------------------------------------------------------------------------------------------------------------------------------------------------------------------------------------------------------------------------------------------------------------------------------------------------------------------------------------------------------------------------------------------------------------------------------------------------------------------------------------------------------------------------------------------------------------------------------------------------------------------------------------------------|
| Company              | Standardised company name                                                                   | Company name as reported on company website.<br>During our study period (2018-2020), two mergers were observed among the companies included in the analysis: BMS and Celgene, and Takeda and Shire. Although these companies had merged, we treated them as separate entities because their disclosures were reported separately even after the acquisition.                                                                                                                                                                                                                                                                                                                                                                                                |
| ABPI member          | ABPI membership of company;<br><i>source: <a href="#">ABPI full members list</a></i>        | 0 = not ABPI member, 1 = ABPI member                                                                                                                                                                                                                                                                                                                                                                                                                                                                                                                                                                                                                                                                                                                        |
| Company_condition    | Concatenation of company name and disease area targeted by the patient organisation         | Concatenation used for coding and analysis purposes                                                                                                                                                                                                                                                                                                                                                                                                                                                                                                                                                                                                                                                                                                         |
| Company interest     | Whether the company hold an interest* in the condition targeted by the patient organisation | <ul style="list-style-type: none"> <li>- <b>Definitely yes:</b> the company's annual report or website list a product for the condition targeted by the patient organisation in its portfolio/pipeline (ICD-11 level 4 or above)</li> <li>- <b>Probably yes:</b> the company's annual report or website list a product for the condition targeted by the patient organisation in its portfolio/pipeline OR a clinical trial for which the company is sponsor is listed for the disease targeted by the patient organisation OR a drug in the company's pipeline/portfolio is restricted to a specific population affected by the disease targeted by the patient organisation (ICD-11 level 3 or below)</li> <li>- <b>No :</b> None of the above</li> </ul> |
| Source               | Source of company interest variable                                                         | Annual report, company website, ClinicalTrials.gov, none                                                                                                                                                                                                                                                                                                                                                                                                                                                                                                                                                                                                                                                                                                    |
| Name of PO           | Name of patient organization as reported by companies in disclosure report                  | -                                                                                                                                                                                                                                                                                                                                                                                                                                                                                                                                                                                                                                                                                                                                                           |
| Standardised PO name | Standardised name of patient organization to avoid duplicates and inconsistencies           | For coding purposes, names of patient organisations were standardised. The following steps were taken: <ol style="list-style-type: none"> <li>1. Patient organisations' names for typos, abbreviations, spelling mistakes and duplicated within the companies' disclosures (e.g. Crohn's &amp; Colitis UK and CCUK would both be standardized to Crohn's and Colitis UK);</li> <li>2. If the patient organisation changed name over time, the latest name on record was used;</li> </ol>                                                                                                                                                                                                                                                                    |

|                                                   |                                                                                                                                                                                                                                                                |                                                                                                                                                                                                                                                                                                                                                                                                                                                                                                                                          |
|---------------------------------------------------|----------------------------------------------------------------------------------------------------------------------------------------------------------------------------------------------------------------------------------------------------------------|------------------------------------------------------------------------------------------------------------------------------------------------------------------------------------------------------------------------------------------------------------------------------------------------------------------------------------------------------------------------------------------------------------------------------------------------------------------------------------------------------------------------------------------|
|                                                   |                                                                                                                                                                                                                                                                | <ol style="list-style-type: none"> <li>3. If the two patient organisations merged over the study period, the name of the merged entity was used (e.g. the British Lung Foundation and Asthma UK merged into Asthma + Lung UK);</li> <li>4. Separate entries were made for patient organisations under the same umbrella but focusing on different geographical entities (e.g. Alzheimer UK vs Alzheimer Scotland)</li> </ol>                                                                                                             |
| <b>Reason for exclusion</b>                       | Reason why the organisation was excluded from the analysis                                                                                                                                                                                                     | <ul style="list-style-type: none"> <li>- Not UK organisation (not aligned with geographical scope e.g. Irish, US-based);</li> <li>- For profit company (not aligned with definition of patient organization used in the study);</li> <li>- Missing information (organisations for whose nature is unclear i.e. patient organisation website could not be identified)</li> </ul>                                                                                                                                                          |
| <b>ICD-11</b>                                     | Classification of disease targeted by the patient organisation according to the WHO ICD-11; <i>source: <a href="#">ICD WHO website</a></i>                                                                                                                     | General classification (ICD-11 chapters)<br><i>See Excel file, Inputs tab</i>                                                                                                                                                                                                                                                                                                                                                                                                                                                            |
| <b>Condition</b>                                  | Condition targeted by patient organisation as reported on website                                                                                                                                                                                              | e.g. Blood Cancer UK would fall under ICD-11 code 02 Neoplasms, with <i>blood cancer</i> being the condition                                                                                                                                                                                                                                                                                                                                                                                                                             |
| <b>Charity number (if any)</b>                    | Charity number as reported in the organization website or as reported in the <a href="#">England and Wales Charity Commission website</a>                                                                                                                      | When both England/Wales and Scotland or Northern Ireland charity numbers were provided, the former was chosen. Scotland and Northern Ireland charity numbers were reported only when those for England/Wales were missing                                                                                                                                                                                                                                                                                                                |
| <b>Company number (if charity number missing)</b> | Company number as reported in the organization website or as reported in the <a href="#">Government Company Information Service website</a> if the patient organization cannot be found in the charity commission database (e.g. limited by guarantee company) | When both England/Wales and Scotland or Northern Ireland charity numbers were provided, the former was chosen. Scotland and Northern Ireland charity numbers were reported only when those for England/Wales were missing                                                                                                                                                                                                                                                                                                                |
| <b>Link</b>                                       | Link of patient organisation website                                                                                                                                                                                                                           | -                                                                                                                                                                                                                                                                                                                                                                                                                                                                                                                                        |
| <b>Rare disease</b>                               | Whether the condition or one of the conditions targeted by the patient organisation is considered as rare                                                                                                                                                      | <p>A condition was considered as rare if it under at least one of the following criteria:</p> <ol style="list-style-type: none"> <li>1. The condition is listed in <a href="#">Orphanet list of rare diseases</a> regardless of its ICD-11 level classification;</li> <li>2. In their website, the patient organisation explicitly describe the disease they target as rare (e.g. <i>Metabolic Support UK's</i> motto is “<i>Your rare condition. Our common fight</i>” and was therefore assumed to be rare disease-focused)</li> </ol> |

|                             |                                                                                     |                                                                                                           |
|-----------------------------|-------------------------------------------------------------------------------------|-----------------------------------------------------------------------------------------------------------|
| <b>Details of payment</b>   | Details of payment as reported by companies in disclosure report                    | -                                                                                                         |
| <b>Country</b>              | Country of payment                                                                  | The country considered for the entire database is the UK                                                  |
| <b>Year</b>                 | Year of payment                                                                     | 2018, 2019, 2020                                                                                          |
| <b>Currency</b>             | Currency of payment                                                                 | Currency the payment is reported in the disclosure reports (i.e. EUR, GBP, USD, CHF, SEK, NKK)            |
| <b>Currency_year</b>        | Concatenation of currency and year of payment for conversion purposes               | -                                                                                                         |
| <b>Value of payment</b>     | Value of payment in original currency as reported by companies in disclosure report | In-kind payments were removed from the analysis as no monetary value could be associated to such payments |
| <b>Value in 2020 pounds</b> | GBP converted and inflation adjusted value of payment                               | See details in <i>Inputs</i> sheet                                                                        |

\*An interest is when there is, or could be perceived to be, an opportunity for a pharmaceutical company to benefit in the disease area where the patient organisation operates.



## 1 Disclosure details

2 Table 3. Disclosure details for companies disclosing at least one payment between 2018-2020

| Company              | 2018 | 2019 | 2020 | Years of complete data |
|----------------------|------|------|------|------------------------|
| AbbVie               | 0    | 1    | 1    | 2                      |
| Alexion              | 1    | 1    | 1    | 3                      |
| ALK-Abello           | 0    | 0    | 1    | 1                      |
| Amirall              | 0    | 1    | 1    | 2                      |
| Alnylam              | 1    | 1    | 1    | 3                      |
| Amgen                | 1    | 1    | 1    | 3                      |
| Amicus Therapeutics  | 1    | 1    | 1    | 3                      |
| Amryt                | 0    | 1    | 1    | 2                      |
| Astellas             | 1    | 1    | 1    | 3                      |
| AstraZeneca          | 1    | 1    | 1    | 3                      |
| Bayer                | 1    | 1    | 1    | 3                      |
| Biogen               | 1    | 1    | 1    | 3                      |
| BioMarin             | 1    | 1    | 1    | 3                      |
| BlueBirdBio          | 0    | 0    | 1    | 1                      |
| Boehringer Ingelheim | 1    | 1    | 1    | 3                      |
| BMS                  | 1    | 1    | 1    | 3                      |
| Britannia            | 1    | 1    | 1    | 3                      |
| Camurus              | 0    | 0    | 1    | 1                      |
| Celgene              | 1    | 1    | 1    | 3                      |
| Chiesi               | 1    | 1    | 1    | 3                      |
| Chugai               | 1    | 1    | 1    | 3                      |
| Clinovel             | 0    | 0    | 1    | 1                      |
| CSL Behring          | 1    | 1    | 1    | 3                      |
| Daiichi Sankyo       | 1    | 1    | 1    | 3                      |
| Diurnal              | 0    | 0    | 1    | 1                      |
| Dr Falk Pharma UK    | 1    | 1    | 1    | 3                      |
| Eisai                | 1    | 1    | 1    | 3                      |
| EliLilly             | 1    | 1    | 1    | 3                      |
| Ever Pharma          | 0    | 1    | 1    | 2                      |
| GSK                  | 0    | 0    | 1    | 1                      |
| Grünenthal           | 0    | 0    | 1    | 1                      |
| GW Pharma            | 0    | 1    | 1    | 2                      |
| Immedica             | 0    | 0    | 1    | 1                      |
| Indivior             | 0    | 0    | 1    | 1                      |
| Intercept Pharma     | 1    | 1    | 1    | 3                      |
| Janssen              | 1    | 1    | 1    | 3                      |
| Jazz Pharma          | 0    | 0    | 1    | 1                      |
| LEO Pharma           | 1    | 1    | 1    | 3                      |
| Lundbeck             | 0    | 1    | 1    | 2                      |
| Lupin Healthcare     | 0    | 0    | 1    | 1                      |
| Merck                | 1    | 1    | 1    | 3                      |
| MSD                  | 1    | 1    | 1    | 3                      |

|                      |   |   |   |   |
|----------------------|---|---|---|---|
| Merz Pharma          | 1 | 1 | 1 | 3 |
| Napp Pharma          | 1 | 1 | 1 | 3 |
| Norgine              | 1 | 1 | 1 | 3 |
| Novartis             | 1 | 1 | 1 | 3 |
| Novo Nordisk         | 1 | 1 | 1 | 3 |
| Otsuka Pharma        | 1 | 1 | 1 | 3 |
| Pfizer               | 1 | 1 | 1 | 3 |
| Pierre Fabre         | 0 | 1 | 1 | 2 |
| PTC Therapeutics     | 0 | 0 | 1 | 1 |
| Recordati            | 1 | 1 | 1 | 3 |
| Rosemont Pharma      | 0 | 0 | 1 | 1 |
| Sanofi Aventis       | 1 | 1 | 1 | 3 |
| Santen               | 1 | 1 | 1 | 3 |
| Seqirus              | 1 | 1 | 1 | 3 |
| Servier Laboratories | 1 | 1 | 1 | 3 |
| Shire                | 0 | 1 | 1 | 2 |
| Sobi                 | 0 | 1 | 1 | 2 |
| Takeda               | 1 | 1 | 1 | 3 |
| Tillotts             | 0 | 0 | 1 | 1 |
| UCB Pharma           | 1 | 1 | 1 | 3 |
| Valneva              | 1 | 1 | 1 | 3 |
| Vifor                | 1 | 1 | 1 | 3 |
| Zogenix              | 0 | 0 | 1 | 1 |

Notes: Please note that the table above includes the list of all companies whose disclosure reports were analysed, regardless of whether their payments were included in the analysis or not.

**Table 4. Value of included payments by company and year**

| Company              | 2018        | 2019        | 2020        | 3 years of complete data |
|----------------------|-------------|-------------|-------------|--------------------------|
| Abbvie               |             | £441,596.70 | £371,502.90 | 0                        |
| Alexion              | £82,861.81  | £58,253.76  | £168,925.00 | 1                        |
| Almirall             |             | £2,034.00   | £9,775.00   | 0                        |
| Alnylam              | £12,565.37  | £55,858.20  | £51,559.00  | 1                        |
| Amgen                | £477,826.70 | £420,997.30 | £347,757.00 | 1                        |
| Amryt                |             | £6,635.93   | £45,412.77  | 0                        |
| Astellas             | £54,440.01  | £74,241.00  | £94,583.00  | 1                        |
| AstraZeneca          | £234,564.10 | £431,878.80 | £326,201.00 | 1                        |
| BMS                  | £373,025.40 | £497,369.10 | £517,081.80 | 1                        |
| Bayer                | £263,950.80 | £182,510.80 | £171,758.00 | 1                        |
| BioMarin             |             | £246,543.20 | £411,912.00 | 0                        |
| Biogen               | £366,326.70 | £181,532.60 | £663,141.80 | 1                        |
| BlueBird             |             |             | £94,000.00  | 0                        |
| Boehringer Ingelheim | £141,615.90 | £98,230.17  | £79,762.15  | 1                        |
| Britannia            | £47,763.40  | £15,683.16  | £35,000.00  | 1                        |
| CSL Behring          | £107,455.30 | £253,944.90 | £152,192.00 | 1                        |
| Camurus              |             |             | £13,168.40  | 0                        |
| Celgene              | £683,943.50 | £403,683.40 | £310,329.00 | 1                        |

|    |                                                                         |               |               |               |             |
|----|-------------------------------------------------------------------------|---------------|---------------|---------------|-------------|
| 1  |                                                                         |               |               |               |             |
| 2  |                                                                         |               |               |               |             |
| 3  | <b>Chiesi</b>                                                           | £574,635.90   | £600,908.70   | £602,259.00   | 1           |
| 4  | <b>Chugai</b>                                                           | £27,476.80    | £127,523.70   | £62,092.00    | 1           |
| 5  | <b>Clinuvel</b>                                                         |               |               | £1,000.00     | 0           |
| 6  | <b>Daiichi Sankyo</b>                                                   | £11,298.87    | £29,427.36    | £57,879.46    | 1           |
| 7  | <b>Diurnal</b>                                                          |               |               | £6,000.00     | 0           |
| 8  | <b>Eisai</b>                                                            | £13,333.69    | £89,826.69    | £476,271.00   | 1           |
| 9  | <b>Eli Lilly</b>                                                        | £313,108.10   | £299,519.70   | £874,288.00   | 1           |
| 10 | <b>Ever</b>                                                             |               | £13,195.87    | £18,933.61    | 0           |
| 11 | <b>GSK</b>                                                              |               |               | £325,410.00   | 0           |
| 12 | <b>GW</b>                                                               |               | £8,898.75     | £98,788.00    | 0           |
| 13 | <b>Grünenthal</b>                                                       |               |               | £4,200.00     | 0           |
| 14 | <b>Immedica</b>                                                         |               |               | £19,954.00    | 0           |
| 15 | <b>Indivior</b>                                                         |               |               | £1,200.00     | 0           |
| 16 | <b>Intercept</b>                                                        | £80,498.28    | £79,988.07    | £71,711.50    | 1           |
| 17 | <b>Janssen</b>                                                          | £383,157.00   | £780,235.30   | £1,170,768.00 | 1           |
| 18 | <b>LEO</b>                                                              | £48,362.25    | £69,635.01    | £78,633.00    | 1           |
| 19 | <b>Lundbeck</b>                                                         |               | £325.44       | £89,400.00    | 0           |
| 20 | <b>Lupin</b>                                                            |               |               | £24,000.00    | 0           |
| 21 | <b>MSD</b>                                                              | £455,992.00   | £296,647.70   | £537,631.80   | 1           |
| 22 | <b>Merck</b>                                                            | £386,664.70   | £306,852.60   | £763,885.00   | 1           |
| 23 | <b>Merz</b>                                                             | £6,091.12     | £1,645.51     | £31,114.00    | 1           |
| 24 | <b>Napp</b>                                                             | £19,644.63    | £4,240.89     | £8,000.00     | 1           |
| 25 | <b>Novartis</b>                                                         | £1,096,753.00 | £983,145.00   | £1,442,037.00 | 1           |
| 26 | <b>Novo Nordisk</b>                                                     | £379,440.70   | £569,074.40   | £452,113.20   | 1           |
| 27 | <b>PTC</b>                                                              |               |               | £151,433.00   | 0           |
| 28 | <b>Pfizer</b>                                                           | £1,007,704.00 | £1,092,337.00 | £1,360,510.00 | 1           |
| 29 | <b>Pierre Fabre</b>                                                     |               | £4,652.02     | £50,010.00    | 0           |
| 30 | <b>Recordati</b>                                                        | £2,567.93     | £13,932.90    | £14,500.00    | 1           |
| 31 | <b>Roche</b>                                                            | £602,260.60   | £368,736.60   | £1,169,578.00 | 1           |
| 32 | <b>Rosemont</b>                                                         |               |               | £200.00       | 0           |
| 33 | <b>Sanofi</b>                                                           | £1,426,376.00 | £1,939,009.00 | £1,262,802.00 | 1           |
| 34 | <b>Santen</b>                                                           | £14,736.81    | £13,800.69    | £38,170.00    | 1           |
| 35 | <b>Seqirus</b>                                                          | £162,049.20   | £157,635.00   | £105,000.00   | 1           |
| 36 | <b>Servier</b>                                                          | £7,098.03     | £55,834.20    | £17,162.87    | 1           |
| 37 | <b>Shire</b>                                                            |               | £23,970.69    | £555,244.40   | 0           |
| 38 | <b>Sobi</b>                                                             |               | £194,693.30   | £132,988.00   | 0           |
| 39 | <b>Takeda</b>                                                           | £412,112.60   | £361,158.90   | £420,548.50   | 1           |
| 40 | <b>Tillotts</b>                                                         |               |               | £830.00       | 0           |
| 41 | <b>UCB</b>                                                              | £493,715.70   | £912,466.50   | £1,493,896.00 | 1           |
| 42 | <b>Valneva</b>                                                          | £56,573.44    | £82,380.05    | £59,512.00    | 1           |
| 43 | <b>Vifor</b>                                                            | £105,724.50   | £193,389.20   | £58,082.50    | 1           |
| 44 | <b>Zogenix</b>                                                          |               |               | £43,625.00    | 0           |
| 45 | <b>N</b>                                                                | 37            | 47            | 60            | 37          |
| 46 | <b>Payment Reporting Companies - All Years/At Least One Payment (%)</b> | 61% (37/60)   | 78% (47/60)   | 100% (60/60)  | 61% (37/60) |
| 47 |                                                                         |               |               |               |             |
| 48 |                                                                         |               |               |               |             |
| 49 |                                                                         |               |               |               |             |
| 50 |                                                                         |               |               |               |             |
| 51 |                                                                         |               |               |               |             |
| 52 |                                                                         |               |               |               |             |
| 53 |                                                                         |               |               |               |             |
| 54 |                                                                         |               |               |               |             |
| 55 |                                                                         |               |               |               |             |
| 56 |                                                                         |               |               |               |             |
| 57 |                                                                         |               |               |               |             |
| 58 |                                                                         |               |               |               |             |
| 59 |                                                                         |               |               |               |             |
| 60 |                                                                         |               |               |               |             |

|                                                                         |                            |                       |                        |                            |
|-------------------------------------------------------------------------|----------------------------|-----------------------|------------------------|----------------------------|
| <b>Value of Companies Payments - All Years/At Least One Payment (%)</b> | 100%<br>(£10.9 /£10.9 mln) | 93%<br>(£12.1/13 mln) | 86%<br>(£15.5/£18 mln) | 100%<br>(£10.9 /£10.9 mln) |
|-------------------------------------------------------------------------|----------------------------|-----------------------|------------------------|----------------------------|

Notes: This table displays the total included payments by company in 2020 GBP. Empty cells indicate a company/year for which no disclosure report was found. The *N* row indicates the number of companies reporting payment in each year included in the analysis. The row *Payment Reporting Companies - All Years/At Least One Payment (%)* shows the percentage of companies that disclosed payments in a given year out of the total number of companies that disclosed at least one payment across all years. For example, in 2019, 47 out of 60 companies disclosed a payment (78%). The final row, *Value of Companies Payments - All Years/At Least One Payment (%)*, indicates the percentage of the value of payments from companies reporting payment consistently across all years over the value of payments from companies reporting at least one payment. For example, in 2019, payments from companies that disclosed consistently across the study period amounted to £12,103,534 compared to £13,046,079 when any payment disclosed in that year is considered (93%).

For peer review only

Table 5. Companies' commercial interests by ICD-11 codes

| Company              | ICD-11 |    |    |    |    |    |    |    |    |    |    |    |    |    |    |    |    |    |    |    |       |
|----------------------|--------|----|----|----|----|----|----|----|----|----|----|----|----|----|----|----|----|----|----|----|-------|
|                      | 01     | 02 | 03 | 04 | 05 | 06 | 07 | 08 | 09 | 11 | 12 | 13 | 14 | 15 | 16 | 18 | 19 | 20 | 21 | 22 | Other |
| Abbvie               | 1      | 1  | 1  | 0  | 0  | 1  | 0  | 1  | 0  | 0  | 0  | 1  | 1  | 1  | 0  | 0  | 1  | 1  | 0  | 0  | 0     |
| Alexion              | 0      | 0  | 1  | 0  | 1  | 0  | 0  | 1  | 0  | 0  | 0  | 0  | 0  | 0  | 0  | 0  | 0  | 0  | 0  | 0  | 1     |
| Almirall             | 0      | 0  | 0  | 0  | 0  | 0  | 0  | 0  | 0  | 0  | 0  | 0  | 1  | 0  | 0  | 0  | 0  | 0  | 0  | 0  | 0     |
| Alnylam              | 0      | 0  | 0  | 0  | 1  | 0  | 0  | 0  | 0  | 1  | 0  | 0  | 0  | 0  | 0  | 0  | 0  | 0  | 0  | 0  | 1     |
| Amgen                | 0      | 1  | 1  | 0  | 1  | 0  | 0  | 0  | 0  | 1  | 0  | 1  | 1  | 1  | 1  | 0  | 0  | 0  | 0  | 0  | 1     |
| Amryt                | 0      | 0  | 0  | 0  | 1  | 0  | 0  | 0  | 0  | 1  | 0  | 0  | 1  | 0  | 0  | 0  | 0  | 0  | 0  | 0  | 1     |
| Astellas             | 0      | 1  | 1  | 0  | 0  | 0  | 0  | 0  | 0  | 0  | 0  | 0  | 0  | 0  | 1  | 0  | 0  | 0  | 0  | 0  | 1     |
| AstraZeneca          | 0      | 1  | 1  | 0  | 1  | 0  | 0  | 0  | 0  | 1  | 1  | 0  | 0  | 0  | 1  | 0  | 0  | 0  | 0  | 0  | 0     |
| BMS                  | 0      | 1  | 1  | 0  | 0  | 1  | 0  | 1  | 0  | 1  | 1  | 1  | 0  | 1  | 1  | 0  | 0  | 0  | 0  | 0  | 0     |
| Bayer                | 0      | 1  | 1  | 0  | 0  | 0  | 0  | 0  | 1  | 1  | 0  | 1  | 0  | 0  | 1  | 0  | 0  | 0  | 0  | 0  | 0     |
| BioMarin             | 0      | 0  | 1  | 1  | 1  | 1  | 0  | 0  | 0  | 0  | 0  | 0  | 0  | 0  | 0  | 0  | 0  | 0  | 0  | 0  | 1     |
| Biogen               | 0      | 0  | 0  | 0  | 0  | 0  | 0  | 1  | 1  | 0  | 0  | 0  | 0  | 1  | 0  | 0  | 0  | 0  | 0  | 0  | 1     |
| BlueBird             | 0      | 0  | 1  | 0  | 1  | 0  | 0  | 1  | 0  | 0  | 0  | 0  | 0  | 0  | 0  | 0  | 0  | 0  | 0  | 0  | 1     |
| Boehringer Ingelheim | 0      | 1  | 0  | 1  | 1  | 0  | 0  | 0  | 0  | 1  | 1  | 0  | 0  | 0  | 0  | 0  | 0  | 0  | 0  | 0  | 0     |
| Britannia            | 0      | 0  | 0  | 0  | 0  | 1  | 0  | 1  | 0  | 0  | 0  | 0  | 0  | 0  | 0  | 0  | 0  | 0  | 0  | 0  | 1     |
| CSL Behring          | 1      | 0  | 1  | 1  | 0  | 0  | 0  | 0  | 0  | 0  | 0  | 0  | 0  | 0  | 0  | 0  | 0  | 0  | 0  | 0  | 0     |
| Camurus              | 0      | 0  | 0  | 0  | 0  | 1  | 0  | 0  | 0  | 0  | 0  | 0  | 0  | 0  | 0  | 0  | 0  | 0  | 0  | 0  | 1     |
| Celgene              | 0      | 1  | 1  | 0  | 0  | 0  | 0  | 1  | 0  | 0  | 0  | 1  | 1  | 1  | 0  | 0  | 0  | 0  | 0  | 0  | 0     |
| Chiesi               | 0      | 0  | 1  | 0  | 1  | 0  | 0  | 0  | 1  | 1  | 1  | 0  | 0  | 0  | 1  | 0  | 1  | 0  | 0  | 0  | 1     |
| Chugai               | 0      | 0  | 1  | 0  | 0  | 0  | 0  | 1  | 0  | 0  | 0  | 0  | 0  | 1  | 0  | 0  | 0  | 0  | 0  | 0  | 0     |
| Clinuvel             | 0      | 0  | 0  | 0  | 1  | 0  | 0  | 0  | 0  | 0  | 0  | 0  | 0  | 0  | 0  | 0  | 0  | 0  | 0  | 0  | 0     |
| Daiichi Sankyo       | 0      | 0  | 1  | 0  | 0  | 0  | 0  | 0  | 0  | 1  | 0  | 0  | 0  | 0  | 0  | 0  | 0  | 0  | 0  | 0  | 0     |
| Diurnal              | 0      | 0  | 0  | 0  | 1  | 0  | 0  | 0  | 0  | 0  | 0  | 0  | 0  | 0  | 0  | 0  | 0  | 0  | 0  | 0  | 0     |
| Eisai                | 0      | 1  | 0  | 0  | 0  | 1  | 0  | 1  | 0  | 0  | 0  | 1  | 0  | 0  | 0  | 0  | 0  | 0  | 0  | 0  | 1     |
| Eli Lilly            | 0      | 1  | 0  | 0  | 1  | 0  | 0  | 1  | 1  | 0  | 0  | 1  | 1  | 1  | 0  | 0  | 0  | 0  | 0  | 0  | 0     |

|    |                     |   |   |   |   |   |   |   |   |   |   |   |   |   |   |   |   |   |   |   |   |   |
|----|---------------------|---|---|---|---|---|---|---|---|---|---|---|---|---|---|---|---|---|---|---|---|---|
| 1  |                     |   |   |   |   |   |   |   |   |   |   |   |   |   |   |   |   |   |   |   |   |   |
| 2  |                     |   |   |   |   |   |   |   |   |   |   |   |   |   |   |   |   |   |   |   |   |   |
| 3  |                     |   |   |   |   |   |   |   |   |   |   |   |   |   |   |   |   |   |   |   |   |   |
| 4  | <b>Ever</b>         | 0 | 0 | 0 | 0 | 0 | 1 | 0 | 1 | 0 | 0 | 0 | 0 | 0 | 0 | 0 | 0 | 0 | 0 | 0 | 0 | 1 |
| 5  | <b>GSK</b>          | 1 | 1 | 1 | 1 | 0 | 1 | 0 | 1 | 0 | 1 | 1 | 0 | 0 | 0 | 0 | 0 | 0 | 0 | 0 | 0 | 0 |
| 6  | <b>GW</b>           | 0 | 1 | 0 | 0 | 0 | 0 | 0 | 1 | 0 | 0 | 0 | 0 | 0 | 0 | 0 | 0 | 0 | 1 | 0 | 0 | 0 |
| 7  | <b>Grünenthal</b>   | 0 | 0 | 0 | 0 | 0 | 0 | 0 | 0 | 0 | 0 | 0 | 0 | 0 | 1 | 0 | 0 | 0 | 0 | 0 | 0 | 1 |
| 8  | <b>Immedica</b>     | 0 | 1 | 0 | 0 | 1 | 0 | 0 | 0 | 0 | 0 | 0 | 0 | 0 | 0 | 0 | 0 | 0 | 0 | 0 | 0 | 0 |
| 9  | <b>Indivior</b>     | 0 | 0 | 0 | 0 | 0 | 0 | 0 | 0 | 0 | 0 | 0 | 0 | 0 | 0 | 0 | 0 | 0 | 0 | 0 | 0 | 1 |
| 10 | <b>Intercept</b>    | 0 | 0 | 0 | 0 | 0 | 0 | 0 | 0 | 0 | 0 | 1 | 0 | 0 | 0 | 0 | 0 | 0 | 0 | 0 | 0 | 0 |
| 11 | <b>Janssen</b>      | 1 | 1 | 1 | 1 | 1 | 1 | 0 | 0 | 0 | 1 | 1 | 1 | 1 | 1 | 1 | 0 | 0 | 0 | 0 | 0 | 1 |
| 12 | <b>LEO</b>          | 0 | 0 | 1 | 0 | 0 | 0 | 0 | 0 | 1 | 0 | 0 | 1 | 0 | 0 | 0 | 0 | 1 | 0 | 0 | 0 | 0 |
| 13 | <b>Lundbeck</b>     | 0 | 0 | 0 | 0 | 0 | 1 | 0 | 1 | 0 | 0 | 0 | 0 | 0 | 0 | 0 | 0 | 0 | 0 | 0 | 0 | 0 |
| 14 | <b>Lupin</b>        | 0 | 0 | 0 | 0 | 0 | 0 | 0 | 1 | 0 | 0 | 0 | 0 | 0 | 0 | 0 | 0 | 0 | 0 | 0 | 0 | 1 |
| 15 | <b>MSD</b>          | 1 | 1 | 0 | 0 | 0 | 0 | 0 | 1 | 1 | 1 | 0 | 0 | 0 | 0 | 0 | 0 | 0 | 0 | 0 | 0 | 1 |
| 16 | <b>Merck</b>        | 0 | 1 | 0 | 0 | 1 | 0 | 0 | 1 | 0 | 0 | 0 | 0 | 0 | 0 | 1 | 1 | 0 | 1 | 0 | 0 | 1 |
| 17 | <b>Merz</b>         | 0 | 0 | 0 | 0 | 0 | 0 | 0 | 1 | 0 | 1 | 0 | 0 | 0 | 0 | 0 | 0 | 0 | 0 | 0 | 0 | 1 |
| 18 | <b>Napp</b>         | 0 | 1 | 0 | 0 | 0 | 0 | 0 | 0 | 0 | 0 | 1 | 0 | 0 | 0 | 0 | 0 | 0 | 0 | 0 | 0 | 1 |
| 19 | <b>Novartis</b>     | 0 | 1 | 1 | 1 | 1 | 0 | 0 | 1 | 1 | 1 | 1 | 0 | 1 | 1 | 1 | 0 | 0 | 1 | 0 | 0 | 1 |
| 20 | <b>Novo Nordisk</b> | 0 | 0 | 1 | 0 | 1 | 0 | 0 | 0 | 0 | 1 | 0 | 0 | 0 | 0 | 0 | 0 | 0 | 1 | 0 | 0 | 0 |
| 21 | <b>PTC</b>          | 0 | 0 | 0 | 0 | 0 | 0 | 0 | 1 | 0 | 0 | 0 | 0 | 0 | 0 | 0 | 0 | 0 | 0 | 0 | 0 | 1 |
| 22 | <b>Pfizer</b>       | 1 | 1 | 1 | 1 | 1 | 0 | 0 | 1 | 1 | 1 | 1 | 1 | 1 | 1 | 1 | 0 | 0 | 0 | 1 | 0 | 1 |
| 23 | <b>Pierre Fabre</b> | 0 | 1 | 0 | 0 | 0 | 0 | 0 | 0 | 0 | 0 | 0 | 0 | 1 | 0 | 0 | 0 | 0 | 0 | 0 | 0 | 0 |
| 24 | <b>Recordati</b>    | 0 | 1 | 0 | 0 | 1 | 0 | 0 | 0 | 0 | 0 | 0 | 0 | 0 | 0 | 0 | 0 | 0 | 0 | 0 | 0 | 0 |
| 25 | <b>Roche</b>        | 0 | 1 | 1 | 1 | 0 | 1 | 0 | 1 | 1 | 1 | 1 | 0 | 1 | 0 | 1 | 0 | 1 | 0 | 0 | 0 | 1 |
| 26 | <b>Rosemont</b>     | 0 | 0 | 0 | 0 | 0 | 0 | 0 | 0 | 0 | 0 | 0 | 0 | 0 | 0 | 0 | 0 | 0 | 0 | 0 | 0 | 0 |
| 27 | <b>Sanofi</b>       | 1 | 1 | 1 | 1 | 1 | 1 | 0 | 1 | 0 | 1 | 1 | 0 | 1 | 1 | 1 | 0 | 0 | 1 | 0 | 0 | 1 |
| 28 | <b>Santen</b>       | 0 | 0 | 0 | 1 | 0 | 0 | 0 | 0 | 1 | 0 | 0 | 0 | 0 | 0 | 0 | 0 | 0 | 0 | 0 | 0 | 0 |
| 29 | <b>Seqirus</b>      | 0 | 0 | 0 | 0 | 0 | 0 | 0 | 0 | 0 | 0 | 0 | 0 | 0 | 0 | 0 | 0 | 0 | 0 | 0 | 0 | 1 |
| 30 | <b>Servier</b>      | 0 | 1 | 1 | 0 | 0 | 0 | 0 | 0 | 0 | 1 | 0 | 0 | 0 | 0 | 0 | 0 | 0 | 0 | 0 | 0 | 0 |
| 31 | <b>Shire</b>        | 0 | 0 | 1 | 1 | 1 | 1 | 0 | 0 | 0 | 0 | 0 | 0 | 0 | 0 | 0 | 0 | 0 | 0 | 0 | 0 | 1 |
| 32 | <b>Sobi</b>         | 0 | 1 | 1 | 0 | 1 | 0 | 0 | 0 | 0 | 0 | 0 | 0 | 0 | 0 | 0 | 0 | 0 | 0 | 0 | 0 | 1 |
| 33 | <b>Takeda</b>       | 0 | 1 | 1 | 0 | 1 | 1 | 0 | 0 | 0 | 0 | 0 | 1 | 1 | 0 | 0 | 0 | 0 | 0 | 0 | 0 | 0 |
| 34 |                     |   |   |   |   |   |   |   |   |   |   |   |   |   |   |   |   |   |   |   |   |   |
| 35 |                     |   |   |   |   |   |   |   |   |   |   |   |   |   |   |   |   |   |   |   |   |   |
| 36 |                     |   |   |   |   |   |   |   |   |   |   |   |   |   |   |   |   |   |   |   |   |   |
| 37 |                     |   |   |   |   |   |   |   |   |   |   |   |   |   |   |   |   |   |   |   |   |   |
| 38 |                     |   |   |   |   |   |   |   |   |   |   |   |   |   |   |   |   |   |   |   |   |   |
| 39 |                     |   |   |   |   |   |   |   |   |   |   |   |   |   |   |   |   |   |   |   |   |   |
| 40 |                     |   |   |   |   |   |   |   |   |   |   |   |   |   |   |   |   |   |   |   |   |   |
| 41 |                     |   |   |   |   |   |   |   |   |   |   |   |   |   |   |   |   |   |   |   |   |   |
| 42 |                     |   |   |   |   |   |   |   |   |   |   |   |   |   |   |   |   |   |   |   |   |   |
| 43 |                     |   |   |   |   |   |   |   |   |   |   |   |   |   |   |   |   |   |   |   |   |   |
| 44 |                     |   |   |   |   |   |   |   |   |   |   |   |   |   |   |   |   |   |   |   |   |   |
| 45 |                     |   |   |   |   |   |   |   |   |   |   |   |   |   |   |   |   |   |   |   |   |   |
| 46 |                     |   |   |   |   |   |   |   |   |   |   |   |   |   |   |   |   |   |   |   |   |   |

1  
2  
3  
4  
5  
6  
7  
8  
9  
10  
11  
12  
13  
14  
15  
16  
17  
18  
19  
20  
21  
22  
23  
24  
25  
26  
27  
28  
29  
30  
31  
32  
33  
34  
35  
36  
37  
38  
39  
40  
41  
42  
43  
44  
45  
46

|                 |   |   |   |   |   |   |   |   |   |   |   |   |   |   |   |   |   |   |   |   |   |
|-----------------|---|---|---|---|---|---|---|---|---|---|---|---|---|---|---|---|---|---|---|---|---|
| <b>Tillotts</b> | 0 | 0 | 0 | 0 | 0 | 0 | 0 | 0 | 0 | 0 | 0 | 0 | 1 | 0 | 0 | 0 | 0 | 0 | 0 | 0 | 0 |
| <b>UCB</b>      | 0 | 0 | 1 | 0 | 0 | 0 | 0 | 1 | 0 | 0 | 0 | 0 | 1 | 1 | 1 | 0 | 0 | 0 | 0 | 0 | 1 |
| <b>Valneva</b>  | 1 | 0 | 0 | 0 | 0 | 0 | 0 | 0 | 0 | 0 | 0 | 0 | 0 | 0 | 0 | 0 | 0 | 0 | 0 | 0 | 0 |
| <b>Vifor</b>    | 0 | 0 | 0 | 1 | 0 | 0 | 0 | 0 | 0 | 1 | 0 | 0 | 1 | 0 | 1 | 0 | 0 | 0 | 0 | 0 | 0 |
| <b>Zogenix</b>  | 0 | 0 | 0 | 0 | 0 | 0 | 0 | 1 | 0 | 0 | 0 | 0 | 0 | 0 | 0 | 0 | 0 | 0 | 0 | 0 | 0 |

Notes: This table reflects whether companies had a definite or probable interest in the ICD-11 code based on their pipeline or portfolio (1 = yes, 0 = no). Please note that companies' interests were opportunistically screened only in disease areas where they made a payment to a specific patient organisation, and therefore this table should not be considered exhaustive. The table refers to all years included in the analysis (2018-2020).

Legend: 01 Certain infectious or parasitic diseases; 02 Neoplasms; 03 Diseases of the blood or blood-forming organs; 04 Diseases of the immune system; 05 Endocrine, nutritional or metabolic diseases; 06 Mental, behavioural or neurodevelopmental disorders; 07 Sleep-wake disorders; 08 Diseases of the nervous system; 09 Diseases of the visual system; 11 Diseases of the circulatory system; 12 Diseases of the respiratory system; 13 Diseases of the digestive system; 14 Diseases of the skin; 15 Diseases of the musculoskeletal system or connective tissue; 16 Diseases of the genitourinary system; 18 Pregnancy, childbirth or the puerperium; 19 Certain conditions originating in the perinatal period; 20 Developmental anomalies; 21 Symptoms, signs or clinical findings, not elsewhere classified; 22 Injury, poisoning or certain other consequences of external causes; Other. Other indicates disease areas where patient organisations operate that could not be classified as any ICD-11 codes.

**Table 6. List of patient organisations receiving payments between 2018-2020**

| Standardised name                                      | Charity number | Link                                                                                                                                                                                                              |
|--------------------------------------------------------|----------------|-------------------------------------------------------------------------------------------------------------------------------------------------------------------------------------------------------------------|
| Acacia Mews Care Home                                  | 1174346        | <a href="https://www.nhs.uk/services/Careproviders/Overview/DefaultView.aspx?id=47011">https://www.nhs.uk/services/Careproviders/Overview/DefaultView.aspx?id=47011</a>                                           |
| Action Bladder Cancer UK                               | 1164374        | <a href="https://actionbladdercanceruk.org/">https://actionbladdercanceruk.org/</a>                                                                                                                               |
| Action for Myalgic Encephalomyelitis                   | 1036419        | <a href="https://www.actionforme.org.uk/">https://www.actionforme.org.uk/</a>                                                                                                                                     |
| Action for Pulmonary Fibrosis                          | 1152399        | <a href="https://www.actionpf.org/">https://www.actionpf.org/</a>                                                                                                                                                 |
| Action On Pre-Eclampsia                                | 1013557        | <a href="https://action-on-pre-eclampsia.org.uk/">https://action-on-pre-eclampsia.org.uk/</a>                                                                                                                     |
| Action on Smoking and Health - Wales                   | 1120834        | <a href="https://ash.wales/">https://ash.wales/</a>                                                                                                                                                               |
| Action Duchenne                                        | 1101971        | <a href="https://www.actionduchenne.org/">https://www.actionduchenne.org/</a>                                                                                                                                     |
| Adfam                                                  | 1067428        | <a href="https://adfam.org.uk/">https://adfam.org.uk/</a>                                                                                                                                                         |
| ADHD Foundation                                        | 1120898        | <a href="https://adhdfoundation.org.uk/">https://adhdfoundation.org.uk/</a>                                                                                                                                       |
| ADHD Norfolk                                           | 1177126        | <a href="https://www.adhdnorfolk.org.uk/">https://www.adhdnorfolk.org.uk/</a>                                                                                                                                     |
| Africa Advocacy Foundation                             | 1164778        | <a href="https://www.africadvocacy.org/">https://www.africadvocacy.org/</a>                                                                                                                                       |
| African-Caribbean Leukaemia Trust                      | 1119516        | <a href="https://aact.org/">https://aact.org/</a>                                                                                                                                                                 |
| Age UK                                                 | 1128267        | <a href="https://www.ageuk.org.uk/">https://www.ageuk.org.uk/</a>                                                                                                                                                 |
| Alex - The Leukodystrophy Charity                      | 1106008        | <a href="https://www.alextlc.org/">https://www.alextlc.org/</a>                                                                                                                                                   |
| Alex's Wish                                            | 1148845        | <a href="https://alexswish.co.uk/">https://alexswish.co.uk/</a>                                                                                                                                                   |
| ALK Positive Lung Cancer                               | 1181171        | <a href="https://www.alkpositive.org.uk/">https://www.alkpositive.org.uk/</a>                                                                                                                                     |
| Alkaptonuria Society                                   | 1101052        | <a href="https://akusociety.org/">https://akusociety.org/</a>                                                                                                                                                     |
| Allergy UK                                             | 1094231        | <a href="https://www.allergyuk.org/">https://www.allergyuk.org/</a>                                                                                                                                               |
| Alport UK                                              | 1154774        | <a href="http://www.alportuk.org/">http://www.alportuk.org/</a>                                                                                                                                                   |
| Alzheimer's Society                                    | 296645         | <a href="https://www.alzheimers.org.uk/">https://www.alzheimers.org.uk/</a>                                                                                                                                       |
| Alzheimer's Support                                    | 1048314        | <a href="https://www.alzheimerswiltshire.org.uk/">https://www.alzheimerswiltshire.org.uk/</a>                                                                                                                     |
| Alzheimer's Research UK                                | 1077089        | <a href="https://www.alzheimersresearchuk.org/">https://www.alzheimersresearchuk.org/</a>                                                                                                                         |
| Alzheimer's Society                                    | 296645         | <a href="https://www.alzheimers.org.uk/">https://www.alzheimers.org.uk/</a>                                                                                                                                       |
| Anaemia Nurse Specialist Association                   | 1183384        | <a href="https://anaemianurse.org/home/about/">https://anaemianurse.org/home/about/</a>                                                                                                                           |
| Anglo Dutch Migraine Association                       | 1044398        | <a href="https://www.anglodutchmigraine.org/">https://www.anglodutchmigraine.org/</a>                                                                                                                             |
| Anthony Nolan                                          | 803716         | <a href="https://www.anthonynolan.org/">https://www.anthonynolan.org/</a>                                                                                                                                         |
| Anticoagulation UK                                     | 1090250        | <a href="https://register-of-charities.charitycommission.gov.uk/charity-details/?regid=1090250&amp;subid=0">https://register-of-charities.charitycommission.gov.uk/charity-details/?regid=1090250&amp;subid=0</a> |
| AOFAC Foundation                                       | 1162155        | <a href="https://aofacfoundation.org/">https://aofacfoundation.org/</a>                                                                                                                                           |
| Aplastic Anaemia Trust                                 | 1107539        | <a href="https://www.theaat.org.uk/">https://www.theaat.org.uk/</a>                                                                                                                                               |
| APS Support UK                                         | 1138116        | <a href="https://aps-support.org.uk/">https://aps-support.org.uk/</a>                                                                                                                                             |
| Arrhythmia Alliance                                    | 1107496        | <a href="https://www.heartrhythmalliance.org/aa/uk">https://www.heartrhythmalliance.org/aa/uk</a>                                                                                                                 |
| Arthritis and Musculoskeletal Alliance                 | 1108851        | <a href="http://arma.uk.net/">http://arma.uk.net/</a>                                                                                                                                                             |
| Aspens                                                 | 1171446        | <a href="https://www.aspens.org.uk/">https://www.aspens.org.uk/</a>                                                                                                                                               |
| Association for Glycogen Storage Disease               | 1132271        | <a href="https://agsd.org.uk/">https://agsd.org.uk/</a>                                                                                                                                                           |
| Association for Multiple Endocrine Neoplasia Disorders | 1153890        | <a href="https://www.amend.org.uk/">https://www.amend.org.uk/</a>                                                                                                                                                 |



|                                                |         |                                                                                                                                                                                                               |
|------------------------------------------------|---------|---------------------------------------------------------------------------------------------------------------------------------------------------------------------------------------------------------------|
| Asthma + Lung UK                               | 326730  | <a href="https://www.asthma.org.uk/">https://www.asthma.org.uk/</a>                                                                                                                                           |
| Astriid                                        | 1176645 | <a href="https://astriid.org/">https://astriid.org/</a>                                                                                                                                                       |
| Atrial Fibrillation Association                | 1122442 | <a href="https://www.heartrhythmalliance.org/afa/uk/">https://www.heartrhythmalliance.org/afa/uk/</a>                                                                                                         |
| Autistica                                      | 1107350 | <a href="https://www.autistica.org.uk/">https://www.autistica.org.uk/</a>                                                                                                                                     |
| Axial Spondylitis International Federation     | 1173902 | <a href="https://asif.info/">https://asif.info/</a>                                                                                                                                                           |
| Baby Lifeline                                  | 1006457 | <a href="https://www.babylifeline.org.uk/">https://www.babylifeline.org.uk/</a>                                                                                                                               |
| Barrett's Oesophagus UK                        | 1127495 | <a href="https://register-of-charities.charitycommission.gov.uk/charity-search/-/charity-details/4043374">https://register-of-charities.charitycommission.gov.uk/charity-search/-/charity-details/4043374</a> |
| Bath Institute for Rheumatic Diseases          | 1040650 | <a href="https://www.birdbath.org.uk/">https://www.birdbath.org.uk/</a>                                                                                                                                       |
| Batten Disease Family Association              | 1084908 | <a href="http://www.bdfa-uk.org.uk/">http://www.bdfa-uk.org.uk/</a>                                                                                                                                           |
| Bike the UK for MS                             | 1172717 | <a href="https://bikettheukforms.org/">https://bikettheukforms.org/</a>                                                                                                                                       |
| Bipolar UK                                     | 293340  | <a href="https://www.bipolaruk.org/">https://www.bipolaruk.org/</a>                                                                                                                                           |
| Bladder Health UK                              | 1149973 | <a href="https://bladderhealthuk.org/">https://bladderhealthuk.org/</a>                                                                                                                                       |
| Bliss                                          | 1002973 | <a href="https://www.bliss.org.uk/">https://www.bliss.org.uk/</a>                                                                                                                                             |
| Blood Cancer UK                                | 216032  | <a href="https://bloodcancer.org.uk/">https://bloodcancer.org.uk/</a>                                                                                                                                         |
| BME Cancer Communities                         | 1182806 | <a href="https://www.bmecancer.com/">https://www.bmecancer.com/</a>                                                                                                                                           |
| Bone Cancer Research Trust                     | 1159590 | <a href="https://www.bcrct.org.uk/">https://www.bcrct.org.uk/</a>                                                                                                                                             |
| Bowel Cancer UK                                | 1071038 | <a href="https://www.bowelcanceruk.org.uk/">https://www.bowelcanceruk.org.uk/</a>                                                                                                                             |
| Brain Tumour Charity                           | 1150054 | <a href="https://www.thebraintumourcharity.org/">https://www.thebraintumourcharity.org/</a>                                                                                                                   |
| Brain Tumour Research                          | 1153487 | <a href="https://www.braintumourresearch.org/">https://www.braintumourresearch.org/</a>                                                                                                                       |
| Brain Tumour Support                           | 1163856 | <a href="https://www.braintumoursupport.co.uk/">https://www.braintumoursupport.co.uk/</a>                                                                                                                     |
| Brains Trust                                   | 1114634 | <a href="https://brainstrust.org.uk/">https://brainstrust.org.uk/</a>                                                                                                                                         |
| Breast Cancer Haven (The Haven)                | 1061726 | <a href="https://www.breastcancerhaven.org.uk/">https://www.breastcancerhaven.org.uk/</a>                                                                                                                     |
| Breast Cancer Now                              | 1160558 | <a href="https://breastcancer.org.uk/">https://breastcancer.org.uk/</a>                                                                                                                                       |
| Bristol & Weston Hospitals Charity             | 1170973 | <a href="https://www.bwhospitalscharity.org.uk/">https://www.bwhospitalscharity.org.uk/</a>                                                                                                                   |
| British Association for Sexual Health & HIV    | 1148196 | <a href="https://www.bashh.org/">https://www.bashh.org/</a>                                                                                                                                                   |
| British Association for the Study of the Liver | 1106320 | <a href="https://www.basl.org.uk/">https://www.basl.org.uk/</a>                                                                                                                                               |
| British Geriatric Society                      | 268762  | <a href="https://www.bgs.org.uk/">https://www.bgs.org.uk/</a>                                                                                                                                                 |
| British Heart Foundation                       | 225971  | <a href="https://www.bhf.org.uk/">https://www.bhf.org.uk/</a>                                                                                                                                                 |
| British Infertility Counselling Association    | 803743  | <a href="https://www.bica.net/">https://www.bica.net/</a>                                                                                                                                                     |
| British Inherited Metabolic Disease Group      | 1184024 | <a href="https://www.bimdg.org.uk/site/index.asp">https://www.bimdg.org.uk/site/index.asp</a>                                                                                                                 |
| British Liver Trust                            | 298858  | <a href="https://britishlivertrust.org.uk/">https://britishlivertrust.org.uk/</a>                                                                                                                             |
| British Paediatric Neurology Association       | 1159115 | <a href="https://bpna.org.uk/">https://bpna.org.uk/</a>                                                                                                                                                       |
| British Porphyria Association                  | 1089609 | <a href="http://porphyria.org.uk/">http://porphyria.org.uk/</a>                                                                                                                                               |
| British Sarcoma Group                          | 1154928 | <a href="https://britishsarcomagroup.org.uk/">https://britishsarcomagroup.org.uk/</a>                                                                                                                         |
| British Skin Foundation                        | 1171373 | <a href="https://www.britishskinfoundation.org.uk/">https://www.britishskinfoundation.org.uk/</a>                                                                                                             |
| British Society for Heart Failure              | 1075720 | <a href="https://www.bsh.org.uk/">https://www.bsh.org.uk/</a>                                                                                                                                                 |

|    |                                                   |         |                                                                                                                                                                                       |
|----|---------------------------------------------------|---------|---------------------------------------------------------------------------------------------------------------------------------------------------------------------------------------|
| 1  | British Society of Echocardiography               | 1093808 | <a href="https://www.bsecho.org/">https://www.bsecho.org/</a>                                                                                                                         |
| 2  | British Thyroid Foundation                        | 1006391 | <a href="https://www.btf-thyroid.org/">https://www.btf-thyroid.org/</a>                                                                                                               |
| 3  | British Voice Association                         | 1078709 | <a href="http://www.britishvoiceassociation.org.uk/">http://www.britishvoiceassociation.org.uk/</a>                                                                                   |
| 4  | Brittle Bone Society                              | 272100  | <a href="https://www.brittlebone.org/">https://www.brittlebone.org/</a>                                                                                                               |
| 5  | Cambridge Rare Disease Network                    | 1166365 | <a href="https://www.camraredisease.org/">https://www.camraredisease.org/</a>                                                                                                         |
| 6  | Cancer 52                                         | 1174569 | <a href="https://www.cancer52.org.uk/">https://www.cancer52.org.uk/</a>                                                                                                               |
| 7  | Cancer Black Care                                 | 1086465 | <a href="https://www.cancerblackcare.org.uk/">https://www.cancerblackcare.org.uk/</a>                                                                                                 |
| 8  | Cancer Research UK                                | 1089464 | <a href="https://www.cancerresearchuk.org/">https://www.cancerresearchuk.org/</a>                                                                                                     |
| 9  | Cancer Support UK                                 | 1105703 | <a href="https://cancersupportuk.org/">https://cancersupportuk.org/</a>                                                                                                               |
| 10 | CancerCare                                        | 1120048 | <a href="https://cancercare.org.uk/">https://cancercare.org.uk/</a>                                                                                                                   |
| 11 | Cara Trust                                        | 328124  | <a href="https://www.madtrust.org.uk/project/the-cara-trust/">https://www.madtrust.org.uk/project/the-cara-trust/</a>                                                                 |
| 12 | Cardiac Risk in the Young                         | 1050845 | <a href="https://www.c-r-y.org.uk/">https://www.c-r-y.org.uk/</a>                                                                                                                     |
| 13 | Cardiomyopathy UK                                 | 1164263 | <a href="https://www.cardiomyopathy.org/">https://www.cardiomyopathy.org/</a>                                                                                                         |
| 14 | Carers Trust                                      | 1145181 | <a href="https://carers.org/">https://carers.org/</a>                                                                                                                                 |
| 15 | Carers Worldwide                                  | 1150214 | <a href="https://carersworldwide.org/">https://carersworldwide.org/</a>                                                                                                               |
| 16 | Changing Faces                                    | 1011222 | <a href="https://www.changingfaces.org.uk/">https://www.changingfaces.org.uk/</a>                                                                                                     |
| 17 | Child Growth Foundation                           | 1172807 | <a href="https://childgrowthfoundation.org/">https://childgrowthfoundation.org/</a>                                                                                                   |
| 18 | Childhood Trust                                   | 1154032 | <a href="https://www.childhoodtrust.org.uk/">https://www.childhoodtrust.org.uk/</a>                                                                                                   |
| 19 | Children's Cancer and Leukaemia Group             | 1182637 | <a href="https://www.cclg.org.uk/">https://www.cclg.org.uk/</a>                                                                                                                       |
| 20 | Children's HIV Association                        | 1122356 | <a href="https://www.chiva.org.uk/">https://www.chiva.org.uk/</a>                                                                                                                     |
| 21 | Children's Trust                                  | 288018  | <a href="https://www.thechildrenstrust.org.uk/">https://www.thechildrenstrust.org.uk/</a>                                                                                             |
| 22 | Children's Burns Trust                            | 1082084 | <a href="https://www.cbtrust.org.uk/">https://www.cbtrust.org.uk/</a>                                                                                                                 |
| 23 | Cholangiocarcinoma Charity                        | 1091915 | <a href="https://ammf.org.uk/">https://ammf.org.uk/</a>                                                                                                                               |
| 24 | Chronic Lymphocytic Leukaemia Support Association | 1178482 | <a href="https://www.clisupport.org.uk/">https://www.clisupport.org.uk/</a>                                                                                                           |
| 25 | Chronic Myeloid Leukaemia Support Group           | 1114037 | <a href="https://cmlsupport.org.uk/">https://cmlsupport.org.uk/</a>                                                                                                                   |
| 26 | Coalition for Life-Course Immunisation            | 1182662 | <a href="https://www.cl-ci.org/">https://www.cl-ci.org/</a>                                                                                                                           |
| 27 | Confederation of Meningitis Organisations         | 1091105 | <a href="https://www.comeningitis.org/">https://www.comeningitis.org/</a>                                                                                                             |
| 28 | Congenital Adrenal Hyperplasia Support Group      | 1178951 | <a href="https://geneticalliance.org.uk/member/congenital-adrenal-hyperplasia-support-group/">https://geneticalliance.org.uk/member/congenital-adrenal-hyperplasia-support-group/</a> |
| 29 | Contact a Family                                  | 284912  | <a href="https://contact.org.uk/">https://contact.org.uk/</a>                                                                                                                         |
| 30 | Crohn's and Colitis UK                            | 1117148 | <a href="https://www.crohnsandcolitis.org.uk/">https://www.crohnsandcolitis.org.uk/</a>                                                                                               |
| 31 | Crohn's In Childhood Research Association         | 278212  | <a href="https://www.cicra.org/">https://www.cicra.org/</a>                                                                                                                           |
| 32 | Cure Leukaemia                                    | 1100154 | <a href="https://www.cureleukaemia.co.uk/">https://www.cureleukaemia.co.uk/</a>                                                                                                       |
| 33 | Cystic Fibrosis Trust                             | 1079049 | <a href="https://www.cysticfibrosis.org.uk/">https://www.cysticfibrosis.org.uk/</a>                                                                                                   |
| 34 | Delete Blood Cancer                               | 1150056 | <a href="https://www.dkms.org.uk/">https://www.dkms.org.uk/</a>                                                                                                                       |
| 35 | Dementia UK                                       | 1039404 | <a href="https://www.dementiauk.org/">https://www.dementiauk.org/</a>                                                                                                                 |
| 36 | Dementia Club UK                                  | 1168397 | <a href="https://dementiaclubuk.org.uk/">https://dementiaclubuk.org.uk/</a>                                                                                                           |
| 37 | Diabetes UK                                       | 215199  | <a href="https://www.diabetes.org.uk/">https://www.diabetes.org.uk/</a>                                                                                                               |

|    |                                               |         |                                                                                                                             |
|----|-----------------------------------------------|---------|-----------------------------------------------------------------------------------------------------------------------------|
| 1  | Diabetes UK - Northern Ireland                | 215199  | <a href="https://www.diabetes.org.uk/in_your_area/n_ireland">https://www.diabetes.org.uk/in_your_area/n_ireland</a>         |
| 2  | Diana Award                                   | 1117288 | <a href="https://diana-award.org.uk/">https://diana-award.org.uk/</a>                                                       |
| 3  | Different Strokes                             | 1092168 | <a href="https://differentstrokes.co.uk/">https://differentstrokes.co.uk/</a>                                               |
| 4  | Disasters Emergency Committee                 | 1062638 | <a href="https://www.dec.org.uk/">https://www.dec.org.uk/</a>                                                               |
| 5  | DMD Pathfinders                               | 1155884 | <a href="https://www.pathfindersalliance.org.uk/">https://www.pathfindersalliance.org.uk/</a>                               |
| 6  | Donor Conception Network                      | 1041297 | <a href="https://www.dcnetwork.org/">https://www.dcnetwork.org/</a>                                                         |
| 7  | Down Syndrome International                   | 1091843 | <a href="https://www.ds-int.org/">https://www.ds-int.org/</a>                                                               |
| 8  | Downs Syndrome Association                    | 1061474 | <a href="https://www.downs-syndrome.org.uk/">https://www.downs-syndrome.org.uk/</a>                                         |
| 9  | Dravet Syndrome UK                            | 1128289 | <a href="https://www.dravet.org.uk/">https://www.dravet.org.uk/</a>                                                         |
| 10 | DrugFAM                                       | 1123316 | <a href="https://www.drugfam.co.uk/#">https://www.drugfam.co.uk/#</a>                                                       |
| 11 | Duchenne UK                                   | 1147094 | <a href="https://www.duchenneuk.org/">https://www.duchenneuk.org/</a>                                                       |
| 12 | Dystonia UK                                   | 1062595 | <a href="https://www.dystonia.org.uk/">https://www.dystonia.org.uk/</a>                                                     |
| 13 | East North Hertfordshire NHS Trust            | 1053338 | <a href="https://www.enherts-tr.nhs.uk/">https://www.enherts-tr.nhs.uk/</a>                                                 |
| 14 | East Sussex Healthcare NHS Trust              | 1058599 | <a href="https://www.esht.nhs.uk/">https://www.esht.nhs.uk/</a>                                                             |
| 15 | Ecancer                                       | 1176307 | <a href="https://ecancer.org/en/">https://ecancer.org/en/</a>                                                               |
| 16 | Encephalitis Society                          | 1087843 | <a href="https://www.encephalitis.info/">https://www.encephalitis.info/</a>                                                 |
| 17 | Endometriosis UK                              | 1035810 | <a href="https://www.endometriosis-uk.org/">https://www.endometriosis-uk.org/</a>                                           |
| 18 | Epilepsy Action                               | 234343  | <a href="https://www.epilepsy.org.uk/">https://www.epilepsy.org.uk/</a>                                                     |
| 19 | Epilepsy Research UK                          | 1100394 | <a href="https://epilepsyresearch.org.uk/">https://epilepsyresearch.org.uk/</a>                                             |
| 20 | Epilepsy Society                              | 206186  | <a href="https://epilepsysociety.org.uk/">https://epilepsysociety.org.uk/</a>                                               |
| 21 | Errol Mckellar Foundation                     | 1181574 | <a href="https://www.theerrolmckellarfoundation.com/">https://www.theerrolmckellarfoundation.com/</a>                       |
| 22 | European Association for the Study of Obesity | 1111288 | <a href="https://easo.org/">https://easo.org/</a>                                                                           |
| 23 | European Parkinson's Disease Association      | 1163211 | <a href="https://www.epda.eu.com/">https://www.epda.eu.com/</a>                                                             |
| 24 | Eve Appeal                                    | 1091708 | <a href="https://eveappeal.org.uk/">https://eveappeal.org.uk/</a>                                                           |
| 25 | Familial Hypercholesterolaemia Network        | 1170731 | <a href="https://fheurope.org/">https://fheurope.org/</a>                                                                   |
| 26 | FareShare                                     | 1100051 | <a href="https://fareshare.org.uk/">https://fareshare.org.uk/</a>                                                           |
| 27 | Fertility Network UK                          | 1099960 | <a href="https://fertilitynetworkuk.org/">https://fertilitynetworkuk.org/</a>                                               |
| 28 | Fight Bladder Cancer                          | 1157763 | <a href="https://www.fightbladdercancer.co.uk/">https://www.fightbladdercancer.co.uk/</a>                                   |
| 29 | Fight for Sight UK                            | 1111438 | <a href="https://www.fightforsight.org.uk/">https://www.fightforsight.org.uk/</a>                                           |
| 30 | Findacure / Beacon for rare diseases LTD      | 1149646 | <a href="https://www.rarebeacon.org/about-us/our-journey/">https://www.rarebeacon.org/about-us/our-journey/</a>             |
| 31 | Fungal Infection Trust                        | 1147658 | <a href="https://fungalinfectiontrust.org/">https://fungalinfectiontrust.org/</a>                                           |
| 32 | Gauchers Association                          | 1095657 | <a href="https://www.gaucher.org.uk/">https://www.gaucher.org.uk/</a>                                                       |
| 33 | Gene People                                   | 1141583 | <a href="https://genepeople.org.uk/">https://genepeople.org.uk/</a>                                                         |
| 34 | Genetic Alliance UK                           | 1114195 | <a href="https://geneticalliance.org.uk/">https://geneticalliance.org.uk/</a>                                               |
| 35 | GIST Cancer UK                                | 1129219 | <a href="https://www.gistcancer.org.uk/">https://www.gistcancer.org.uk/</a>                                                 |
| 36 | GIST Support UK                               | 1129219 | <a href="https://geneticalliance.org.uk/member/gist-support-uk/">https://geneticalliance.org.uk/member/gist-support-uk/</a> |
| 37 | Global Action on Men's Health                 | 1183428 | <a href="https://gamh.org/">https://gamh.org/</a>                                                                           |
| 38 | GO Girls                                      | 1179108 | <a href="https://www.gogirlssupport.org/">https://www.gogirlssupport.org/</a>                                               |

|                                                                   |         |                                                                                                                                                         |
|-------------------------------------------------------------------|---------|---------------------------------------------------------------------------------------------------------------------------------------------------------|
| Gorlin Syndrome Group                                             | 1197282 | <a href="https://gorlingroup.org/">https://gorlingroup.org/</a>                                                                                         |
| Guts UK                                                           | 1137029 | <a href="https://gutscharity.org.uk/">https://gutscharity.org.uk/</a>                                                                                   |
| Haemochromatosis UK                                               | 1001307 | <a href="https://www.haemochromatosis.org.uk/">https://www.haemochromatosis.org.uk/</a>                                                                 |
| Haemophilia Society                                               | 288260  | <a href="https://haemophilia.org.uk/">https://haemophilia.org.uk/</a>                                                                                   |
| Haemophilia Wales                                                 | 1158941 | <a href="https://haemophiliawales.org/">https://haemophiliawales.org/</a>                                                                               |
| Harefield Hamsters Transplant Club                                | 1060656 | <a href="https://harefieldhamsters.org/">https://harefieldhamsters.org/</a>                                                                             |
| Head & Neck Cancer UK                                             | 1175181 | <a href="https://hancuk.org/">https://hancuk.org/</a>                                                                                                   |
| Headway East London                                               | 1083910 | <a href="https://headwayeastlondon.org/">https://headwayeastlondon.org/</a>                                                                             |
| Heart UK                                                          | 1003904 | <a href="https://www.heartuk.org.uk/">https://www.heartuk.org.uk/</a>                                                                                   |
| Heartburn Cancer UK                                               | 1136413 | <a href="https://www.heartburncanceruk.org/">https://www.heartburncanceruk.org/</a>                                                                     |
| Helen & Douglas House                                             | 1085951 | <a href="https://www.helenanddouglas.org.uk/">https://www.helenanddouglas.org.uk/</a>                                                                   |
| Helping Overcome Obesity Problems                                 | 1150683 | <a href="http://hoopuk.org.uk/">http://hoopuk.org.uk/</a>                                                                                               |
| Hepatitis C Trust                                                 | 1104279 | <a href="http://hepctrust.org.uk/">http://hepctrust.org.uk/</a>                                                                                         |
| Hereditary Angioedema UK                                          | 1152591 | <a href="https://www.haeuk.org/">https://www.haeuk.org/</a>                                                                                             |
| Hidradenitis Suppurativa Trust                                    | 1177819 | <a href="https://painuk.org/members/charities/hidradenitis-suppurativa-trust/">https://painuk.org/members/charities/hidradenitis-suppurativa-trust/</a> |
| Histiocytosis UK                                                  | 1158789 | <a href="https://www.histiouk.org/">https://www.histiouk.org/</a>                                                                                       |
| HIV i-Base                                                        | 1081905 | <a href="https://i-base.info/">https://i-base.info/</a>                                                                                                 |
| Home-Start Hampshire                                              | 1144661 | <a href="https://home-starthampshire.org.uk/">https://home-starthampshire.org.uk/</a>                                                                   |
| Hope for Tomorrow                                                 | 1094677 | <a href="https://hopefortomorrow.org.uk/">https://hopefortomorrow.org.uk/</a>                                                                           |
| Human Story Theatre                                               | 1173504 | <a href="https://humanstorytheatre.com/about-us/">https://humanstorytheatre.com/about-us/</a>                                                           |
| Huntington's Disease Association                                  | 296453  | <a href="https://www.hda.org.uk/">https://www.hda.org.uk/</a>                                                                                           |
| Huntington's Disease Youth Organization                           | 1145781 | <a href="https://en.hdyo.org/">https://en.hdyo.org/</a>                                                                                                 |
| IBD Passport                                                      | 1171268 | <a href="https://www.ibdpassport.com/">https://www.ibdpassport.com/</a>                                                                                 |
| Ichthyosis Support Group                                          | 1142457 | <a href="https://www.ichthyosis.org.uk/">https://www.ichthyosis.org.uk/</a>                                                                             |
| Immune Thrombocytopenia Support Association                       | 1064480 | <a href="https://www.itpsupport.org.uk/index.php/en/">https://www.itpsupport.org.uk/index.php/en/</a>                                                   |
| Independent Cancer Patients' Voice                                | 1138456 | <a href="http://www.independentcancerpatientsvoice.org.uk/">http://www.independentcancerpatientsvoice.org.uk/</a>                                       |
| Intensive Care Society                                            | 1039236 | <a href="https://www.ics.ac.uk/">https://www.ics.ac.uk/</a>                                                                                             |
| International Alliance of Patients' Organizations                 | 1155577 | <a href="https://www.iapo.org.uk/">https://www.iapo.org.uk/</a>                                                                                         |
| International Chronic Myeloid Leukemia Foundation                 | 1132984 | <a href="https://www.cml-foundation.org/">https://www.cml-foundation.org/</a>                                                                           |
| International Gaucher Alliance                                    | 1192011 | <a href="https://gaucheralliance.org/home">https://gaucheralliance.org/home</a>                                                                         |
| International Headache Society                                    | 1042574 | <a href="https://ihs-headache.org/en/">https://ihs-headache.org/en/</a>                                                                                 |
| International Longevity Centre UK                                 | 1080496 | <a href="https://ilcuk.org.uk/">https://ilcuk.org.uk/</a>                                                                                               |
| International Niemann-Pick Disease Alliance                       | 1150256 | <a href="https://www.inpda.org/">https://www.inpda.org/</a>                                                                                             |
| International Niemann-Pick Disease Registry                       | 1175311 | <a href="https://inpdr.org/">https://inpdr.org/</a>                                                                                                     |
| International Patient Organisation for Primary Immunodeficiencies | 1058005 | <a href="https://ipopi.org/">https://ipopi.org/</a>                                                                                                     |
| Isabel Hospice Limited                                            | 1046826 | <a href="https://www.isabelhospice.org.uk/">https://www.isabelhospice.org.uk/</a>                                                                       |

|    |                                       |         |                                                                                                                                                                                                               |
|----|---------------------------------------|---------|---------------------------------------------------------------------------------------------------------------------------------------------------------------------------------------------------------------|
| 1  | Isle of Wight Diabetic Fund           | 298933  | <a href="https://www.charitychoice.co.uk/isle-of-wight-diabetic-fund-142014">https://www.charitychoice.co.uk/isle-of-wight-diabetic-fund-142014</a>                                                           |
| 2  | Jo's Cervical Cancer Trust            | 1133542 | <a href="https://www.jostrust.org.uk/">https://www.jostrust.org.uk/</a>                                                                                                                                       |
| 3  | Juvenile Diabetes Research Foundation | 295716  | <a href="https://jdrf.org.uk/">https://jdrf.org.uk/</a>                                                                                                                                                       |
| 4  | Karen Clifford Skcin cancer charity   | 1150048 | <a href="https://www.skcin.org/">https://www.skcin.org/</a>                                                                                                                                                   |
| 5  | Katie Piper Foundation                | 1133313 | <a href="https://katiepiperfoundation.org.uk/">https://katiepiperfoundation.org.uk/</a>                                                                                                                       |
| 6  | Kent Autistic Trust                   | 801965  | <a href="https://www.kentautistictrust.org/">https://www.kentautistictrust.org/</a>                                                                                                                           |
| 7  | Kent MS Therapy Centre                | 801382  | <a href="https://kentmstc.org.uk/">https://kentmstc.org.uk/</a>                                                                                                                                               |
| 8  | Kidney Cancer Support Network         | 1164238 | <a href="https://actionkidneycancer.org/">https://actionkidneycancer.org/</a>                                                                                                                                 |
| 9  | Kidney Cancer UK                      | 1120146 | <a href="https://www.kcuk.org.uk/">https://www.kcuk.org.uk/</a>                                                                                                                                               |
| 10 | Kidney Care UK                        | 270288  | <a href="https://www.kidneycareuk.org/">https://www.kidneycareuk.org/</a>                                                                                                                                     |
| 11 | Kidney Research UK                    | 252892  | <a href="https://www.kidneyresearchuk.org/">https://www.kidneyresearchuk.org/</a>                                                                                                                             |
| 12 | Legs Matter                           | 1180844 | <a href="https://legsmatter.org/">https://legsmatter.org/</a>                                                                                                                                                 |
| 13 | Leukaemia CARE                        | 1183890 | <a href="https://www.leukaemiacare.org.uk/">https://www.leukaemiacare.org.uk/</a>                                                                                                                             |
| 14 | Leukaemia UK                          | 1154856 | <a href="https://www.leukaemiauk.org.uk/">https://www.leukaemiauk.org.uk/</a>                                                                                                                                 |
| 15 | Lipodystrophy UK                      | 1175462 | <a href="https://register-of-charities.charitycommission.gov.uk/charity-search/-/charity-details/5111931">https://register-of-charities.charitycommission.gov.uk/charity-search/-/charity-details/5111931</a> |
| 16 | Liver4Life                            | 1152618 | <a href="https://www.liver4life.org.uk/">https://www.liver4life.org.uk/</a>                                                                                                                                   |
| 17 | LIVERNORTH                            | 1087226 | <a href="http://www.livernorth.org.uk/">http://www.livernorth.org.uk/</a>                                                                                                                                     |
| 18 | Lupus UK                              | 1051610 | <a href="https://www.lupusuk.org.uk/">https://www.lupusuk.org.uk/</a>                                                                                                                                         |
| 19 | Lymphoma Action                       | 1068395 | <a href="https://lymphoma-action.org.uk/about-us">https://lymphoma-action.org.uk/about-us</a>                                                                                                                 |
| 20 | Macmillan Cancer Support              | 261017  | <a href="https://www.macmillan.org.uk/">https://www.macmillan.org.uk/</a>                                                                                                                                     |
| 21 | Marie Curie Cancer Care               | 207994  | <a href="https://www.mariecurie.org.uk/">https://www.mariecurie.org.uk/</a>                                                                                                                                   |
| 22 | Mavis Nye Foundation                  | 1172765 | <a href="http://www.mavisnyefoundation.com/">http://www.mavisnyefoundation.com/</a>                                                                                                                           |
| 23 | Maypole Project                       | 1120163 | <a href="https://www.themaypoleproject.co.uk/">https://www.themaypoleproject.co.uk/</a>                                                                                                                       |
| 24 | MDS UK Support Group                  | 1145214 | <a href="https://mdspatientsupport.org.uk/">https://mdspatientsupport.org.uk/</a>                                                                                                                             |
| 25 | Meath Epilepsy Charity                | 200359  | <a href="https://www.meath.org.uk/">https://www.meath.org.uk/</a>                                                                                                                                             |
| 26 | Medics 4 Rare Diseases                | 1183996 | <a href="https://www.m4rd.org/history/">https://www.m4rd.org/history/</a>                                                                                                                                     |
| 27 | Melanoma Focus                        | 1124716 | <a href="https://melanomafocus.org/">https://melanomafocus.org/</a>                                                                                                                                           |
| 28 | Melanoma Fund                         | 1085969 | <a href="https://www.melanoma-fund.co.uk/">https://www.melanoma-fund.co.uk/</a>                                                                                                                               |
| 29 | Melanoma UK                           | 1157635 | <a href="https://www.melanomauk.org.uk/">https://www.melanomauk.org.uk/</a>                                                                                                                                   |
| 30 | Memorylane Eastbourne                 | 1163541 | <a href="https://www.memorylaneeastbourne.co.uk/">https://www.memorylaneeastbourne.co.uk/</a>                                                                                                                 |
| 31 | Men's Health Forum                    | 1087375 | <a href="https://www.menshealthforum.org.uk/">https://www.menshealthforum.org.uk/</a>                                                                                                                         |
| 32 | Meningitis Now                        | 803016  | <a href="https://www.meningitisnow.org/">https://www.meningitisnow.org/</a>                                                                                                                                   |
| 33 | Meningitis Research Foundation        | 1091105 | <a href="https://www.meningitis.org/">https://www.meningitis.org/</a>                                                                                                                                         |
| 34 | Mental Health Foundation              | 801130  | <a href="https://www.mentalhealth.org.uk/">https://www.mentalhealth.org.uk/</a>                                                                                                                               |
| 35 | Mental Health UK                      | 1170815 | <a href="https://mentalhealth-uk.org/">https://mentalhealth-uk.org/</a>                                                                                                                                       |
| 36 | Mersey Region Epilepsy Association    | 504366  | <a href="https://www.epilepsymersey.org.uk/">https://www.epilepsymersey.org.uk/</a>                                                                                                                           |
| 37 | Mesothelioma UK                       | 1177039 | <a href="https://www.mesothelioma.uk.com/">https://www.mesothelioma.uk.com/</a>                                                                                                                               |
| 38 | Metabolic Support UK                  | 1089588 | <a href="https://www.metabolicsupportuk.org/">https://www.metabolicsupportuk.org/</a>                                                                                                                         |
| 39 | Migraine Trust                        | 1081300 | <a href="https://migrainetrust.org/">https://migrainetrust.org/</a>                                                                                                                                           |
| 40 | MLD Support Association UK            | 1150542 | <a href="https://www.mldsupportuk.org.uk/">https://www.mldsupportuk.org.uk/</a>                                                                                                                               |

|                                                       |         |                                                                                                                                                             |
|-------------------------------------------------------|---------|-------------------------------------------------------------------------------------------------------------------------------------------------------------|
| Motor Neurone Disease Association                     | 294354  | <a href="https://www.mndassociation.org/">https://www.mndassociation.org/</a>                                                                               |
| Mouth Cancer Foundation                               | 1109298 | <a href="https://www.mouthcancerfoundation.org/">https://www.mouthcancerfoundation.org/</a>                                                                 |
| Multiple Sclerosis International Federation           | 1105321 | <a href="https://www.msif.org/">https://www.msif.org/</a>                                                                                                   |
| Multiple Sclerosis Society UK                         | 1139257 | <a href="https://www.mssociety.org.uk/">https://www.mssociety.org.uk/</a>                                                                                   |
| Multiple Sclerosis Therapy Centres                    | 1031690 | <a href="https://www.msntc.org.uk/">https://www.msntc.org.uk/</a>                                                                                           |
| Multiple Sclerosis Trust                              | 1088353 | <a href="https://mstrust.org.uk/">https://mstrust.org.uk/</a>                                                                                               |
| Muscular Dystrophy UK                                 | 205395  | <a href="https://www.muscular dystrophyuk.org/">https://www.muscular dystrophyuk.org/</a>                                                                   |
| MYFANWY TOWNSEND                                      | 1085969 | <a href="https://doit.life/organisation/myfanwy-townsend-melanoma-research-fund">https://doit.life/organisation/myfanwy-townsend-melanoma-research-fund</a> |
| Narcolepsy UK                                         | 1144342 | <a href="https://www.narcolepsy.org.uk/">https://www.narcolepsy.org.uk/</a>                                                                                 |
| National AIDS Map                                     | 1011220 | <a href="https://www.aidsmap.com/">https://www.aidsmap.com/</a>                                                                                             |
| National AIDS Trust                                   | 297977  | <a href="https://www.nat.org.uk/">https://www.nat.org.uk/</a>                                                                                               |
| National Axial Spondyloarthritis Society              | 1183175 | <a href="https://nass.co.uk/">https://nass.co.uk/</a>                                                                                                       |
| National Cancer Research Institute                    | 1160609 | <a href="https://www.ncri.org.uk/">https://www.ncri.org.uk/</a>                                                                                             |
| National Eczema Society                               | 1009671 | <a href="https://eczema.org/">https://eczema.org/</a>                                                                                                       |
| National Federation of Prostate Cancer Support Groups | 1163152 | <a href="https://tackleprostate.org/">https://tackleprostate.org/</a>                                                                                       |
| National Kidney Federation                            | 1106735 | <a href="https://www.kidney.org.uk/">https://www.kidney.org.uk/</a>                                                                                         |
| National Migraine Centre                              | 1115935 | <a href="https://www.nationalmigrainecentre.org.uk/">https://www.nationalmigrainecentre.org.uk/</a>                                                         |
| National Rheumatoid Arthritis Society                 | 1134859 | <a href="https://nras.org.uk/">https://nras.org.uk/</a>                                                                                                     |
| National Voices                                       | 1057711 | <a href="https://www.nationalvoices.org.uk/">https://www.nationalvoices.org.uk/</a>                                                                         |
| NAZ                                                   | 1014056 | <a href="https://www.naz.org.uk/">https://www.naz.org.uk/</a>                                                                                               |
| Neuroendocrine Cancer UK                              | 1092386 | <a href="https://www.neuroendocrinecancer.org.uk/">https://www.neuroendocrinecancer.org.uk/</a>                                                             |
| Neurological Alliance                                 | 1039034 | <a href="https://www.neural.org.uk/">https://www.neural.org.uk/</a>                                                                                         |
| NHS Charities Together                                | 1186569 | <a href="https://nhscharitiestogether.co.uk/">https://nhscharitiestogether.co.uk/</a>                                                                       |
| Niemann-Pick UK                                       | 1144406 | <a href="https://www.npuk.org/">https://www.npuk.org/</a>                                                                                                   |
| NMO Spectrum UK                                       | 1158104 | <a href="http://www.nmouk.nhs.uk/resources-useful-links/nmo-spectrum-uk">http://www.nmouk.nhs.uk/resources-useful-links/nmo-spectrum-uk</a>                 |
| North Bristol NHS Trust                               | 1055900 | <a href="https://www.nbt.nhs.uk/">https://www.nbt.nhs.uk/</a>                                                                                               |
| Oliver King Foundation                                | 1144485 | <a href="https://theoliverkingfoundation.co.uk/">https://theoliverkingfoundation.co.uk/</a>                                                                 |
| Oral Health Foundation                                | 263198  | <a href="https://www.dentalhealth.org/">https://www.dentalhealth.org/</a>                                                                                   |
| Orchid                                                | 1080540 | <a href="https://orchid-cancer.org.uk/">https://orchid-cancer.org.uk/</a>                                                                                   |
| Osteoporosis Dorset                                   | 1023507 | <a href="https://www.osteodorset.org.uk/">https://www.osteodorset.org.uk/</a>                                                                               |
| Ovacome                                               | 1159682 | <a href="https://www.ovacome.org.uk/">https://www.ovacome.org.uk/</a>                                                                                       |
| Ovarian Cancer Action                                 | 1109743 | <a href="https://ovarian.org.uk/">https://ovarian.org.uk/</a>                                                                                               |
| Over the Wall                                         | 1075361 | <a href="https://www.otw.org.uk/">https://www.otw.org.uk/</a>                                                                                               |
| Pain UK                                               | 1191657 | <a href="https://painuk.org/">https://painuk.org/</a>                                                                                                       |
| Pancreatic Cancer Action                              | 1137689 | <a href="https://pancreaticcanceraction.org/">https://pancreaticcanceraction.org/</a>                                                                       |
| Pancreatic Cancer UK                                  | 1112708 | <a href="https://www.pancreaticcancer.org.uk/">https://www.pancreaticcancer.org.uk/</a>                                                                     |
| Parkinson's UK                                        | 258197  | <a href="https://www.parkinsons.org.uk/">https://www.parkinsons.org.uk/</a>                                                                                 |
| Paroxysmal Nocturnal Haemoglobinuria Support          | 1161518 | <a href="https://pnhuk.org/">https://pnhuk.org/</a>                                                                                                         |

|    |                                                                           |         |                                                                                                                                                                             |
|----|---------------------------------------------------------------------------|---------|-----------------------------------------------------------------------------------------------------------------------------------------------------------------------------|
| 1  | Patients Association                                                      | 1006733 | <a href="https://www.patients-association.org.uk/">https://www.patients-association.org.uk/</a>                                                                             |
| 2  | Patients On Intravenous and Nasogastric Nutrition Therapy                 | 1157655 | <a href="https://pinnt.com/Home.aspx">https://pinnt.com/Home.aspx</a>                                                                                                       |
| 3  | Paula Carr Diabetes Trust                                                 | 801596  | <a href="https://www.paulacarrdiabetestrust.co.uk/">https://www.paulacarrdiabetestrust.co.uk/</a>                                                                           |
| 4  | Pelican Cancer Foundation                                                 | 1141911 | <a href="https://www.pelicancancer.org/?doing_wp_cron=1645539531.1477270126342773437500">https://www.pelicancancer.org/?doing_wp_cron=1645539531.1477270126342773437500</a> |
| 5  | Phyllis Tuckwell Hospice                                                  | 264501  | <a href="https://www.pth.org.uk/">https://www.pth.org.uk/</a>                                                                                                               |
| 6  | Pilgrims Hospice                                                          | 293968  | <a href="https://www.pilgrimshospices.org/">https://www.pilgrimshospices.org/</a>                                                                                           |
| 7  | Pink Ribbon Foundation                                                    | 1080839 | <a href="https://www.pinkribbonfoundation.org.uk/">https://www.pinkribbonfoundation.org.uk/</a>                                                                             |
| 8  | Pituitary Foundation                                                      | 1058968 | <a href="https://www.pituitary.org.uk/">https://www.pituitary.org.uk/</a>                                                                                                   |
| 9  | Platelet Society                                                          | 1172202 | <a href="https://plateletsociety.co.uk/">https://plateletsociety.co.uk/</a>                                                                                                 |
| 10 | Point Of Care Foundation                                                  | 1151628 | <a href="https://www.pointofcarefoundation.org.uk/">https://www.pointofcarefoundation.org.uk/</a>                                                                           |
| 11 | Polycystic Kidney Disease Charity                                         | 1160970 | <a href="https://pkdcharity.org.uk/">https://pkdcharity.org.uk/</a>                                                                                                         |
| 12 | Pompe Support Network                                                     | 1186383 | <a href="https://pompe.uk/">https://pompe.uk/</a>                                                                                                                           |
| 13 | Positively UK                                                             | 1007685 | <a href="https://positivelyuk.org/">https://positivelyuk.org/</a>                                                                                                           |
| 14 | Prevent Breast Cancer Charity UK                                          | 1109839 | <a href="https://preventbreastcancer.org.uk/">https://preventbreastcancer.org.uk/</a>                                                                                       |
| 15 | Primary Immunodeficiency UK                                               | 1193166 | <a href="http://www.immunodeficiencyuk.org/">http://www.immunodeficiencyuk.org/</a>                                                                                         |
| 16 | Progress Educational Trust                                                | 1139856 | <a href="https://www.progress.org.uk/">https://www.progress.org.uk/</a>                                                                                                     |
| 17 | Progressive Supranuclear Palsy Association                                | 1037087 | <a href="https://pspassociation.org.uk/">https://pspassociation.org.uk/</a>                                                                                                 |
| 18 | Prostate Cancer UK                                                        | 1005541 | <a href="https://prostatecanceruk.org/">https://prostatecanceruk.org/</a>                                                                                                   |
| 19 | Psoriasis Association                                                     | 1180666 | <a href="https://www.psoriasis-association.org.uk/">https://www.psoriasis-association.org.uk/</a>                                                                           |
| 20 | Pulmonary Fibrosis Trust                                                  | 1149901 | <a href="https://pulmonaryfibrosistrust.org/">https://pulmonaryfibrosistrust.org/</a>                                                                                       |
| 21 | Pulmonary Hypertension Association UK                                     | 1120756 | <a href="https://www.phauk.org/">https://www.phauk.org/</a>                                                                                                                 |
| 22 | Pumping Marvellous Foundation                                             | 1151848 | <a href="https://www.pumpingmarvellous.org/">https://www.pumpingmarvellous.org/</a>                                                                                         |
| 23 | Rainbow Trust Children's Charity                                          | 1070532 | <a href="https://www.rainbowtrust.org.uk/">https://www.rainbowtrust.org.uk/</a>                                                                                             |
| 24 | Rapid Effective Assistance For Children With Potentially Terminal Illness | 802440  | <a href="https://reactcharity.org/">https://reactcharity.org/</a>                                                                                                           |
| 25 | Rare Autoinflammatory Conditions Community                                | 1184846 | <a href="https://raccuk.com/">https://raccuk.com/</a>                                                                                                                       |
| 26 | Red Rose Recovery                                                         | 1152474 | <a href="https://redroserecovery.org.uk/">https://redroserecovery.org.uk/</a>                                                                                               |
| 27 | Reform                                                                    | 1103739 | <a href="https://reform.uk/">https://reform.uk/</a>                                                                                                                         |
| 28 | Release                                                                   | 801118  | <a href="https://www.release.org.uk/">https://www.release.org.uk/</a>                                                                                                       |
| 29 | Rethink Mental Illness                                                    | 271028  | <a href="https://www.rethink.org/">https://www.rethink.org/</a>                                                                                                             |
| 30 | Retina UK                                                                 | 1153851 | <a href="https://retinauk.org.uk/about/">https://retinauk.org.uk/about/</a>                                                                                                 |
| 31 | Reverse Rett                                                              | 1136809 | <a href="https://www.reverserett.org.uk/">https://www.reverserett.org.uk/</a>                                                                                               |
| 32 | Ring 20 Research & Support UK                                             | 1165651 | <a href="https://ring20researchsupport.co.uk/">https://ring20researchsupport.co.uk/</a>                                                                                     |
| 33 | Roald Dahl's Marvellous Children's                                        | 1137409 | <a href="https://www.roalddahlcharity.org/">https://www.roalddahlcharity.org/</a>                                                                                           |
| 34 | Roy Castle Lung Cancer Foundation                                         | 1046854 | <a href="https://roycastle.org/">https://roycastle.org/</a>                                                                                                                 |

|                                                            |         |                                                                                                                                                                                                                                       |
|------------------------------------------------------------|---------|---------------------------------------------------------------------------------------------------------------------------------------------------------------------------------------------------------------------------------------|
| Royal Free Charity                                         | 1165672 | <a href="https://royalfreecharity.org/">https://royalfreecharity.org/</a>                                                                                                                                                             |
| Royal Manchester Children's Hospital                       | 1049274 | <a href="https://mft.nhs.uk/rmch/">https://mft.nhs.uk/rmch/</a>                                                                                                                                                                       |
| Royal National Institute of Blind People                   | 226227  | <a href="https://www.rnib.org.uk/">https://www.rnib.org.uk/</a>                                                                                                                                                                       |
| Royal Osteoporosis Society                                 | 1102712 | <a href="https://theros.org.uk/">https://theros.org.uk/</a>                                                                                                                                                                           |
| Ruth Strauss Foundation                                    | 1183221 | <a href="https://ruthstraussfoundation.com/">https://ruthstraussfoundation.com/</a>                                                                                                                                                   |
| Salivary Gland Cancer UK                                   | 1182762 | <a href="https://www.salivaryglandcancer.uk/">https://www.salivaryglandcancer.uk/</a>                                                                                                                                                 |
| SANE                                                       | 296572  | <a href="https://www.sane.org.uk/">https://www.sane.org.uk/</a>                                                                                                                                                                       |
| Sarcoma UK                                                 | 1139869 | <a href="https://sarcoma.org.uk/">https://sarcoma.org.uk/</a>                                                                                                                                                                         |
| Scleroderma and Raynauds UK                                | 1161828 | <a href="https://www.sruk.co.uk/">https://www.sruk.co.uk/</a>                                                                                                                                                                         |
| Sexual Advice Association                                  | 1104691 | <a href="https://sexualadviceassociation.co.uk/">https://sexualadviceassociation.co.uk/</a>                                                                                                                                           |
| Shift.MS                                                   | 1117194 | <a href="https://shift.ms/">https://shift.ms/</a>                                                                                                                                                                                     |
| Shine Cancer Support                                       | 1146902 | <a href="https://shinecancersupport.org/">https://shinecancersupport.org/</a>                                                                                                                                                         |
| Sickle Cell and Young Stroke Survivor                      | 1120902 | <a href="http://www.scyss.org/">http://www.scyss.org/</a>                                                                                                                                                                             |
| Sickle Cell Society                                        | 1046631 | <a href="https://www.sicklecellsociety.org/">https://www.sicklecellsociety.org/</a>                                                                                                                                                   |
| Sightsavers India                                          | 207544  | <a href="https://www.sightsaversindia.in/">https://www.sightsaversindia.in/</a>                                                                                                                                                       |
| Skinship UK                                                | 1047108 | <a href="https://skinshipuk.org/">https://skinshipuk.org/</a>                                                                                                                                                                         |
| Society for Mucopolysaccharide Diseases                    | 1143472 | <a href="https://www.mpsociety.org.uk/">https://www.mpsociety.org.uk/</a>                                                                                                                                                             |
| Solving Kids' Cancer                                       | 1135601 | <a href="https://www.solvingkidscancer.org.uk/">https://www.solvingkidscancer.org.uk/</a>                                                                                                                                             |
| Somerville Foundation                                      | 1138088 | <a href="https://sfhearts.org.uk/">https://sfhearts.org.uk/</a>                                                                                                                                                                       |
| Sophia Forum                                               | 1131629 | <a href="https://sophiaforum.net/">https://sophiaforum.net/</a>                                                                                                                                                                       |
| South Asian Health Foundation                              | 1073178 | <a href="https://www.sahf.org.uk/">https://www.sahf.org.uk/</a>                                                                                                                                                                       |
| South of England Neuroscience Association                  | 1198001 | <a href="https://www.sena.org.uk/">https://www.sena.org.uk/</a>                                                                                                                                                                       |
| Spinal Injuries Association                                | 1054097 | <a href="https://www.spinal.co.uk/">https://www.spinal.co.uk/</a>                                                                                                                                                                     |
| Spinal Muscular Atrophy Support UK                         | 1106815 | <a href="https://smauk.org.uk/">https://smauk.org.uk/</a>                                                                                                                                                                             |
| St Elizabeths Centre                                       | 1176777 | <a href="https://www.stelizabeths.org.uk/">https://www.stelizabeths.org.uk/</a>                                                                                                                                                       |
| Stroke Association                                         | 211015  | <a href="https://www.stroke.org.uk/">https://www.stroke.org.uk/</a>                                                                                                                                                                   |
| Swallows Head and Neck Cancer Charity                      | 1149794 | <a href="https://www.theswallows.org.uk/">https://www.theswallows.org.uk/</a>                                                                                                                                                         |
| Target Ovarian Cancer                                      | 1125038 | <a href="https://targetovariancancer.org.uk/">https://targetovariancancer.org.uk/</a>                                                                                                                                                 |
| Teenage Cancer Trust                                       | 1062559 | <a href="https://www.teenagecancertrust.org/">https://www.teenagecancertrust.org/</a>                                                                                                                                                 |
| Tenovus Cancer Care                                        | 1054015 | <a href="https://www.tenovuscancercare.org.uk/">https://www.tenovuscancercare.org.uk/</a>                                                                                                                                             |
| Terrence Higgins Trust                                     | 288527  | <a href="https://www.tht.org.uk/">https://www.tht.org.uk/</a>                                                                                                                                                                         |
| THE MACULAR DISEASE SOCIETY                                | 1001198 |                                                                                                                                                                                                                                       |
| THE NATIONAL ASSOCIATION FOR THE RELIEF OF PAGET'S DISEASE | 266071  | <a href="https://paget.org.uk/">https://paget.org.uk/</a>                                                                                                                                                                             |
| Theodora Children's Charity                                | 1094532 | <a href="https://uk.theodora.org/">https://uk.theodora.org/</a>                                                                                                                                                                       |
| Thrombosis UK                                              | 1090540 | <a href="https://thrombosisuk.org/news/post.php?s=2021-10-11-thrombosis-uk-winner-of-activity-of-the-year-award-2021">https://thrombosisuk.org/news/post.php?s=2021-10-11-thrombosis-uk-winner-of-activity-of-the-year-award-2021</a> |
| Tiny Tickers                                               | 1078114 | <a href="https://www.tinytickers.org/">https://www.tinytickers.org/</a>                                                                                                                                                               |



|                                                    |         |                                                                                                                                                                                                                                     |
|----------------------------------------------------|---------|-------------------------------------------------------------------------------------------------------------------------------------------------------------------------------------------------------------------------------------|
| Together for Short Lives                           |         |                                                                                                                                                                                                                                     |
| Trekstock                                          | 1132421 | <a href="https://www.trekstock.com/">https://www.trekstock.com/</a>                                                                                                                                                                 |
| Trevi                                              | 1075433 | <a href="https://trevi.org.uk/">https://trevi.org.uk/</a>                                                                                                                                                                           |
| Tuberous Sclerosis Association                     | 1039549 | <a href="https://tuberous-sclerosis.org/">https://tuberous-sclerosis.org/</a>                                                                                                                                                       |
| Turner Syndrome Support Society                    | 1080507 | <a href="https://tss.org.uk/">https://tss.org.uk/</a>                                                                                                                                                                               |
| Twins Trust                                        | 1076478 | <a href="https://twinstrust.org/">https://twinstrust.org/</a>                                                                                                                                                                       |
| UK ATTR AMYLOIDOSIS PATIENTS' ASSOCIATION (UKATPA) | 1183624 | <a href="https://register-of-charities.charitycommission.gov.uk/charity-details/?regid=1183624&amp;subid=0">https://register-of-charities.charitycommission.gov.uk/charity-details/?regid=1183624&amp;subid=0</a>                   |
| UK Breast Cancer Group                             | 1177296 | <a href="https://ukbcg.org/">https://ukbcg.org/</a>                                                                                                                                                                                 |
| UK Mastocytosis Support Group                      | 1154007 | <a href="https://ukmasto.org/#gsc.tab=0">https://ukmasto.org/#gsc.tab=0</a>                                                                                                                                                         |
| UK National Intrathecal Baclofen Trust             | 1129812 | <a href="https://register-of-charities.charitycommission.gov.uk/charity-search/-/charity-details/4043971/full-print">https://register-of-charities.charitycommission.gov.uk/charity-search/-/charity-details/4043971/full-print</a> |
| UK Primary Immune-deficiency Patient Support       | 1148789 | <a href="https://ukpips.org.uk/">https://ukpips.org.uk/</a>                                                                                                                                                                         |
| UK Thalassaemia Society                            | 275107  | <a href="https://ukts.org/">https://ukts.org/</a>                                                                                                                                                                                   |
| University College London Hospitals Charity        | 1165398 | <a href="https://www.uclhcharity.org.uk/">https://www.uclhcharity.org.uk/</a>                                                                                                                                                       |
| University Hospitals Coventry and Warwickshire     | 1165393 | <a href="https://www.uhcw.nhs.uk/">https://www.uhcw.nhs.uk/</a>                                                                                                                                                                     |
| Urology Cancer Research and Education              | 1120887 | <a href="http://www.ucare-oxford.org.uk/">http://www.ucare-oxford.org.uk/</a>                                                                                                                                                       |
| Vascular Society of Britain and Ireland            | 1102769 | <a href="https://www.vascularsociety.org.uk/default.aspx">https://www.vascularsociety.org.uk/default.aspx</a>                                                                                                                       |
| Vasculitis UK                                      | 1180473 | <a href="https://www.vasculitis.org.uk/">https://www.vasculitis.org.uk/</a>                                                                                                                                                         |
| Versus Arthritis                                   | 207711  | <a href="https://www.versusarthritis.org/">https://www.versusarthritis.org/</a>                                                                                                                                                     |
| Versus Arthritis UK                                | 207711  | <a href="https://www.versusarthritis.org/">https://www.versusarthritis.org/</a>                                                                                                                                                     |
| Virginia Keiley Benefaction                        | 1038091 | <a href="https://givesuper.co.uk/charityDetails/1038091">https://givesuper.co.uk/charityDetails/1038091</a>                                                                                                                         |
| Visionary                                          | 1135360 | <a href="https://www.visionary.org.uk/">https://www.visionary.org.uk/</a>                                                                                                                                                           |
| Waldenstrom's Macroglobulinaemia UK                | 1187121 | <a href="https://wmuk.org.uk/">https://wmuk.org.uk/</a>                                                                                                                                                                             |
| Walton Centre                                      | 1050050 | <a href="https://www.thewaltoncentre.nhs.uk/">https://www.thewaltoncentre.nhs.uk/</a>                                                                                                                                               |
| White Chapel Mission                               | 227905  | <a href="https://whitechapel.org.uk/">https://whitechapel.org.uk/</a>                                                                                                                                                               |
| World Cancer Research Fund                         | 1000739 | <a href="https://www.wcrf-uk.org/">https://www.wcrf-uk.org/</a>                                                                                                                                                                     |
| World Child Cancer                                 | 1084729 | <a href="https://worldchildcancer.org/">https://worldchildcancer.org/</a>                                                                                                                                                           |
| Yorkshire Cancer Research                          | 516898  | <a href="https://yorkshirecancerresearch.org.uk/">https://yorkshirecancerresearch.org.uk/</a>                                                                                                                                       |
| Young Epilepsy                                     | 311877  | <a href="https://www.youngpilepsy.org.uk/">https://www.youngpilepsy.org.uk/</a>                                                                                                                                                     |
| Young Lives vs Cancer                              | 1107328 | <a href="https://www.younglivesvscancer.org.uk/">https://www.younglivesvscancer.org.uk/</a>                                                                                                                                         |

### Inclusion/exclusion of patient organisations

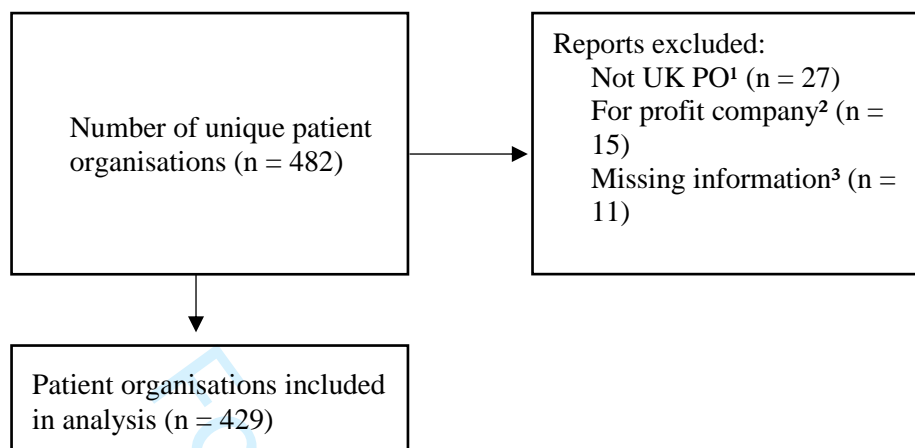

<sup>1</sup>Not aligned with geographical scope e.g. Irish, US-based

<sup>2</sup>Not aligned with EFPIA's definition of patient organisation

<sup>3</sup>Organisations for whose nature is unclear i.e. patient organisation website could not be identified

## Additional tables and figures

Table 7. Number of funding companies, top funder and highest payment for the top five receiving patient organisations

| <u>Patient organisations</u>                                      | <u>Number of funding companies</u> | <u>Top funder</u> | <u>Overall funding (in 2020 GBP)</u> | <u>Highest payment (in 2020 GBP)</u> | <u>Top funder share of overall funding*</u> | <u>Top funder interest†</u> |
|-------------------------------------------------------------------|------------------------------------|-------------------|--------------------------------------|--------------------------------------|---------------------------------------------|-----------------------------|
| <b>Rare</b>                                                       |                                    |                   |                                      |                                      |                                             |                             |
| Cystic Fibrosis Trust                                             | 1                                  | Chiesi            | £ 1,305,512                          | £ 440,229                            | 100%                                        | <i>Definitely yes</i>       |
| Myeloma UK                                                        | 8                                  | Celgene           | £ 1,243,519                          | £ 112,988                            | 34%                                         | <i>Definitely yes</i>       |
| Genetic Alliance UK                                               | 15                                 | Alexion           | £ 613,006                            | £ 50,325                             | 25%                                         | <i>Definitely yes</i>       |
| International Patient Organisation for Primary Immunodeficiencies | 5                                  | Shire             | £ 556,357                            | £ 221,450                            | 40%                                         | <i>Definitely yes</i>       |
| Society for Mucopolysaccharide Diseases                           | 6                                  | Sanofi            | £ 651,097                            | £ 91,179                             | 45%                                         | <i>Definitely yes</i>       |
| <b>Non-rare</b>                                                   |                                    |                   |                                      |                                      |                                             |                             |
| Diabetes UK                                                       | 9                                  | Novo Nordisk      | £ 2,389,423                          | £ 207,878                            | 45%                                         | <i>Definitely yes</i>       |
| Epilepsy Society                                                  | 2                                  | UCB               | £ 1,539,749                          | £ 946,300                            | 100%                                        | <i>Definitely yes</i>       |
| Shift.MS                                                          | 5                                  | Sanofi            | £ 1,315,328                          | £ 104,607                            | 26%                                         | <i>Definitely yes</i>       |
| Multiple Sclerosis International Federation                       | 6                                  | Sanofi            | £ 1,279,214                          | £ 164,347                            | 38%                                         | <i>Definitely yes</i>       |
| Asthma + Lung UK                                                  | 11                                 | Seqirus           | £ 994,842                            | £ 96,759                             | 16%                                         | <i>Definitely yes</i>       |

Notes Please note that all data presented in the table refer to the overall study period, from 2018 to 2020.

\*This column indicates the share of overall funding (from 2018-2020) to the relevant patient organisation from their top funder, as indicated in the third column.

†This column the interest (i.e., *Definitely yes*, *Probably yes* or *No*) the top funder of the patient organisation, as indicated in the third column.

**Table 8. Volume and value of payments by company interests broken down rarity of diseases from 2018 to 2020**

| PO type  | Company's interest | Volume; n (%) |           |           | Value: £ (%)     |                  |                   |
|----------|--------------------|---------------|-----------|-----------|------------------|------------------|-------------------|
|          |                    | 2018          | 2019      | 2020      | 2018             | 2019             | 2020              |
| Overall† | Definitely yes     | 488 (53%)     | 554 (52%) | 585 (50%) | £6,983,350 (64%) | £8,319,177 (64%) | £10,700,000 (59%) |
|          | Probably yes       | 369 (40%)     | 425 (40%) | 471 (40%) | £3,137,189 (29%) | £3,844,276 (29%) | £5,743,500 (32%)  |
|          | No*                | 67 (7%)       | 84 (8%)   | 112 (10%) | £813,176 (7%)    | £882,627 (7%)    | £1,566,402 (9%)   |
| Rare     | Definitely yes     | 79 (53%)      | 125 (58%) | 136 (54%) | £1,602,340 (69%) | £2,372,533 (72%) | £2,750,425 (66%)  |
|          | Probably yes       | 59 (40%)      | 79 (38%)  | 124 (45%) | £635,393 (27%)   | £781,688 (24%)   | £1,296,449 (31%)  |
|          | No*                | 10 (7%)       | 11 (5%)   | 13 (5%)   | £91,282 (4%)     | £126,779 (4%)    | £134,015 (3%)     |
| Non-rare | Definitely yes     | 408 (56%)     | 425 (54%) | 443 (55%) | £5,350,194 (67%) | £5,921,218 (65%) | £7,850,393 (62%)  |
|          | Probably yes       | 304 (42%)     | 339 (43%) | 334 (41%) | £2,409,093 (31%) | £3,032,911 (33%) | £4,385,282 (35%)  |
|          | No*                | 17 (2%)       | 24 (3%)   | 30 (4%)   | £231,784 (3%)    | £155,331 (2%)    | £334,352 (3%)     |

Notes: *Definitely yes* indicates payments directed to patient organisations that operated in a disease area (ICD-11 level 4 or higher) for which the company has a product in its portfolio or pipeline. *Probably yes* indicates directed to patient organisations that operated in a disease area (ICD-11 level 3 or lower) for which the company has a product in its portfolio or pipeline. *No* refers to directed to patient organisations that operated in a disease area for which no link could be found to the company's portfolio or pipeline.

The higher the ICD-11, the more specific the condition. For example, if the ICD-11 level 4 is *Plasma cell neoplasms*, level 2 would be *Neoplasms of hematopoietic or lymphoid tissues*. Further details on how this variable was constructed can be found in the Supplemental Material.

\*Please note that the *No* category of interest conservatively includes also interests that were considered as unclear.

†Please note that the *Overall* results are not a sum of the *Rare* and *Non-rare* results, as they also include patient organisations that could not be classified in either group.

Figure 2 Value of payments by receiving patient organisation and funding company, broken down by year

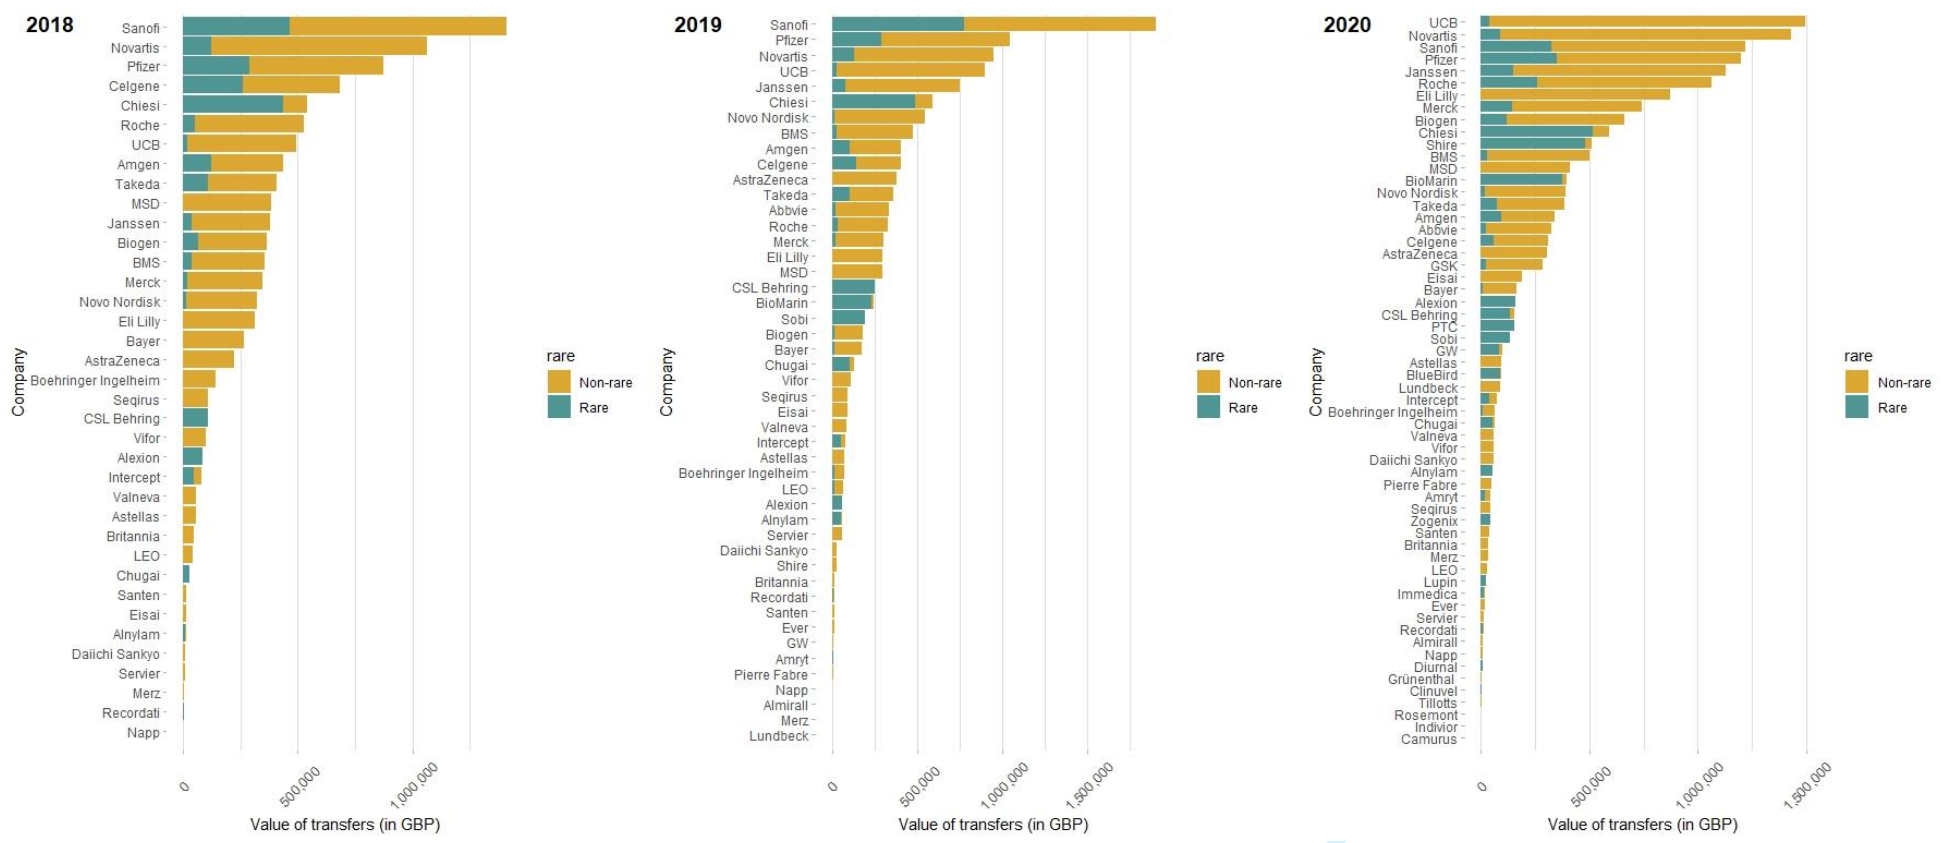

1  
2  
3  
4  
5  
6  
7  
8  
9  
10  
11  
12  
13  
14  
15  
16  
17  
18  
19  
20  
21  
22  
23  
24  
25  
26  
27  
28  
29  
30  
31  
32  
33  
34  
35  
36  
37  
38  
39  
40  
41  
42  
43  
44  
45  
46

**Figure 3. Value of payments by patient organisation type, therapeutic area and year**

A)

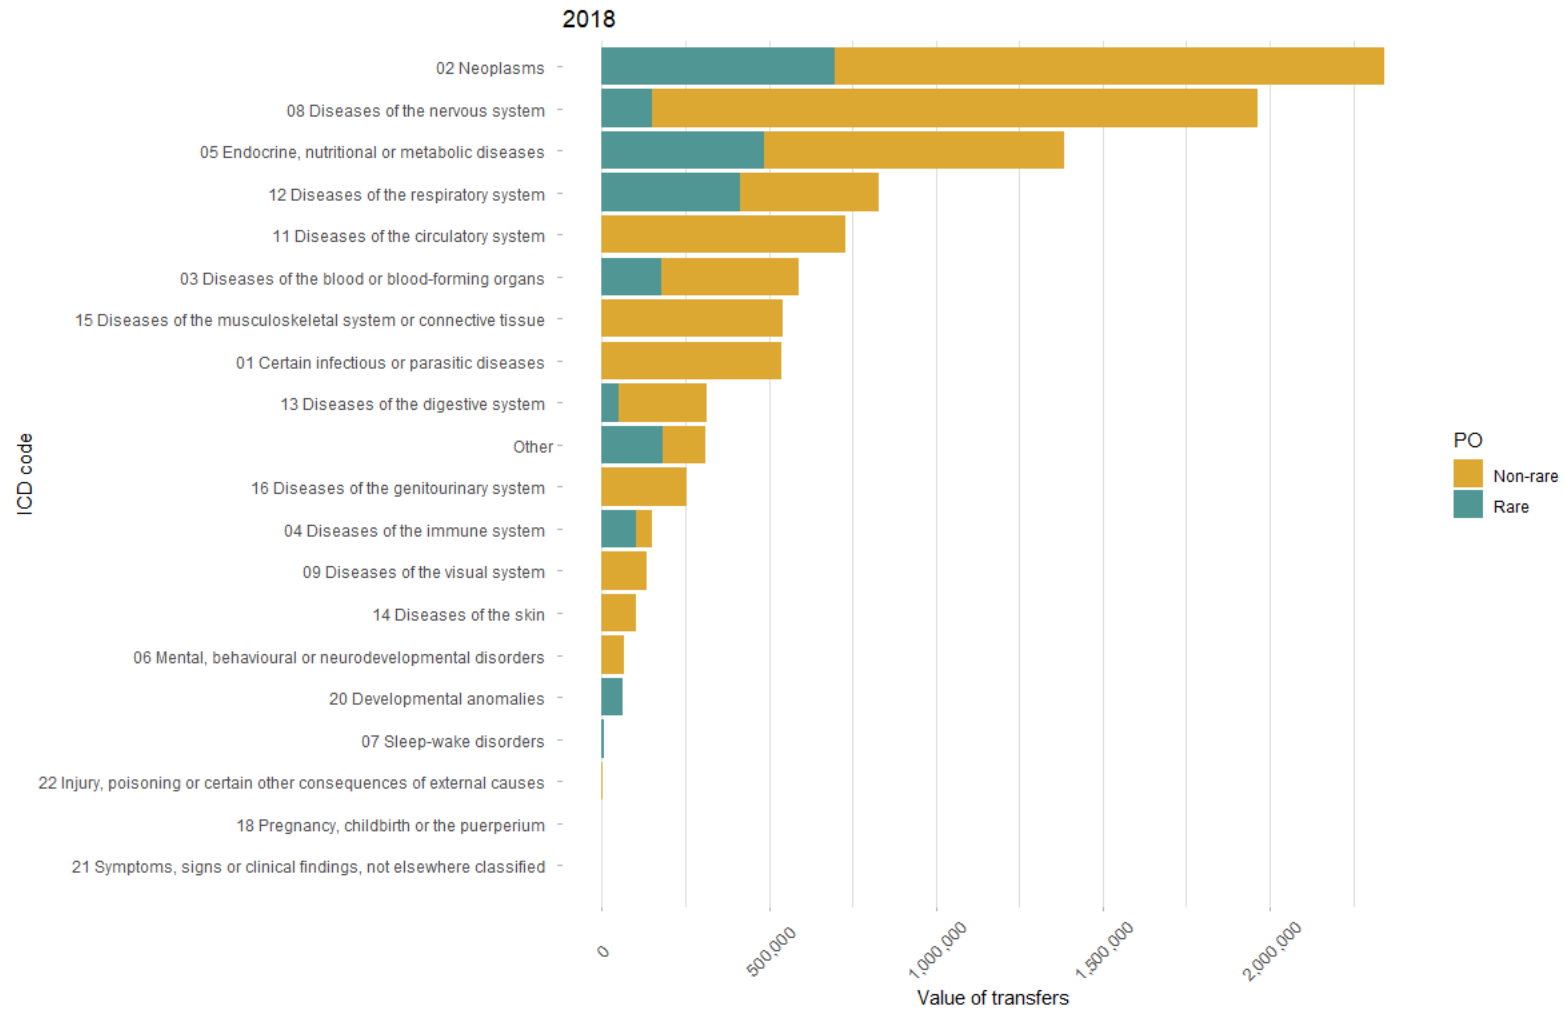

B)

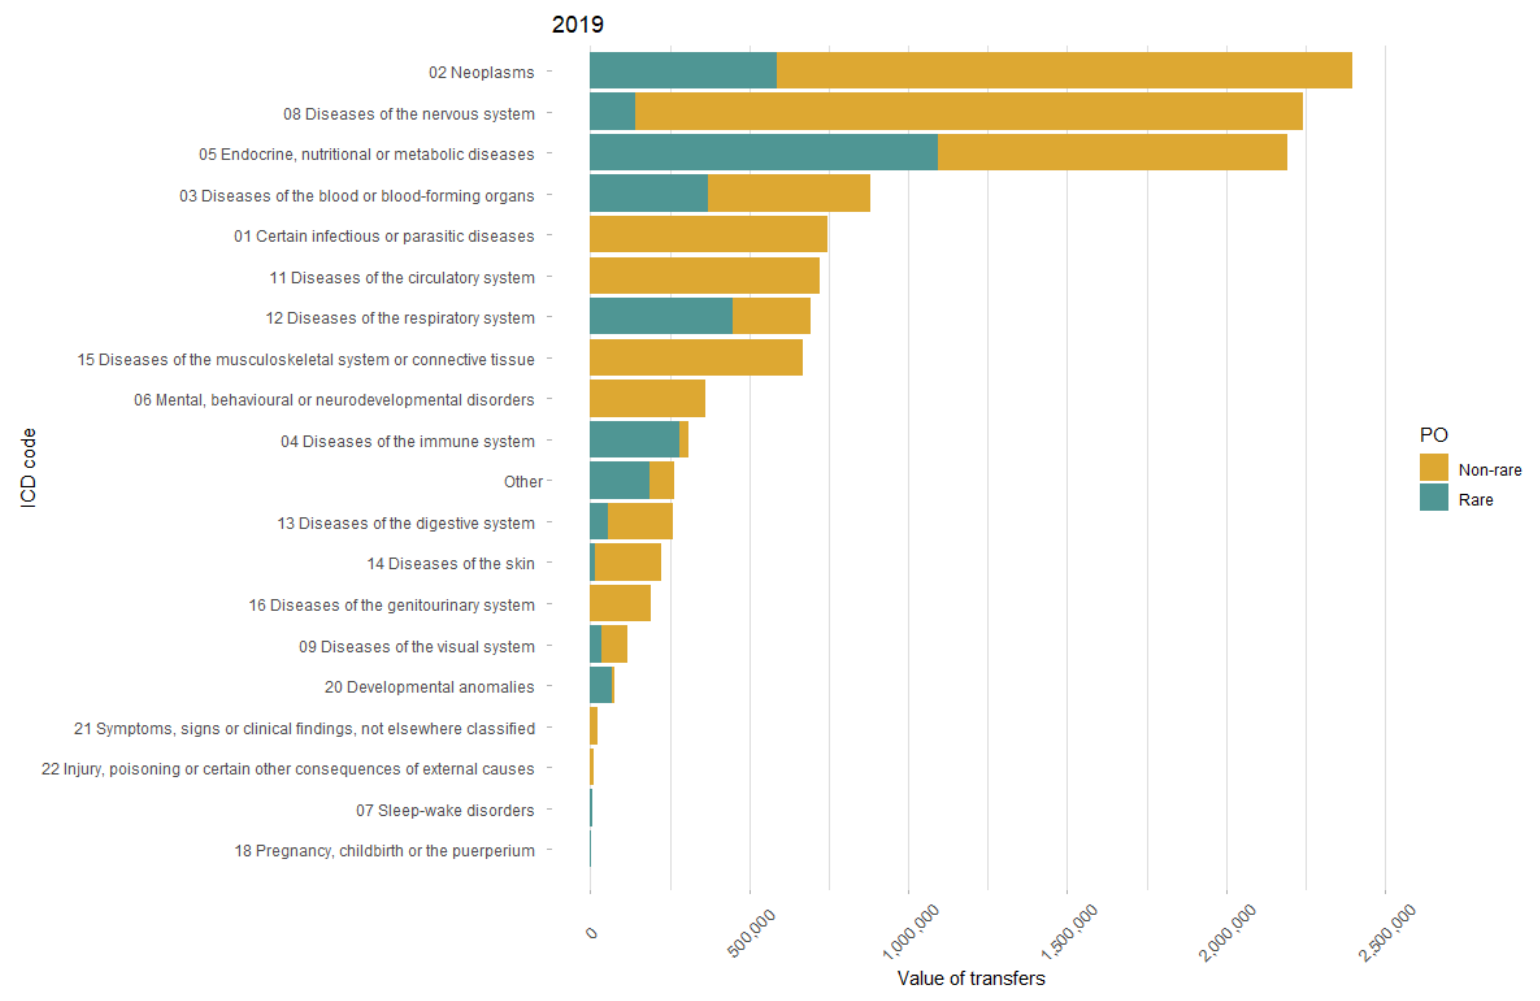

C)

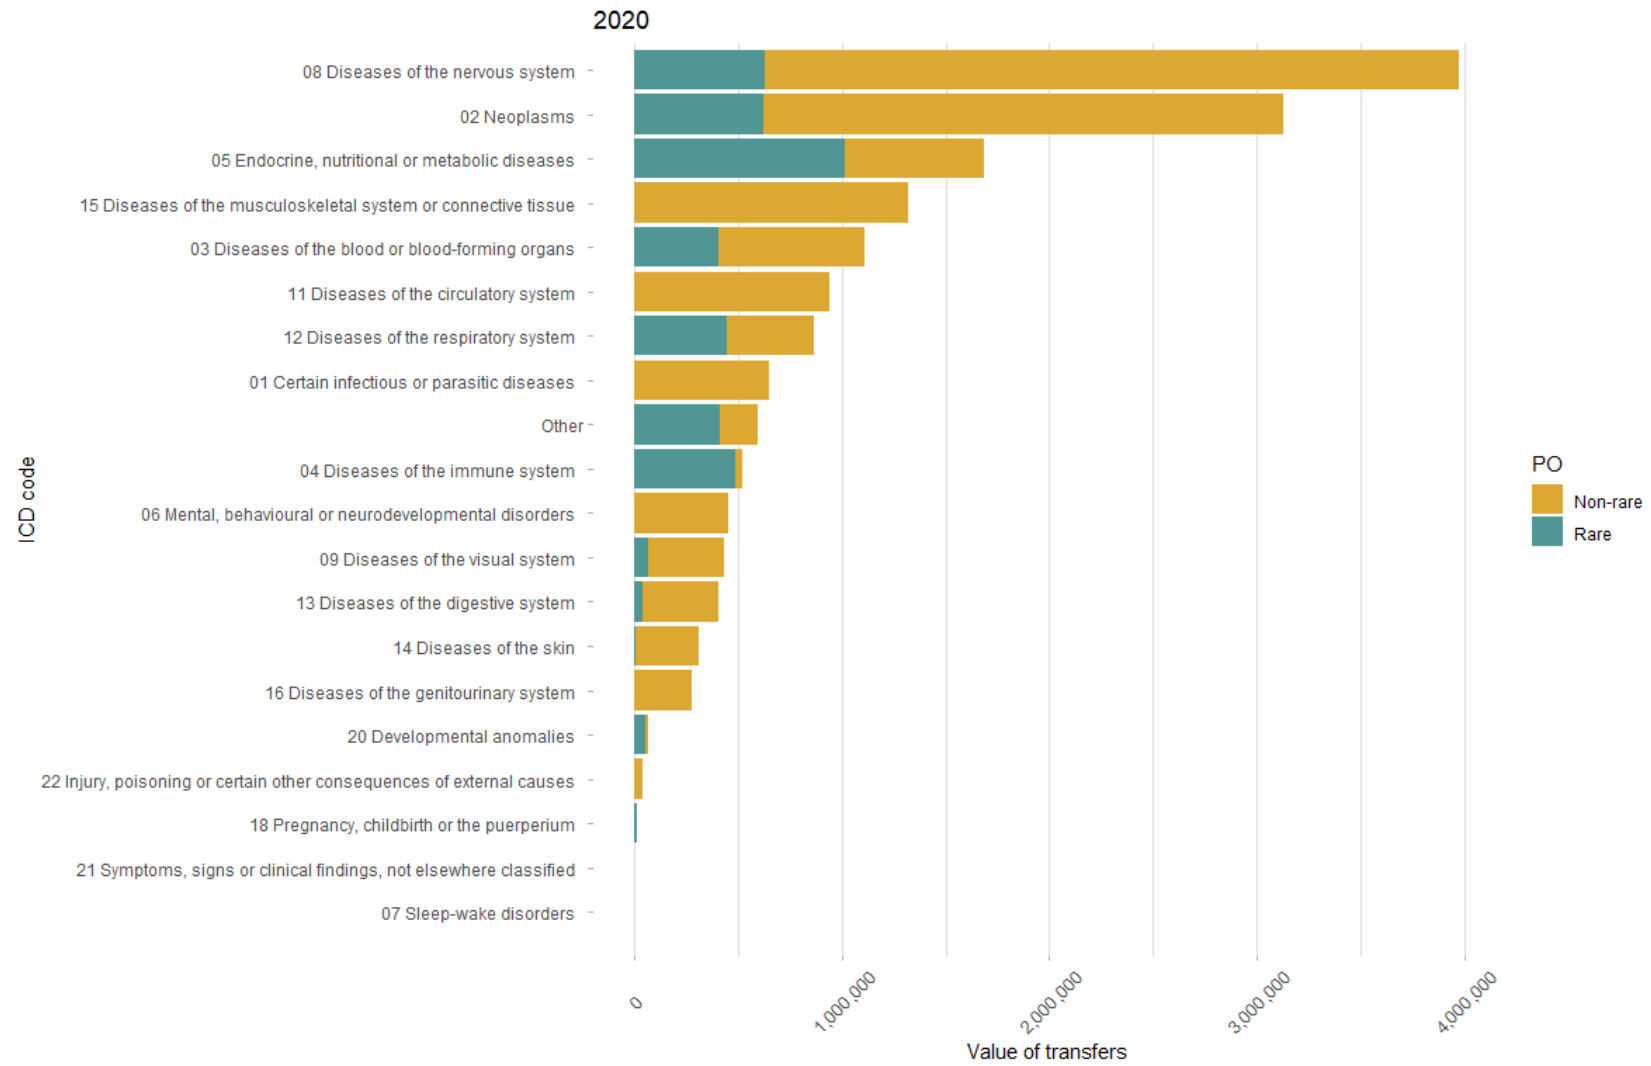



## 1 Sub-group analyses

### 2 Excluded patient organisations

3 181 payments made 53 to patient organisations were excluded from the analysis as they did not  
 4 match EFPIA's definition of "*not-for-profit organisations, mainly composed of patients and/or*  
 5 *caregivers, that represent and/or support the needs of patients and/or caregivers*".

6 Figure 4 illustrates the reasons for patient organisations exclusion. Most of the excluded patient  
 7 organisations were not UK-based (56%; n=101), followed by for profit organisations (36%;  
 8 n=66) and organisations for which no information could be found online (8%; n=14).

9 Non-UK patient organisations mostly comprised international alliances of patient  
 10 organisations, European or Irish organisations. We classified organisations as for-profit if they  
 11 appeared in the UK government repository of companies<sup>1</sup> as *private limited companies*. Care  
 12 homes, consultancies and rehabilitation clinics were the most prominent in this category.

13 Overall, payments to excluded patient organisations amounted to £2,279,445, about 5% of the  
 14 included payments (Figure 5).

15 **Figure 4. Excluded patient organisations by reason of exclusion**

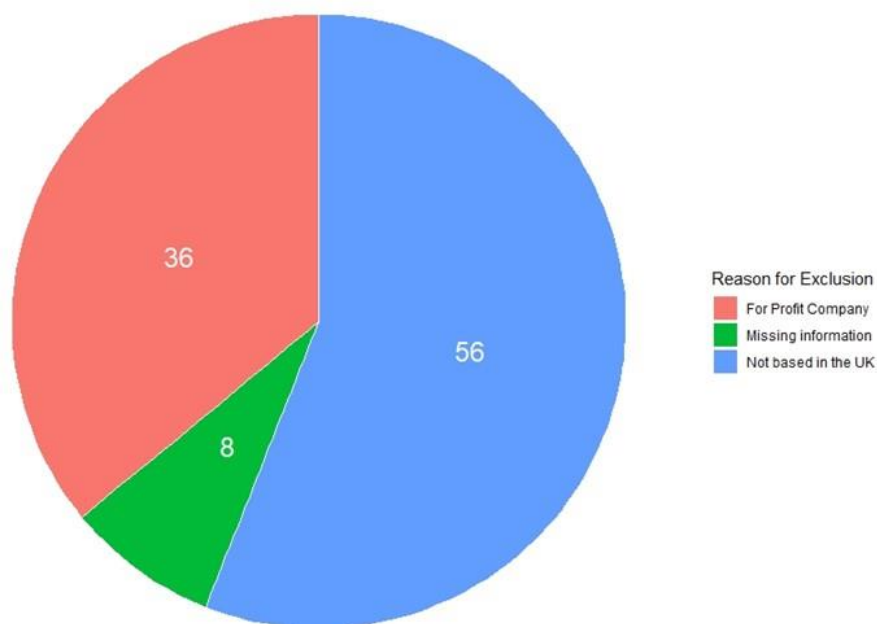

16

<sup>1</sup> <https://find-and-update.company-information.service.gov.uk/>

1 **Figure 5. Payments to included and excluded patient organisations**

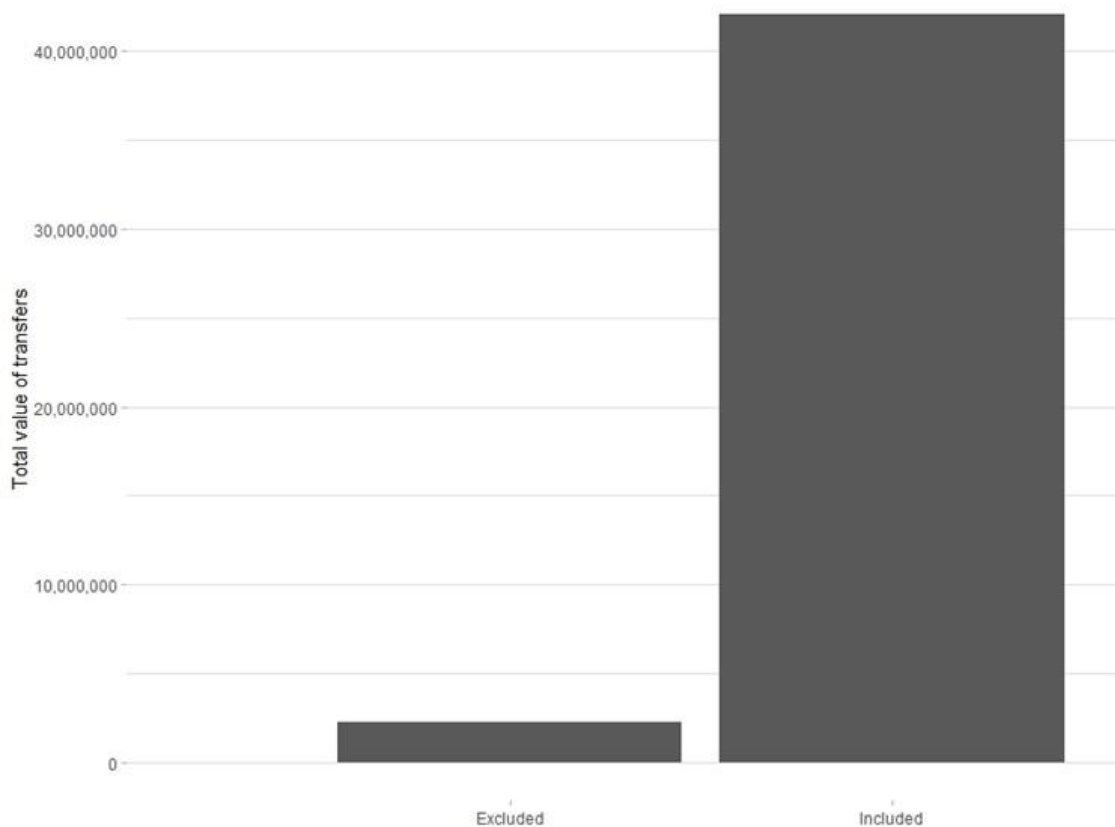

2

3

#### 4 **Non-disease-specific organisations**

5 Overall, 378 payments were made to non-disease-specific organisations. Of those, 181 were  
6 excluded due to the recipient organisation not meeting the necessary condition to be classified  
7 as a patient organisation (as per the analysis presented above). 197 payments were made to 63  
8 non-disease-specific patient organisations. These included hospital charities, carers  
9 organisations and hospices.

10 Payments to non-disease-specific organisations amounted to £ 2,534,044, about 6% of the  
11 included disease-specific payments (Figure 6).

1  
2  
3  
4  
5  
6  
7  
8  
9  
10  
11  
12  
13  
14  
15  
16  
17  
18  
19  
20  
21  
22  
23  
24  
25  
26  
27  
28  
29  
30  
31  
32  
33  
34  
35  
36  
37  
38  
39  
40  
41  
42  
43  
44  
45  
46  
47  
48  
49  
50  
51  
52  
53  
54  
55  
56  
57  
58  
59  
60

1 **Figure 6. Payments to disease and non-disease-specific patient organisations**

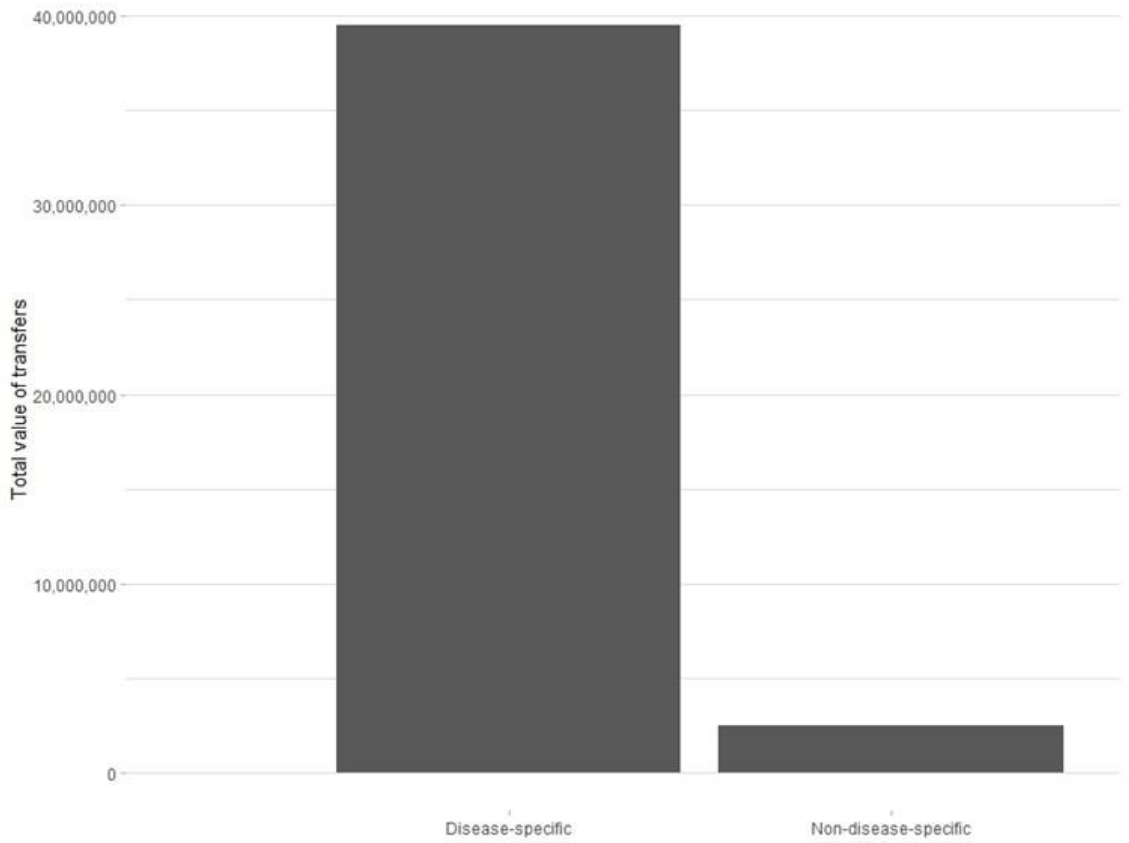

2  
3

Review only

## References

1. Disclosure UK. ABPI Patient Organisations database 2021 [Available from: <https://search.disclosureuk.org.uk/>].
2. PMCPA. ABPI Code of Practice 2021 [Available from: <https://www.pmcpa.org.uk/the-code/2021-interactive-abpi-code-of-practice/>].
3. ONS. Consumer price inflation time series: Office for National Statistics; 2022 [Available from: <https://www.ons.gov.uk/economy/inflationandpriceindices/timeseries/155o/mm23>].
4. HMRC. HMRC yearly average and spot rates: HM Revenue and Customs; [Available from: <https://www.gov.uk/government/publications/exchange-rates-for-customs-and-vat-yearly>].
5. HMRC. HMRC yearly average and spot rates: HM Revenue and Customs; 2022 [Available from: <https://www.gov.uk/government/publications/exchange-rates-for-customs-and-vat-yearly>].
6. NIH U.S. National Library of Medicine. ClinicalTrials.gov [Available from: <https://clinicaltrials.gov/2022>].
7. EFPIA. EFPIA Code of Practice on the Relationships between the Pharmaceutical Industry and Patient Organisations: European Federation of Pharmaceutical Industries and Associations, 2011.
8. Ozieranski P, Rickard E, Mulinari, Shai. Exposing drug industry funding of UK patient organisations. *BMJ* 2019;365:l1806. doi: 10.1136/bmj.l1806
9. Orphanet. The portal for rare diseases and orphan drugs 2022 [Available from: [https://www.orpha.net/consor/cgi-bin/Disease\\_Search\\_Simple.php?lng=EN](https://www.orpha.net/consor/cgi-bin/Disease_Search_Simple.php?lng=EN)].
10. Mulinari S, Vilhelmsson A, Rickard E, et al. Five years of pharmaceutical industry funding of patient organisations in Sweden: Cross-sectional study of companies, patient organisations and drugs. *PLoS One* 2020;15(6):e0235021. doi: 10.1371/journal.pone.0235021 [published Online First: 20200624]
11. NICE. Policy on declaring and managing interests for NICE advisory committees, 2018.
12. WHO. ICD-11 for Mortality and Morbidity Statistics 2022 [Available from: <https://icd.who.int/browse11/1-m/en#/http://id.who.int/icd/entity/465177735?view=G0>].

## CHEERS 2022 Checklist

| Topic                                                   | No. | Item                                                                                                                            | Location where item is reported |
|---------------------------------------------------------|-----|---------------------------------------------------------------------------------------------------------------------------------|---------------------------------|
| <b>Title</b>                                            |     |                                                                                                                                 |                                 |
|                                                         | 1   | Identify the study as an economic evaluation and specify the interventions being compared.                                      | p. 1, lines 1-3                 |
| <b>Abstract</b>                                         |     |                                                                                                                                 |                                 |
|                                                         | 2   | Provide a structured summary that highlights context, key methods, results, and alternative analyses.                           | p. 2, lines 4-33                |
| <b>Introduction</b>                                     |     |                                                                                                                                 |                                 |
| <b>Background and objectives</b>                        | 3   | Give the context for the study, the study question, and its practical relevance for decision making in policy or practice.      | p. 4, 5, 6 (all lines)          |
| <b>Methods</b>                                          |     |                                                                                                                                 |                                 |
| <b>Health economic analysis plan</b>                    | 4   | Indicate whether a health economic analysis plan was developed and where available.                                             | N/A                             |
| <b>Study population</b>                                 | 5   | Describe characteristics of the study population (such as age range, demographics, socioeconomic, or clinical characteristics). | p. 7, lines 3-5                 |
| <b>Setting and location</b>                             | 6   | Provide relevant contextual information that may influence findings.                                                            | p. 7, line 4                    |
| <b>Comparators</b>                                      | 7   | Describe the interventions or strategies being compared and why chosen.                                                         | N/A                             |
| <b>Perspective</b>                                      | 8   | State the perspective(s) adopted by the study and why chosen.                                                                   | p. 7, line 4                    |
| <b>Time horizon</b>                                     | 9   | State the time horizon for the study and why appropriate.                                                                       | p. 7, line 5                    |
| <b>Discount rate</b>                                    | 10  | Report the discount rate(s) and reason chosen.                                                                                  | N/A                             |
| <b>Selection of outcomes</b>                            | 11  | Describe what outcomes were used as the measure(s) of benefit(s) and harm(s).                                                   | p. 7, 8, 9 (all lines)          |
| <b>Measurement of outcomes</b>                          | 12  | Describe how outcomes used to capture benefit(s) and harm(s) were measured.                                                     | p. 7, 8, 9 (all lines)          |
| <b>Valuation of outcomes</b>                            | 13  | Describe the population and methods used to measure and value outcomes.                                                         | p. 8, lines 37-40               |
| <b>Measurement and valuation of resources and costs</b> | 14  | Describe how costs were valued.                                                                                                 | N/A                             |
| <b>Currency, price date, and conversion</b>             | 15  | Report the dates of the estimated resource quantities and unit costs, plus the currency and year of conversion.                 | p. 7, lines 20-25               |

| Topic                                                                        | No. | Item                                                                                                                                                                          | Location where item is reported |
|------------------------------------------------------------------------------|-----|-------------------------------------------------------------------------------------------------------------------------------------------------------------------------------|---------------------------------|
| <b>Rationale and description of model</b>                                    | 16  | If modelling is used, describe in detail and why used. Report if the model is publicly available and where it can be accessed.                                                | p. 8, lines 22-36               |
| <b>Analytics and assumptions</b>                                             | 17  | Describe any methods for analysing or statistically transforming data, any extrapolation methods, and approaches for validating any model used.                               | p. 7, lines 15-17               |
| <b>Characterising heterogeneity</b>                                          | 18  | Describe any methods used for estimating how the results of the study vary for subgroups.                                                                                     | N/A                             |
| <b>Characterising distributional effects</b>                                 | 19  | Describe how impacts are distributed across different individuals or adjustments made to reflect priority populations.                                                        | N/A                             |
| <b>Characterising uncertainty</b>                                            | 20  | Describe methods to characterise any sources of uncertainty in the analysis.                                                                                                  | N/A                             |
| <b>Approach to engagement with patients and others affected by the study</b> | 21  | Describe any approaches to engage patients or service recipients, the general public, communities, or stakeholders (such as clinicians or payers) in the design of the study. | p. 9, lines 17-20               |
| <b>Results</b>                                                               |     |                                                                                                                                                                               |                                 |
| <b>Study parameters</b>                                                      | 22  | Report all analytic inputs (such as values, ranges, references) including uncertainty or distributional assumptions.                                                          | N/A                             |
| <b>Summary of main results</b>                                               | 23  | Report the mean values for the main categories of costs and outcomes of interest and summarise them in the most appropriate overall measure.                                  | p. 10, 13, 14 (all lines)       |
| <b>Effect of uncertainty</b>                                                 | 24  | Describe how uncertainty about analytic judgments, inputs, or projections affect findings. Report the effect of choice of discount rate and time horizon, if applicable.      | N/A                             |
| <b>Effect of engagement with patients and others affected by the study</b>   | 25  | Report on any difference patient/service recipient, general public, community, or stakeholder involvement made to the approach or findings of the study                       | p. 9, lines 17-20               |
| <b>Discussion</b>                                                            |     |                                                                                                                                                                               |                                 |
| <b>Study findings, limitations, generalisability, and current knowledge</b>  | 26  | Report key findings, limitations, ethical or equity considerations not captured, and how these could affect patients, policy, or practice.                                    | p. 15-17 (all lines)            |
| <b>Other relevant information</b>                                            |     |                                                                                                                                                                               |                                 |
| <b>Source of funding</b>                                                     | 27  | Describe how the study was funded and any role of the funder in the identification, design, conduct, and reporting of the analysis                                            | p. 18, lines 11-15              |
| <b>Conflicts of interest</b>                                                 | 28  | Report authors conflicts of interest according to journal or International Committee of Medical Journal Editors requirements.                                                 | p. 18, lines 16-20              |

1  
2  
3  
4  
5  
6  
7  
8  
9  
10  
11  
12  
13  
14  
15  
16  
17  
18  
19  
20  
21  
22  
23  
24  
25  
26  
27  
28  
29  
30  
31  
32  
33  
34  
35  
36  
37  
38  
39  
40  
41  
42  
43  
44  
45  
46  
47  
48  
49  
50  
51  
52  
53  
54  
55  
56  
57  
58  
59  
60

*From:* Husereau D, Drummond M, Augustovski F, et al. Consolidated Health Economic Evaluation Reporting Standards 2022 (CHEERS 2022) Explanation and Elaboration: A Report of the ISPOR CHEERS II Good Practices Task Force. Value Health 2022;25.  
[doi:10.1016/j.jval.2021.10.008](https://doi.org/10.1016/j.jval.2021.10.008)

For peer review only

# BMJ Open

## Industry funding of patient organisations in the United Kingdom: A retrospective study of commercial determinants, funding concentration and disease prevalence

|                                 |                                                                                                                                                                                                            |
|---------------------------------|------------------------------------------------------------------------------------------------------------------------------------------------------------------------------------------------------------|
| Journal:                        | <i>BMJ Open</i>                                                                                                                                                                                            |
| Manuscript ID                   | bmjopen-2022-071138.R2                                                                                                                                                                                     |
| Article Type:                   | Original research                                                                                                                                                                                          |
| Date Submitted by the Author:   | 09-May-2023                                                                                                                                                                                                |
| Complete List of Authors:       | Gentilini, Arianna; The London School of Economics and Political Science, Department of Health Policy<br>Parvanova, Iva; The London School of Economics and Political Science, Department of Health Policy |
| <b>Primary Subject Heading</b>: | Health policy                                                                                                                                                                                              |
| Secondary Subject Heading:      | Health policy                                                                                                                                                                                              |
| Keywords:                       | Health policy < HEALTH SERVICES ADMINISTRATION & MANAGEMENT, PUBLIC HEALTH, Health Equity                                                                                                                  |
|                                 |                                                                                                                                                                                                            |

SCHOLARONE™  
Manuscripts



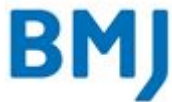

I, the Submitting Author has the right to grant and does grant on behalf of all authors of the Work (as defined in the below author licence), an exclusive licence and/or a non-exclusive licence for contributions from authors who are: i) UK Crown employees; ii) where BMJ has agreed a CC-BY licence shall apply, and/or iii) in accordance with the terms applicable for US Federal Government officers or employees acting as part of their official duties; on a worldwide, perpetual, irrevocable, royalty-free basis to BMJ Publishing Group Ltd ("BMJ") its licensees and where the relevant Journal is co-owned by BMJ to the co-owners of the Journal, to publish the Work in this journal and any other BMJ products and to exploit all rights, as set out in our [licence](#).

The Submitting Author accepts and understands that any supply made under these terms is made by BMJ to the Submitting Author unless you are acting as an employee on behalf of your employer or a postgraduate student of an affiliated institution which is paying any applicable article publishing charge ("APC") for Open Access articles. Where the Submitting Author wishes to make the Work available on an Open Access basis (and intends to pay the relevant APC), the terms of reuse of such Open Access shall be governed by a Creative Commons licence – details of these licences and which [Creative Commons](#) licence will apply to this Work are set out in our licence referred to above.

Other than as permitted in any relevant BMJ Author's Self Archiving Policies, I confirm this Work has not been accepted for publication elsewhere, is not being considered for publication elsewhere and does not duplicate material already published. I confirm all authors consent to publication of this Work and authorise the granting of this licence.

1  
2  
3  
4 1 **Industry funding of patient organisations in the United Kingdom: A**  
5 2 **retrospective study of commercial determinants, funding concentration and**  
6 3 **disease prevalence**  
7  
8  
9

10 4  
11 5 Arianna Gentilini and Iva Parvanova

12 6 Department of Health Policy, London School of Economics and Political Science, London,  
13 7 UK  
14  
15  
16  
17 8  
18  
19 9

20  
21 10 **Corresponding author**  
22

23 11 Arianna Gentilini

24  
25 12 Department of Health Policy  
26 13 Cowdray House, COW.4.09  
27 14 London School of Economics  
28 15 Houghton street  
29 16 London WC2A 2AE  
30 17 England  
31 18 Email: [a.gentilini@lse.ac.uk](mailto:a.gentilini@lse.ac.uk)  
32  
33  
34  
35  
36  
37  
38  
39  
40  
41  
42  
43  
44  
45  
46  
47  
48  
49  
50  
51  
52  
53  
54  
55  
56  
57  
58  
59  
60

1  
2  
3 1 **Abstract**  
4

5 2 **Objectives** – To assess the relationship between UK-based patient organisation funding and  
6 3 companies' commercial interests in rare and non-rare diseases in 2020.

7 4 **Design** – Retrospective analysis of the value and volume of payments from pharmaceutical  
8 5 companies to patient organisations in the UK matched with data on the conditions supported  
9 6 by patient organisations and drugs in companies' approved portfolios and research and  
10 7 development pipelines.

11 8 **Setting** – UK.

12 9 **Participants** – 74 pharmaceutical companies making payments to 341 UK-based patient  
13 10 organisations.

14 11 **Main outcome measures** – Alignment between the commercial interests of pharmaceutical  
15 12 companies and the disease area focus of patient organisations; difference in the volume and  
16 13 value of payments to patient organisations broken down by prevalence of conditions; industry  
17 14 funding concentration, measured as the number of companies funding each patient  
18 15 organisations, the share of overall industry funding coming from each contributing company  
19 16 and the share of industry funding of each organisation comprised by the single highest  
20 17 payments.

21 18 **Results** – 1,422 payments were made by 74 companies to 341 patient organisations. Almost  
22 19 all funds (90%) from pharmaceutical companies were directed to patient organisations that are  
23 20 aligned with companies' approved drug portfolios and research and development pipelines.  
24 21 Despite rare diseases affecting less than 5% of the UK population, more than 20% of all  
25 22 payments were directed to patient organisations which target such conditions. Patient  
26 23 organisations focusing on rare diseases relied on payments from fewer companies (*p-value* =  
27 24 0.0031) compared to organisations focusing on non-rare diseases.

28 25 **Conclusions** – Companies predominantly funded patient organisations operating in therapeutic  
29 26 areas relevant to companies' portfolio or drug development pipeline. Patient organisations  
30 27 focusing on rare diseases received more funding relative to the number of patients affected by  
31 28 these conditions and relied more heavily on payments from fewer companies compared to  
32 29 organisations targeting non-rare diseases. Increased independence of patient organisations  
33 30 could help avoiding conflicts of interest.

34 31

35 32

1  
2  
3  
4  
5  
6  
7  
8  
9  
10  
11  
12  
13  
14  
15  
16  
17  
18  
19  
20  
21  
22  
23  
24  
25  
26  
27  
28  
29  
30  
31  
32  
33  
34  
35  
36  
37  
38  
39  
40  
41  
42  
43  
44  
45  
46  
47  
48  
49  
50  
51  
52  
53  
54  
55  
56  
57  
58  
59  
60

## 1 Strengths and limitations of this study

- 2 • We develop a methodology to determine the concordance between commercial interests  
3 of pharmaceutical companies and disease areas supported by patient organisations.
- 4 • We present a comparative analysis of industry funding to patient organisations  
5 depending on the prevalence of the disease(s) they support.
- 6 • Our analysis focuses on a recent time period which might differ from historical trends.  
7

For peer review only

## 1 Introduction

2 Patient organisations – not-for-profit organisations mainly composed of patients and/or  
3 caregivers that represent and support the needs of patients or caregivers<sup>1 2</sup> – play an important  
4 role in the development, regulatory review, and adoption of new drugs.

5 During research and development, patient organisations effectively advocate for resources to  
6 be directed to conditions where unmet need is highest.<sup>3 4</sup> Patient organisations support research  
7 design and planning, helping to identify patient-relevant study endpoints.<sup>4</sup> Patient organisations  
8 also represent patient views and preferences at the time of regulatory review and health  
9 technology assessment of new drugs.<sup>5 6</sup> For example, during technology appraisals conducted  
10 by the National Institute for Health and Care Excellence (NICE), which makes funding  
11 recommendations for the English National Health Service (NHS), patients, and organisations  
12 representing the interests of patients, provide testimonies of their first-hand experiences on how  
13 the disease affects them and those around them.<sup>7</sup> Finally, when drugs are launched, patient  
14 organisations contribute to dissemination of research results to patient community and  
15 clinicians, and offer support and information on therapies available.<sup>4 8</sup>

16 Given the increasingly important role of patient organisations it is vital to understand their  
17 financial ties with pharmaceutical companies. Previous studies documented the large number  
18 and high value of payments from pharmaceutical companies to patient organisations,<sup>2 8-10</sup> the  
19 uneven distribution between and within therapeutic areas,<sup>2 10</sup> and the concentration of payments  
20 coming from a small number of pharmaceutical firms across multiple jurisdictions.<sup>2 8-16</sup>

21 What remains unknown is the alignment between the commercial interests of pharmaceutical  
22 companies and UK patient organisations' activities. Prior research has demonstrated that  
23 industry tends to prioritize commercially attractive conditions, and there is evidence to suggest  
24 that the marketing of a drug for a particular disease is associated with increased industry  
25 funding to patient organisations operating in that area.<sup>2 10</sup> However, such studies have typically  
26 been conducted in different geographic settings and have focused solely on marketed drugs,  
27 rather than examining the entire research and development pipeline of pharmaceutical  
28 companies. This is especially important given the lengthy timeline for drugs to reach the  
29 market,<sup>17</sup> as failure to consider drugs currently undergoing clinical trials may result in an  
30 incomplete picture.

31 Another gap in the literature relates to the dynamics between the pharmaceutical industry and  
32 patient organisations supporting rare vs. non-rare conditions. In the UK, diseases are defined  
33 rare if they affect up to 5 people in 10,000.<sup>18 19</sup> The low prevalence of rare diseases and their  
34 different aetiology, coupled with the lack of interest from policymakers and manufacturers,  
35 who often prioritise more profitable and prevalent diseases, has necessitated the formation of  
36 patient organisations to advocate for the needs of rare disease patients.<sup>20 21</sup> The National  
37 Organisation for Rare Disorders (NORD), serves as the umbrella organisation for rare disease  
38 patients in the United States (US) and has been instrumental in lobbying for scientific support  
39 and economic incentives to stimulate innovation in rare diseases.<sup>22</sup> This advocacy ultimately  
40 led to the passing of the Orphan Drug Act in 1983 in the USA and the EU Regulation on Orphan  
41 Medicinal Products in Europe in 2000.<sup>18 23</sup>

1  
2  
3 1 Moreover, the limited availability and complexity of medical knowledge regarding rare  
4 2 diseases have also fostered patients and families affected by these conditions to come together  
5 3 to provide each other with support and medical expertise.<sup>20 24</sup> Patient organisations, which are  
6 4 primarily composed of patients and their caregivers, are in a unique position to share first-hand  
7 5 experiences that can inform research and regulatory decisions.<sup>25</sup> While this is true also for non-  
8 6 rare conditions, patient organisations' input in regulatory and health technology appraisals is  
9 7 particularly important in the context of rare diseases due to scarce evidence. For example, the  
10 8 Scottish Medicines Consortium (SMC) provides opportunities for patient groups and clinicians  
11 9 to have a stronger voice in the decision-making process for drugs used to treat rare and end-of-  
12 10 life conditions.<sup>26</sup> Similarly, three members of patient organisations sit in the Committee for  
13 11 Orphan Medicinal Products (COMP) within the European Medicines Agency (EMA), the body  
14 12 responsible for granting orphan designations to drugs. Patient organisation-led registries that  
15 13 collect real-world data on disease progression can de-risk drug development for rare diseases.<sup>20</sup>  
16 14 While observational studies are common in non-rare diseases, they usually do not require the  
17 15 support of patient organisations' networks as patients are easier to identify and recruit.<sup>3</sup>

18 16 Finally, there has been limited exploration of the concentration of industry funding for patient  
19 17 organisations. A recent study by Mulinari and colleagues (2022) examined the average number  
20 18 of pharmaceutical companies making payments to Danish patient organisations,<sup>15</sup> while only  
21 19 one study has investigated the share of industry funding and the top drug company donor's  
22 20 share in UK patient organisations' income.<sup>11</sup> However, no study has specifically focused on the  
23 21 number of companies funding UK patient organisations, nor have they explored whether  
24 22 organisations' industry funding differs based on disease rarity.

25 23 Our paper aims to contribute to and expand on existing literature by examining the concordance  
26 24 between the commercial interests of pharmaceutical companies and patient organisations'  
27 25 activities in the UK. Using publicly available data on 2020 payments, we analysed the volume,  
28 26 value of payments to patient organisations according to their disease area of interest, with the  
29 27 objective of examining whether there are differences in funding patterns between rare and non-  
30 28 rare diseases. Lastly, we examined the concentration of industry funding, namely how many  
31 29 companies funded each patient organisation and the extent to which organisations might have  
32 30 been reliant on funding from a single company. Based on the reviewed literature, we formulated  
33 31 the following hypotheses:

- 34 32 - *Hypothesis 1:* Regarding the concordance between the commercial interests of  
35 33 pharmaceutical companies and patient organisations' activities, we expect no difference  
36 34 between rare and non-rare patient organisations, under the assumption that companies  
37 35 are unlikely to fund organisations out of altruistic motives;
- 38 36 - *Hypothesis 2:* Furthermore, we hypothesise that patient organisations targeting rare  
39 37 diseases would receive less overall funding due to their low prevalence. However, the  
40 38 existing incentives, high costs and consequent profitability of some orphan-designated  
41 39 drugs might affect the proportion of funding directed towards these organisations.<sup>27 28</sup>
- 42 40 - *Hypothesis 3:* Considering the limited availability of drugs for rare diseases from a  
43 41 handful of manufacturers, we expect organisations focusing on these conditions to rely

1  
2  
3  
4  
5  
6  
7  
8  
9  
10  
11  
12  
13  
14  
15  
16  
17  
18  
19  
20  
21  
22  
23  
24  
25  
26  
27  
28  
29  
30  
31  
32  
33  
34  
35  
36  
37  
38  
39  
40  
41  
42  
43  
44  
45  
46  
47  
48  
49  
50  
51  
52  
53  
54  
55  
56  
57  
58  
59  
60

1 on payments of higher value and from fewer companies compared to those targeting  
2 more prevalent conditions.

For peer review only

## 1 **Methods**

### 2 **Data on industry payments**

3 Disclosure reports on pharmaceutical companies' websites were our primary data source on  
4 payments from the pharmaceutical industry to UK patient organisations in 2020.<sup>29</sup> Disclosing  
5 payments to patient organisations is a requirement of Clause 29 of the Association of British  
6 Pharmaceutical Industry (ABPI) Code of Practice.<sup>30</sup> Specifically, the ABPI requires companies  
7 to keep a public record of any payment made to patient organisations on their website for a  
8 minimum of three years following the payment.<sup>30</sup> Companies that sign up to abide by the ABPI  
9 Code accept the jurisdiction of the Prescription Medicines Code of Practice Authority  
10 (PMCPA, code regulator), which also affects non-ABPI members operating in the UK.<sup>30</sup>  
11 Companies may be sanctioned by the PMCPA if they do not disclose their payments.<sup>30</sup> In an  
12 effort to increase transparency, Disclosure UK, an industry-led platform showing payments  
13 from pharmaceutical companies to healthcare professionals and organisations, launched a  
14 gateway in 2020 that collects hyperlinks to companies' disclosures of payments to patient  
15 organisations.<sup>31</sup>

16 First, we screened the websites of all pharmaceutical companies abiding by the ABPI Code,  
17 aided by the Disclosure UK patient organisations gateway. We retrieved payments information  
18 from the companies' websites to ensure that all payments were captured. Second, in light of a  
19 recent study unveiling that payments to patient organisations were misreported in the  
20 Disclosure UK database of payments to healthcare organisations (HCOs),<sup>16</sup> we screened the  
21 2020 Disclosure UK HCOs database for payments to patient organisations.

22 If payments were not disclosed in the company's website nor in the Disclosure UK HCOs  
23 database, we assumed that the company did not make any payments to patient organisations in  
24 2020, as commonly assumed in the literature.<sup>2</sup>

25 One investigator (AG) extracted payment disclosures from the companies' websites. These  
26 comprised the name of the patient organisation, the year when the payment was made, the  
27 reason for the payment and its value in the currency reported by the disclosing company. The  
28 2020 Disclosure UK HCOs database was also screened, and recipients were matched to  
29 standardised patient organisations names. To ensure the data's accuracy, the final database was  
30 scanned for duplicates, but no such instances were found. All payments were first adjusted for  
31 inflation using the ONS Consumer Price Index.<sup>32</sup> When reported in different currencies, such  
32 as United States Dollars (USD), Swiss Franc (CHF), Swedish Krona (SEK), Norwegian Krone  
33 (NKK) and Danish Krone (DKK), the value of the payment was converted to Great British  
34 Pounds (GBP), using the ONS historical yearly conversion rates.<sup>33 34</sup> Two in-kind payments  
35 with a monetary value of zero were excluded from the analysis. Further details on variables'  
36 cleaning and coding can be found in the Supplemental Material.

### 37 **Data on patient organisations**

38 We retrieved data on patient organisations from their websites. Details on the therapeutic area  
39 they advocated for – proxied by International Classification of Diseases Version 11 (ICD-11)



1 codes – and whether the condition(s) was rare or non-rare were also extracted. Conditions were  
2 considered rare if they appeared in the Orphanet database of rare diseases,<sup>35</sup> which is platform  
3 and repository of data on rare diseases and orphan drugs. Patient organisations that did not  
4 match the European Federation of Pharmaceutical Industries and Associations (EFPIA)  
5 definition of what constitutes a patient organisation were excluded from the analysis. We chose  
6 the EFPIA's definition for the following reasons. First, this corresponds the definition used in  
7 the wider peer-reviewed literature.<sup>2 36</sup> Second, other commonly used definitions, such as the  
8 one from the EMA, refer to the structure of patient organisations' governing bodies, which  
9 have to consist of over 50% patients.<sup>37</sup> Considering the high number of patient organisations  
10 included in our analysis, this requirement was challenging – if not impossible – to verify.  
11 Second, EFPIA's definition indicates what the pharmaceutical industry considers to be a patient  
12 organisation. Therefore, it helped us minimize selection bias issues as it includes a wide range  
13 of organisations. We excluded 66 payments to patient organisations that did not match EFPIA's  
14 definition. Sub-group analyses on excluded organisations can be found in the Supplemental  
15 Material.

### 16 **Determining commercial interests**

17 We assessed whether – and the extent to which – a pharmaceutical company holds an interest  
18 in the disease supported by a patient organisation. We adapted the definition of 'interest'  
19 provided by NICE<sup>38</sup>. An interest is when there is, or could be perceived to be, an opportunity  
20 for a pharmaceutical company to benefit in the disease area where the patient organisation  
21 operates. This could include cases where the pharmaceutical company has a drug developed or  
22 in development for a condition targeted by the patient organisation, or where a drug in the  
23 company's portfolio or pipeline is restricted to a specific population affected by the disease  
24 supported by the patient organisation. We define portfolio as a group of drugs that a  
25 pharmaceutical company has already developed, gained regulatory approval for, and is actively  
26 marketing or selling. Conversely, pipeline refers to the collection of drug candidates being  
27 developed by a pharmaceutical company, at various stages of development, from preclinical  
28 research to clinical trials.

29 To establish whether an interest existed or not, we first classified the conditions targeted by  
30 patient organisations to ICD-11 codes using the online ICD-11 database.<sup>39</sup> ICD-11 codes are  
31 mutually exclusive, exhaustive and are arranged as a single hierarchical tree, from level one  
32 (most general e.g., *neoplasms*) to five (most specific, e.g. *plasma cell myeloma*). This means  
33 that specific diseases are nested within broader classifications. Although some patient  
34 organisations, such as hospital charities, carers organisations, and hospices, could not be  
35 matched to specific ICD-11 codes, they were included in the analysis to provide a  
36 comprehensive overview. As a result, the analysis presented results for both disease-specific  
37 and non-disease-specific organisations.

38 We then searched companies' annual reports, websites and the ClinicalTrials.gov registry to  
39 determine whether each company had an interest in the condition targeted by the patient  
40 organisation receiving the payment. Figure 1 schematically illustrates the approach taken to  
41 understand whether – and the degree to which – a company has an interest in the conditions

1  
2  
3 1 (*definitely yes, probably yes, no*). For example, if *Company X* declares in its annual report  
4 2 having a drug in development for multiple myeloma and made a payment to *Blood Cancer UK*,  
5 3 this would be coded as *probably yes*, as the company has a product in its pipeline or portfolio  
6 4 nested within a broader class of conditions targeted by the patient organisation. Conversely,  
7 5 should *Company X* have made a payment to *Myeloma UK*, this would have been coded as  
8 6 *definitely yes*, as there is perfect alignment between the condition targeted by the patient  
9 7 organisation and by *Company X's* drug. Cases in which a company's interest in a certain  
10 8 condition could not be identified were coded as *no*. However, these instances might be due to  
11 9 limitations in data availability and therefore do not necessarily indicate that there was no  
12 10 company interest. Data on pharmaceutical companies' portfolio and pipeline were retrieved  
13 11 from their latest annual reports, company websites and ClinicalTrials.gov.<sup>40</sup>

12 12 One investigator (AG) initially coded all data, while the other (IP) blindly re-coded a 30%  
13 13 random sample of payments to validate the data collection process and minimise the risk of  
14 14 reporting errors. We followed this process when validating all data sources described above.  
15 15 Any disagreement was discussed until consensus was reached.

### 16 **Analysis of industry funding concentration**

17 17 We assessed the concentration of industry funding received by patient organisations. In a prior  
18 18 study, Ozieranski and colleagues examined funding disparities among healthcare organisations  
19 19 in the UK in 2015, using the Gini coefficient to assess the distribution of funding.<sup>41</sup> However,  
20 20 the authors acknowledged that the data preparation process presented challenges, limiting the  
21 21 analysis to payments from a single year. While this methodology has its advantages, we found  
22 22 that the time-consuming process of reshaping the data outweighed the benefits over using  
23 23 descriptive statistics. In particular, we calculated (1) the number of companies funding each  
24 24 patient organisations, (2) the share of overall industry funding to each patient organisations  
25 25 coming from each contributing company and (3) the share of industry funding of each  
26 26 organisation comprised by the single highest payment.

27 27 The Supplemental Material provides further details on the data collection and how the  
28 28 outcomes were constructed. Descriptive statistics and tests, such as ranges and Mann–Whitney  
29 29 U tests, were presented in the analysis. These statistics were preferred over the mean due to the  
30 30 skewed distribution of the data analysed. All analyses and data visualisations were performed  
31 31 using Stata 17 and RStudio (*ggplot2* package), respectively.

### 32 **Patient and public involvement**

33 33 Patients were not involved in this study as our analyses focused on patient organisations as  
34 34 institutional actors rather than single patients with specific conditions. We plan to disseminate  
35 35 key findings from our analysis to patients and members of the public.

## 1 Results

2 In 2020, 74 companies made 1,422 payments to 341 patient organisations, amounting to £22.6  
3 million. Out of the total of 1,422 payments made by pharmaceutical companies to patient  
4 organisations in 2020, 82% (1,168 payments) with a value of £18 million were accurately  
5 disclosed on the companies' websites. The remaining 18% (254 payments) with a value of £4.6  
6 million were reported in the Disclosure UK HCOs database. Among the companies, 24 out of  
7 74 reported payments only on their websites, while 14 reported payments only in the Disclosure  
8 UK HCOs database, and 36 reported payments in both.

9 Overall, *diseases of the nervous system* (£4.3 million) was the most funded therapeutic area  
10 over time, followed by *neoplasms* (£3.2 million) and *endocrine, nutritional or metabolic*  
11 *diseases* (£3.4 million). The conditions that received more funding in 2020 were multiple  
12 sclerosis (£1.7 million), followed by obesity (£1.4 million) and epilepsy (£1 million). Pfizer,  
13 Novo Nordisk, UCB, Novartis and Roche were the top five funders over the study period  
14 (Figure 2). These companies contributed to more than a third (36%) of all payments.

15 Table 1 summarises the number and value of payments to patient organisations.

### 16 Companies' interest in payments to patient organisations

17 In 2020, 85% of all payments were directed to patient organisations that were judged to be  
18 aligned with their portfolio or pipeline. Only 15% of payments were made to organisations that  
19 focused on conditions that could not be linked to a product in the funder's portfolio or pipeline.  
20 Table 2 shows the volume and value of payments, broken down by the company's interest  
21 variable, overall and whether patient organisations targeted a rare or non-rare disease.  
22 Payments to patient organisations targeting a disease for which the company has a product  
23 developed or in development (*definitely yes*) made up 56% and 54% for patient organisations  
24 targeting rare and non-rare conditions, respectively. However, this difference was not  
25 statistically significant as anticipated in *Hypothesis 1* ( $\chi^2 = 1.049$ ,  $p\text{-value} = 0.592$ ).

26 The monetary value of payments coded as *definitely yes* accounted for 55% of the overall  
27 payment value. However, this was as high as 67% for patient organisations targeting rare  
28 diseases, versus 59% for organisations focusing on non-rare conditions. This difference was  
29 found to be statistically significant ( $\chi^2 = 370.163$ ,  $p\text{-value} = 0.058$ ). When payments coded  
30 as *probably yes* were included, the share increased to 90% and 97% for all patient organisations  
31 and disease-specific organisations only, respectively.

1 **Table 1. Number and value of payments from the pharmaceutical industry to UK patient organisations broken down by year and rarity of diseases**

2 **Payment statistics**

---

|                                              |                           |
|----------------------------------------------|---------------------------|
| 3 <b>Number of payments</b>                  | 1,422                     |
| 4 <b>Median payment (IQR; overall)</b>       | £7,943 (£1,200 - £15,000) |
| 5 <b>Median payment (IQR; rare)</b>          | £8,775 (£2,500 - £15,965) |
| 6 <b>Median payment (IQR; non-rare)</b>      | £9,060 (£1,520 - £16,850) |
| 7 <b>Value of payments (£; overall)</b>      | £22,577,314               |
| 8 <b>Value of payments (£; rare)</b>         | £4,629,779                |
| 9 <b>Value of payments (£; non-rare)</b>     | £15,875,662               |
| 10 <b>Number of pharmaceutical companies</b> | 74                        |
| 11 <b>Number of patient organisations</b>    | 341                       |

---

12 Abbreviations: IQR (Interquartile range).

13 Notes: All payments are expressed in 2020 GBP. The Supplemental Materials detail the inflation multipliers and conversion rates used, both retrieved from the Office of  
 14 National Statistics (ONS) website. Further details on how patient organisation data were cleaned and coded, please see the Supplemental Materials . Please note that the  
 15 number of pharmaceutical companies and patient organisations making and receiving payments across the study period refers to companies and organisations that made or  
 16 received at least one payment, respectively.

17 **Table 2. Volume and value of payments by company interests in 2020**

| 18 <b>PO type</b> | 19 <b>Company's interest</b> | 20 <b>Volume; n (%)</b> | 21 <b>Value: £</b>   |
|-------------------|------------------------------|-------------------------|----------------------|
| 22 Overall†       | 23 Definitely yes            | 24 678 (48%)            | 25 £12,529,514 (56%) |
|                   | 26 Probably yes              | 27 525 (37%)            | 28 £7,700,069 (34%)  |
|                   | 29 No*                       | 30 219 (15%)            | 31 £2,347,732 (10%)  |
| 32 Rare           | 33 Definitely yes            | 34 161 (56%)            | 35 £3,119,217 (67%)  |
|                   | 36 Probably yes              | 37 115 (40%)            | 38 £1,388,545 (30%)  |
|                   | 39 No*                       | 40 10 (4%)              | 41 £122,017 (3%)     |
| 42 Non-rare       | 43 Definitely yes            | 44 517 (54%)            | 45 £9,410,297 (59%)  |
|                   | 46 Probably yes              | 389 (41%)               | £6,056,915 (38%)     |
|                   | No*                          | 46 (5%)                 | £408,449 (3%)        |

1  
2  
3  
4  
5  
6  
7  
8  
9  
10  
11  
12  
13  
14  
15  
16  
17  
18  
19  
20  
21  
22  
23  
24  
25  
26  
27  
28  
29  
30  
31  
32  
33  
34  
35  
36  
37  
38  
39  
40  
41  
42  
43  
44  
45  
46

1 Notes: *Definitely yes* indicates payments directed to patient organisations that operated in a disease area (ICD-11 level 4 or higher) for which the company has a product in its  
 2 portfolio or pipeline. *Probably yes* indicates directed to patient organisations that operated in a disease area (ICD-11 level 3 or lower) for which the company has a product in  
 3 its portfolio or pipeline. *No* refers to directed to patient organisations that operated in a disease area for which no link could be found to the company’s portfolio or pipeline.  
 4 The higher the ICD-11, the more specific the condition. For example, if the ICD-11 level 4 is *Plasma cell neoplasms*, level 2 would be *Neoplasms of hematopoietic or lymphoid*  
 5 *tissues*. Further details on how this variable was constructed can be found in the Supplemental Material.  
 6 \*Please note that the *No* category of interest conservatively includes also interests that were considered as unclear.  
 7 †Please note that the *Overall* results are not a sum of the *Rare* and *Non-rare* results, as they also include patient organisations that could not be classified in either group and  
 8 are non-disease-specific.

For peer review only

### 1 **Industry funding of patient organisations focusing on rare vs. non-rare conditions**

2 Of the £22.6 million in payments from industry to patient organisations, £4.6 million (21%;  
3 n=286) were directed to organisations focusing on rare diseases while £15.9 million (70%;  
4 n=952) to organisations supporting non-rare conditions. The remaining 9% was directed to  
5 non-disease-specific patient organisations, which were excluded from this analysis. Linking  
6 these results to *Hypothesis 2*, we observe that patient organisations supporting rare diseases  
7 received less but still substantial funding.

8 The most funded patient organisation overall in 2020 was the European Association for the  
9 Study of Obesity, receiving almost £1.5 million, followed by Epilepsy Society (£955,600) and  
10 Shift.MS (£588,451). Among the top ten recipients overall in 2020, only one focused on rare  
11 diseases (Cystic Fibrosis Trust). However, it is worth noting that Blood Cancer UK, which  
12 focuses on malignant haematological malignancies including rare cancers, ranked seventh on  
13 the list.<sup>42</sup> The Cystic Fibrosis Trust (£445,229), The Society for Mucopolysaccharide Diseases  
14 (£358,037), and the International Patient Organisation for Primary Immunodeficiencies  
15 (£345,914) were the top three recipients focusing on rare diseases, followed by Myeloma UK  
16 with a slightly lower amount (£340,604).

17 Figure 3 shows therapeutic areas in order from most to least funded, broken down by rarity of  
18 disease targeted. In the case of organisations focusing on rare diseases, *endocrine, nutritional*  
19 *or metabolic disease, neoplasms* and *diseases of the nervous system* received most funds.  
20 Together, the top three most funded disease areas represented about half of overall funding  
21 (57%). When looking at the non-rare conditions that attracted most funding, multiple sclerosis  
22 was first (£1.7 million), followed by diabetes (£1.4 million) and epilepsy (£1 million). Cystic  
23 fibrosis, primary immunodeficiencies, and lysosomal storage diseases, which include rare  
24 metabolic disorders such as Fabry and Gaucher diseases, received the highest funding overall,  
25 attracting £445,229, £363,998 and £358,037, respectively.

### 1 **Industry funding concentration**

2 Each patient organisation received payments from a median of approximately one unique  
3 company, with 1 (IQR:1-2) and 2 (IQR:1-3) companies funding patient organisations targeting  
4 rare and non-rare diseases, respectively. However, this difference was not statistically  
5 significant ( $z = 1.582$ ,  $p\text{-value} = 0.114$ ). Overall, the range of unique companies making  
6 payments to a unique patient organisation spanned from a minimum of 1 to a maximum of 13.  
7 The latter was recorded for Genetic Alliance UK, a national charity and an alliance of over 200  
8 patient organisations, supporting those affected by rare genetic conditions.

9 In our sample, the median yearly payment of a company to a patient organisation comprised  
10 24% of the its overall industry payments (IQR: 9.5%-74%). When looking at patient  
11 organisations focusing on rare diseases, the median company contribution was as high as 30%  
12 (IQR: 11.6%-93%) versus 23% (IQR: 9.4%-65.8%) for non-rare conditions ( $z = -2.164$ ,  $p\text{-value}$   
13  $= 0.031$ ).

14 Finally, the share of industry funding comprised by the single highest payment per organisation  
15 amounted to an average of 67.5% (SD: 0.30) for all years, ranging from a minimum of 8.5% to  
16 a maximum of 100%. The highest value payment in the case of patient organisations targeting  
17 rare diseases made up a larger share of the overall industry funding (median: 71%, IQR: 43.5%-  
18 100%), despite not significant, compared to those focusing on more prevalent conditions  
19 (median: 62.5%, IQR: 34.7%-100%). While there was not a significant difference in the  
20 number of funding companies between patient organisations supporting rare and non-rare  
21 diseases ( $z = -1.087$ ,  $p\text{-value} = 0.277$ ) as stated in *Hypothesis 3*, the former relied on larger  
22 payments. Histograms illustrating the distribution of the statistics explored in this analysis can  
23 be found in the Supplemental Materials.

## Discussion

In this study, we evaluated the financial links between the pharmaceutical industry and patient organisations in the UK in 2020. This is the first study to document the almost-perfect concordance of pharmaceutical company interests and patient organisation funding in the UK. Almost all industry payments during our study period – in terms of both volume (85%) and value (90%) – were to patient organisations aligned with pharmaceutical companies' portfolios and pipelines. This share was even higher when considering only disease-specific patient organisations (97%). Despite rare diseases affecting less than 5% of the UK population, more than 20% of industry funding to patient organisations in 2020 was directed towards organisations focusing on such conditions (£4.6 million / £22.6 million). Finally, we found that patient organisations targeting rare diseases relied on payments from fewer companies but of higher value compared to organisations focusing on non-rare diseases.

The almost-perfect concordance between industry interests and patient organisation activities likely reflect the commercial attractiveness of conditions targeted by pharmaceutical companies.<sup>2 43</sup> Such close alignment between the interests of companies and patient organisations might undermine the credibility of patient organisations as perceived by the general public and might raise questions about patient organisations' inputs in regulatory and health technology appraisals.<sup>9 44 45</sup> Similarly, a study found that during NICE appraisal meetings fewer than 25% of all relevant financial ties between patient organisations and pharmaceutical companies were disclosed.<sup>46</sup> As discussed by the Mandeville and colleagues, this lack of transparency increases the risk of conflicts of interest not being properly detected and managed.

Our findings make an important contribution to the existing body of literature on industry funding of patient organisations. Ozieranski et al found that industry donated over £57 million to UK patient organisations from 2012 to 2016, an average of £11.5 million per year.<sup>2</sup> The authors also observed that payments were concentrated in commercially attractive therapeutic areas, with organisations focusing on cancer receiving more than 36% of overall payments.<sup>2</sup> However, the study did not examine whether companies were more likely to fund organisations that target diseases for which they have already developed or are currently developing products. Another earlier study examined payments to Swedish patient organisations and found an association between drug commercialisation and industry funding.<sup>10</sup> The authors did not take into account products in the companies' pipelines nor drugs that might not yet have been launched in Sweden. Considering that patient organisations have an important role not only in the post-commercialisation phase but also in the R&D and approval stages. We therefore developed a replicable classification model to determine whether payments from companies were directed at organisations that were aligned with their portfolios and pipelines.

Patient organisations focusing on rare diseases can drive both supply of and demand for medicinal products due to their research, advocacy and education role.<sup>4 47</sup> As a result of their close ties with patients, these organisations have the credibility and power to educate patient communities, advocate for access to available therapies and raise awareness on the unmet need of certain conditions.<sup>4 20 48</sup> Although a large share of both the value and number of payments were directed to patient organisations focusing on rare diseases, most funds targeted



1  
2  
3 1 commercially attractive rare conditions, such as multiple myeloma and cystic fibrosis, where  
4 2 the unmet need is relatively low compared to other rare conditions. These are diseases that have  
5 3 relatively high prevalence and for which 10 and 29 treatments, respectively, are currently  
6 4 approved for use in Europe.<sup>35 49</sup> Furthermore, rare diseases have proved a lucrative asset for  
7 5 pharmaceutical companies.<sup>43</sup> The additional market protection granted to orphan-designated  
8 6 product and the often higher willingness to pay from payers has led companies to increasingly  
9 7 focus on these medicines, which can offer a high return on investment.<sup>27 28</sup> This poses the risk  
10 8 of widening already existing health inequities, where severe and debilitating rare conditions  
11 9 that affect a small number of patients do not receive the resources they need and have to rely  
12 10 on limited public grants.<sup>50</sup>

11 11 Finally, our analysis showed that patient organisations focusing on rare diseases are funded by  
12 12 very few companies, relying on a single payment for over 70% of their industry-reported  
13 13 income. Despite the share of industry contributions among the overall patient organisation's  
14 14 income was found to be low in the literature,<sup>11</sup> this increases the risk of pursuing the company's  
15 15 commercial interests rather than objectively representing a patient body.<sup>12</sup> In this study we  
16 16 find that patient organisation received payments from a median of approximately one unique  
17 17 company (IRQ:1-3), ranging from 1 to a maximum of 13. This corresponds to an average of  
18 18 2.6 (SD:2.3) funding companies per patient organisation. This is consistent with findings from  
19 19 a recent study investigating the distribution of payments from industry to Danish patient  
20 20 organisations, which found that on average, most organisations were funded by 2.6 (SD:2.1)  
21 21 on average.<sup>15</sup>

22 22 These findings have important implications for policy and practice. To minimise conflicts of  
23 23 interests and maintain the integrity of patient organisations, particular attention should be paid  
24 24 to funding from companies in the immediate period before or after a patient organisation has  
25 25 endorsed this company's product.<sup>46</sup> One way of avoiding potential conflicts of interest is  
26 26 through increased transparency. Despite considerable progress on this front, especially in terms  
27 27 of reporting the monetary value of industry payments, there are still gaps in reporting.<sup>51</sup>

28 28 As highlighted in this and other studies, several companies misreport their payments to patient  
29 29 organisations.<sup>16</sup> Our study found that only 32% of companies disclose all of their payments  
30 30 correctly (i.e., on their website), while the rest report them on both their websites and the  
31 31 Disclosure UK HCOs database (49%) or solely on the latter (19%). This duplication of  
32 32 reporting efforts makes it harder to achieve transparency and obtain a comprehensive overview  
33 33 of the financial relationships between companies and patient organisations. Therefore, efforts  
34 34 should be made to establish a unique repository for payments to patient organisations, similar  
35 35 to the one currently in place for physicians and healthcare organisations.

36 36 Furthermore, the financial independence of patient organisations is fundamental to ensure that  
37 37 patients' interests are at the forefront of the organisations' agenda.<sup>52</sup> Compromising this  
38 38 independence can have a detrimental effect and distort public health priorities. For example,  
39 39 AbbVie-sponsored patient organisations were found to strongly oppose switching to  
40 40 biosimilars for Humira, the company's blockbuster drug, in various countries.<sup>15</sup> Similarly, a  
41 41 recent investigation uncovered strong financial connections between Novo Nordisk and UK-  
42 42 based patient organisations that supported the approval of the company's latest obesity drug.

1  
2  
3 1 This, alongside other ongoing investigations, culminated in the suspension of the company  
4 2 from ABPI.<sup>53</sup> The strong financial ties between Novo Nordisk and patient organisations,  
5 3 contributing to the NICE appraisal of the company's drug, raises serious concerns about these  
6 4 groups' independence and might ultimately harm patients. Notably, our analysis found Novo  
7 5 Nordisk to be the second highest funder of patient organisations in term of value in 2020 for  
8 6 an amount of more than £1.8 million. In the long term, policymakers should make sure that  
9 7 patient organisations receive adequate public funding regardless of whether they focus on  
10 8 conditions that are profitable for the industry. Such public funding is particularly important for  
11 9 patient organisations supporting rare diseases, as relatively few companies have financial links  
12 10 with patient organisations focusing on rare diseases, potentially creating high reliance on few  
13 11 high-value payments.

12 This study had limitations. First, the lack of mandatory reporting of payments to patient  
13 12 organisations by companies that do not comply with the ABPI Code is a major limitation of  
14 13 our analysis.<sup>54</sup> For example, our dataset does not include payments by Vertex, a company with  
15 14 a rare-focused portfolio and a strong presence in cystic fibrosis.<sup>55</sup> Even for companies that are  
16 15 signatories of the ABPI Code, underreporting of payments to patient organisations and removal  
17 16 of disclosure reports from the public domain has been observed.<sup>13 56 57</sup> Second, in our  
18 17 assessment of company interests, we made a conservative assumption that only patient  
19 18 organisations which target relatively narrow conditions were eligible to be coded as *definitely*  
20 19 *yes*. Despite this assumption, we concluded that more than half of payments were in therapeutic  
21 20 areas in which companies had a clear interest. Finally, our analysis focused on a recent though  
22 21 limited time period. While previous publications show similar trends in terms of the most  
23 22 funded diseases and absolute value of payments,<sup>2 10</sup> lending credibility to our analysis and  
24 23 underlying data, it is still unclear whether these trends hold over time and their generalisability  
25 24 to other periods.

26 There are several avenues which can be explored further to build on this analysis. While some  
27 26 of the previous literature on the topic has focused on the financial dependency of patient  
28 27 organisations' budgets from pharmaceutical funding,<sup>11</sup> whether this differs depending on the  
29 28 rarity of the disease targeted has not been explored. Due to the small number of patients  
30 29 affected by rare conditions, patient organisations that target such conditions may be less well-  
31 30 equipped to finance their activities via charitable events and may rely more heavily on  
32 31 contributions from pharmaceutical companies. Lastly, while our analysis did not evaluate the  
33 32 effect of Covid-19 on the financial dynamics between pharmaceutical companies and patient  
34 33 organisations, we expect that the pandemic had a substantial effect on the type, value and  
35 34 distribution of payments. Future research should examine the impact of Covid-19 on industry  
36 35 funding of patient organisations.

### 37 **Conclusions**

38 Almost all industry funding of UK patient organisations in 2020 was in areas that were aligned  
39 38 with companies' approved drug portfolios and research and development pipelines.  
40 39 Pharmaceutical companies spent a larger amount on patient organisations focusing on rare  
41 40 diseases and these organisations relied on a small of companies for their funding.

1  
2  
3  
4  
5  
6  
7  
8  
9  
10  
11  
12  
13  
14  
15  
16  
17  
18  
19  
20  
21  
22  
23  
24  
25  
26  
27  
28  
29  
30  
31  
32  
33  
34  
35  
36  
37  
38  
39  
40  
41  
42  
43  
44  
45  
46  
47  
48  
49  
50  
51  
52  
53  
54  
55  
56  
57  
58  
59  
60

1 **Acknowledgements:** We thank Dr Huseyin Naci and Dr Olivier Wouters, both from the  
2 Department of Health Policy at the London School of Economics and Political Science, for  
3 providing comments on earlier drafts of this paper. We also acknowledge Dr Mylene Lagarde  
4 and Dr Panos Kanavos for the support provided when finalising the manuscript.

5 **Contributors:** AG developed a preliminary version of the study and developed it further with  
6 IP. AG collected the data. AG and IP did the analysis, wrote and reviewed the manuscript. Both  
7 authors had full access to all of the data (including statistical reports and tables) in the study  
8 and can take responsibility for the integrity of the data and the accuracy of the data analysis.  
9 The corresponding author attests that all listed authors meet authorship criteria and that no  
10 others meeting the criteria have been omitted. AG is the guarantor.

11 **Funding:** This research received no specific grant from any funding agency in the public,  
12 commercial or not-for-profit sectors. AG is funded by the ESRC for her doctoral research  
13 (Project reference: 2480077) and is employed by Imperial College London. IP is funded by the  
14 ESRC for her doctoral research (Project reference: 2311285) and is employed by Imperial  
15 College London.

16 **Competing interest statement:** No competing interest.

17 **Ethical approval:** This study does not involve human participants and ethical approval was  
18 not required.

19 **Data sharing:** A dataset of all publicly available data used in the study is available from the  
20 corresponding author at a.gentilini@lse.ac.uk.

21 **Transparency declaration:** The lead author affirms that the manuscript is an honest, accurate,  
22 and transparent account of the study being reported; that no important aspects of the study have  
23 been omitted; and that any discrepancies from the study as planned (and, if relevant, registered)  
24 have been explained.

25 The Corresponding Author has the right to grant on behalf of all authors and does grant on  
26 behalf of all authors, an exclusive licence (or non-exclusive for government employees) on a  
27 worldwide basis to the BMJ Publishing Group Ltd to permit this article (if accepted) to be  
28 published in BMJ editions and any other BMJ PGL products and sublicences such use and  
29 exploit all subsidiary rights, as set out in our licence.

## References

1. EFPIA. EFPIA Code of Practice on the Relationships between the Pharmaceutical Industry and Patient Organisations: European Federation of Pharmaceutical Industries and Associations, 2011.
2. Ozieranski P, Rickard E, Mulinari, Shai. Exposing drug industry funding of UK patient organisations. *BMJ* 2019;365:l1806. doi: 10.1136/bmj.l1806
3. Polich GR. Rare disease patient groups as clinical researchers. *Drug Discovery Today* 2012;17(3):167-72. doi: <https://doi.org/10.1016/j.drudis.2011.09.020>
4. Geissler J, Ryll B, di Priolo SL, et al. Improving Patient Involvement in Medicines Research and Development::A Practical Roadmap. *Therapeutic Innovation & Regulatory Science* 2017;51(5):612-19. doi: 10.1177/2168479017706405
5. MHRA. Patient Involvement Strategy 2021-25: Medicines and Healthcare products Regulatory Agency 2020.
6. MHRA. Putting patients first: A new era for our agency. Delivery Plan 2021-2023: Medicines and Healthcare products Regulatory Agency 2020.
7. NICE. Public Involvement Programme - Overview of technology appraisals: A factsheet for patient and carer organisations: National Institute for Health and Care Excellence, 2014
8. Fabbri A, Parker L, Colombo C, et al. Industry funding of patient and health consumer organisations: systematic review with meta-analysis. *BMJ* 2020;368:l6925. doi: 10.1136/bmj.l6925
9. Rose SL, Highland J, Karafa MT, et al. Patient Advocacy Organizations, Industry Funding, and Conflicts of Interest. *JAMA Intern Med* 2017;177(3):344-50. doi: 10.1001/jamainternmed.2016.8443
10. Mulinari S, Vilhelmsson A, Rickard E, et al. Five years of pharmaceutical industry funding of patient organisations in Sweden: Cross-sectional study of companies, patient organisations and drugs. *PLoS One* 2020;15(6):e0235021. doi: 10.1371/journal.pone.0235021 [published Online First: 20200624]
11. Ozieranski P, Pitter JG, Rickard E, et al. A 'patient-industry complex'? Investigating the financial dependency of UK patient organisations on drug company funding. *Sociol Health Illn* 2022;44(1):188-210. doi: 10.1111/1467-9566.13409 [published Online First: 20211207]
12. Rose SL. Patient advocacy organizations: institutional conflicts of interest, trust, and trustworthiness. 2014(1748-720X (Electronic))
13. Lexchin J, Batt S, Goldberg D, et al. National patient groups in Canada and their disclosure of relationships with pharmaceutical companies: a cross-sectional study. *BMJ Open* 2022;12(3):e055287. doi: 10.1136/bmjopen-2021-055287
14. Parker L, Fabbri A, Grundy Q, et al. "Asset exchange"—interactions between patient groups and pharmaceutical industry: Australian qualitative study. *BMJ* 2019;367:l6694. doi: 10.1136/bmj.l6694
15. Mulinari S, Pashley D, Ozieranski P. Advancing international comparison of pharmaceutical industry funding of patient advocacy: Focus on Denmark. *Health Policy* 2022;126(12):1256-62. doi: <https://doi.org/10.1016/j.healthpol.2022.11.003>
16. Rickard E, Carmel E, Ozieranski P. Comparing pharmaceutical company payments in the four UK countries: a cross-sectional and social network analysis. *BMJ Open* 2023;13(3):e061591. doi: 10.1136/bmjopen-2022-061591
17. Wouters OJ, McKee M, Luyten J. Estimated Research and Development Investment Needed to Bring a New Medicine to Market, 2009-2018. 2020(1538-3598 (Electronic))
18. European Commission. Regulation (EC) No 141/2000 of the European Parliament and of the Council of 16 December 1999 on Orphan Medicinal Products, 2000.
19. Department of Health & Social Care. Policy Paper - The UK Rare Diseases Framework 2021 [Available from: <https://www.gov.uk/government/publications/uk-rare-diseases-framework/the-uk-rare-diseases-framework>].
20. Aymé S, Kole A, Groft S. Empowerment of patients: lessons from the rare diseases community. *Lancet* 2008;371(9629):2048-51. doi: 10.1016/s0140-6736(08)60875-2

- 1  
2  
3 1 21. Gamba S, Magazzini L, Pertile P. R&D and market size: Who benefits from orphan drug  
4 2 legislation? *Journal of Health Economics* 2021;80:102522. doi:  
5 3 <https://doi.org/10.1016/j.jhealeco.2021.102522>  
6 4 22. Waxman HA. The Waxman Report : How Congress Really Works: First edition. New York :  
7 5 Twelve, 2009. 2009.  
8 6 23. Office of the Federal Register NAARA. Orphan Drug Act - 6 Stat. 2049. In: Office. USGP, ed.,  
9 7 1983.  
10 8 24. Halley MC. From "Ought" to "Is": Surfacing Values in Patient and Family Advocacy in Rare  
11 9 Diseases. 2021(1536-0075 (Electronic))  
12 10 25. Dunkle M, Pines W, Saltonstall PL. Advocacy Groups and Their Role in Rare Diseases Research.  
13 11 In: Posada de la Paz M, Groft SC, eds. *Rare Diseases Epidemiology*. Dordrecht: Springer  
14 12 Netherlands 2010:515-25.  
15 13 26. Scottish Medicines Consortium. Patient and Clinician Engagement (PACE) process [Available  
16 14 from: <https://www.scottishmedicines.org.uk/how-we-decide/pace/2023>.  
17 15 27. Côté A, Keating B. What Is Wrong with Orphan Drug Policies? *Value in Health* 2012;15(8):1185-  
18 16 91. doi: <https://doi.org/10.1016/j.jval.2012.09.004>  
19 17 28. Igho JO, Elizabeth AS, Matthew JT, et al. Effectiveness, safety and costs of orphan drugs: an  
20 18 evidence-based review. *BMJ Open* 2015;5(6):e007199. doi: 10.1136/bmjopen-2014-007199  
21 19 29. Disclosure UK. ABPI Patient Organisations database 2021 [Available from:  
22 20 <https://search.disclosureuk.org.uk/>.  
23 21 30. PMCPA. ABPI Code of Practice 2021 [Available from: [https://www.pmcpa.org.uk/the-  
24 22 code/2021-interactive-abpi-code-of-practice/](https://www.pmcpa.org.uk/the-code/2021-interactive-abpi-code-of-practice/).  
25 23 31. Disclosure UK. ABPI Patient Organisations database 2021 [Available from:  
26 24 <https://search.disclosureuk.org.uk/2020>.  
27 25 32. ONS. Consumer price inflation time series: Office for National Statistics; 2022 [Available from:  
28 26 <https://www.ons.gov.uk/economy/inflationandpriceindices/timeseries/155o/mm23>.  
29 27 33. HMRC. HMRC yearly average and spot rates: HM Revenue and Customs; [Available from:  
30 28 <https://www.gov.uk/government/publications/exchange-rates-for-customs-and-vat-yearly>.  
31 29 34. HMRC. HMRC yearly average and spot rates: HM Revenue and Customs; 2022 [Available from:  
32 30 <https://www.gov.uk/government/publications/exchange-rates-for-customs-and-vat-yearly>.  
33 31 35. Orphanet. The portal for rare diseases and orphan drugs 2022 [Available from:  
34 32 [https://www.orpha.net/consor/cgi-bin/Disease\\_Search\\_Simple.php?lng=EN](https://www.orpha.net/consor/cgi-bin/Disease_Search_Simple.php?lng=EN).  
35 33 36. Rothman SM, Raveis VH, Friedman A, et al. Health Advocacy Organizations and the  
36 34 Pharmaceutical Industry: An Analysis of Disclosure Practices. *American Journal of Public  
37 35 Health* 2011;101(4):602-09. doi: 10.2105/AJPH.2010.300027  
38 36 37. European Medicines Agency. Criteria to be fulfilled by patient, consumer and healthcare  
39 37 professional organisations involved in European Medicines Agency (EMA) activities 2018  
40 38 [Available from: [https://www.ema.europa.eu/en/documents/regulatory-procedural-  
41 39 guideline/criteria-be-fulfilled-patient-consumer-healthcare-professional-organisations-  
42 40 involved-european\\_en.pdf](https://www.ema.europa.eu/en/documents/regulatory-procedural-guideline/criteria-be-fulfilled-patient-consumer-healthcare-professional-organisations-involved-european_en.pdf).  
43 41 38. NICE. Policy on declaring and managing interests for NICE advisory committees, 2018.  
44 42 39. WHO. ICD-11 for Mortality and Morbidity Statistics 2022 [Available from:  
45 43 <https://icd.who.int/browse11/l-m/en#/http://id.who.int/icd/entity/465177735?view=G0>.  
46 44 40. NIH U.S. National Library of Medicine. ClinicalTrials.gov [Available from:  
47 45 <https://clinicaltrials.gov/2022>.  
48 46 41. Ozieranski P, Csanadi M, Rickard E, et al. Analysis of Pharmaceutical Industry Payments to UK  
49 47 Health Care Organizations in 2015. 2019(2574-3805 (Electronic))  
50 48 42. Blood Cancer UK. Blood cancer types [Available from:  
51 49 <https://bloodcancer.org.uk/understanding-blood-cancer/blood-cancer-types/2023>.  
52 50 43. Hughes DA, Poletti-Hughes J. Profitability and Market Value of Orphan Drug Companies: A  
53 51 Retrospective, Propensity-Matched Case-Control Study. 2016(1932-6203 (Electronic))  
54 52 44. McCoy MS, Carniol M, Chockley K, et al. Conflicts of Interest for Patient-Advocacy  
55 53 Organizations. *New England Journal of Medicine* 2017;376(9):880-85. doi:  
56 54 10.1056/NEJMSr1610625

- 1  
2  
3 1 45. Jones K. In whose interest? Relationships between health consumer groups and the  
4 2 pharmaceutical industry in the UK. 2008(1467-9566 (Electronic))  
5 3 46. Mandeville KL, Barker R, Packham A, et al. Financial interests of patient organisations  
6 4 contributing to technology assessment at England's National Institute for Health and Care  
7 5 Excellence: policy review. *BMJ* 2019;364:k5300. doi: 10.1136/bmj.k5300  
8 6 47. Mavris M, Le Cam Y. Involvement of patient organisations in research and development of  
9 7 orphan drugs for rare diseases in europe. 2012(1661-8769 (Print))  
10 8 48. Bedlington N, Geissler J, Houyez F, et al. Role of Patient Organisations. In: Facey KM, Ploug  
11 9 Hansen H, Single ANV, eds. Patient Involvement in Health Technology Assessment.  
12 10 Singapore: Springer Singapore 2017:401-10.  
13 11 49. European Medicines Agency. European public assessment reports (EPAR), 2022.  
14 12 50. Baggott R, Jones K. The Big Society in an age of austerity: threats and opportunities for Health  
15 13 Consumer and Patients' Organizations in England. 2015(1369-7625 (Electronic))  
16 14 51. Lexchin J. Association between commercial funding of Canadian patient groups and their views  
17 15 about funding of medicines: An observational study. *PLOS ONE* 2019;14(2):e0212399. doi:  
18 16 10.1371/journal.pone.0212399  
19 17 52. McCoy MS, Emanuel EJ. Why There Are No "Potential" Conflicts of Interest. *JAMA*  
20 18 2017;317(17):1721-22. doi: 10.1001/jama.2017.2308  
21 19 53. Das S, Ungeod-Thomas J. Revealed: experts who praised new 'skinny jab' received payments  
22 20 from drug maker. *The Guardian* 2023.  
23 21 54. Ozieranski P, Martinon L, Jachiet P-A, et al. Accessibility and quality of drug company  
24 22 disclosures of payments to healthcare professionals and organisations in 37 countries: a  
25 23 European policy review. *BMJ Open* 2021;11(12):e053138. doi: 10.1136/bmjopen-2021-  
26 24 053138  
27 25 55. Vertex Pharmaceuticals Incorporated. Our Science [Available from: [https://www.vrtx.com/our-](https://www.vrtx.com/our-science/2023)  
28 26 [science/2023](https://www.vrtx.com/our-science/2023).  
29 27 56. Ozieranski P, Csanádi M, Rickard E, et al. Under-reported relationship: a comparative study of  
30 28 pharmaceutical industry and patient organisation payment disclosures in the UK (2012–2016).  
31 29 *BMJ Open* 2020;10(9):e037351. doi: 10.1136/bmjopen-2020-037351  
32 30 57. Colombo C, Mosconi P, Villani W, et al. Patient organizations' funding from pharmaceutical  
33 31 companies: is disclosure clear, complete and accessible to the public? An Italian survey. *PLoS*  
34 32 *One* 2012;7(5):e34974. doi: 10.1371/journal.pone.0034974 [published Online First:  
35 33 20120509]

1  
2  
3 **1 Figure legend**  
4

5 **2 Figure 1.** Classification model to determine company interests in patient organisation funding  
6  
7 **3 Note:** An interest is when there is, or could be perceived to be, an opportunity for a  
8 pharmaceutical company to benefit in the disease area where the patient organisation operates.  
9

10 **5 Figure 2.** Cumulative value of payments by receiving patient organisation type and funding  
11 company in 2020

12 **7 Note:** Non-disease-specific patient organisations include organisations that could not be  
13 matched to specific ICD-11 codes or could not be classified as rare or non-rare, such as hospital  
14 charities, carers organisations, and hospices.  
15  
16

17 **10 Figure 3.** Cumulative value of payments by patient organisation type and therapeutic area  
18 from in 2020

19  
20 **12 Note:** Non-disease-specific patient organisations include organisations that could not be  
21 matched to specific ICD-11 codes or could not be classified as rare or non-rare, such as hospital  
22 charities, carers organisations, and hospices.  
23  
24  
25  
26  
27  
28  
29  
30  
31  
32  
33  
34  
35  
36  
37  
38  
39  
40  
41  
42  
43  
44  
45  
46  
47  
48  
49  
50  
51  
52  
53  
54  
55  
56  
57  
58  
59  
60



Caption: Classification model to determine company interests in patient organisation funding

Notes: An interest is when there is, or could be perceived to be, an opportunity for a pharmaceutical company to benefit in the disease area where the patient organisation operates.

338x190mm (96 x 96 DPI)



1  
2  
3  
4  
5  
6  
7  
8  
9  
10  
11  
12  
13  
14  
15  
16  
17  
18  
19  
20  
21  
22  
23  
24  
25  
26  
27  
28  
29  
30  
31  
32  
33  
34  
35  
36  
37  
38  
39  
40  
41  
42  
43  
44  
45  
46  
47  
48  
49  
50  
51  
52  
53  
54  
55  
56  
57  
58  
59  
60

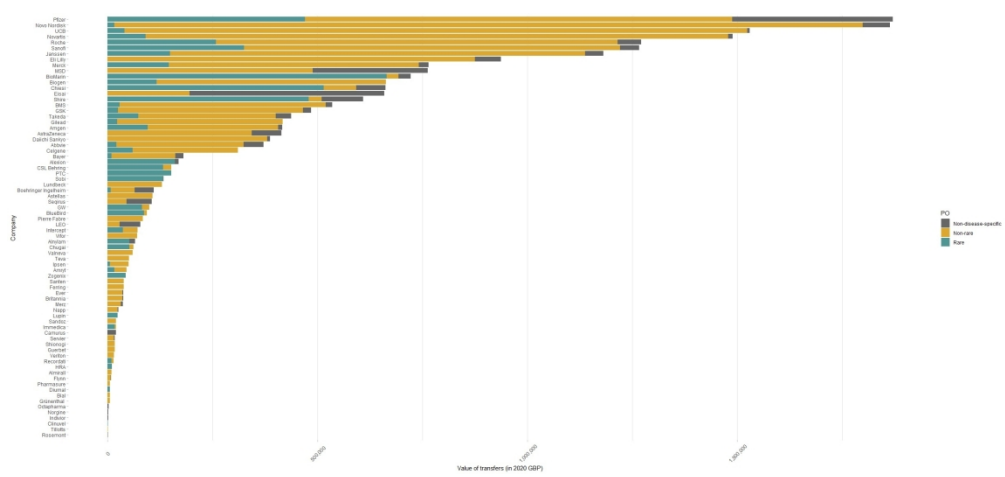

Cumulative value of payments by receiving patient organisation type and funding company in 2020

Note: Non-disease-specific patient organisations include organisations that could not be matched to specific ICD-11 codes or could not be classified as rare or non-rare, such as hospital charities, carers organisations, and hospices.

650x299mm (96 x 96 DPI)

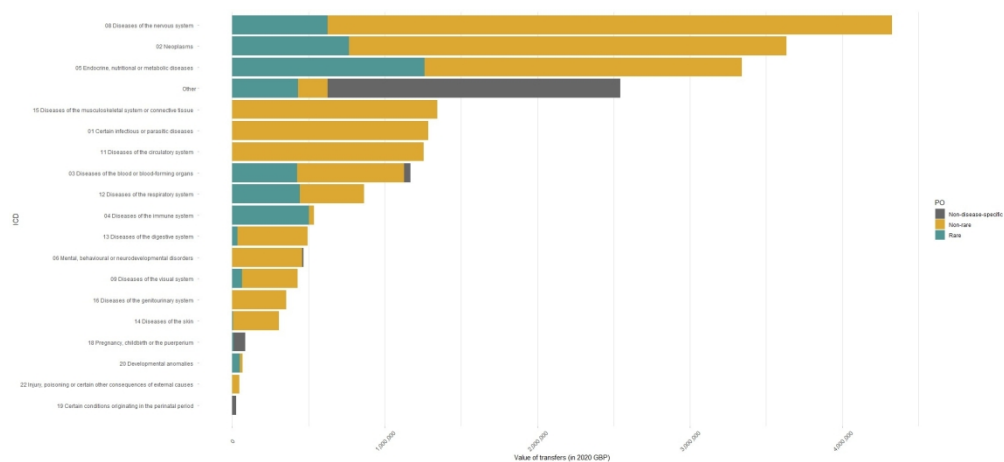

Cumulative value of payments by patient organisation type and therapeutic area from in 2020

Note: Non-disease-specific patient organisations include organisations that could not be matched to specific ICD-11 codes or could not be classified as rare or non-rare, such as hospital charities, carers organisations, and hospices.

581x264mm (96 x 96 DPI)

## 1 Supplemental Material

### 2 Data collection

#### 3 Payments

4 We retrieved data on 2020 payments from pharmaceutical companies to patient organisations  
5 from the following sources:

- 6 1) **Companies' websites**. Disclosing payments to patient organisations is a requirement  
7 of Clause 29 of the Association of British Pharmaceutical Industry (ABPI) Code of  
8 Practice.<sup>1</sup> Specifically, the ABPI requires companies to keep a public record of any  
9 payment made to patient organisations on their website for a minimum of three years  
10 following the payment.<sup>1</sup> Therefore, companies' website were our primary data source  
11 on payments to patient organisations.
- 12 2) **Disclosure UK HCOs database**. In light of a recent study unveiling that payments to  
13 patient organisations were misreported in the Disclosure UK database of payments to  
14 healthcare organisations (HCOs),<sup>2</sup> we also screened the 2020 Disclosure UK HCOs  
15 database for payments to patient organisations.

16 If payments were not disclosed in the company's website nor in the Disclosure UK HCOs  
17 database, we assumed that the company did not make any payments to patient organisations in  
18 2020, as commonly assumed in the literature.<sup>3</sup>

19 One investigator (AG) extracted payment disclosures from the companies' websites. These  
20 comprised the name of the patient organisation, the year when the payment was made, the  
21 reason for the payment and its value in the currency reported by the disclosing company. The  
22 2020 Disclosure UK HCOs database was also screened, and recipients were matched to  
23 standardised patient organisations names. To ensure the data's accuracy, the final database was  
24 scanned for duplicates, but no such instances were found. All payments were first adjusted for  
25 inflation using the ONS Consumer Price Index.<sup>4</sup> When reported in different currencies, such  
26 as United States Dollars (USD), Swiss Franc (CHF), Swedish Krona (SEK), Norwegian Krone  
27 (NKK) and Danish Krone (DKK), the value of the payment was converted to Great British  
28 Pounds (GBP), using the ONS historical yearly conversion rates.<sup>5 6</sup> Two in-kind payments  
29 with a monetary value of zero were excluded from the analysis. Further details on variables'  
30 cleaning and coding can be found in the Supplemental Material.

#### 31 **Therapeutic areas**

32 Patient organisations' websites were also screened to understand the condition(s) they focused  
33 on. For example, in the case of *Blood Cancer UK*, their mission is to "beat blood cancer",  
34 therefore, the condition supported was coded as blood cancer.

35 After being identified as described above, conditions were further classified into rare and non-  
36 rare.

1  
2  
3 1 Conditions were considered rare if they appeared in the Orphanet database of rare diseases  
4 2 regardless of their classification level (group of disorders, disorders or subtypes of disorders).<sup>7</sup>  
5 3 For example, multiple myeloma appears in the Orphanet database of rare diseases, therefore a  
6 4 patient organisation focusing this condition would be categorised as rare-focused. When  
7 5 condition sub-types appeared in the Orphanet database, the patient organisation's website was  
8 6 screened to check whether its focus was on rare conditions. For example, *Metabolic Support*  
9 7 *UK's* motto is "Your rare condition. Our common fight" and was therefore assumed to be rare  
10 8 disease-focused. Conversely, should a patient organisation focus on a broader condition such  
11 9 as blood cancer with no sole focus on rare conditions, the organisation would be conservatively  
12 10 considered non-rare. While this approach was preferred as it did not require further  
13 11 assumptions, it entails that only more specialised patient organisation are considered as rare.  
14 12 Such approach might have led to the number and overall value of payments from  
15 13 pharmaceutical companies to rare diseases-focused patient organisations being underestimated,  
16 14 as these organisations are expected to get less payments than more generalist ones (e.g. multiple  
17 15 myeloma vs blood cancer).

18 16 A third category (*unclear*) was created for non-disease-specific patient organisations, such as  
19 17 coalition of charities or organisations focused on palliative care for terminally ill patients. This  
20 18 category was excluded from the main analyses, but sub-group analyses are reported at the end  
21 19 of the Supplemental Material.

### 22 20 **Companies' interest**

23 21 We developed a methodology to assess the extent to which a pharmaceutical company holds  
24 22 an interest in the disease supported by a patient organisation. For the purpose of this analysis,  
25 23 we adapted the definition of interest provided by NICE.<sup>8</sup> An interest is when there is, or could  
26 24 be perceived to be, an opportunity for a pharmaceutical company to benefit in the disease area  
27 25 where the patient organisation operates. This could include situations where the pharmaceutical  
28 26 company has a drug developed or in development for a condition supported by the patient  
29 27 organisation, or where a drug in the company's portfolio or pipeline is restricted to a specific  
30 28 population affected by the disease supported by the patient organisation.

31 29 As first step, the conditions supported by patient organisations were translated into ICD-11  
32 30 codes using the online ICD-11 database.<sup>9</sup>

33 31 ICD-11 codes are mutually exclusive, exhaustive and are arranged as a single hierarchical tree.  
34 32 This means that specific diseases are nested within broader classifications. An example for  
35 33 multiple myeloma is shown in Table 1 below.

36 34  
37 35  
38 36  
39 37  
40 38  
41 39  
42 40  
43 41  
44 42  
45 43  
46 44  
47 45  
48 46  
49 47  
50 48  
51 49  
52 50  
53 51  
54 52  
55 53  
56 54  
57 55  
58 56  
59 57  
60 58

**Table 1. Example of ICD-11 classification, Multiple myeloma**

| Hierarchy level | Condition                                       | ICD-11 code |
|-----------------|-------------------------------------------------|-------------|
| Level 1         | Neoplasms                                       | 2           |
| Level 2         | Neoplasms of haematopoietic or lymphoid tissues | 2A          |
| Level 3         | Mature B-cell neoplasms                         | 2A8         |
| Level 4         | Plasma cell neoplasms                           | 2A83        |
| Level 5         | Plasma cell myeloma                             | 2A83.1      |

In this example, multiple myeloma is nested within *Plasma cell myeloma*, who is in its turn nested within *Plasma cell neoplasms* and so on up to *Neoplasms*.

Subsequently, companies' annual reports, website and the ClinicalTrials.gov database were searched to assess whether the each company had an interest in the condition supported by the patient organisation receiving the payment. The diagram in the main document (Figure 1) schematically illustrates the approach taken to understand whether the company definitely, probably or did not have an interest in the condition. Figure 1 below illustrates the source of companies' interests.

For example, if *Company X* reports in its annual report having a drug in development for multiple myeloma and transferred a sum of money to *Blood Cancer UK*, this would be coded as *probably yes*, as the company has a product in its pipeline or portfolio associated with a condition supported by the patient organisation. In this case, the ICD-11 level would be 2, *Neoplasms of haematopoietic or lymphoid tissue*, under which multiple myeloma is nested. Conversely, should *Company X* have made a payment to *Myeloma UK*, this would have been coded as *definitely yes*, as there is perfect alignment between the condition supported by the patient organisation and by *Company X's* drug.

Situations where a company's interest in a certain condition could not be identified indicate an impossibility of identifying such link, rather than the lack thereof.

**Figure 1. Source of companies interests**

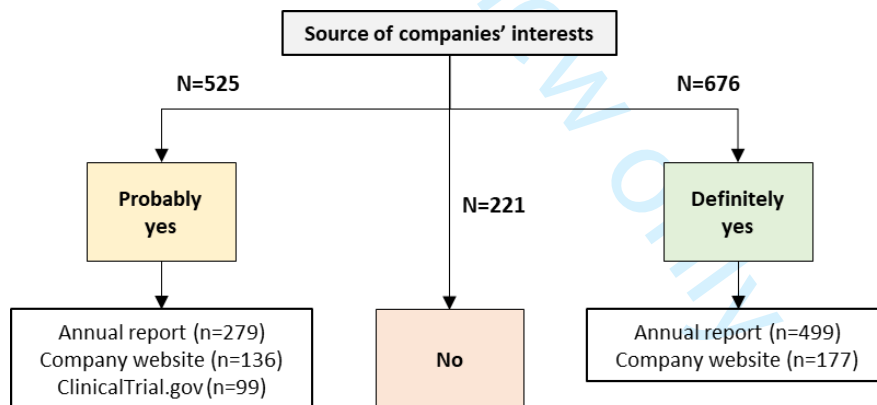

## 1 Variables cleaning and coding

2 Table 2. Description of key variables in payment database

| Variables name              | Description                                                                                 | Details                                                                                                                                                                                                                                                                                                                                                                                                                                                                                                                                                                                                                                                                                                                                                     |
|-----------------------------|---------------------------------------------------------------------------------------------|-------------------------------------------------------------------------------------------------------------------------------------------------------------------------------------------------------------------------------------------------------------------------------------------------------------------------------------------------------------------------------------------------------------------------------------------------------------------------------------------------------------------------------------------------------------------------------------------------------------------------------------------------------------------------------------------------------------------------------------------------------------|
| <b>Company</b>              | Standardised company name                                                                   | Company name as reported on company website and/or on HCOs database. Two mergers involving companies included in our analysis—BMS and Celgene, and Takeda and Shire—were completed prior to 2020. Although these companies had merged, we treated them as separate entities because their disclosures were reported separately even after the acquisition.                                                                                                                                                                                                                                                                                                                                                                                                  |
| <b>ABPI member</b>          | ABPI membership of company; <i>source: <a href="#">ABPI full members list</a></i>           | 0 = not ABPI member, 1 = ABPI member                                                                                                                                                                                                                                                                                                                                                                                                                                                                                                                                                                                                                                                                                                                        |
| <b>Company_condition</b>    | Concatenation of company name and disease area targeted by the patient organisation         | Concatenation used for coding and analysis purposes                                                                                                                                                                                                                                                                                                                                                                                                                                                                                                                                                                                                                                                                                                         |
| <b>Company interest</b>     | Whether the company hold an interest* in the condition targeted by the patient organisation | <ul style="list-style-type: none"> <li>- <b>Definitely yes:</b> the company's annual report or website list a product for the condition targeted by the patient organisation in its portfolio/pipeline (ICD-11 level 4 or above)</li> <li>- <b>Probably yes:</b> the company's annual report or website list a product for the condition targeted by the patient organisation in its portfolio/pipeline OR a clinical trial for which the company is sponsor is listed for the disease targeted by the patient organisation OR a drug in the company's pipeline/portfolio is restricted to a specific population affected by the disease targeted by the patient organisation (ICD-11 level 3 or below)</li> <li>- <b>No :</b> None of the above</li> </ul> |
| <b>Source</b>               | Source of company interest variable                                                         | Annual report, company website, ClinicalTrials.gov, none                                                                                                                                                                                                                                                                                                                                                                                                                                                                                                                                                                                                                                                                                                    |
| <b>Name of PO</b>           | Name of patient organization as reported by companies in disclosure report                  | -                                                                                                                                                                                                                                                                                                                                                                                                                                                                                                                                                                                                                                                                                                                                                           |
| <b>Standardised PO name</b> | Standardised name of patient organization to avoid duplicates and inconsistencies           | <p>For coding purposes, names of patient organisations were standardised. The following steps were taken:</p> <ol style="list-style-type: none"> <li>1. Patient organisations' names for typos, abbreviations, spelling mistakes and duplicated within the companies' disclosures (e.g. Crohn's &amp; Colitis UK and CCUK would both be standardized to Crohn's and Colitis UK);</li> <li>2. If the patient organisation changed name over time, the latest name on record was used;</li> </ol>                                                                                                                                                                                                                                                             |

|                                                   |                                                                                                                                                                                                                                                                |                                                                                                                                                                                                                                                                                                                                                                                                                                                                                                                                          |
|---------------------------------------------------|----------------------------------------------------------------------------------------------------------------------------------------------------------------------------------------------------------------------------------------------------------------|------------------------------------------------------------------------------------------------------------------------------------------------------------------------------------------------------------------------------------------------------------------------------------------------------------------------------------------------------------------------------------------------------------------------------------------------------------------------------------------------------------------------------------------|
|                                                   |                                                                                                                                                                                                                                                                | <p>3. If the two patient organisations merged over the study period, the name of the merged entity was used (e.g. the British Lung Foundation and Asthma UK merged into Asthma + Lung UK);</p> <p>4. Separate entries were made for patient organisations under the same umbrella but focusing on different geographical entities (e.g. Alzheimer UK vs Alzheimer Scotland)</p>                                                                                                                                                          |
| <b>Reason for exclusion</b>                       | Reason why the organisation was excluded from the analysis                                                                                                                                                                                                     | <ul style="list-style-type: none"> <li>- Not UK organisation (not aligned with geographical scope e.g. Irish, US-based);</li> <li>- For profit company (not aligned with definition of patient organization used in the study);</li> <li>- Missing information (organisations for whose nature is unclear i.e. patient organisation website could not be identified)</li> </ul>                                                                                                                                                          |
| <b>ICD-11</b>                                     | Classification of disease targeted by the patient organisation according to the WHO ICD-11; <i>source: <a href="#">ICD WHO website</a></i>                                                                                                                     | General classification (ICD-11 chapters)<br><i>See Excel file, Inputs tab</i>                                                                                                                                                                                                                                                                                                                                                                                                                                                            |
| <b>Condition</b>                                  | Condition targeted by patient organisation as reported on website                                                                                                                                                                                              | e.g. Blood Cancer UK would fall under ICD-11 code 02 Neoplasms, with <i>blood cancer</i> being the condition                                                                                                                                                                                                                                                                                                                                                                                                                             |
| <b>Charity number (if any)</b>                    | Charity number as reported in the organization website or as reported in the <a href="#">England and Wales Charity Commission website</a>                                                                                                                      | When both England/Wales and Scotland or Northern Ireland charity numbers were provided, the former was chosen. Scotland and Northern Ireland charity numbers were reported only when those for England/Wales were missing                                                                                                                                                                                                                                                                                                                |
| <b>Company number (if charity number missing)</b> | Company number as reported in the organization website or as reported in the <a href="#">Government Company Information Service website</a> if the patient organization cannot be found in the charity commission database (e.g. limited by guarantee company) | When both England/Wales and Scotland or Northern Ireland charity numbers were provided, the former was chosen. Scotland and Northern Ireland charity numbers were reported only when those for England/Wales were missing                                                                                                                                                                                                                                                                                                                |
| <b>Link</b>                                       | Link of patient organisation website                                                                                                                                                                                                                           | -                                                                                                                                                                                                                                                                                                                                                                                                                                                                                                                                        |
| <b>Rare disease</b>                               | Whether the condition or one of the conditions targeted by the patient organisation is considered as rare                                                                                                                                                      | <p>A condition was considered as rare if it under at least one of the following criteria:</p> <ol style="list-style-type: none"> <li>1. The condition is listed in <a href="#">Orphanet list of rare diseases</a> regardless of its ICD-11 level classification;</li> <li>2. In their website, the patient organisation explicitly describe the disease they target as rare (e.g. <i>Metabolic Support UK's</i> motto is “<i>Your rare condition. Our common fight</i>” and was therefore assumed to be rare disease-focused)</li> </ol> |

|                             |                                                                                     |                                                                                                           |
|-----------------------------|-------------------------------------------------------------------------------------|-----------------------------------------------------------------------------------------------------------|
| <b>Details of payment</b>   | Details of payment as reported by companies in disclosure report                    | -                                                                                                         |
| <b>Country</b>              | Country of payment                                                                  | The country considered for the entire database is the UK                                                  |
| <b>Year</b>                 | Year of payment                                                                     | 2020                                                                                                      |
| <b>Currency</b>             | Currency of payment                                                                 | Currency the payment is reported in the disclosure reports (i.e. EUR, GBP, USD, CHF, SEK, NKK)            |
| <b>Currency_year</b>        | Concatenation of currency and year of payment for conversion purposes               | -                                                                                                         |
| <b>Value of payment</b>     | Value of payment in original currency as reported by companies in disclosure report | In-kind payments were removed from the analysis as no monetary value could be associated to such payments |
| <b>Value in 2020 pounds</b> | GBP converted and inflation adjusted value of payment                               | See details in <i>Inputs</i> sheet                                                                        |

\*An interest is when there is, or could be perceived to be, an opportunity for a pharmaceutical company to benefit in the disease area where the patient organisation operates.



## 1 Disclosure details

2 **Table 3. Reporting of payments to patient organizations by pharmaceutical companies:**  
 3 **comparison of company websites and Disclosure UK HCOs database**

| Company              | Company website only | HCOs database only | Both |
|----------------------|----------------------|--------------------|------|
| Abbvie               | X                    |                    |      |
| Alexion              | X                    |                    |      |
| Almirall             | X                    |                    |      |
| Alnylam              |                      |                    | X    |
| Amgen                |                      |                    | X    |
| Amryt                | X                    |                    |      |
| Astellas             |                      |                    | X    |
| AstraZeneca          |                      |                    | X    |
| BMS                  |                      |                    | X    |
| Bayer                |                      |                    | X    |
| Bial                 |                      | X                  |      |
| BioMarin             |                      |                    | X    |
| Biogen               | X                    |                    |      |
| BlueBird             | X                    |                    |      |
| Boehringer Ingelheim |                      |                    | X    |
| Britannia            |                      |                    | X    |
| CSL Behring          | X                    |                    |      |
| Camurus              |                      |                    | X    |
| Celgene              |                      |                    | X    |
| Chiesi               |                      |                    | X    |
| Chugai               | X                    |                    |      |
| Clinuvel             | X                    |                    |      |
| Daiichi Sankyo       |                      |                    | X    |
| Diurnal              | X                    |                    |      |
| Eisai                |                      |                    | X    |
| Eli Lilly            |                      |                    | X    |
| Ever                 |                      |                    | X    |
| Ferring              |                      | X                  |      |
| Flynn                |                      | X                  |      |
| GSK                  |                      |                    | X    |
| GW                   |                      |                    | X    |
| Gilead               |                      | X                  |      |
| Grünenthal           |                      |                    | X    |
| Guerbet              |                      | X                  |      |
| HRA                  |                      | X                  |      |
| Immedica             | X                    |                    |      |
| Indivior             | X                    |                    |      |
| Intercept            | X                    |                    |      |
| Ipsen                |                      | X                  |      |
| Janssen              |                      |                    | X    |

|                    |         |         |         |
|--------------------|---------|---------|---------|
| LEO                | X       |         |         |
| Lundbeck           |         |         | X       |
| Lupin              | X       |         |         |
| MSD                |         |         | X       |
| Merck              |         |         | X       |
| Merz               |         |         | X       |
| Napp               |         |         | X       |
| Norgine            |         | X       |         |
| Novartis           |         |         | X       |
| Novo Nordisk       |         |         | X       |
| Octapharma         |         | X       |         |
| PTC                | X       |         |         |
| Pfizer             |         |         | X       |
| Pharmasure         |         | X       |         |
| Pierre Fabre       |         |         | X       |
| Recordati          | X       |         |         |
| Roche              |         |         | X       |
| Rosemont           |         |         | X       |
| Sandoz             |         | X       |         |
| Sanofi             |         |         | X       |
| Santen             | X       |         |         |
| Seqirus            | X       |         |         |
| Servier            | X       |         |         |
| Shionogi           |         | X       |         |
| Shire              |         |         | X       |
| Sobi               | X       |         |         |
| Takeda             |         |         | X       |
| Teva               |         | X       |         |
| Tillotts           | X       |         |         |
| UCB                |         |         | X       |
| Valneva            | X       |         |         |
| Veriton            |         | X       |         |
| Vifor              |         |         | X       |
| Zogenix            | X       |         |         |
| <b>Total (n;%)</b> | 24; 32% | 14; 19% | 36; 49% |

**Table 4. Reporting of payments to patient organizations by pharmaceutical companies: payments disclosed on company websites and Disclosure UK HCOs database**

| Company  | Payments reported on company website (£) | Payments reported on HCOs database (£) | Total     |
|----------|------------------------------------------|----------------------------------------|-----------|
| Abbvie   | £ 371,503                                | £ -                                    | £ 371,503 |
| Alexion  | £ 168,925                                | £ -                                    | £ 168,925 |
| Almirall | £ 9,775                                  | £ -                                    | £ 9,775   |
| Alnylam  | £ 51,559                                 | £ 14,050                               | £ 65,609  |
| Amgen    | £ 347,757                                | £ 68,845                               | £ 416,602 |

|    |                       |             |             |             |
|----|-----------------------|-------------|-------------|-------------|
| 1  |                       |             |             |             |
| 2  |                       |             |             |             |
| 3  |                       |             |             |             |
| 4  | <b>Amryt</b>          | £ 45,413    | £ -         | £ 45,413    |
| 5  | <b>Astellas</b>       | £ 94,583    | £ 13,071    | £ 107,654   |
| 6  | <b>AstraZeneca</b>    | £ 326,201   | £ 88,175    | £ 414,376   |
| 7  | <b>BMS</b>            | £ 517,082   | £ 17,750    | £ 534,832   |
| 8  | <b>Bayer</b>          | £ 171,758   | £ 9,098     | £ 180,856   |
| 9  | <b>Bial</b>           | £ -         | £ 5,500     | £ 5,500     |
| 10 | <b>BioMarin</b>       | £ 411,912   | £ 310,455   | £ 722,367   |
| 11 | <b>Biogen</b>         | £ 663,142   | £ -         | £ 663,142   |
| 12 | <b>BlueBird</b>       | £ 94,000    | £ -         | £ 94,000    |
| 13 | <b>Boehringer</b>     |             |             |             |
| 14 | <b>Ingelheim</b>      | £ 79,762    | £ 30,000    | £ 109,762   |
| 15 | <b>Britannia</b>      | £ 35,000    | £ 2,030     | £ 37,030    |
| 16 | <b>CSL Behring</b>    | £ 152,192   | £ -         | £ 152,192   |
| 17 | <b>Camurus</b>        | £ 13,168    | £ 6,500     | £ 19,668    |
| 18 | <b>Celgene</b>        | £ 310,329   | £ 640       | £ 310,969   |
| 19 | <b>Chiesi</b>         | £ 602,259   | £ 60,000    | £ 662,259   |
| 20 | <b>Chugai</b>         | £ 62,092    | £ -         | £ 62,092    |
| 21 | <b>Clinuvel</b>       | £ 1,000     | £ -         | £ 1,000     |
| 22 | <b>Daiichi Sankyo</b> | £ 57,879    | £ 329,385   | £ 387,264   |
| 23 | <b>Diurnal</b>        | £ 6,000     | £ -         | £ 6,000     |
| 24 | <b>Eisai</b>          | £ 476,271   | £ 183,207   | £ 659,478   |
| 25 | <b>Eli Lilly</b>      | £ 874,288   | £ 62,690    | £ 936,978   |
| 26 | <b>Ever</b>           | £ 18,934    | £ 18,934    | £ 37,867    |
| 27 | <b>Ferring</b>        | £ -         | £ 38,000    | £ 38,000    |
| 28 | <b>Flynn</b>          | £ -         | £ 8,002     | £ 8,002     |
| 29 | <b>GSK</b>            | £ 325,410   | £ 159,064   | £ 484,474   |
| 30 | <b>GW</b>             | £ 98,788    | £ 303       | £ 99,091    |
| 31 | <b>Gilead</b>         | £ -         | £ 417,448   | £ 417,448   |
| 32 | <b>Grünenthal</b>     | £ 4,200     | £ 1,000     | £ 5,200     |
| 33 | <b>Guerbet</b>        | £ -         | £ 17,000    | £ 17,000    |
| 34 | <b>HRA</b>            | £ -         | £ 10,000    | £ 10,000    |
| 35 | <b>Immedica</b>       | £ 19,954    | £ -         | £ 19,954    |
| 36 | <b>Indivior</b>       | £ 1,200     | £ -         | £ 1,200     |
| 37 | <b>Intercept</b>      | £ 71,712    | £ -         | £ 71,712    |
| 38 | <b>Ipsen</b>          | £ -         | £ 50,050    | £ 50,050    |
| 39 | <b>Janssen</b>        | £ 1,170,768 | £ 10,000    | £ 1,180,768 |
| 40 | <b>LEO</b>            | £ 78,633    | £ -         | £ 78,633    |
| 41 | <b>Lundbeck</b>       | £ 89,400    | £ 40,309    | £ 129,709   |
| 42 | <b>Lupin</b>          | £ 24,000    | £ -         | £ 24,000    |
| 43 | <b>MSD</b>            | £ 537,632   | £ 225,287   | £ 762,919   |
| 44 | <b>Merck</b>          | £ 763,885   | £ 1,000     | £ 764,885   |
| 45 | <b>Merz</b>           | £ 31,114    | £ 5,789     | £ 36,903    |
| 46 | <b>Napp</b>           | £ 8,000     | £ 18,020    | £ 26,020    |
| 47 | <b>Norgine</b>        | £ -         | £ 1,240     | £ 1,240     |
| 48 | <b>Novartis</b>       | £ 1,442,037 | £ 46,812    | £ 1,488,849 |
| 49 | <b>Novo Nordisk</b>   | £ 452,113   | £ 1,411,598 | £ 1,863,711 |
| 50 |                       |             |             |             |
| 51 |                       |             |             |             |
| 52 |                       |             |             |             |
| 53 |                       |             |             |             |
| 54 |                       |             |             |             |
| 55 |                       |             |             |             |
| 56 |                       |             |             |             |
| 57 |                       |             |             |             |
| 58 |                       |             |             |             |
| 59 |                       |             |             |             |
| 60 |                       |             |             |             |

|                     |                  |                 |                   |
|---------------------|------------------|-----------------|-------------------|
| <b>Octapharma</b>   | £ -              | £ 2,995         | £ 2,995           |
| <b>PTC</b>          | £ 151,433        | £ -             | £ 151,433         |
| <b>Pfizer</b>       | £ 1,360,510      | £ 509,793       | £ 1,870,303       |
| <b>Pharmasure</b>   | £ -              | £ 6,000         | £ 6,000           |
| <b>Pierre Fabre</b> | £ 50,010         | £ 34,096        | £ 84,106          |
| <b>Recordati</b>    | £ 14,500         | £ -             | £ 14,500          |
| <b>Roche</b>        | £ 1,169,578      | £ 101,395       | £ 1,270,973       |
| <b>Rosemont</b>     | £ 200            | £ 200           | £ 400             |
| <b>Sandoz</b>       | £ -              | £ 20,000        | £ 20,000          |
| <b>Sanofi</b>       | £ 1,262,802      | £ 3,825         | £ 1,266,627       |
| <b>Santen</b>       | £ 38,170         | £ -             | £ 38,170          |
| <b>Seqirus</b>      | £ 105,000        | £ -             | £ 105,000         |
| <b>Servier</b>      | £ 17,163         | £ -             | £ 17,163          |
| <b>Shionogi</b>     | £ -              | £ 17,000        | £ 17,000          |
| <b>Shire</b>        | £ 555,244        | £ 53,980        | £ 609,224         |
| <b>Sobi</b>         | £ 132,988        | £ -             | £ 132,988         |
| <b>Takeda</b>       | £ 420,549        | £ 17,270        | £ 437,819         |
| <b>Teva</b>         | £ -              | £ 51,410        | £ 51,410          |
| <b>Tillotts</b>     | £ 830            | £ -             | £ 830             |
| <b>UCB</b>          | £ 1,493,896      | £ 35,378        | £ 1,529,274       |
| <b>Valneva</b>      | £ 59,512         | £ -             | £ 59,512          |
| <b>Veriton</b>      | £ -              | £ 15,000        | £ 15,000          |
| <b>Vifor</b>        | £ 58,083         | £ 12,000        | £ 70,083          |
| <b>Zogenix</b>      | £ 43,625         | £ -             | £ 43,625          |
| <b>Total (£;%)</b>  | £18,015,722; 80% | £4,561,593; 20% | £22,577,314; 100% |

1

Table 5. Companies' commercial interests by ICD-11 codes according to 2020 payments

| Company              | ICD-11 |    |    |    |    |    |    |    |    |    |    |    |    |    |    |    |    |    |       |
|----------------------|--------|----|----|----|----|----|----|----|----|----|----|----|----|----|----|----|----|----|-------|
|                      | 01     | 02 | 03 | 04 | 05 | 06 | 08 | 09 | 11 | 12 | 13 | 14 | 15 | 16 | 18 | 19 | 20 | 22 | Other |
| Abbvie               | 1      | 1  | 0  | 0  | 0  | 0  | 1  | 0  | 0  | 0  | 1  | 1  | 1  | 0  | 0  | 0  | 0  | 0  | 0     |
| Alexion              | 0      | 0  | 1  | 0  | 1  | 0  | 0  | 0  | 0  | 0  | 0  | 0  | 0  | 0  | 0  | 0  | 0  | 0  | 0     |
| Almirall             | 0      | 0  | 0  | 0  | 0  | 0  | 0  | 0  | 0  | 0  | 0  | 1  | 0  | 0  | 0  | 0  | 0  | 0  | 0     |
| Alnylam              | 0      | 0  | 0  | 0  | 1  | 0  | 0  | 0  | 0  | 0  | 0  | 0  | 0  | 0  | 0  | 0  | 0  | 0  | 0     |
| Amgen                | 0      | 1  | 1  | 0  | 0  | 0  | 0  | 0  | 0  | 0  | 1  | 1  | 1  | 0  | 0  | 0  | 0  | 0  | 0     |
| Amryt                | 0      | 0  | 0  | 0  | 1  | 0  | 0  | 0  | 0  | 0  | 0  | 0  | 0  | 0  | 0  | 0  | 0  | 0  | 0     |
| Astellas             | 0      | 1  | 0  | 0  | 0  | 0  | 0  | 0  | 0  | 0  | 0  | 0  | 0  | 0  | 0  | 0  | 0  | 0  | 0     |
| AstraZeneca          | 0      | 1  | 0  | 0  | 1  | 0  | 0  | 0  | 1  | 0  | 0  | 0  | 0  | 1  | 0  | 0  | 0  | 0  | 0     |
| BMS                  | 0      | 1  | 0  | 0  | 0  | 0  | 1  | 0  | 1  | 0  | 0  | 0  | 1  | 0  | 0  | 0  | 0  | 0  | 0     |
| Bayer                | 0      | 1  | 0  | 0  | 0  | 0  | 0  | 1  | 1  | 0  | 0  | 0  | 0  | 0  | 0  | 0  | 0  | 0  | 0     |
| Bial                 | 0      | 0  | 0  | 0  | 0  | 0  | 1  | 0  | 0  | 0  | 0  | 0  | 0  | 0  | 0  | 0  | 0  | 0  | 0     |
| BioMarin             | 0      | 0  | 1  | 0  | 1  | 0  | 0  | 0  | 0  | 0  | 0  | 0  | 0  | 0  | 0  | 0  | 0  | 0  | 0     |
| Biogen               | 0      | 0  | 0  | 0  | 0  | 0  | 1  | 1  | 0  | 0  | 0  | 0  | 1  | 0  | 0  | 0  | 0  | 0  | 0     |
| BlueBird             | 0      | 0  | 1  | 0  | 0  | 0  | 1  | 0  | 0  | 0  | 0  | 0  | 0  | 0  | 0  | 0  | 0  | 0  | 0     |
| Boehringer Ingelheim | 0      | 0  | 0  | 1  | 0  | 0  | 0  | 0  | 0  | 1  | 0  | 0  | 0  | 0  | 0  | 0  | 0  | 0  | 0     |
| Britannia            | 0      | 0  | 0  | 0  | 0  | 0  | 1  | 0  | 0  | 0  | 0  | 0  | 0  | 0  | 0  | 0  | 0  | 0  | 0     |
| CSL Behring          | 1      | 0  | 1  | 1  | 0  | 0  | 0  | 0  | 0  | 0  | 0  | 0  | 0  | 0  | 0  | 0  | 0  | 0  | 0     |
| Camurus              | 0      | 0  | 0  | 0  | 0  | 0  | 0  | 0  | 0  | 0  | 0  | 0  | 0  | 0  | 0  | 0  | 0  | 0  | 0     |
| Celgene              | 0      | 1  | 0  | 0  | 0  | 0  | 0  | 0  | 0  | 0  | 0  | 0  | 0  | 0  | 0  | 0  | 0  | 0  | 0     |
| Chiesi               | 0      | 0  | 1  | 0  | 1  | 0  | 0  | 0  | 0  | 1  | 0  | 0  | 0  | 0  | 0  | 0  | 0  | 0  | 0     |
| Chugai               | 0      | 0  | 1  | 0  | 0  | 0  | 0  | 0  | 0  | 0  | 0  | 0  | 1  | 0  | 0  | 0  | 0  | 0  | 0     |
| Clinuvel             | 0      | 0  | 0  | 0  | 1  | 0  | 0  | 0  | 0  | 0  | 0  | 0  | 0  | 0  | 0  | 0  | 0  | 0  | 0     |
| Daiichi Sankyo       | 0      | 1  | 0  | 0  | 0  | 0  | 0  | 0  | 1  | 0  | 0  | 0  | 0  | 0  | 0  | 0  | 0  | 0  | 0     |
| Diurnal              | 0      | 0  | 0  | 0  | 1  | 0  | 0  | 0  | 0  | 0  | 0  | 0  | 0  | 0  | 0  | 0  | 0  | 0  | 0     |

|                     |   |   |   |   |   |   |   |   |   |   |   |   |   |   |   |   |   |   |   |
|---------------------|---|---|---|---|---|---|---|---|---|---|---|---|---|---|---|---|---|---|---|
| <b>Eisai</b>        | 0 | 1 | 0 | 0 | 0 | 1 | 1 | 0 | 0 | 0 | 0 | 0 | 0 | 0 | 0 | 0 | 0 | 0 | 0 |
| <b>Eli Lilly</b>    | 0 | 1 | 0 | 0 | 1 | 0 | 1 | 0 | 0 | 0 | 0 | 1 | 1 | 0 | 0 | 0 | 0 | 0 | 0 |
| <b>Ever</b>         | 0 | 0 | 0 | 0 | 0 | 0 | 1 | 0 | 0 | 0 | 0 | 0 | 0 | 0 | 0 | 0 | 0 | 0 | 0 |
| <b>Ferring</b>      | 0 | 1 | 0 | 0 | 0 | 0 | 0 | 0 | 0 | 0 | 0 | 0 | 0 | 1 | 0 | 0 | 0 | 0 | 0 |
| <b>Flynn</b>        | 0 | 0 | 0 | 0 | 0 | 1 | 0 | 0 | 0 | 0 | 0 | 0 | 0 | 0 | 0 | 0 | 0 | 0 | 0 |
| <b>GSK</b>          | 1 | 1 | 0 | 1 | 0 | 0 | 0 | 0 | 1 | 0 | 0 | 0 | 0 | 0 | 0 | 0 | 0 | 0 | 0 |
| <b>GW</b>           | 0 | 0 | 0 | 0 | 0 | 0 | 0 | 0 | 0 | 0 | 0 | 0 | 0 | 0 | 0 | 0 | 0 | 0 | 0 |
| <b>Gilead</b>       | 1 | 1 | 0 | 0 | 0 | 0 | 0 | 0 | 0 | 0 | 1 | 0 | 0 | 0 | 0 | 0 | 0 | 0 | 0 |
| <b>Grünenthal</b>   | 0 | 0 | 0 | 0 | 0 | 0 | 0 | 0 | 0 | 0 | 0 | 0 | 0 | 0 | 0 | 0 | 0 | 0 | 0 |
| <b>Guerbet</b>      | 0 | 0 | 0 | 0 | 0 | 0 | 0 | 0 | 0 | 0 | 0 | 0 | 0 | 1 | 0 | 0 | 0 | 0 | 0 |
| <b>HRA</b>          | 0 | 0 | 0 | 0 | 0 | 0 | 0 | 0 | 0 | 0 | 0 | 0 | 0 | 0 | 0 | 0 | 0 | 0 | 0 |
| <b>Immedica</b>     | 0 | 0 | 0 | 0 | 0 | 0 | 0 | 0 | 0 | 0 | 0 | 0 | 0 | 0 | 0 | 0 | 0 | 0 | 0 |
| <b>Indivior</b>     | 0 | 0 | 0 | 0 | 0 | 0 | 0 | 0 | 0 | 0 | 0 | 0 | 0 | 0 | 0 | 0 | 0 | 0 | 0 |
| <b>Intercept</b>    | 0 | 0 | 0 | 0 | 0 | 0 | 0 | 0 | 0 | 0 | 1 | 0 | 0 | 0 | 0 | 0 | 0 | 0 | 0 |
| <b>Ipsen</b>        | 0 | 1 | 0 | 0 | 0 | 0 | 1 | 0 | 0 | 0 | 0 | 0 | 0 | 0 | 0 | 0 | 0 | 0 | 0 |
| <b>Janssen</b>      | 1 | 1 | 0 | 0 | 0 | 0 | 0 | 0 | 1 | 0 | 1 | 1 | 0 | 0 | 0 | 0 | 0 | 0 | 0 |
| <b>LEO</b>          | 0 | 0 | 0 | 0 | 0 | 0 | 0 | 0 | 1 | 0 | 0 | 1 | 0 | 0 | 0 | 0 | 0 | 0 | 0 |
| <b>Lundbeck</b>     | 0 | 0 | 0 | 0 | 0 | 1 | 1 | 0 | 0 | 0 | 0 | 0 | 0 | 0 | 0 | 0 | 0 | 0 | 0 |
| <b>Lupin</b>        | 0 | 0 | 0 | 0 | 0 | 0 | 1 | 0 | 0 | 0 | 0 | 0 | 0 | 0 | 0 | 0 | 0 | 0 | 0 |
| <b>MSD</b>          | 1 | 1 | 0 | 0 | 0 | 0 | 0 | 0 | 0 | 0 | 0 | 0 | 0 | 0 | 0 | 0 | 0 | 0 | 0 |
| <b>Merck</b>        | 0 | 1 | 0 | 0 | 0 | 0 | 1 | 0 | 0 | 0 | 0 | 0 | 0 | 1 | 0 | 0 | 0 | 0 | 0 |
| <b>Merz</b>         | 0 | 0 | 0 | 0 | 0 | 0 | 0 | 0 | 0 | 0 | 0 | 0 | 0 | 0 | 0 | 0 | 0 | 0 | 0 |
| <b>Napp</b>         | 0 | 0 | 0 | 0 | 1 | 0 | 0 | 0 | 0 | 0 | 0 | 0 | 0 | 0 | 0 | 0 | 0 | 0 | 0 |
| <b>Norgine</b>      | 0 | 0 | 0 | 0 | 0 | 0 | 0 | 0 | 0 | 0 | 0 | 0 | 0 | 0 | 0 | 0 | 0 | 0 | 0 |
| <b>Novartis</b>     | 0 | 1 | 1 | 0 | 0 | 0 | 1 | 1 | 1 | 0 | 0 | 1 | 1 | 0 | 0 | 0 | 0 | 0 | 0 |
| <b>Novo Nordisk</b> | 0 | 0 | 1 | 0 | 1 | 0 | 0 | 0 | 0 | 0 | 0 | 0 | 0 | 0 | 0 | 0 | 1 | 0 | 0 |
| <b>Octapharma</b>   | 0 | 0 | 0 | 0 | 0 | 0 | 0 | 0 | 0 | 0 | 0 | 0 | 0 | 0 | 0 | 0 | 0 | 0 | 0 |
| <b>PTC</b>          | 0 | 0 | 0 | 0 | 0 | 0 | 1 | 0 | 0 | 0 | 0 | 0 | 0 | 0 | 0 | 0 | 0 | 0 | 0 |
| <b>Pfizer</b>       | 1 | 1 | 1 | 0 | 1 | 0 | 1 | 0 | 1 | 0 | 1 | 0 | 1 | 0 | 0 | 0 | 1 | 0 | 0 |
| <b>Pharmasure</b>   | 0 | 0 | 0 | 0 | 0 | 0 | 0 | 0 | 0 | 0 | 0 | 0 | 0 | 0 | 1 | 0 | 0 | 0 | 0 |

|                     |   |   |   |   |   |   |   |   |   |   |   |   |   |   |   |   |   |   |   |
|---------------------|---|---|---|---|---|---|---|---|---|---|---|---|---|---|---|---|---|---|---|
| <b>Pierre Fabre</b> | 0 | 1 | 0 | 0 | 0 | 0 | 0 | 0 | 0 | 0 | 0 | 0 | 1 | 0 | 0 | 0 | 0 | 0 | 0 |
| <b>Recordati</b>    | 0 | 0 | 0 | 0 | 1 | 0 | 0 | 0 | 0 | 0 | 0 | 0 | 0 | 0 | 0 | 0 | 0 | 0 | 0 |
| <b>Roche</b>        | 0 | 1 | 0 | 0 | 0 | 0 | 1 | 0 | 0 | 1 | 1 | 0 | 0 | 0 | 1 | 0 | 0 | 0 | 0 |
| <b>Rosemont</b>     | 0 | 0 | 0 | 0 | 0 | 0 | 0 | 0 | 0 | 0 | 0 | 0 | 0 | 0 | 0 | 0 | 0 | 0 | 0 |
| <b>Sandoz</b>       | 0 | 0 | 0 | 0 | 0 | 0 | 0 | 0 | 0 | 0 | 0 | 0 | 0 | 0 | 0 | 0 | 0 | 0 | 0 |
| <b>Sanofi</b>       | 1 | 1 | 1 | 1 | 1 | 0 | 1 | 0 | 1 | 0 | 0 | 1 | 1 | 1 | 0 | 0 | 0 | 0 | 0 |
| <b>Santen</b>       | 0 | 0 | 0 | 1 | 0 | 0 | 0 | 1 | 0 | 0 | 0 | 0 | 0 | 0 | 0 | 0 | 0 | 0 | 0 |
| <b>Seqirus</b>      | 0 | 0 | 0 | 0 | 0 | 0 | 0 | 0 | 0 | 0 | 0 | 0 | 0 | 0 | 0 | 0 | 0 | 0 | 0 |
| <b>Servier</b>      | 0 | 1 | 0 | 0 | 0 | 0 | 0 | 0 | 0 | 0 | 0 | 0 | 0 | 0 | 0 | 0 | 0 | 0 | 0 |
| <b>Shionogi</b>     | 0 | 0 | 0 | 0 | 0 | 0 | 0 | 0 | 0 | 0 | 0 | 0 | 0 | 0 | 0 | 0 | 0 | 0 | 0 |
| <b>Shire</b>        | 0 | 0 | 1 | 1 | 1 | 1 | 0 | 0 | 0 | 0 | 0 | 0 | 0 | 0 | 0 | 0 | 0 | 0 | 0 |
| <b>Sobi</b>         | 0 | 1 | 1 | 0 | 1 | 0 | 0 | 0 | 0 | 0 | 0 | 0 | 0 | 0 | 0 | 0 | 0 | 0 | 0 |
| <b>Takeda</b>       | 0 | 1 | 0 | 0 | 1 | 0 | 0 | 0 | 0 | 0 | 1 | 0 | 0 | 0 | 0 | 0 | 0 | 0 | 0 |
| <b>Teva</b>         | 0 | 0 | 0 | 0 | 0 | 0 | 0 | 0 | 0 | 0 | 0 | 0 | 0 | 0 | 0 | 0 | 0 | 0 | 0 |
| <b>Tillotts</b>     | 0 | 0 | 0 | 0 | 0 | 0 | 0 | 0 | 0 | 0 | 1 | 0 | 0 | 0 | 0 | 0 | 0 | 0 | 0 |
| <b>UCB</b>          | 0 | 0 | 1 | 0 | 0 | 0 | 1 | 0 | 0 | 0 | 0 | 1 | 1 | 0 | 0 | 0 | 0 | 0 | 0 |
| <b>Valneva</b>      | 1 | 0 | 0 | 0 | 0 | 0 | 0 | 0 | 0 | 0 | 0 | 0 | 0 | 0 | 0 | 0 | 0 | 0 | 0 |
| <b>Veriton</b>      | 0 | 0 | 0 | 0 | 0 | 0 | 0 | 0 | 0 | 0 | 0 | 0 | 0 | 0 | 0 | 0 | 0 | 0 | 0 |
| <b>Vifor</b>        | 0 | 0 | 0 | 0 | 0 | 0 | 0 | 0 | 0 | 0 | 0 | 0 | 0 | 0 | 0 | 0 | 0 | 0 | 0 |
| <b>Zogenix</b>      | 0 | 0 | 0 | 0 | 0 | 0 | 1 | 0 | 0 | 0 | 0 | 0 | 0 | 0 | 0 | 0 | 0 | 0 | 0 |

Notes: This table reflects whether companies had a definite or probable interest in the ICD-11 code based on their pipeline or portfolio (1 = yes, 0 = no). Please note that companies' interests were opportunistically screened only in disease areas where they made a payment to a specific patient organisation, and therefore this table should not be considered exhaustive. The table refers payments made in 2020 only.

Legend: 01 Certain infectious or parasitic diseases; 02 Neoplasms; 03 Diseases of the blood or blood-forming organs; 04 Diseases of the immune system; 05 Endocrine, nutritional or metabolic diseases; 06 Mental, behavioural or neurodevelopmental disorders; 08 Diseases of the nervous system; 09 Diseases of the visual system; 11 Diseases of the circulatory system; 12 Diseases of the respiratory system; 13 Diseases of the digestive system; 14 Diseases of the skin; 15 Diseases of the musculoskeletal system or connective tissue; 16 Diseases of the genitourinary system; 18 Pregnancy, childbirth or the puerperium; 19 Certain conditions originating in the perinatal period; 20 Developmental anomalies; 22 Injury, poisoning or certain other consequences of external causes; Other. Other indicates disease areas where patient organisations operate that could not be classified as any ICD-11 codes.

**Table 6. List of patient organisations receiving payments in 2020**

| Standardised name                          | Charity number | Link                                                                                                                                                                                                              |
|--------------------------------------------|----------------|-------------------------------------------------------------------------------------------------------------------------------------------------------------------------------------------------------------------|
| Acacia Mews Care Home                      | 1174346        | <a href="https://www.nhs.uk/services/Careproviders/Overview/DefaultView.aspx?id=47011">https://www.nhs.uk/services/Careproviders/Overview/DefaultView.aspx?id=47011</a>                                           |
| Action Bladder Cancer UK                   | 1164374        | <a href="https://actionbladdercanceruk.org/">https://actionbladdercanceruk.org/</a>                                                                                                                               |
| Action for Pulmonary Fibrosis              | 1152399        | <a href="https://www.actionpf.org/">https://www.actionpf.org/</a>                                                                                                                                                 |
| Action On Pre-Eclampsia                    | 1013557        | <a href="https://action-on-pre-eclampsia.org.uk/">https://action-on-pre-eclampsia.org.uk/</a>                                                                                                                     |
| Action on Smoking and Health - Wales       | 1120834        | <a href="https://ash.wales/">https://ash.wales/</a>                                                                                                                                                               |
| Action Duchenne                            | 1101971        | <a href="https://www.actionduchenne.org/">https://www.actionduchenne.org/</a>                                                                                                                                     |
| Adfam                                      | 1067428        | <a href="https://adfam.org.uk/">https://adfam.org.uk/</a>                                                                                                                                                         |
| Africa Advocacy Foundation                 | 1164778        | <a href="https://www.africadvocacy.org/">https://www.africadvocacy.org/</a>                                                                                                                                       |
| African-Caribbean Leukaemia Trust          | 1119516        | <a href="https://aclt.org/">https://aclt.org/</a>                                                                                                                                                                 |
| Age UK                                     | 1128267        | <a href="https://www.ageuk.org.uk/">https://www.ageuk.org.uk/</a>                                                                                                                                                 |
| Alex - The Leukodystrophy Charity          | 1106008        | <a href="https://www.alextlc.org/">https://www.alextlc.org/</a>                                                                                                                                                   |
| ALK Positive Lung Cancer                   | 1181171        | <a href="https://www.alkpositive.org.uk/">https://www.alkpositive.org.uk/</a>                                                                                                                                     |
| Alkaptonuria Society                       | 1101052        | <a href="https://akusociety.org/">https://akusociety.org/</a>                                                                                                                                                     |
| Allergy UK                                 | 1094231        | <a href="https://www.allergyuk.org/">https://www.allergyuk.org/</a>                                                                                                                                               |
| Alliance for Heart Failure                 | N/A            | <a href="https://allianceforheartfailure.org/">https://allianceforheartfailure.org/</a>                                                                                                                           |
| Alzheimer Scotland                         | SC022315       | <a href="https://www.alzscot.org/">https://www.alzscot.org/</a>                                                                                                                                                   |
| Alzheimer's Support                        | 1048314        | <a href="https://www.alzheimerswiltshire.org.uk/">https://www.alzheimerswiltshire.org.uk/</a>                                                                                                                     |
| Alzheimer's Research UK                    | 1077089        | <a href="https://www.alzheimersresearchuk.org/">https://www.alzheimersresearchuk.org/</a>                                                                                                                         |
| Alzheimer's Society                        | 296645         | <a href="https://www.alzheimers.org.uk/">https://www.alzheimers.org.uk/</a>                                                                                                                                       |
| Amyloidosis Patients Association           | 1183624        | <a href="https://register-of-charities.charitycommission.gov.uk/charity-details/?regid=1183624&amp;subid=0">https://register-of-charities.charitycommission.gov.uk/charity-details/?regid=1183624&amp;subid=0</a> |
| Anthony Nolan                              | 803716         | <a href="https://www.anthonynolan.org/">https://www.anthonynolan.org/</a>                                                                                                                                         |
| Anticoagulation UK                         | 1090250        | <a href="https://register-of-charities.charitycommission.gov.uk/charity-details/?regid=1090250&amp;subid=0">https://register-of-charities.charitycommission.gov.uk/charity-details/?regid=1090250&amp;subid=0</a> |
| AOFAC Foundation                           | 1162155        | <a href="https://aofacfoundation.org/">https://aofacfoundation.org/</a>                                                                                                                                           |
| Aplastic Anaemia Trust                     | 1107539        | <a href="https://www.theaat.org.uk/">https://www.theaat.org.uk/</a>                                                                                                                                               |
| APS Support UK                             | 1138116        | <a href="https://aps-support.org.uk/">https://aps-support.org.uk/</a>                                                                                                                                             |
| Arthritis and Musculoskeletal Alliance     | 1108851        | <a href="http://arma.uk.net/">http://arma.uk.net/</a>                                                                                                                                                             |
| Aspens                                     | 1171446        | <a href="https://www.aspens.org.uk/">https://www.aspens.org.uk/</a>                                                                                                                                               |
| Association for Glycogen Storage Disease   | 1132271        | <a href="https://agsd.org.uk/">https://agsd.org.uk/</a>                                                                                                                                                           |
| Asthma + Lung UK                           | 326730         | <a href="https://www.asthma.org.uk/">https://www.asthma.org.uk/</a>                                                                                                                                               |
| Astriid                                    | 1176645        | <a href="https://astriid.org/">https://astriid.org/</a>                                                                                                                                                           |
| Atrial Fibrillation Association            | 1122442        | Supporting children terminally ill                                                                                                                                                                                |
| Axial Spondylitis International Federation | 1173902        | <a href="https://asif.info/">https://asif.info/</a>                                                                                                                                                               |
| Baby Lifeline                              | 1006457        | <a href="https://www.babylifeline.org.uk/">https://www.babylifeline.org.uk/</a>                                                                                                                                   |
| Bath Institute for Rheumatic Diseases      | 1040650        | <a href="https://www.birdbath.org.uk/">https://www.birdbath.org.uk/</a>                                                                                                                                           |



|                                               |          |                                                                                                                       |
|-----------------------------------------------|----------|-----------------------------------------------------------------------------------------------------------------------|
| Batten Disease Family Association             | 1084908  | <a href="http://www.bdfa-uk.org.uk/">http://www.bdfa-uk.org.uk/</a>                                                   |
| Bipolar UK                                    | 293340   | <a href="https://www.bipolaruk.org/">https://www.bipolaruk.org/</a>                                                   |
| Bladder Health UK                             | 1149973  | <a href="https://bladderhealthuk.org/">https://bladderhealthuk.org/</a>                                               |
| Bliss                                         | 1002973  | <a href="https://www.bliss.org.uk/">https://www.bliss.org.uk/</a>                                                     |
| Blood Cancer Alliance                         | N/A      | <a href="https://www.bloodcanceralliance.org/">https://www.bloodcanceralliance.org/</a>                               |
| Blood Cancer UK                               | 216032   | <a href="https://bloodcancer.org.uk/">https://bloodcancer.org.uk/</a>                                                 |
| BME Cancer Communities                        | 1182806  | <a href="https://www.bmecancer.com/">https://www.bmecancer.com/</a>                                                   |
| Bowel Cancer UK                               | 1071038  | <a href="https://www.bowelcanceruk.org.uk/">https://www.bowelcanceruk.org.uk/</a>                                     |
| Brains Trust                                  | 1114634  | <a href="https://brainstrust.org.uk/">https://brainstrust.org.uk/</a>                                                 |
| Breast Cancer Haven (The Haven)               | 3291851  | <a href="https://www.breastcancerhaven.org.uk/">https://www.breastcancerhaven.org.uk/</a>                             |
| Breast Cancer Now                             | 1160558  | <a href="https://breastcancer.org.uk/">https://breastcancer.org.uk/</a>                                               |
| British Association of the Study of the Liver | 1106320  | <a href="https://www.basl.org.uk/">https://www.basl.org.uk/</a>                                                       |
| British Heart Foundation                      | 225971   | <a href="https://www.bhf.org.uk/">https://www.bhf.org.uk/</a>                                                         |
| British Inherited Metabolic Disease Group     | 1184024  | <a href="https://www.bimdg.org.uk/site/index.asp">https://www.bimdg.org.uk/site/index.asp</a>                         |
| British Liver Trust                           | 298858   | <a href="https://britishlivertrust.org.uk/">https://britishlivertrust.org.uk/</a>                                     |
| British Paediatric Neurology Association      | 1159115  | <a href="https://bpna.org.uk/">https://bpna.org.uk/</a>                                                               |
| British Porphyria Association                 | 1089609  | <a href="http://porphyria.org.uk/">http://porphyria.org.uk/</a>                                                       |
| British Skin Foundation                       | 1171373  | <a href="https://www.britishskinfoundation.org.uk/">https://www.britishskinfoundation.org.uk/</a>                     |
| British Society for Heart Failure             | 1075720  | <a href="https://www.bsh.org.uk/">https://www.bsh.org.uk/</a>                                                         |
| British Society of Echocardiography           | 1093808  | <a href="https://www.bsecho.org/">https://www.bsecho.org/</a>                                                         |
| British Thyroid Foundation                    | 1006391  | <a href="https://www.btf-thyroid.org/">https://www.btf-thyroid.org/</a>                                               |
| Cambridge Rare Disease Network                | 1166365  | <a href="https://www.camraredisease.org/">https://www.camraredisease.org/</a>                                         |
| Cancer 52                                     | 7994413  | <a href="https://www.cancer52.org.uk/">https://www.cancer52.org.uk/</a>                                               |
| Cancer Black Care                             | 1086465  | <a href="https://www.cancerblackcare.org.uk/">https://www.cancerblackcare.org.uk/</a>                                 |
| Cancer Focus Northern Ireland                 | 101307   | <a href="https://cancerfocusni.org/">https://cancerfocusni.org/</a>                                                   |
| Cancer Research UK                            | 1089464  | <a href="https://www.cancerresearchuk.org/">https://www.cancerresearchuk.org/</a>                                     |
| Cancer Support Scotland                       | SC012867 | <a href="https://www.cancersupportscotland.org/">https://www.cancersupportscotland.org/</a>                           |
| Cancer Support UK                             | 1105703  | <a href="https://cancersupportuk.org/">https://cancersupportuk.org/</a>                                               |
| CancerCare                                    | 1120048  | <a href="https://cancercare.org.uk/">https://cancercare.org.uk/</a>                                                   |
| Cara Trust                                    | 328124   | <a href="https://www.madtrust.org.uk/project/the-cara-trust/">https://www.madtrust.org.uk/project/the-cara-trust/</a> |
| Cardiomyopathy UK                             | 1164263  | <a href="https://www.cardiomyopathy.org/">https://www.cardiomyopathy.org/</a>                                         |
| Carers UK                                     | N/A      | <a href="https://www.carersuk.org/">https://www.carersuk.org/</a>                                                     |
| Changing Faces                                | 1011222  | <a href="https://www.changingfaces.org.uk/">https://www.changingfaces.org.uk/</a>                                     |
| Child Growth Foundation                       | 1172807  | <a href="https://childgrowthfoundation.org/">https://childgrowthfoundation.org/</a>                                   |
| Childhood Trust                               | 1154032  | <a href="https://www.childhoodtrust.org.uk/">https://www.childhoodtrust.org.uk/</a>                                   |
| Children's Cancer and Leukaemia Group         | 1182637  | <a href="https://www.cclg.org.uk/">https://www.cclg.org.uk/</a>                                                       |
| Children's HIV Association                    | 1122356  | <a href="https://www.chiva.org.uk/">https://www.chiva.org.uk/</a>                                                     |
| Children's Trust                              | 288018   | <a href="https://www.thechildrenstrust.org.uk/">https://www.thechildrenstrust.org.uk/</a>                             |
| Children's Burns Trust                        | 1082084  | <a href="https://www.cbtrust.org.uk/">https://www.cbtrust.org.uk/</a>                                                 |

|                                                   |          |                                                                                                                                                                                                                                                                             |
|---------------------------------------------------|----------|-----------------------------------------------------------------------------------------------------------------------------------------------------------------------------------------------------------------------------------------------------------------------------|
| Cholangiocarcinoma Charity                        | 1091915  | <a href="https://ammf.org.uk/">https://ammf.org.uk/</a>                                                                                                                                                                                                                     |
| Chronic Lymphocytic Leukaemia Support Association | 1178482  | <a href="https://www.cllsupport.org.uk/">https://www.cllsupport.org.uk/</a>                                                                                                                                                                                                 |
| Coalition for Life-Course Immunisation            | 1182662  | <a href="https://www.cl-ci.org/">https://www.cl-ci.org/</a>                                                                                                                                                                                                                 |
| Confederation of Meningitis Organisations         | 1091105  | <a href="https://www.comeningitis.org/">https://www.comeningitis.org/</a>                                                                                                                                                                                                   |
| Contact a Family                                  | 284912   | <a href="https://contact.org.uk/">https://contact.org.uk/</a>                                                                                                                                                                                                               |
| Crohn's and Colitis UK                            | 1117148  | <a href="https://www.crohnsandcolitis.org.uk/">https://www.crohnsandcolitis.org.uk/</a>                                                                                                                                                                                     |
| Cystic Fibrosis Trust                             | 1079049  | <a href="https://www.cysticfibrosis.org.uk/">https://www.cysticfibrosis.org.uk/</a>                                                                                                                                                                                         |
| Dementia UK                                       | 1039404  | <a href="https://www.dementiauk.org/">https://www.dementiauk.org/</a>                                                                                                                                                                                                       |
| Dementia Club UK                                  | 1168397  | <a href="https://dementioclubuk.org.uk/">https://dementioclubuk.org.uk/</a>                                                                                                                                                                                                 |
| Diabetes UK                                       | 215199   | <a href="https://www.diabetes.org.uk/">https://www.diabetes.org.uk/</a>                                                                                                                                                                                                     |
| Diana Award                                       | 1117288  | <a href="https://diana-award.org.uk/">https://diana-award.org.uk/</a>                                                                                                                                                                                                       |
| DMD Pathfinders                                   | 1155884  | <a href="https://www.pathfindersalliance.org.uk/">https://www.pathfindersalliance.org.uk/</a>                                                                                                                                                                               |
| Down Syndrome International                       | 1091843  | <a href="https://www.ds-int.org/">https://www.ds-int.org/</a>                                                                                                                                                                                                               |
| Downs Syndrome Association                        | 1061474  | <a href="https://www.downs-syndrome.org.uk/">https://www.downs-syndrome.org.uk/</a>                                                                                                                                                                                         |
| Dravet Syndrome UK                                | 1128289  | <a href="https://www.dravet.org.uk/">https://www.dravet.org.uk/</a>                                                                                                                                                                                                         |
| DrugFAM                                           | 1123316  | <a href="https://www.drugfam.co.uk/#">https://www.drugfam.co.uk/#</a>                                                                                                                                                                                                       |
| Duchenne UK                                       | 1147094  | <a href="https://www.duchenneuk.org/">https://www.duchenneuk.org/</a>                                                                                                                                                                                                       |
| Dystonia UK                                       | 1062595  | <a href="https://www.dystonia.org.uk/">https://www.dystonia.org.uk/</a>                                                                                                                                                                                                     |
| East North Hertfordshire NHS Trust                | 1053338  | <a href="https://www.enherts-tr.nhs.uk/">https://www.enherts-tr.nhs.uk/</a>                                                                                                                                                                                                 |
| East Sussex Healthcare NHS Trust                  | 1058599  | <a href="https://www.esht.nhs.uk/">https://www.esht.nhs.uk/</a>                                                                                                                                                                                                             |
| Ecancer                                           | 1176307  | <a href="https://ecancer.org/en/">https://ecancer.org/en/</a>                                                                                                                                                                                                               |
| Eczema Outreach Support                           | SC042392 | <a href="https://www.eos.org.uk/">https://www.eos.org.uk/</a>                                                                                                                                                                                                               |
| Encephalitis Society                              | 1087843  | <a href="https://www.encephalitis.info/">https://www.encephalitis.info/</a>                                                                                                                                                                                                 |
| Epilepsy Action                                   | 234343   | <a href="https://www.epilepsy.org.uk/?gclid=CjwKCAiAsNKQBhAPEiwAB-I5zXsMWEMg1x_J-blYzK3HQGZujp-zoejjkEA_sYpKqYxct5LuE_sV6hoC1t8QAvD_BwE">https://www.epilepsy.org.uk/?gclid=CjwKCAiAsNKQBhAPEiwAB-I5zXsMWEMg1x_J-blYzK3HQGZujp-zoejjkEA_sYpKqYxct5LuE_sV6hoC1t8QAvD_BwE</a> |
| Epilepsy Consortium Scotland                      | N/A      | <a href="http://www.epilepsyconsortiumscotland.co.uk/">http://www.epilepsyconsortiumscotland.co.uk/</a>                                                                                                                                                                     |
| Epilepsy Research UK                              | 1100394  | <a href="https://epilepsyresearch.org.uk/">https://epilepsyresearch.org.uk/</a>                                                                                                                                                                                             |
| Epilepsy Scotland                                 | SC000067 | <a href="https://www.epilepsyscotland.org.uk/">https://www.epilepsyscotland.org.uk/</a>                                                                                                                                                                                     |
| Epilepsy Society                                  | 206186   | <a href="https://epilepsysociety.org.uk/">https://epilepsysociety.org.uk/</a>                                                                                                                                                                                               |
| Errol Mckellar Foundation                         | 1181574  | <a href="https://www.theerrolmckellarfoundation.com/">https://www.theerrolmckellarfoundation.com/</a>                                                                                                                                                                       |
| European Parkinson's Disease Association          | 1163211  | <a href="https://www.epda.eu.com/">https://www.epda.eu.com/</a>                                                                                                                                                                                                             |
| Eve Appeal                                        | 1091708  | <a href="https://eveappeal.org.uk/">https://eveappeal.org.uk/</a>                                                                                                                                                                                                           |
| Familial Hypercholesterolaemia Network            | 1170731  | <a href="https://fheurope.org/">https://fheurope.org/</a>                                                                                                                                                                                                                   |
| FareShare                                         | 1100051  | <a href="https://fareshare.org.uk/">https://fareshare.org.uk/</a>                                                                                                                                                                                                           |
| Favor UK                                          | N/A      | <a href="https://www.facesandvoicesofrecoveryuk.org/">https://www.facesandvoicesofrecoveryuk.org/</a>                                                                                                                                                                       |

|    |                                                   |          |                                                                                                                                                         |
|----|---------------------------------------------------|----------|---------------------------------------------------------------------------------------------------------------------------------------------------------|
| 1  | Fertility Network UK                              | 1099960  | <a href="https://fertilitynetworkuk.org/">https://fertilitynetworkuk.org/</a>                                                                           |
| 2  | Fight Bladder Cancer                              | 1157763  | <a href="https://www.fightbladdercancer.co.uk/">https://www.fightbladdercancer.co.uk/</a>                                                               |
| 3  | Fight for Sight UK                                | 1111438  | <a href="https://www.fightforsight.org.uk/">https://www.fightforsight.org.uk/</a>                                                                       |
| 4  | Findacure                                         | 1149646  | <a href="https://www.rarebeacon.org/about-us/our-journey/">https://www.rarebeacon.org/about-us/our-journey/</a>                                         |
| 5  | Gauchers Association                              | 1095657  | <a href="https://www.gaucher.org.uk/">https://www.gaucher.org.uk/</a>                                                                                   |
| 6  | Gene People                                       | 1141583  | <a href="https://genepeople.org.uk/">https://genepeople.org.uk/</a>                                                                                     |
| 7  | Genetic Alliance UK                               | 1114195  | <a href="https://geneticalliance.org.uk/">https://geneticalliance.org.uk/</a>                                                                           |
| 8  | GetYourBellyOut                                   | 11276246 | <a href="https://getyourbellyout.org.uk/">https://getyourbellyout.org.uk/</a>                                                                           |
| 9  | GIST Cancer UK                                    | 1129219  | <a href="https://www.gistcancer.org.uk/">https://www.gistcancer.org.uk/</a>                                                                             |
| 10 | Global Action on Men's Health                     | 1183428  | <a href="https://gamh.org/">https://gamh.org/</a>                                                                                                       |
| 11 | GO Girls                                          | 1179108  | <a href="https://www.gogirlssupport.org/">https://www.gogirlssupport.org/</a>                                                                           |
| 12 | Gorlin Syndrome Group                             | 1197282  | <a href="https://gorlingroup.org/">https://gorlingroup.org/</a>                                                                                         |
| 13 | Guts UK                                           | 1137029  | <a href="https://gutscharity.org.uk/">https://gutscharity.org.uk/</a>                                                                                   |
| 14 | Haemochromatosis UK                               | 1001307  | <a href="https://www.haemochromatosis.org.uk/">https://www.haemochromatosis.org.uk/</a>                                                                 |
| 15 | Haemophilia Scotland                              | SC044298 | <a href="https://haemophilia.scot/">https://haemophilia.scot/</a>                                                                                       |
| 16 | Haemophilia Society                               | 288260   | <a href="https://haemophilia.org.uk/">https://haemophilia.org.uk/</a>                                                                                   |
| 17 | Headway East London                               | 1083910  | <a href="https://headwayeastlondon.org/">https://headwayeastlondon.org/</a>                                                                             |
| 18 | Heart UK                                          | 1003904  | <a href="https://www.heartuk.org.uk/">https://www.heartuk.org.uk/</a>                                                                                   |
| 19 | Heartburn Cancer UK                               | 1136413  | <a href="https://www.heartburncanceruk.org/">https://www.heartburncanceruk.org/</a>                                                                     |
| 20 | Helen & Douglas House                             | 1085951  | <a href="https://www.helenanddouglas.org.uk/">https://www.helenanddouglas.org.uk/</a>                                                                   |
| 21 | Hepatitis C Coalition                             | N/A      | <a href="http://www.hepc-coalition.uk/">http://www.hepc-coalition.uk/</a>                                                                               |
| 22 | Hepatitis C Trust                                 | 1104279  | <a href="http://hepctrust.org.uk/">http://hepctrust.org.uk/</a>                                                                                         |
| 23 | Hereditary Angioedema UK                          | 1152591  | <a href="https://www.haeuk.org/">https://www.haeuk.org/</a>                                                                                             |
| 24 | Hidradenitis Suppurativa Trust                    | 1177819  | <a href="https://painuk.org/members/charities/hidradenitis-suppurativa-trust/">https://painuk.org/members/charities/hidradenitis-suppurativa-trust/</a> |
| 25 | Histiocytosis UK                                  | 1158789  | <a href="https://www.histiouk.org/">https://www.histiouk.org/</a>                                                                                       |
| 26 | HIV i-Base                                        | 1081905  | <a href="https://i-base.info/">https://i-base.info/</a>                                                                                                 |
| 27 | HIV Scotland                                      | SC033951 | <a href="https://www.hiv.scot/">https://www.hiv.scot/</a>                                                                                               |
| 28 | Human Story Theatre                               | 1173504  | <a href="https://humanstorytheatre.com/about-us/">https://humanstorytheatre.com/about-us/</a>                                                           |
| 29 | Huntington's Disease Association                  | 296453   | <a href="https://www.hda.org.uk/">https://www.hda.org.uk/</a>                                                                                           |
| 30 | Huntington's Disease Youth Organization           | 1145781  | <a href="https://en.hdyo.org/">https://en.hdyo.org/</a>                                                                                                 |
| 31 | Immune Deficiency Patient Group of Wales          | N/A      | <a href="https://www.facebook.com/tommy.browne.idpgw/">https://www.facebook.com/tommy.browne.idpgw/</a>                                                 |
| 32 | Immune Thrombocytopenia Support Association       | 1064480  | <a href="https://www.itpsupport.org.uk/index.php/en/">https://www.itpsupport.org.uk/index.php/en/</a>                                                   |
| 33 | Independent Cancer Patients' Voice                | 1138456  | <a href="http://www.independentcancerpatientsvoice.org.uk/">http://www.independentcancerpatientsvoice.org.uk/</a>                                       |
| 34 | Intensive Care Society                            | 1039236  | <a href="https://www.ics.ac.uk/">https://www.ics.ac.uk/</a>                                                                                             |
| 35 | International Alliance of Patients' Organizations | 1155577  | <a href="https://www.iapo.org.uk/">https://www.iapo.org.uk/</a>                                                                                         |
| 36 | International Brain Tumour Alliance               | N/A      | <a href="https://theibta.org/">https://theibta.org/</a>                                                                                                 |
| 37 | International Gaucher Alliance                    | 6653373  | <a href="https://gaucheralliance.org/home">https://gaucheralliance.org/home</a>                                                                         |
| 38 | International Headache Society                    | 1042574  | <a href="https://ihs-headache.org/en/">https://ihs-headache.org/en/</a>                                                                                 |
| 39 | International Longevity Centre UK                 | 1080496  | <a href="https://ilcuk.org.uk/">https://ilcuk.org.uk/</a>                                                                                               |

|                                                                   |          |                                                                                               |
|-------------------------------------------------------------------|----------|-----------------------------------------------------------------------------------------------|
| International Niemann-Pick Disease Alliance                       | 1150256  | <a href="https://www.inpda.org/">https://www.inpda.org/</a>                                   |
| International Patient Organisation for Primary Immunodeficiencies | 1058005  | <a href="https://ipopi.org/">https://ipopi.org/</a>                                           |
| Invisible Cafe                                                    | N/A      | <a href="https://theinvisiblecafe.co.uk/">https://theinvisiblecafe.co.uk/</a>                 |
| Isabel Hospice Limited                                            | 1046826  | <a href="https://www.isabelhospice.org.uk/">https://www.isabelhospice.org.uk/</a>             |
| Jo's Cervical Cancer Trust                                        | 1133542  | <a href="https://www.jostrust.org.uk/">https://www.jostrust.org.uk/</a>                       |
| Juvenile Diabetes Research Foundation                             | 295716   | <a href="https://jdrf.org.uk/">https://jdrf.org.uk/</a>                                       |
| Karen Clifford Skcin cancer charity                               | 1150048  | <a href="https://www.skcin.org/">https://www.skcin.org/</a>                                   |
| Kent Autistic Trust                                               | 801965   | <a href="https://www.kentautistictrust.org/">https://www.kentautistictrust.org/</a>           |
| Kent MS Therapy Centre                                            | 801382   | <a href="https://kentmstc.org.uk/">https://kentmstc.org.uk/</a>                               |
| Kidney Cancer Support Network                                     | 1164238  | <a href="https://actionkidneycancer.org/">https://actionkidneycancer.org/</a>                 |
| Kidney Cancer UK                                                  | 1120146  | <a href="https://www.kcuk.org.uk/">https://www.kcuk.org.uk/</a>                               |
| Kidney Care UK                                                    | 270288   | <a href="https://www.kidneycareuk.org/">https://www.kidneycareuk.org/</a>                     |
| Kidney Research UK                                                | 252892   | <a href="https://www.kidneyresearchuk.org/">https://www.kidneyresearchuk.org/</a>             |
| Leukaemia CARE                                                    | 1183890  | <a href="https://www.leukaemiacare.org.uk/">https://www.leukaemiacare.org.uk/</a>             |
| Leukaemia UK                                                      | 1154856  | <a href="https://www.leukaemiauk.org.uk/">https://www.leukaemiauk.org.uk/</a>                 |
| Liver4Life                                                        | 1152618  | <a href="https://www.liver4life.org.uk/">https://www.liver4life.org.uk/</a>                   |
| Lupus UK                                                          | 1051610  | <a href="https://www.lupusuk.org.uk/">https://www.lupusuk.org.uk/</a>                         |
| Lymphoma Action                                                   | 1068395  | <a href="https://lymphoma-action.org.uk/about-us">https://lymphoma-action.org.uk/about-us</a> |
| Macmillan Cancer Support                                          | 261017   | <a href="https://www.macmillan.org.uk/">https://www.macmillan.org.uk/</a>                     |
| Macular Society                                                   | 2177039  | <a href="https://www.macularsociety.org/">https://www.macularsociety.org/</a>                 |
| Maggie's Centres                                                  | SC024414 | <a href="https://www.maggies.org/">https://www.maggies.org/</a>                               |
| Maypole Project                                                   | 1120163  | <a href="https://www.themaypoleproject.co.uk/">https://www.themaypoleproject.co.uk/</a>       |
| MDS UK Support Group                                              | 1145214  | <a href="https://mdspatientsupport.org.uk/">https://mdspatientsupport.org.uk/</a>             |
| Meath Epilepsy Charity                                            | 200359   | <a href="https://www.meath.org.uk/">https://www.meath.org.uk/</a>                             |
| Medics 4 Rare Diseases                                            | 1183996  | <a href="https://www.m4rd.org/history/">https://www.m4rd.org/history/</a>                     |
| Melanoma Focus                                                    | 1124716  | <a href="https://melanomafocus.org/">https://melanomafocus.org/</a>                           |
| Melanoma Fund                                                     | 1085969  | <a href="https://www.melanoma-fund.co.uk/">https://www.melanoma-fund.co.uk/</a>               |
| Melanoma UK                                                       | 1157635  | <a href="https://www.melanomauk.org.uk/">https://www.melanomauk.org.uk/</a>                   |
| Memorylane Eastbourne                                             | 1163541  | <a href="https://www.memorylaneeastbourne.co.uk/">https://www.memorylaneeastbourne.co.uk/</a> |
| Meningitis Now                                                    | 803016   | <a href="https://www.meningitisnow.org/">https://www.meningitisnow.org/</a>                   |
| Meningitis Research Foundation                                    | 1091105  | <a href="https://www.meningitis.org/">https://www.meningitis.org/</a>                         |
| Menopause Support                                                 | N/A      | <a href="https://menopausesupport.co.uk/">https://menopausesupport.co.uk/</a>                 |
| Mental Health UK                                                  | 1170815  | <a href="https://mentalhealth-uk.org/">https://mentalhealth-uk.org/</a>                       |
| Mersey Region Epilepsy Association                                | 504366   | <a href="https://www.epilepsymersey.org.uk/">https://www.epilepsymersey.org.uk/</a>           |
| Mesothelioma UK                                                   | 1177039  | <a href="https://www.mesothelioma.uk.com/">https://www.mesothelioma.uk.com/</a>               |
| Metabolic Support UK                                              | 1089588  | <a href="https://www.metabolicsupportuk.org/">https://www.metabolicsupportuk.org/</a>         |
| Migraine Trust                                                    | 1081300  | <a href="https://migrainetrust.org/">https://migrainetrust.org/</a>                           |
| Motor Neurone Disease Association                                 | 294354   | <a href="https://www.mndassociation.org/">https://www.mndassociation.org/</a>                 |
| Mouth Cancer Foundation                                           | 1109298  | <a href="https://www.mouthcancerfoundation.org/">https://www.mouthcancerfoundation.org/</a>   |
| MPN Voice                                                         | 1160316  | <a href="https://www.mpnvoice.org.uk/">https://www.mpnvoice.org.uk/</a>                       |

|                                                                     |          |                                                                                                                                                                                                                                                                                               |
|---------------------------------------------------------------------|----------|-----------------------------------------------------------------------------------------------------------------------------------------------------------------------------------------------------------------------------------------------------------------------------------------------|
| Multiple Sclerosis International Federation                         | 1105321  | <a href="https://www.msif.org/">https://www.msif.org/</a>                                                                                                                                                                                                                                     |
| Multiple Sclerosis Society UK                                       | 1139257  | <a href="https://www.mssociety.org.uk/">https://www.mssociety.org.uk/</a>                                                                                                                                                                                                                     |
| Multiple Sclerosis Therapy Centres                                  | 1031690  | <a href="https://www.msntc.org.uk/">https://www.msntc.org.uk/</a>                                                                                                                                                                                                                             |
| Multiple Sclerosis Trust                                            | 1088353  | <a href="https://mstrust.org.uk/">https://mstrust.org.uk/</a>                                                                                                                                                                                                                                 |
| Muscular Dystrophy UK                                               | 205395   | <a href="https://www.musculardystrophyuk.org/">https://www.musculardystrophyuk.org/</a>                                                                                                                                                                                                       |
| My Name'5 Doddie Foundation                                         | SC047871 | <a href="https://www.myname5doddie.co.uk/">https://www.myname5doddie.co.uk/</a>                                                                                                                                                                                                               |
| Myeloma UK                                                          | SC026116 | <a href="https://www.myeloma.org.uk/">https://www.myeloma.org.uk/</a>                                                                                                                                                                                                                         |
| National AIDS Map                                                   | 1011220  | <a href="https://www.aidsmap.com/">https://www.aidsmap.com/</a>                                                                                                                                                                                                                               |
| National AIDS Trust                                                 | 297977   | <a href="https://www.nat.org.uk/">https://www.nat.org.uk/</a>                                                                                                                                                                                                                                 |
| National Attention Deficit Disorder Information and Support Service | N/A      | <a href="https://www.nhs.uk/services/service-directory/the-national-attention-deficit-disorder-information-and-support-service-address/N10498901">https://www.nhs.uk/services/service-directory/the-national-attention-deficit-disorder-information-and-support-service-address/N10498901</a> |
| National Axial Spondyloarthritis Society                            | 1183175  | <a href="https://nass.co.uk/">https://nass.co.uk/</a>                                                                                                                                                                                                                                         |
| National Cancer Research Institute                                  | 1160609  | <a href="https://www.ncri.org.uk/">https://www.ncri.org.uk/</a>                                                                                                                                                                                                                               |
| National Eczema Society                                             | 1009671  | <a href="https://eczema.org/">https://eczema.org/</a>                                                                                                                                                                                                                                         |
| National Federation of Prostate Cancer Support Groups               | 1163152  | <a href="https://tackleprostate.org/">https://tackleprostate.org/</a>                                                                                                                                                                                                                         |
| National Kidney Federation                                          | 1106735  | <a href="https://www.kidney.org.uk/">https://www.kidney.org.uk/</a>                                                                                                                                                                                                                           |
| National Rheumatoid Arthritis Society                               | 1134859  | <a href="https://nras.org.uk/">https://nras.org.uk/</a>                                                                                                                                                                                                                                       |
| National Voices                                                     | 1057711  | <a href="https://www.nationalvoices.org.uk/">https://www.nationalvoices.org.uk/</a>                                                                                                                                                                                                           |
| NAZ                                                                 | 1014056  | <a href="https://www.naz.org.uk/">https://www.naz.org.uk/</a>                                                                                                                                                                                                                                 |
| Neuroendocrine Cancer UK                                            | 1092386  | <a href="https://www.neuroendocrinecancer.org.uk/">https://www.neuroendocrinecancer.org.uk/</a>                                                                                                                                                                                               |
| Neurological Alliance                                               | 1039034  | <a href="https://www.neural.org.uk/">https://www.neural.org.uk/</a>                                                                                                                                                                                                                           |
| New Life Counselling                                                | NI005568 | <a href="https://www.amh.org.uk/">https://www.amh.org.uk/</a>                                                                                                                                                                                                                                 |
| NHS Charities Together                                              | 1186569  | <a href="https://nhscharitiestogether.co.uk/">https://nhscharitiestogether.co.uk/</a>                                                                                                                                                                                                         |
| Nicole & Jessica Rich Foundation                                    | N/A      | <a href="https://thenicolerichfoundation.org.uk/">https://thenicolerichfoundation.org.uk/</a>                                                                                                                                                                                                 |
| Niemann-Pick UK                                                     | 1144406  | <a href="https://www.npuk.org/">https://www.npuk.org/</a>                                                                                                                                                                                                                                     |
| North Bristol NHS Trust                                             | 1055900  | <a href="https://www.nbt.nhs.uk/">https://www.nbt.nhs.uk/</a>                                                                                                                                                                                                                                 |
| Oral Health Foundation                                              | 263198   | <a href="https://www.dentalhealth.org/">https://www.dentalhealth.org/</a>                                                                                                                                                                                                                     |
| Orchid                                                              | 1080540  | <a href="https://orchid-cancer.org.uk/">https://orchid-cancer.org.uk/</a>                                                                                                                                                                                                                     |
| Osteoporosis Dorset                                                 | 1023507  | <a href="https://www.osteodorset.org.uk/">https://www.osteodorset.org.uk/</a>                                                                                                                                                                                                                 |
| Ovacome                                                             | 1159682  | <a href="https://www.ovacome.org.uk/">https://www.ovacome.org.uk/</a>                                                                                                                                                                                                                         |
| Ovarian Cancer Action                                               | 1109743  | <a href="https://ovarian.org.uk/">https://ovarian.org.uk/</a>                                                                                                                                                                                                                                 |
| Over the Wall                                                       | 1075361  | <a href="https://www.otw.org.uk/">https://www.otw.org.uk/</a>                                                                                                                                                                                                                                 |
| Pain Concern                                                        | SC023559 | <a href="https://painconcern.org.uk/">https://painconcern.org.uk/</a>                                                                                                                                                                                                                         |
| Pancreatic Cancer Action                                            | 1137689  | <a href="https://pancreaticcanceraction.org/">https://pancreaticcanceraction.org/</a>                                                                                                                                                                                                         |
| Pancreatic Cancer UK                                                | 1112708  | <a href="https://www.pancreaticcancer.org.uk/">https://www.pancreaticcancer.org.uk/</a>                                                                                                                                                                                                       |
| Parathyroid UK                                                      | N/A      | <a href="https://parathyroiduk.org/">https://parathyroiduk.org/</a>                                                                                                                                                                                                                           |
| Parkinson's UK                                                      | 258197   | <a href="https://www.parkinsons.org.uk/">https://www.parkinsons.org.uk/</a>                                                                                                                                                                                                                   |
| Patient Information Forum                                           | N/A      | <a href="https://pifonline.org.uk/">https://pifonline.org.uk/</a>                                                                                                                                                                                                                             |
| Patients Association                                                | 1006733  | <a href="https://www.patients-association.org.uk/">https://www.patients-association.org.uk/</a>                                                                                                                                                                                               |

|                                                                           |          |                                                                                                                                                     |
|---------------------------------------------------------------------------|----------|-----------------------------------------------------------------------------------------------------------------------------------------------------|
| Patients On Intravenous and Nasogastric Nutrition Therapy                 | 1157655  | <a href="https://pinnt.com/Home.aspx">https://pinnt.com/Home.aspx</a>                                                                               |
| Paula Carr Diabetes Trust                                                 | 801596   | <a href="https://www.paulacarrdiabetestrust.co.uk/">https://www.paulacarrdiabetestrust.co.uk/</a>                                                   |
| PBC Foundation UK                                                         | SC025619 | <a href="https://www.pbcfoundation.org.uk/">https://www.pbcfoundation.org.uk/</a>                                                                   |
| Pilgrims Hospice                                                          | 293968   | <a href="https://www.pilgrimshospices.org/">https://www.pilgrimshospices.org/</a>                                                                   |
| Pituitary Foundation                                                      | 1058968  | <a href="https://www.pituitary.org.uk/">https://www.pituitary.org.uk/</a>                                                                           |
| Platelet Society                                                          | 1172202  | <a href="https://plateletsociety.co.uk/">https://plateletsociety.co.uk/</a>                                                                         |
| Police Community Clubs of Great Britain                                   | N/A      | <a href="https://www.policecommunityclubs.org/">https://www.policecommunityclubs.org/</a>                                                           |
| Polycystic Kidney Disease Charity                                         | 1160970  | <a href="https://pkdcharity.org.uk/">https://pkdcharity.org.uk/</a>                                                                                 |
| Pompe Support Network                                                     | 1186383  | <a href="https://pompe.uk/">https://pompe.uk/</a>                                                                                                   |
| Positively UK                                                             | 1007685  | <a href="https://positivelyuk.org/">https://positivelyuk.org/</a>                                                                                   |
| Primary Immunodeficiency UK                                               | 1193166  | <a href="http://www.immunodeficiencyuk.org/">http://www.immunodeficiencyuk.org/</a>                                                                 |
| Progress Educational Trust                                                | 1139856  | <a href="https://www.progress.org.uk/">https://www.progress.org.uk/</a>                                                                             |
| Progressive Supranuclear Palsy Association                                | 1037087  | <a href="https://pspassociation.org.uk/">https://pspassociation.org.uk/</a>                                                                         |
| Prostate Cancer UK                                                        | 1005541  | <a href="https://prostatecanceruk.org/">https://prostatecanceruk.org/</a>                                                                           |
| Psoriasis Association                                                     | 1180666  | <a href="https://www.psoriasis-association.org.uk/">https://www.psoriasis-association.org.uk/</a>                                                   |
| Pulmonary Hypertension Association UK                                     | 1120756  | <a href="https://www.phauk.org/">https://www.phauk.org/</a>                                                                                         |
| Pumping Marvellous Foundation                                             | 1151848  | <a href="https://www.pumpingmarvellous.org/">https://www.pumpingmarvellous.org/</a>                                                                 |
| Rain Trust                                                                | N/A      | <a href="https://www.nhs.uk/services/service-directory/rain-trust/N10972097">https://www.nhs.uk/services/service-directory/rain-trust/N10972097</a> |
| Rainbow Trust Children's Charity                                          | 1070532  | <a href="https://www.rainbowtrust.org.uk/">https://www.rainbowtrust.org.uk/</a>                                                                     |
| Rapid Effective Assistance For Children With Potentially Terminal Illness | 802440   | <a href="https://reactcharity.org/">https://reactcharity.org/</a>                                                                                   |
| Red Rose Recovery                                                         | 1152474  | <a href="https://redroserecovery.org.uk/">https://redroserecovery.org.uk/</a>                                                                       |
| Release                                                                   | 801118   | <a href="https://www.release.org.uk/">https://www.release.org.uk/</a>                                                                               |
| Rethink Mental Illness                                                    | 271028   | <a href="https://www.rethink.org/">https://www.rethink.org/</a>                                                                                     |
| Retina UK                                                                 | 1153851  | <a href="https://retinauk.org.uk/about/">https://retinauk.org.uk/about/</a>                                                                         |
| Revive Multiple Sclerosis Support                                         | SC022886 | <a href="https://www.revivemssupport.org.uk/">https://www.revivemssupport.org.uk/</a>                                                               |
| Roy Castle Lung Cancer Foundation                                         | 1046854  | <a href="https://roycastle.org/">https://roycastle.org/</a>                                                                                         |
| Royal Free Charity                                                        | 1165672  | <a href="https://royalfreecharity.org/">https://royalfreecharity.org/</a>                                                                           |
| Royal National Institute of Blind People                                  | 226227   | <a href="https://www.rnib.org.uk/">https://www.rnib.org.uk/</a>                                                                                     |
| Royal Osteoporosis Society                                                | 1102712  | <a href="https://theros.org.uk/">https://theros.org.uk/</a>                                                                                         |
| Ruth Strauss Foundation                                                   | 1183221  | <a href="https://ruthstraussfoundation.com/">https://ruthstraussfoundation.com/</a>                                                                 |
| Salivary Gland Cancer UK                                                  | 1182762  | <a href="https://www.salivaryglandcancer.uk/">https://www.salivaryglandcancer.uk/</a>                                                               |
| SANE                                                                      | 296572   | <a href="https://www.sane.org.uk/">https://www.sane.org.uk/</a>                                                                                     |
| Sarcoma UK                                                                | 1139869  | <a href="https://sarcoma.org.uk/">https://sarcoma.org.uk/</a>                                                                                       |
| Scleroderma and Raynauds UK                                               | 1161828  | <a href="https://www.sruk.co.uk/">https://www.sruk.co.uk/</a>                                                                                       |
| Scottish Drugs Forum                                                      | SC008075 | <a href="https://www.sdf.org.uk/">https://www.sdf.org.uk/</a>                                                                                       |

|    |                                                   |           |                                                                                                                                                                                                                                       |
|----|---------------------------------------------------|-----------|---------------------------------------------------------------------------------------------------------------------------------------------------------------------------------------------------------------------------------------|
| 1  | Scottish Families Affected by Alcohol & Drugs     | N/A       | <a href="https://www.sfad.org.uk/">https://www.sfad.org.uk/</a>                                                                                                                                                                       |
| 2  | Scottish Huntington's Association                 | SC010985  | <a href="https://hdscotland.org/">https://hdscotland.org/</a>                                                                                                                                                                         |
| 3  | Shift.MS                                          | 1117194   | <a href="https://shift.ms/">https://shift.ms/</a>                                                                                                                                                                                     |
| 4  | Shine Cancer Support                              | 1146902   | <a href="https://shinecancersupport.org/">https://shinecancersupport.org/</a>                                                                                                                                                         |
| 5  | Sickle Cell Society                               | 1046631   | <a href="https://www.sicklecellsociety.org/">https://www.sicklecellsociety.org/</a>                                                                                                                                                   |
| 6  | Skin Conditions Campaign Scotland                 | SC030004  | <a href="https://www.disabilityscot.org.uk/organisation/skin-conditions-campaign-scotland/">https://www.disabilityscot.org.uk/organisation/skin-conditions-campaign-scotland/</a>                                                     |
| 7  | Society for Mucopolysaccharide Diseases           | 1143472   | <a href="https://www.mpsociety.org.uk/">https://www.mpsociety.org.uk/</a>                                                                                                                                                             |
| 8  | Somerville Foundation                             | 1138088   | <a href="https://sfhearts.org.uk/">https://sfhearts.org.uk/</a>                                                                                                                                                                       |
| 9  | Sophia Forum                                      | 1131629   | <a href="https://sophiaforum.net/">https://sophiaforum.net/</a>                                                                                                                                                                       |
| 10 | Spinal Muscular Atrophy Support UK                | 1106815   | <a href="https://smauk.org.uk/">https://smauk.org.uk/</a>                                                                                                                                                                             |
| 11 | St Elizabeths Centre                              | 1176777   | <a href="https://www.stelizabeths.org.uk/">https://www.stelizabeths.org.uk/</a>                                                                                                                                                       |
| 12 | Stroke Association                                | 211015    | <a href="https://www.stroke.org.uk/">https://www.stroke.org.uk/</a>                                                                                                                                                                   |
| 13 | Swallows Head and Neck Cancer Charity             | 1149794   | <a href="https://www.theswallows.org.uk/">https://www.theswallows.org.uk/</a>                                                                                                                                                         |
| 14 | Target Ovarian Cancer                             | 1125038   | <a href="https://targetovariancancer.org.uk/">https://targetovariancancer.org.uk/</a>                                                                                                                                                 |
| 15 | Tenovus Cancer Care                               | 1054015   | <a href="https://www.tenovuscancercare.org.uk/">https://www.tenovuscancercare.org.uk/</a>                                                                                                                                             |
| 16 | Terrence Higgins Trust                            | 288527    | <a href="https://www.tht.org.uk/">https://www.tht.org.uk/</a>                                                                                                                                                                         |
| 17 | Thrombosis UK                                     | 1090540   | <a href="https://thrombosisuk.org/news/post.php?s=2021-10-11-thrombosis-uk-winner-of-activity-of-the-year-award-2021">https://thrombosisuk.org/news/post.php?s=2021-10-11-thrombosis-uk-winner-of-activity-of-the-year-award-2021</a> |
| 18 | Tiny Tickers                                      | 1078114   | <a href="https://www.tinytickers.org/">https://www.tinytickers.org/</a>                                                                                                                                                               |
| 19 | Together for Short Lives                          | 1144022   | <a href="https://www.togetherforshortlives.org.uk/">https://www.togetherforshortlives.org.uk/</a>                                                                                                                                     |
| 20 | TRACtion Cancer Support                           | SCO048145 | <a href="https://www.tractioncancersupport.org/">https://www.tractioncancersupport.org/</a>                                                                                                                                           |
| 21 | Trekstock                                         | 1132421   | <a href="https://www.trekstock.com/">https://www.trekstock.com/</a>                                                                                                                                                                   |
| 22 | Trevi                                             | 1075433   | <a href="https://trevi.org.uk/">https://trevi.org.uk/</a>                                                                                                                                                                             |
| 23 | Tuberous Sclerosis Association                    | 1039549   | <a href="https://tuberous-sclerosis.org/">https://tuberous-sclerosis.org/</a>                                                                                                                                                         |
| 24 | Turner Syndrome Support Society                   | 1080507   | <a href="https://tss.org.uk/">https://tss.org.uk/</a>                                                                                                                                                                                 |
| 25 | Twins Trust                                       | 1076478   | <a href="https://twinstrust.org/">https://twinstrust.org/</a>                                                                                                                                                                         |
| 26 | UK Breast Cancer Group                            | 1177296   | <a href="https://ukbcg.org/">https://ukbcg.org/</a>                                                                                                                                                                                   |
| 27 | UK Lung Cancer Coalition                          | N/A       | <a href="https://www.ukcc.org.uk/">https://www.ukcc.org.uk/</a>                                                                                                                                                                       |
| 28 | UK Primary Immune-deficiency Patient Support      | 1148789   | <a href="https://ukpips.org.uk/">https://ukpips.org.uk/</a>                                                                                                                                                                           |
| 29 | UK Thalassaemia Society                           | 275107    | <a href="https://ukts.org/">https://ukts.org/</a>                                                                                                                                                                                     |
| 30 | University of Newcastle Institute of Neuroscience | N/A       | <a href="https://www.ncl.ac.uk/medical-sciences/research/research-themes/neuroscience/">https://www.ncl.ac.uk/medical-sciences/research/research-themes/neuroscience/</a>                                                             |
| 31 | Urology Cancer Research and Education             | 1120887   | <a href="http://www.ucare-oxford.org.uk/">http://www.ucare-oxford.org.uk/</a>                                                                                                                                                         |
| 32 | Versus Arthritis                                  | 207711    | <a href="https://www.versusarthritis.org/">https://www.versusarthritis.org/</a>                                                                                                                                                       |
| 33 | Waldenstrom's Macroglobulinaemia UK               | 1187121   | <a href="https://wmuk.org.uk/">https://wmuk.org.uk/</a>                                                                                                                                                                               |
| 34 | White Chapel Mission                              | 227905    | <a href="https://whitechapel.org.uk/">https://whitechapel.org.uk/</a>                                                                                                                                                                 |
| 35 | Working with Cancer                               | 9092152   | <a href="https://workingwithcancer.co.uk/">https://workingwithcancer.co.uk/</a>                                                                                                                                                       |
| 36 | Young Epilepsy                                    | 311877    | <a href="https://www.youngepilepsy.org.uk/">https://www.youngepilepsy.org.uk/</a>                                                                                                                                                     |

## Inclusion/exclusion of patient organisations

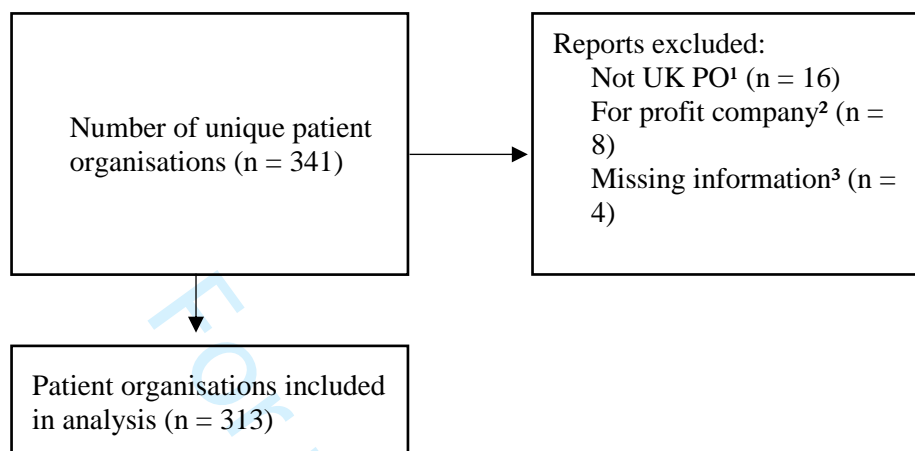

<sup>1</sup>Not aligned with geographical scope e.g. Irish, US-based

<sup>2</sup>Not aligned with EFPIA's definition of patient organisation

<sup>3</sup>Organisations for whose nature is unclear i.e. patient organisation website could not be identified



**Additional tables and figures**

**Figure 2. Histogram of unique companies funding patient organisations in 2020, broken down by rarity of disease**

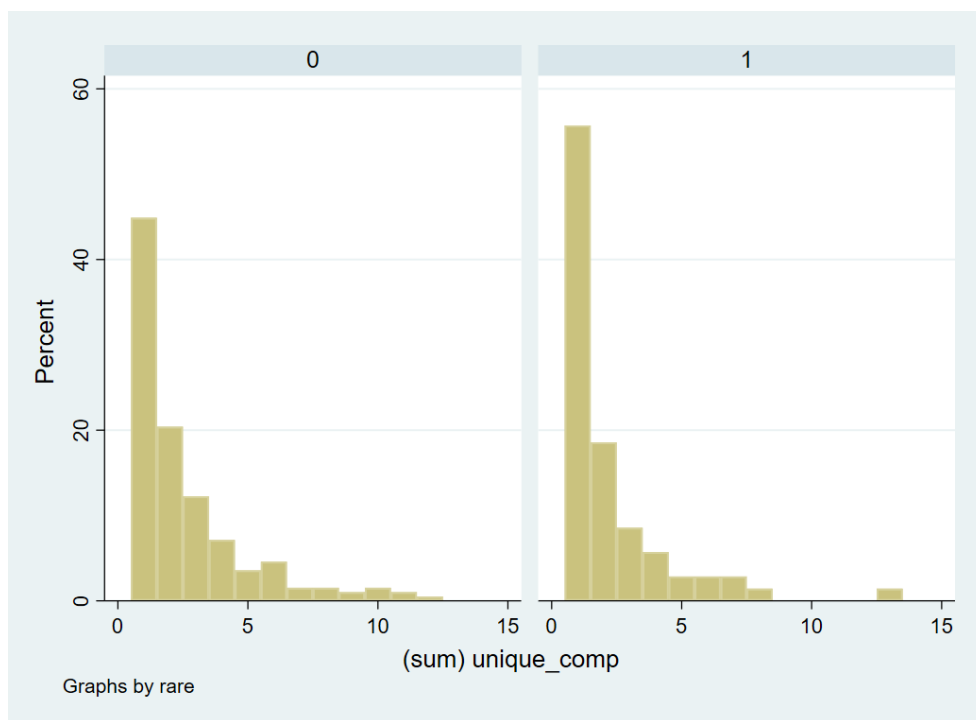

**Figure 3. Histogram of share of overall industry funding to patient organisations coming from each contributing company in 2020, broken down by rarity of disease**

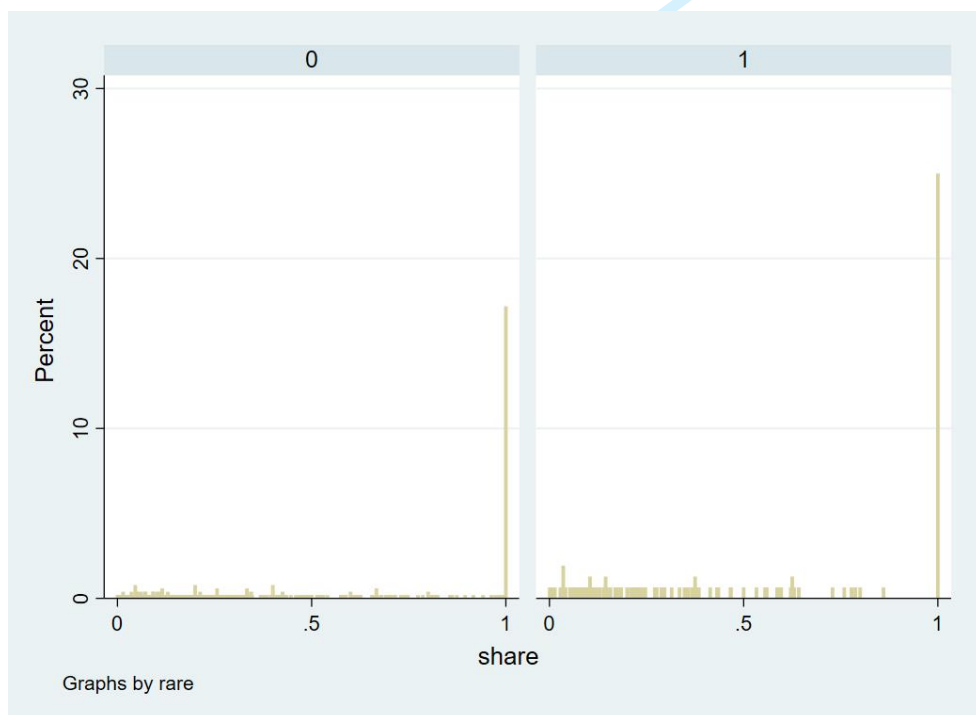

**Figure 4. Histogram of share of industry funding of each organisation comprised by the single highest payment in 2020, broken down by rarity of disease**

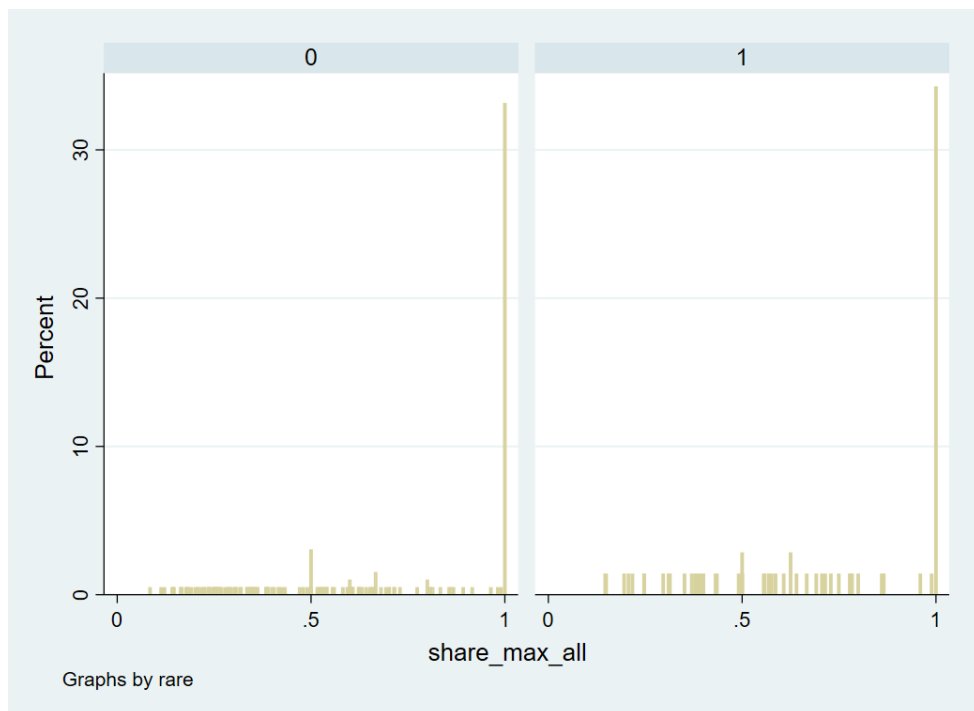

For peer review only

## 1 Sub-group analyses

### 2 Excluded patient organisations

3 66 payments made 28 to patient organisations were excluded from the analysis as they did not  
 4 match EFPIA's definition of "*not-for-profit organisations, mainly composed of patients and/or*  
 5 *caregivers, that represent and/or support the needs of patients and/or caregivers*".

6 Figure 5 illustrates the reasons for patient organisations exclusion. Most of the excluded patient  
 7 organisations were for profit organisations (47%; n=31), followed by not UK-based (42%;  
 8 n=28) and organisations for which no information could be found online (11%; n=7).

9 Non-UK patient organisations mostly comprised international alliances of patient  
 10 organisations, European or Irish organisations. We classified organisations as for-profit if they  
 11 appeared in the UK government repository of companies<sup>1</sup> as *private limited companies*. Care  
 12 homes, consultancies and rehabilitation clinics were the most prominent in this category.

13 Overall, payments to excluded patient organisations amounted to £869,677, about 4% of the  
 14 included payments (Figure 6).

15 **Figure 5. Excluded patient organisations by reason of exclusion**

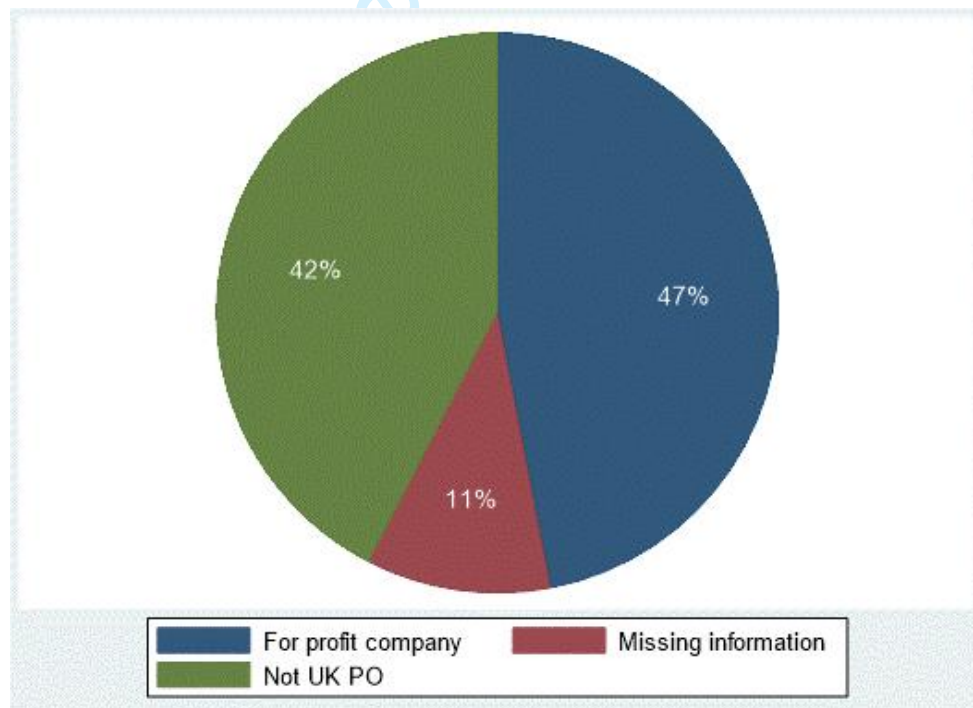

16

<sup>1</sup> <https://find-and-update.company-information.service.gov.uk/>

1 **Figure 6. Payments to included and excluded patient organisations**

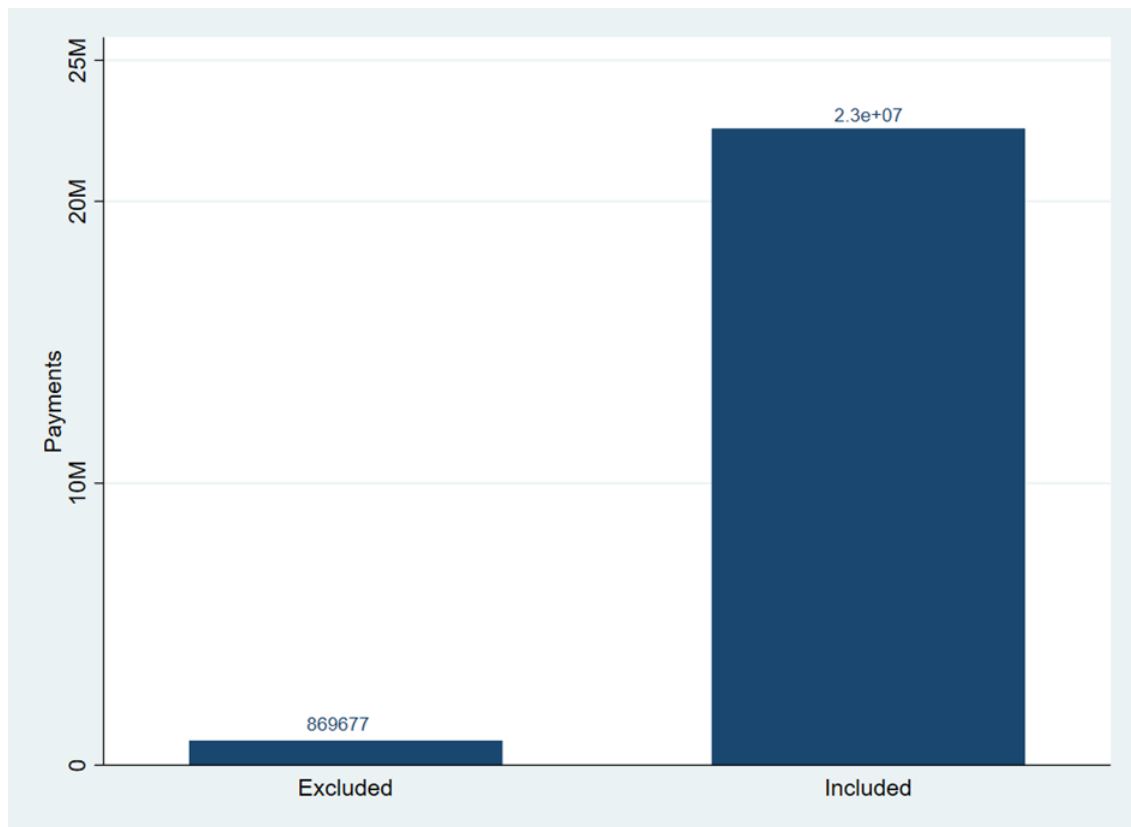

2

3

## References

1. PMCPA. ABPI Code of Practice 2021 [Available from: <https://www.pmcpa.org.uk/the-code/2021-interactive-abpi-code-of-practice/>].
2. Rickard E, Carmel E, Ozieranski P. Comparing pharmaceutical company payments in the four UK countries: a cross-sectional and social network analysis. *BMJ Open* 2023;13(3):e061591. doi: 10.1136/bmjopen-2022-061591
3. Ozieranski P, Rickard E, Mulinari, Shai. Exposing drug industry funding of UK patient organisations. *BMJ* 2019;365:l1806. doi: 10.1136/bmj.l1806
4. ONS. Consumer price inflation time series: Office for National Statistics; 2022 [Available from: <https://www.ons.gov.uk/economy/inflationandpriceindices/timeseries/l55o/mm23>].
5. HMRC. HMRC yearly average and spot rates: HM Revenue and Customs; [Available from: <https://www.gov.uk/government/publications/exchange-rates-for-customs-and-vat-yearly>].
6. HMRC. HMRC yearly average and spot rates: HM Revenue and Customs; 2022 [Available from: <https://www.gov.uk/government/publications/exchange-rates-for-customs-and-vat-yearly>].
7. Orphanet. The portal for rare diseases and orphan drugs 2022 [Available from: [https://www.orpha.net/consor/cgi-bin/Disease\\_Search\\_Simple.php?lng=EN](https://www.orpha.net/consor/cgi-bin/Disease_Search_Simple.php?lng=EN)].
8. NICE. Policy on declaring and managing interests for NICE advisory committees, 2018.
9. WHO. ICD-11 for Mortality and Morbidity Statistics 2022 [Available from: <https://icd.who.int/browse11/l-m/en#/http://id.who.int/icd/entity/465177735?view=G0>].

## CHEERS 2022 Checklist

| Topic                                | No. | Item                                                                                                                            | Location where item is reported |
|--------------------------------------|-----|---------------------------------------------------------------------------------------------------------------------------------|---------------------------------|
| <b>Title</b>                         |     |                                                                                                                                 |                                 |
|                                      | 1   | Identify the study as an economic evaluation and specify the interventions being compared.                                      | p. 1, lines 1-3                 |
| <b>Abstract</b>                      |     |                                                                                                                                 |                                 |
|                                      | 2   | Provide a structured summary that highlights context, key methods, results, and alternative analyses.                           | p. 2, lines 4-33                |
| <b>Introduction</b>                  |     |                                                                                                                                 |                                 |
| <b>Background and objectives</b>     | 3   | Give the context for the study, the study question, and its practical relevance for decision making in policy or practice.      | p. 4, 5, 6 (all lines)          |
| <b>Methods</b>                       |     |                                                                                                                                 |                                 |
| <b>Health economic analysis plan</b> | 4   | Indicate whether a health economic analysis plan was developed and where available.                                             | N/A                             |
| <b>Study population</b>              | 5   | Describe characteristics of the study population (such as age range, demographics, socioeconomic, or clinical characteristics). | p. 7, lines 3-4                 |
| <b>Setting and location</b>          | 6   | Provide relevant contextual information that may influence findings.                                                            | p. 7, line 4                    |
| <b>Comparators</b>                   | 7   | Describe the interventions or strategies being compared and why chosen.                                                         | N/A                             |
| <b>Perspective</b>                   | 8   | State the perspective(s) adopted by the study and why chosen.                                                                   | p. 7, line 4                    |
| <b>Time horizon</b>                  | 9   | State the time horizon for the study and why appropriate.                                                                       | p. 7, line 4                    |
| <b>Discount rate</b>                 | 10  | Report the discount rate(s) and reason chosen.                                                                                  | N/A                             |
| <b>Selection of outcomes</b>         | 11  | Describe what outcomes were used as the measure(s) of benefit(s) and harm(s).                                                   | p. 7, 8, 9 (all lines)          |
| <b>Measurement of outcomes</b>       | 12  | Describe how outcomes used to capture benefit(s) and harm(s) were measured.                                                     | p. 7, 8, 9 (all lines)          |

| Topic                                                                        | No. | Item                                                                                                                                                                          | Location where item is reported   |
|------------------------------------------------------------------------------|-----|-------------------------------------------------------------------------------------------------------------------------------------------------------------------------------|-----------------------------------|
| <b>Valuation of outcomes</b>                                                 | 13  | Describe the population and methods used to measure and value outcomes.                                                                                                       | p. 9, lines 12-15                 |
| <b>Measurement and valuation of resources and costs</b>                      | 14  | Describe how costs were valued.                                                                                                                                               | N/A                               |
| <b>Currency, price date, and conversion</b>                                  | 15  | Report the dates of the estimated resource quantities and unit costs, plus the currency and year of conversion.                                                               | p. 7, lines 30-34                 |
| <b>Rationale and description of model</b>                                    | 16  | If modelling is used, describe in detail and why used. Report if the model is publicly available and where it can be accessed.                                                | p. 8, lines 17-28                 |
| <b>Analytics and assumptions</b>                                             | 17  | Describe any methods for analysing or statistically transforming data, any extrapolation methods, and approaches for validating any model used.                               | p. 9, lines 27-31                 |
| <b>Characterising heterogeneity</b>                                          | 18  | Describe any methods used for estimating how the results of the study vary for subgroups.                                                                                     | N/A                               |
| <b>Characterising distributional effects</b>                                 | 19  | Describe how impacts are distributed across different individuals or adjustments made to reflect priority populations.                                                        | N/A                               |
| <b>Characterising uncertainty</b>                                            | 20  | Describe methods to characterise any sources of uncertainty in the analysis.                                                                                                  | N/A                               |
| <b>Approach to engagement with patients and others affected by the study</b> | 21  | Describe any approaches to engage patients or service recipients, the general public, communities, or stakeholders (such as clinicians or payers) in the design of the study. | p. 9, lines 32-35                 |
| <b>Results</b>                                                               |     |                                                                                                                                                                               |                                   |
| <b>Study parameters</b>                                                      | 22  | Report all analytic inputs (such as values, ranges, references) including uncertainty or distributional assumptions.                                                          | N/A                               |
| <b>Summary of main results</b>                                               | 23  | Report the mean values for the main categories of costs and outcomes of interest and summarise them in the most appropriate overall measure.                                  | p. 10, 11, 12, 13, 14 (all lines) |
| <b>Effect of uncertainty</b>                                                 | 24  | Describe how uncertainty about analytic judgments, inputs, or projections affect findings. Report the effect of choice of discount rate and time horizon, if applicable.      | N/A                               |

| Topic                                                                       | No. | Item                                                                                                                                                    | Location where item is reported |
|-----------------------------------------------------------------------------|-----|---------------------------------------------------------------------------------------------------------------------------------------------------------|---------------------------------|
| <b>Effect of engagement with patients and others affected by the study</b>  | 25  | Report on any difference patient/service recipient, general public, community, or stakeholder involvement made to the approach or findings of the study | p. 9, lines 32-35               |
| <b>Discussion</b>                                                           |     |                                                                                                                                                         |                                 |
| <b>Study findings, limitations, generalisability, and current knowledge</b> | 26  | Report key findings, limitations, ethical or equity considerations not captured, and how these could affect patients, policy, or practice.              | p. 15-17 (all lines)            |
| <b>Other relevant information</b>                                           |     |                                                                                                                                                         |                                 |
| <b>Source of funding</b>                                                    | 27  | Describe how the study was funded and any role of the funder in the identification, design, conduct, and reporting of the analysis                      | p. 18, lines 11-15              |
| <b>Conflicts of interest</b>                                                | 28  | Report authors conflicts of interest according to journal or International Committee of Medical Journal Editors requirements.                           | p. 18, lines 16-20              |

From: Husereau D, Drummond M, Augustovski F, et al. Consolidated Health Economic Evaluation Reporting Standards 2022 (CHEERS 2022) Explanation and Elaboration: A Report of the ISPOR CHEERS II Good Practices Task Force. Value Health 2022;25.  
[doi:10.1016/j.jval.2021.10.008](https://doi.org/10.1016/j.jval.2021.10.008)



# BMJ Open

## Industry funding of patient organisations in the United Kingdom: A retrospective study of commercial determinants, funding concentration and disease prevalence

|                                 |                                                                                                                                                                                                            |
|---------------------------------|------------------------------------------------------------------------------------------------------------------------------------------------------------------------------------------------------------|
| Journal:                        | <i>BMJ Open</i>                                                                                                                                                                                            |
| Manuscript ID                   | bmjopen-2022-071138.R3                                                                                                                                                                                     |
| Article Type:                   | Original research                                                                                                                                                                                          |
| Date Submitted by the Author:   | 01-Jun-2023                                                                                                                                                                                                |
| Complete List of Authors:       | Gentilini, Arianna; The London School of Economics and Political Science, Department of Health Policy<br>Parvanova, Iva; The London School of Economics and Political Science, Department of Health Policy |
| <b>Primary Subject Heading</b>: | Health policy                                                                                                                                                                                              |
| Secondary Subject Heading:      | Health policy                                                                                                                                                                                              |
| Keywords:                       | Health policy < HEALTH SERVICES ADMINISTRATION & MANAGEMENT, PUBLIC HEALTH, Health Equity                                                                                                                  |
|                                 |                                                                                                                                                                                                            |

SCHOLARONE™  
Manuscripts



I, the Submitting Author has the right to grant and does grant on behalf of all authors of the Work (as defined in the below author licence), an exclusive licence and/or a non-exclusive licence for contributions from authors who are: i) UK Crown employees; ii) where BMJ has agreed a CC-BY licence shall apply, and/or iii) in accordance with the terms applicable for US Federal Government officers or employees acting as part of their official duties; on a worldwide, perpetual, irrevocable, royalty-free basis to BMJ Publishing Group Ltd ("BMJ") its licensees and where the relevant Journal is co-owned by BMJ to the co-owners of the Journal, to publish the Work in this journal and any other BMJ products and to exploit all rights, as set out in our [licence](#).

The Submitting Author accepts and understands that any supply made under these terms is made by BMJ to the Submitting Author unless you are acting as an employee on behalf of your employer or a postgraduate student of an affiliated institution which is paying any applicable article publishing charge ("APC") for Open Access articles. Where the Submitting Author wishes to make the Work available on an Open Access basis (and intends to pay the relevant APC), the terms of reuse of such Open Access shall be governed by a Creative Commons licence – details of these licences and which [Creative Commons](#) licence will apply to this Work are set out in our licence referred to above.

Other than as permitted in any relevant BMJ Author's Self Archiving Policies, I confirm this Work has not been accepted for publication elsewhere, is not being considered for publication elsewhere and does not duplicate material already published. I confirm all authors consent to publication of this Work and authorise the granting of this licence.

1  
2  
3  
4 1 **Industry funding of patient organisations in the United Kingdom: A**  
5 2 **retrospective study of commercial determinants, funding concentration and**  
6 3 **disease prevalence**  
7  
8  
9

10 4  
11 5 Arianna Gentilini and Iva Parvanova

12 6 Department of Health Policy, London School of Economics and Political Science, London,  
13 7 UK  
14  
15  
16  
17 8  
18  
19 9

20  
21 10 **Corresponding author**  
22

23 11 Arianna Gentilini

24  
25 12 Department of Health Policy  
26 13 Cowdray House, COW.4.09  
27 14 London School of Economics  
28 15 Houghton street  
29 16 London WC2A 2AE  
30 17 England  
31 18 Email: [a.gentilini@lse.ac.uk](mailto:a.gentilini@lse.ac.uk)  
32  
33  
34  
35  
36  
37  
38  
39  
40  
41  
42  
43  
44  
45  
46  
47  
48  
49  
50  
51  
52  
53  
54  
55  
56  
57  
58  
59  
60

1  
2  
3 1 **Abstract**  
4

5 2 **Objectives** – To assess the relationship between UK-based patient organisation funding and  
6 3 companies' commercial interests in rare and non-rare diseases in 2020.

7 4 **Design** – Retrospective analysis of the value and volume of payments from pharmaceutical  
8 5 companies to patient organisations in the UK matched with data on the conditions supported  
9 6 by patient organisations and drugs in companies' approved portfolios and research and  
10 7 development pipelines.

11 8 **Setting** – UK.

12 9 **Participants** – 74 pharmaceutical companies making payments to 341 UK-based patient  
13 10 organisations.

14 11 **Main outcome measures** – Alignment between the commercial interests of pharmaceutical  
15 12 companies and the disease area focus of patient organisations; difference in the volume and  
16 13 value of payments to patient organisations broken down by prevalence of conditions; industry  
17 14 funding concentration, measured as the number of companies funding each patient  
18 15 organisations, the share of overall industry funding coming from each contributing company  
19 16 and the share of industry funding of each organisation comprised by the single highest  
20 17 payments.

21 18 **Results** – 1,422 payments were made by 74 companies to 341 patient organisations. Almost  
22 19 all funds (90%) from pharmaceutical companies were directed to patient organisations that are  
23 20 aligned with companies' approved drug portfolios and research and development pipelines.  
24 21 Despite rare diseases affecting less than 5% of the UK population, more than 20% of all  
25 22 payments were directed to patient organisations which target such conditions. Patient  
26 23 organisations focusing on rare diseases relied on payments from fewer companies (*p-value* =  
27 24 0.0031) compared to organisations focusing on non-rare diseases.

28 25 **Conclusions** – Companies predominantly funded patient organisations operating in therapeutic  
29 26 areas relevant to companies' portfolio or drug development pipeline. Patient organisations  
30 27 focusing on rare diseases received more funding relative to the number of patients affected by  
31 28 these conditions and relied more heavily on payments from fewer companies compared to  
32 29 organisations targeting non-rare diseases. Increased independence of patient organisations  
33 30 could help avoiding conflicts of interest.  
34  
35  
36  
37  
38  
39  
40  
41  
42  
43  
44  
45  
46  
47  
48  
49  
50  
51  
52  
53  
54  
55  
56  
57  
58  
59  
60

1  
2  
3  
4  
5  
6  
7  
8  
9  
10  
11  
12  
13  
14  
15  
16  
17  
18  
19  
20  
21  
22  
23  
24  
25  
26  
27  
28  
29  
30  
31  
32  
33  
34  
35  
36  
37  
38  
39  
40  
41  
42  
43  
44  
45  
46  
47  
48  
49  
50  
51  
52  
53  
54  
55  
56  
57  
58  
59  
60

## 1 Strengths and limitations of this study

- 2 • We develop a methodology to determine the concordance between commercial interests  
3 of pharmaceutical companies and disease areas supported by patient organisations.
- 4 • We present a comparative analysis of industry funding to patient organisations  
5 depending on the prevalence of the disease(s) they support.
- 6 • Our analysis focuses on a recent time period which might differ from historical trends.  
7

For peer review only

## 1 Introduction

2 Patient organisations – not-for-profit organisations mainly composed of patients and/or  
3 caregivers that represent and support the needs of patients or caregivers<sup>1 2</sup> – play an important  
4 role in the development, regulatory review, and adoption of new drugs.

5 During research and development, patient organisations effectively advocate for resources to  
6 be directed to conditions where unmet need is highest.<sup>3 4</sup> Patient organisations support research  
7 design and planning, helping to identify patient-relevant study endpoints.<sup>4</sup> Patient organisations  
8 also represent patient views and preferences at the time of regulatory review and health  
9 technology assessment of new drugs.<sup>5 6</sup> For example, during technology appraisals conducted  
10 by the National Institute for Health and Care Excellence (NICE), which makes funding  
11 recommendations for the English National Health Service (NHS), patients, and organisations  
12 representing the interests of patients, provide testimonies of their first-hand experiences on how  
13 the disease affects them and those around them.<sup>7</sup> Finally, when drugs are launched, patient  
14 organisations contribute to dissemination of research results to patient community and  
15 clinicians, and offer support and information on therapies available.<sup>4 8</sup>

16 Given the increasingly important role of patient organisations it is vital to understand their  
17 financial ties with pharmaceutical companies. Previous studies documented the large number  
18 and high value of payments from pharmaceutical companies to patient organisations,<sup>2 8-10</sup> the  
19 uneven distribution between and within therapeutic areas,<sup>2 10</sup> and the concentration of payments  
20 coming from a small number of pharmaceutical firms across multiple jurisdictions.<sup>2 8-16</sup>

21 What remains unknown is the alignment between the commercial interests of pharmaceutical  
22 companies and UK patient organisations' activities. Prior research has demonstrated that  
23 industry tends to prioritize commercially attractive conditions, and there is evidence to suggest  
24 that the marketing of a drug for a particular disease is associated with increased industry  
25 funding to patient organisations operating in that area.<sup>2 10</sup> However, such studies have typically  
26 been conducted in different geographic settings and have focused solely on marketed drugs,  
27 rather than examining the entire research and development pipeline of pharmaceutical  
28 companies. This is especially important given the lengthy timeline for drugs to reach the  
29 market,<sup>17</sup> as failure to consider drugs currently undergoing clinical trials may result in an  
30 incomplete picture.

31 Another gap in the literature relates to the dynamics between the pharmaceutical industry and  
32 patient organisations supporting rare vs. non-rare conditions. In the UK, diseases are defined  
33 rare if they affect up to 5 people in 10,000.<sup>18 19</sup> The low prevalence of rare diseases and their  
34 different aetiology, coupled with the lack of interest from policymakers and manufacturers,  
35 who often prioritise more profitable and prevalent diseases, has necessitated the formation of  
36 patient organisations to advocate for the needs of rare disease patients.<sup>20 21</sup> The National  
37 Organisation for Rare Disorders (NORD), serves as the umbrella organisation for rare disease  
38 patients in the United States (US) and has been instrumental in lobbying for scientific support  
39 and economic incentives to stimulate innovation in rare diseases.<sup>22</sup> This advocacy ultimately  
40 led to the passing of the Orphan Drug Act in 1983 in the USA and the EU Regulation on Orphan  
41 Medicinal Products in Europe in 2000.<sup>18 23</sup>

1  
2  
3 1 Moreover, the limited availability and complexity of medical knowledge regarding rare  
4 2 diseases have also fostered patients and families affected by these conditions to come together  
5 3 to provide each other with support and medical expertise.<sup>20 24</sup> Patient organisations, which are  
6 4 primarily composed of patients and their caregivers, are in a unique position to share first-hand  
7 5 experiences that can inform research and regulatory decisions.<sup>25</sup> While this is true also for non-  
8 6 rare conditions, patient organisations' input in regulatory and health technology appraisals is  
9 7 particularly important in the context of rare diseases due to scarce evidence. For example, the  
10 8 Scottish Medicines Consortium (SMC) provides opportunities for patient groups and clinicians  
11 9 to have a stronger voice in the decision-making process for drugs used to treat rare and end-of-  
12 10 life conditions.<sup>26</sup> Similarly, three members of patient organisations sit in the Committee for  
13 11 Orphan Medicinal Products (COMP) within the European Medicines Agency (EMA), the body  
14 12 responsible for granting orphan designations to drugs. Patient organisation-led registries that  
15 13 collect real-world data on disease progression can de-risk drug development for rare diseases.<sup>20</sup>  
16 14 While observational studies are common in non-rare diseases, they usually do not require the  
17 15 support of patient organisations' networks as patients are easier to identify and recruit.<sup>3</sup>

18 16 Finally, there has been limited exploration of the concentration of industry funding for patient  
19 17 organisations. A recent study by Mulinari and colleagues (2022) examined the average number  
20 18 of pharmaceutical companies making payments to Danish patient organisations,<sup>15</sup> while only  
21 19 one study has investigated the share of industry funding and the top drug company donor's  
22 20 share in UK patient organisations' income.<sup>11</sup> However, no study has specifically focused on the  
23 21 number of companies funding UK patient organisations, nor have they explored whether  
24 22 organisations' industry funding differs based on disease rarity.

25 23 Our paper aims to contribute to and expand on existing literature by examining the concordance  
26 24 between the commercial interests of pharmaceutical companies and patient organisations'  
27 25 activities in the UK. Using publicly available data on 2020 payments, we analysed the volume,  
28 26 value of payments to patient organisations according to their disease area of interest, with the  
29 27 objective of examining whether there are differences in funding patterns between rare and non-  
30 28 rare diseases. Lastly, we examined the concentration of industry funding, namely how many  
31 29 companies funded each patient organisation and the extent to which organisations might have  
32 30 been reliant on funding from a single company. Based on the reviewed literature, we formulated  
33 31 the following hypotheses:

- 34 32 - *Hypothesis 1:* Regarding the concordance between the commercial interests of  
35 33 pharmaceutical companies and patient organisations' activities, we expect no difference  
36 34 between rare and non-rare patient organisations, under the assumption that companies  
37 35 are unlikely to fund organisations out of altruistic motives;
- 38 36 - *Hypothesis 2:* Furthermore, we hypothesise that patient organisations targeting rare  
39 37 diseases would receive less overall funding due to their low prevalence. However, the  
40 38 existing incentives, high costs and consequent profitability of some orphan-designated  
41 39 drugs might affect the proportion of funding directed towards these organisations.<sup>27 28</sup>
- 42 40 - *Hypothesis 3:* Considering the limited availability of drugs for rare diseases from a  
43 41 handful of manufacturers, we expect organisations focusing on these conditions to rely

1  
2  
3  
4  
5  
6  
7  
8  
9  
10  
11  
12  
13  
14  
15  
16  
17  
18  
19  
20  
21  
22  
23  
24  
25  
26  
27  
28  
29  
30  
31  
32  
33  
34  
35  
36  
37  
38  
39  
40  
41  
42  
43  
44  
45  
46  
47  
48  
49  
50  
51  
52  
53  
54  
55  
56  
57  
58  
59  
60

1 on payments of higher value and from fewer companies compared to those targeting  
2 more prevalent conditions.

For peer review only



## 1 **Methods**

### 2 **Data on industry payments**

3 Disclosure reports on pharmaceutical companies' websites were our primary data source on  
4 payments from the pharmaceutical industry to UK patient organisations in 2020.<sup>29</sup> Disclosing  
5 payments to patient organisations is a requirement of Clause 29 of the Association of British  
6 Pharmaceutical Industry (ABPI) Code of Practice.<sup>30</sup> Specifically, the ABPI requires companies  
7 to keep a public record of any payment made to patient organisations on their website for a  
8 minimum of three years following the payment.<sup>30</sup> Companies that sign up to abide by the ABPI  
9 Code accept the jurisdiction of the Prescription Medicines Code of Practice Authority  
10 (PMCPA, code regulator), which also affects non-ABPI members operating in the UK.<sup>30</sup>  
11 Companies may be sanctioned by the PMCPA if they do not disclose their payments.<sup>30</sup> In an  
12 effort to increase transparency, Disclosure UK, an industry-led platform showing payments  
13 from pharmaceutical companies to healthcare professionals and organisations, launched a  
14 gateway in 2020 that collects hyperlinks to companies' disclosures of payments to patient  
15 organisations.<sup>31</sup>

16 First, we screened the websites of all pharmaceutical companies abiding by the ABPI Code,  
17 aided by the Disclosure UK patient organisations gateway. We retrieved payments information  
18 from the companies' websites to ensure that all payments were captured. Second, in light of a  
19 recent study unveiling that payments to patient organisations were misreported in the  
20 Disclosure UK database of payments to healthcare organisations (HCOs),<sup>16</sup> we screened the  
21 2020 Disclosure UK HCOs database for payments to patient organisations.

22 If payments were not disclosed in the company's website nor in the Disclosure UK HCOs  
23 database, we assumed that the company did not make any payments to patient organisations in  
24 2020, as commonly assumed in the literature.<sup>2</sup>

25 One investigator (AG) extracted payment disclosures from the companies' websites. These  
26 comprised the name of the patient organisation, the year when the payment was made, the  
27 reason for the payment and its value in the currency reported by the disclosing company. The  
28 2020 Disclosure UK HCOs database was also screened, and recipients were matched to  
29 standardised patient organisations names. To ensure the data's accuracy, the final database was  
30 scanned for duplicates, but no such instances were found. When reported in different  
31 currencies, such as United States Dollars (USD), Swiss Franc (CHF), Swedish Krona (SEK),  
32 Norwegian Krone (NKK) and Danish Krone (DKK), the value of the payment was converted  
33 to Great British Pounds (GBP), using the ONS historical yearly conversion rates.<sup>32 33</sup> All  
34 payments are reported in 2020 GBP. Two in-kind payments with a monetary value of zero were  
35 excluded from the analysis. Further details on variables' cleaning and coding can be found in  
36 the Supplemental Material.

### 37 **Data on patient organisations**

38 We retrieved data on patient organisations from their websites. Details on the therapeutic area  
39 they advocated for – proxied by International Classification of Diseases Version 11 (ICD-11)

1 codes – and whether the condition(s) was rare or non-rare were also extracted. Conditions were  
2 considered rare if they appeared in the Orphanet database of rare diseases,<sup>34</sup> which is platform  
3 and repository of data on rare diseases and orphan drugs. Patient organisations that did not  
4 match the European Federation of Pharmaceutical Industries and Associations (EFPIA)  
5 definition of what constitutes a patient organisation were excluded from the analysis. We chose  
6 the EFPIA’s definition for the following reasons. First, this corresponds the definition used in  
7 the wider peer-reviewed literature.<sup>2 35</sup> Second, other commonly used definitions, such as the  
8 one from the EMA, refer to the structure of patient organisations’ governing bodies, which  
9 have to consist of over 50% patients.<sup>36</sup> Considering the high number of patient organisations  
10 included in our analysis, this requirement was challenging – if not impossible – to verify.  
11 Second, EFPIA’s definition indicates what the pharmaceutical industry considers to be a patient  
12 organisation. Therefore, it helped us minimize selection bias issues as it includes a wide range  
13 of organisations. We excluded 66 payments to patient organisations that did not match EFPIA’s  
14 definition. Sub-group analyses on excluded organisations can be found in the Supplemental  
15 Material.

### 16 **Determining commercial interests**

17 We assessed whether – and the extent to which – a pharmaceutical company holds an interest  
18 in the disease supported by a patient organisation. We adapted the definition of ‘interest’  
19 provided by NICE<sup>37</sup>. An interest is when there is, or could be perceived to be, an opportunity  
20 for a pharmaceutical company to benefit in the disease area where the patient organisation  
21 operates. This could include cases where the pharmaceutical company has a drug developed or  
22 in development for a condition targeted by the patient organisation, or where a drug in the  
23 company’s portfolio or pipeline is restricted to a specific population affected by the disease  
24 supported by the patient organisation. We define portfolio as a group of drugs that a  
25 pharmaceutical company has already developed, gained regulatory approval for, and is actively  
26 marketing or selling. Conversely, pipeline refers to the collection of drug candidates being  
27 developed by a pharmaceutical company, at various stages of development, from preclinical  
28 research to clinical trials.

29 To establish whether an interest existed or not, we first classified the conditions targeted by  
30 patient organisations to ICD-11 codes using the online ICD-11 database.<sup>38</sup> ICD-11 codes are  
31 mutually exclusive, exhaustive and are arranged as a single hierarchical tree, from level one  
32 (most general e.g., *neoplasms*) to five (most specific, e.g. *plasma cell myeloma*). This means  
33 that specific diseases are nested within broader classifications. Although some patient  
34 organisations, such as hospital charities, carers organisations, and hospices, could not be  
35 matched to specific ICD-11 codes, they were included in the analysis to provide a  
36 comprehensive overview. As a result, the analysis presented results for both disease-specific  
37 and non-disease-specific organisations.

38 We then searched companies’ annual reports, websites and the ClinicalTrials.gov registry to  
39 determine whether each company had an interest in the condition targeted by the patient  
40 organisation receiving the payment. Figure 1 schematically illustrates the approach taken to  
41 understand whether – and the degree to which – a company has an interest in the conditions

1  
2  
3 1 (*definitely yes, probably yes, no*). For example, if *Company X* declares in its annual report  
4 2 having a drug in development for multiple myeloma and made a payment to *Blood Cancer UK*,  
5 3 this would be coded as *probably yes*, as the company has a product in its pipeline or portfolio  
6 4 nested within a broader class of conditions targeted by the patient organisation. Conversely,  
7 5 should *Company X* have made a payment to *Myeloma UK*, this would have been coded as  
8 6 *definitely yes*, as there is perfect alignment between the condition targeted by the patient  
9 7 organisation and by *Company X's* drug. Cases in which a company's interest in a certain  
10 8 condition could not be identified were coded as *no*. However, these instances might be due to  
11 9 limitations in data availability and therefore do not necessarily indicate that there was no  
12 10 company interest. Data on pharmaceutical companies' portfolio and pipeline were retrieved  
13 11 from their latest annual reports, company websites and ClinicalTrials.gov.<sup>39</sup>

12 12 One investigator (AG) initially coded all data, while the other (IP) blindly re-coded a 30%  
13 13 random sample of payments to validate the data collection process and minimise the risk of  
14 14 reporting errors. We followed this process when validating all data sources described above.  
15 15 Any disagreement was discussed until consensus was reached.

### 16 **Analysis of industry funding concentration**

17 17 We assessed the concentration of industry funding received by patient organisations. In a prior  
18 18 study, Ozieranski and colleagues examined funding disparities among healthcare organisations  
19 19 in the UK in 2015, using the Gini coefficient to assess the distribution of funding.<sup>40</sup> However,  
20 20 the authors acknowledged that the data preparation process presented challenges, limiting the  
21 21 analysis to payments from a single year. While this methodology has its advantages, we found  
22 22 that the time-consuming process of reshaping the data outweighed the benefits over using  
23 23 descriptive statistics. In particular, we calculated (1) the number of companies funding each  
24 24 patient organisations, (2) the share of overall industry funding to each patient organisations  
25 25 coming from each contributing company and (3) the share of industry funding of each  
26 26 organisation comprised by the single highest payment.

27 27 The Supplemental Material provides further details on the data collection and how the  
28 28 outcomes were constructed. Descriptive statistics and tests, such as ranges and Mann–Whitney  
29 29 U tests, were presented in the analysis. These statistics were preferred over the mean due to the  
30 30 skewed distribution of the data analysed. All analyses and data visualisations were performed  
31 31 using Stata 17 and RStudio (*ggplot2* package), respectively.

### 32 **Patient and public involvement**

33 33 Patients were not involved in this study as our analyses focused on patient organisations as  
34 34 institutional actors rather than single patients with specific conditions. We plan to disseminate  
35 35 key findings from our analysis to patients and members of the public.

## 1 Results

2 In 2020, 74 companies made 1,422 payments to 341 patient organisations, amounting to £22.6  
3 million. Out of the total of 1,422 payments made by pharmaceutical companies to patient  
4 organisations in 2020, 82% (1,168 payments) with a value of £18 million were accurately  
5 disclosed on the companies' websites. The remaining 18% (254 payments) with a value of £4.6  
6 million were reported in the Disclosure UK HCOs database. Among the companies, 24 out of  
7 74 reported payments only on their websites, while 14 reported payments only in the Disclosure  
8 UK HCOs database, and 36 reported payments in both.

9 Overall, *diseases of the nervous system* (£4.3 million) was the most funded therapeutic area  
10 over time, followed by *neoplasms* (£3.2 million) and *endocrine, nutritional or metabolic*  
11 *diseases* (£3.4 million). The conditions that received more funding in 2020 were multiple  
12 sclerosis (£1.7 million), followed by obesity (£1.4 million) and epilepsy (£1 million). Pfizer,  
13 Novo Nordisk, UCB, Novartis and Roche were the top five funders over the study period  
14 (Figure 2). These companies contributed to more than a third (36%) of all payments.

15 Table 1 summarises the number and value of payments to patient organisations.

### 16 Companies' interest in payments to patient organisations

17 In 2020, 85% of all payments were directed to patient organisations that were judged to be  
18 aligned with their portfolio or pipeline. Only 15% of payments were made to organisations that  
19 focused on conditions that could not be linked to a product in the funder's portfolio or pipeline.  
20 Table 2 shows the volume and value of payments, broken down by the company's interest  
21 variable, overall and whether patient organisations targeted a rare or non-rare disease.  
22 Payments to patient organisations targeting a disease for which the company has a product  
23 developed or in development (*definitely yes*) made up 56% and 54% for patient organisations  
24 targeting rare and non-rare conditions, respectively. However, this difference was not  
25 statistically significant as anticipated in *Hypothesis 1* ( $\chi^2 = 1.049$ ,  $p\text{-value} = 0.592$ ).

26 The monetary value of payments coded as *definitely yes* accounted for 55% of the overall  
27 payment value. However, this was as high as 67% for patient organisations targeting rare  
28 diseases, versus 59% for organisations focusing on non-rare conditions. This difference was  
29 found to be statistically significant ( $\chi^2 = 370.163$ ,  $p\text{-value} = 0.058$ ). When payments coded  
30 as *probably yes* were included, the share increased to 90% and 97% for all patient organisations  
31 and disease-specific organisations only, respectively.

1 **Table 1. Number and value of payments from the pharmaceutical industry to UK patient organisations broken down by year and rarity of diseases**

2 **Payment statistics**

---

3 **Number of payments** 1,422

4 **Median payment (IQR; overall)** £7,943 (£1,200 - £15,000)

5 **Median payment (IQR; rare)** £8,775 (£2,500 - £15,965)

6 **Median payment (IQR; non-rare)** £9,060 (£1,520 - £16,850)

7 **Value of payments (£; overall)** £22,577,314

8 **Value of payments (£; rare)** £4,629,779

9 **Value of payments (£; non-rare)** £15,875,662

10 **Number of pharmaceutical companies** 74

11 **Number of patient organisations** 341

---

12 Abbreviations: IQR (Interquartile range).

13 Notes: All payments are expressed in 2020 GBP. The Supplemental Materials detail the conversion rates used, which were retrieved from the Office of National Statistics (ONS) website. Further details on how patient organisation data were cleaned and coded, please see the Supplemental Materials . Please note that the number of pharmaceutical companies and patient organisations making and receiving payments across the study period refers to companies and organisations that made or received at least one payment, respectively.

14 **Table 2. Volume and value of payments by company interests in 2020**

15

16

17

18

19

20

21

22

23

24

25

| PO type  | Company's interest | Volume; n (%) | Value: £          |
|----------|--------------------|---------------|-------------------|
| Overall† | Definitely yes     | 678 (48%)     | £12,529,514 (56%) |
|          | Probably yes       | 525 (37%)     | £7,700,069 (34%)  |
|          | No*                | 219 (15%)     | £2,347,732 (10%)  |
| Rare     | Definitely yes     | 161 (56%)     | £3,119,217 (67%)  |
|          | Probably yes       | 115 (40%)     | £1,388,545 (30%)  |
|          | No*                | 10 (4%)       | £122,017 (3%)     |
| Non-rare | Definitely yes     | 517 (54%)     | £9,410,297 (59%)  |
|          | Probably yes       | 389 (41%)     | £6,056,915 (38%)  |
|          | No*                | 46 (5%)       | £408,449 (3%)     |

26

27

28

29

30

31

32

33

34

35

36

37

38

39

40

41

42

43

44

45

46

1  
2  
3  
4  
5  
6  
7  
8  
9  
10  
11  
12  
13  
14  
15  
16  
17  
18  
19  
20  
21  
22  
23  
24  
25  
26  
27  
28  
29  
30  
31  
32  
33  
34  
35  
36  
37  
38  
39  
40  
41  
42  
43  
44  
45  
46

1 Notes: *Definitely yes* indicates payments directed to patient organisations that operated in a disease area (ICD-11 level 4 or higher) for which the company has a product in its  
 2 portfolio or pipeline. *Probably yes* indicates directed to patient organisations that operated in a disease area (ICD-11 level 3 or lower) for which the company has a product in  
 3 its portfolio or pipeline. *No* refers to directed to patient organisations that operated in a disease area for which no link could be found to the company’s portfolio or pipeline.  
 4 The higher the ICD-11, the more specific the condition. For example, if the ICD-11 level 4 is *Plasma cell neoplasms*, level 2 would be *Neoplasms of hematopoietic or lymphoid*  
 5 *tissues*. Further details on how this variable was constructed can be found in the Supplemental Material.  
 6 \*Please note that the *No* category of interest conservatively includes also interests that were considered as unclear.  
 7 †Please note that the *Overall* results are not a sum of the *Rare* and *Non-rare* results, as they also include patient organisations that could not be classified in either group and  
 8 are non-disease-specific.

For peer review only

### 1 **Industry funding of patient organisations focusing on rare vs. non-rare conditions**

2 Of the £22.6 million in payments from industry to patient organisations, £4.6 million (21%;  
3 n=286) were directed to organisations focusing on rare diseases while £15.9 million (70%;  
4 n=952) to organisations supporting non-rare conditions. The remaining 9% was directed to  
5 non-disease-specific patient organisations, which were excluded from this analysis. Linking  
6 these results to *Hypothesis 2*, we observe that patient organisations supporting rare diseases  
7 received less but still substantial funding.

8 The most funded patient organisation overall in 2020 was the European Association for the  
9 Study of Obesity, receiving almost £1.5 million, followed by Epilepsy Society (£955,600) and  
10 Shift.MS (£588,451). Among the top ten recipients overall in 2020, only one focused on rare  
11 diseases (Cystic Fibrosis Trust). However, it is worth noting that Blood Cancer UK, which  
12 focuses on malignant haematological malignancies including rare cancers, ranked seventh on  
13 the list.<sup>41</sup> The Cystic Fibrosis Trust (£445,229), The Society for Mucopolysaccharide Diseases  
14 (£358,037), and the International Patient Organisation for Primary Immunodeficiencies  
15 (£345,914) were the top three recipients focusing on rare diseases, followed by Myeloma UK  
16 with a slightly lower amount (£340,604).

17 Figure 3 shows therapeutic areas in order from most to least funded, broken down by rarity of  
18 disease targeted. In the case of organisations focusing on rare diseases, *endocrine, nutritional*  
19 *or metabolic disease, neoplasms and diseases of the nervous system* received most funds.  
20 Together, the top three most funded disease areas represented about half of overall funding  
21 (57%). When looking at the non-rare conditions that attracted most funding, multiple sclerosis  
22 was first (£1.7 million), followed by diabetes (£1.4 million) and epilepsy (£1 million). Cystic  
23 fibrosis, primary immunodeficiencies, and lysosomal storage diseases, which include rare  
24 metabolic disorders such as Fabry and Gaucher diseases, received the highest funding overall,  
25 attracting £445,229, £363,998 and £358,037, respectively.

### 1 **Industry funding concentration**

2 Each patient organisation received payments from a median of approximately one unique  
3 company, with 1 (IQR:1-2) and 2 (IQR:1-3) companies funding patient organisations targeting  
4 rare and non-rare diseases, respectively. However, this difference was not statistically  
5 significant ( $z = 1.582$ ,  $p\text{-value} = 0.114$ ). Overall, the range of unique companies making  
6 payments to a unique patient organisation spanned from a minimum of 1 to a maximum of 13.  
7 The latter was recorded for Genetic Alliance UK, a national charity and an alliance of over 200  
8 patient organisations, supporting those affected by rare genetic conditions.

9 In our sample, the median yearly payment of a company to a patient organisation comprised  
10 24% of the its overall industry payments (IQR: 9.5%-74%). When looking at patient  
11 organisations focusing on rare diseases, the median company contribution was as high as 30%  
12 (IQR: 11.6%-93%) versus 23% (IQR: 9.4%-65.8%) for non-rare conditions ( $z = -2.164$ ,  $p\text{-value}$   
13  $= 0.031$ ).

14 Finally, the share of industry funding comprised by the single highest payment per organisation  
15 amounted to an average of 67.5% (SD: 0.30) for all years, ranging from a minimum of 8.5% to  
16 a maximum of 100%. The highest value payment in the case of patient organisations targeting  
17 rare diseases made up a larger share of the overall industry funding (median: 71%, IQR: 43.5%-  
18 100%), despite not significant, compared to those focusing on more prevalent conditions  
19 (median: 62.5%, IQR: 34.7%-100%). While there was not a significant difference in the  
20 number of funding companies between patient organisations supporting rare and non-rare  
21 diseases ( $z = -1.087$ ,  $p\text{-value} = 0.277$ ) as stated in *Hypothesis 3*, the former relied on larger  
22 payments. Histograms illustrating the distribution of the statistics explored in this analysis can  
23 be found in the Supplemental Materials.



## Discussion

In this study, we evaluated the financial links between the pharmaceutical industry and patient organisations in the UK in 2020. This is the first study to document the almost-perfect concordance of pharmaceutical company interests and patient organisation funding in the UK. Almost all industry payments during our study period – in terms of both volume (85%) and value (90%) – were to patient organisations aligned with pharmaceutical companies' portfolios and pipelines. This share was even higher when considering only disease-specific patient organisations (97%). Despite rare diseases affecting less than 5% of the UK population, more than 20% of industry funding to patient organisations in 2020 was directed towards organisations focusing on such conditions (£4.6 million / £22.6 million). Finally, we found that patient organisations targeting rare diseases relied on payments from fewer companies but of higher value compared to organisations focusing on non-rare diseases.

The almost-perfect concordance between industry interests and patient organisation activities likely reflect the commercial attractiveness of conditions targeted by pharmaceutical companies.<sup>2 42</sup> Such close alignment between the interests of companies and patient organisations might undermine the credibility of patient organisations as perceived by the general public and might raise questions about patient organisations' inputs in regulatory and health technology appraisals.<sup>9 43 44</sup> Similarly, a study found that during NICE appraisal meetings fewer than 25% of all relevant financial ties between patient organisations and pharmaceutical companies were disclosed.<sup>45</sup> As discussed by the Mandeville and colleagues, this lack of transparency increases the risk of conflicts of interest not being properly detected and managed.

Our findings make an important contribution to the existing body of literature on industry funding of patient organisations. Ozieranski et al found that industry donated over £57 million to UK patient organisations from 2012 to 2016, an average of £11.5 million per year.<sup>2</sup> The authors also observed that payments were concentrated in commercially attractive therapeutic areas, with organisations focusing on cancer receiving more than 36% of overall payments.<sup>2</sup> However, the study did not examine whether companies were more likely to fund organisations that target diseases for which they have already developed or are currently developing products. Another earlier study examined payments to Swedish patient organisations and found an association between drug commercialisation and industry funding.<sup>10</sup> The authors did not take into account products in the companies' pipelines nor drugs that might not yet have been launched in Sweden. Considering that patient organisations have an important role not only in the post-commercialisation phase but also in the R&D and approval stages. We therefore developed a replicable classification model to determine whether payments from companies were directed at organisations that were aligned with their portfolios and pipelines.

Patient organisations focusing on rare diseases can drive both supply of and demand for medicinal products due to their research, advocacy and education role.<sup>4 46</sup> As a result of their close ties with patients, these organisations have the credibility and power to educate patient communities, advocate for access to available therapies and raise awareness on the unmet need of certain conditions.<sup>4 20 47</sup> Although a large share of both the value and number of payments were directed to patient organisations focusing on rare diseases, most funds targeted

1  
2  
3 1 commercially attractive rare conditions, such as multiple myeloma and cystic fibrosis, where  
4 2 the unmet need is relatively low compared to other rare conditions. These are diseases that have  
5 3 relatively high prevalence and for which 10 and 29 treatments, respectively, are currently  
6 4 approved for use in Europe.<sup>34 48</sup> Furthermore, rare diseases have proved a lucrative asset for  
7 5 pharmaceutical companies.<sup>42</sup> The additional market protection granted to orphan-designated  
8 6 product and the often higher willingness to pay from payers has led companies to increasingly  
9 7 focus on these medicines, which can offer a high return on investment.<sup>27 28</sup> This poses the risk  
10 8 of widening already existing health inequities, where severe and debilitating rare conditions  
11 9 that affect a small number of patients do not receive the resources they need and have to rely  
12 10 on limited public grants.<sup>49</sup>

11 11 Finally, our analysis showed that patient organisations focusing on rare diseases are funded by  
12 12 very few companies, relying on a single payment for over 70% of their industry-reported  
13 13 income. Despite the share of industry contributions among the overall patient organisation's  
14 14 income was found to be low in the literature,<sup>11</sup> this increases the risk of pursuing the company's  
15 15 commercial interests rather than objectively representing a patient body.<sup>12</sup> In this study we  
16 16 find that patient organisation received payments from a median of approximately one unique  
17 17 company (IRQ:1-3), ranging from 1 to a maximum of 13. This corresponds to an average of  
18 18 2.6 (SD:2.3) funding companies per patient organisation. This is consistent with findings from  
19 19 a recent study investigating the distribution of payments from industry to Danish patient  
20 20 organisations, which found that on average, most organisations were funded by 2.6 (SD:2.1)  
21 21 on average.<sup>15</sup>

22 22 These findings have important implications for policy and practice. To minimise conflicts of  
23 23 interests and maintain the integrity of patient organisations, particular attention should be paid  
24 24 to funding from companies in the period before or after a patient organisation has endorsed this  
25 25 company's product.<sup>45</sup> However, the duration of this period should be carefully evaluated to  
26 26 avoid overlooking more historical commercial ties.<sup>50</sup> One way of avoiding potential conflicts  
27 27 of interest is through increased transparency. Despite considerable progress on this front,  
28 28 especially in terms of reporting the monetary value of industry payments, there are still gaps in  
29 29 reporting.<sup>51</sup>

30 30 As highlighted in this and other studies, several companies misreport their payments to patient  
31 31 organisations.<sup>16</sup> Our study found that only 32% of companies disclose all of their payments  
32 32 correctly (i.e., on their website), while the rest report them on both their websites and the  
33 33 Disclosure UK HCOs database (49%) or solely on the latter (19%). This duplication of  
34 34 reporting efforts makes it harder to achieve transparency and obtain a comprehensive overview  
35 35 of the financial relationships between companies and patient organisations. Therefore, efforts  
36 36 should be made to establish a unique repository for payments to patient organisations, similar  
37 37 to the one currently in place for physicians and healthcare organisations.

38 38 Furthermore, the financial independence of patient organisations is fundamental to ensure that  
39 39 patients' interests are at the forefront of the organisations' agenda.<sup>52</sup> Compromising this  
40 40 independence can have a detrimental effect and distort public health priorities. For example,  
41 41 AbbVie-sponsored patient organisations were found to strongly oppose switching to  
42 42 biosimilars for Humira, the company's blockbuster drug, in various countries.<sup>15</sup> Similarly, a

1 recent investigation uncovered strong financial connections between Novo Nordisk and UK-  
2 based patient organisations that supported the approval of the company's latest obesity drug.  
3 This, alongside other ongoing investigations, culminated in the suspension of the company  
4 from ABPI.<sup>53</sup> The strong financial ties between Novo Nordisk and patient organisations,  
5 contributing to the NICE appraisal of the company's drug, raises serious concerns about these  
6 groups' independence and might ultimately harm patients.<sup>50</sup> Notably, our analysis found Novo  
7 Nordisk to be the second highest funder of patient organisations in term of value in 2020 for  
8 an amount of more than £1.8 million. In the long term, policymakers should make sure that  
9 patient organisations receive adequate public funding regardless of whether they focus on  
10 conditions that are profitable for the industry. Such public funding is particularly important for  
11 patient organisations supporting rare diseases, as relatively few companies have financial links  
12 with patient organisations focusing on rare diseases, potentially creating high reliance on few  
13 high-value payments.

14 This study had limitations. First, the lack of mandatory reporting of payments to patient  
15 organisations by companies that do not comply with the ABPI Code is a major limitation of  
16 our analysis.<sup>54</sup> For example, our dataset does not include payments by Vertex, a company with  
17 a rare-focused portfolio and a strong presence in cystic fibrosis.<sup>55</sup> Even for companies that are  
18 signatories of the ABPI Code, underreporting of payments to patient organisations and removal  
19 of disclosure reports from the public domain has been observed.<sup>13 56 57</sup> Second, in our  
20 assessment of company interests, we made a conservative assumption that only patient  
21 organisations which target relatively narrow conditions were eligible to be coded as *definitely*  
22 *yes*. Despite this assumption, we concluded that more than half of payments were in therapeutic  
23 areas in which companies had a clear interest. Finally, our analysis focused on a recent though  
24 limited time period. While previous publications show similar trends in terms of the most  
25 funded diseases and absolute value of payments,<sup>2 10</sup> lending credibility to our analysis and  
26 underlying data, it is still unclear whether these trends hold over time and their generalisability  
27 to other periods.

28 There are several avenues which can be explored further to build on this analysis. While some  
29 of the previous literature on the topic has focused on the financial dependency of patient  
30 organisations' budgets from pharmaceutical funding,<sup>11</sup> whether this differs depending on the  
31 rarity of the disease targeted has not been explored. Due to the small number of patients  
32 affected by rare conditions, patient organisations that target such conditions may be less well-  
33 equipped to finance their activities via charitable events and may rely more heavily on  
34 contributions from pharmaceutical companies. Lastly, while our analysis did not evaluate the  
35 effect of Covid-19 on the financial dynamics between pharmaceutical companies and patient  
36 organisations, we expect that the pandemic had a substantial effect on the type, value and  
37 distribution of payments. Future research should examine the impact of Covid-19 on industry  
38 funding of patient organisations.

## 39 **Conclusions**

40 Almost all industry funding of UK patient organisations in 2020 was in areas that were aligned  
41 with companies' approved drug portfolios and research and development pipelines.

1  
2  
3  
4  
5  
6  
7  
8  
9  
10  
11  
12  
13  
14  
15  
16  
17  
18  
19  
20  
21  
22  
23  
24  
25  
26  
27  
28  
29  
30  
31  
32  
33  
34  
35  
36  
37  
38  
39  
40  
41  
42  
43  
44  
45  
46  
47  
48  
49  
50  
51  
52  
53  
54  
55  
56  
57  
58  
59  
60

- 1 Pharmaceutical companies spent a larger amount on patient organisations focusing on rare
- 2 diseases and these organisations relied on a small of companies for their funding.

For peer review only

1  
2  
3  
4  
5  
6  
7  
8  
9  
10  
11  
12  
13  
14  
15  
16  
17  
18  
19  
20  
21  
22  
23  
24  
25  
26  
27  
28  
29  
30  
31  
32  
33  
34  
35  
36  
37  
38  
39  
40  
41  
42  
43  
44  
45  
46  
47  
48  
49  
50  
51  
52  
53  
54  
55  
56  
57  
58  
59  
60

1 **Acknowledgements:** We thank Dr Huseyin Naci and Dr Olivier Wouters, both from the  
2 Department of Health Policy at the London School of Economics and Political Science, for  
3 providing comments on earlier drafts of this paper. We also acknowledge Dr Mylene Lagarde  
4 and Dr Panos Kanavos for the support provided when finalising the manuscript.

5 **Contributors:** AG developed a preliminary version of the study and developed it further with  
6 IP. AG collected the data. AG and IP did the analysis, wrote and reviewed the manuscript. Both  
7 authors had full access to all of the data (including statistical reports and tables) in the study  
8 and can take responsibility for the integrity of the data and the accuracy of the data analysis.  
9 The corresponding author attests that all listed authors meet authorship criteria and that no  
10 others meeting the criteria have been omitted. AG is the guarantor.

11 **Funding:** This research received no specific grant from any funding agency in the public,  
12 commercial or not-for-profit sectors. AG is funded by the ESRC for her doctoral research  
13 (Project reference: 2480077) and is employed by Imperial College London. IP is funded by the  
14 ESRC for her doctoral research (Project reference: 2311285) and is employed by Imperial  
15 College London.

16 **Competing interest statement:** No competing interest.

17 **Ethical approval:** This study does not involve human participants and ethical approval was  
18 not required.

19 **Data sharing:** Extra data can be accessed via the Dryad data repository at <http://datadryad.org/> with  
20 the doi: 10.5061/dryad.fqz612jxd

21 **Transparency declaration:** The lead author affirms that the manuscript is an honest, accurate,  
22 and transparent account of the study being reported; that no important aspects of the study have  
23 been omitted; and that any discrepancies from the study as planned (and, if relevant, registered)  
24 have been explained.

25 The Corresponding Author has the right to grant on behalf of all authors and does grant on  
26 behalf of all authors, an exclusive licence (or non-exclusive for government employees) on a  
27 worldwide basis to the BMJ Publishing Group Ltd to permit this article (if accepted) to be  
28 published in BMJ editions and any other BMJ PGL products and sublicences such use and  
29 exploit all subsidiary rights, as set out in our licence.

## References

1. EFPIA. EFPIA Code of Practice on the Relationships between the Pharmaceutical Industry and Patient Organisations: European Federation of Pharmaceutical Industries and Associations, 2011.
2. Ozieranski P, Rickard E, Mulinari, Shai. Exposing drug industry funding of UK patient organisations. *BMJ* 2019;365:l1806. doi: 10.1136/bmj.l1806
3. Polich GR. Rare disease patient groups as clinical researchers. *Drug Discovery Today* 2012;17(3):167-72. doi: <https://doi.org/10.1016/j.drudis.2011.09.020>
4. Geissler J, Ryll B, di Priolo SL, et al. Improving Patient Involvement in Medicines Research and Development::A Practical Roadmap. *Therapeutic Innovation & Regulatory Science* 2017;51(5):612-19. doi: 10.1177/2168479017706405
5. MHRA. Patient Involvement Strategy 2021-25: Medicines and Healthcare products Regulatory Agency 2020.
6. MHRA. Putting patients first: A new era for our agency. Delivery Plan 2021-2023: Medicines and Healthcare products Regulatory Agency 2020.
7. NICE. Public Involvement Programme - Overview of technology appraisals: A factsheet for patient and carer organisations: National Institute for Health and Care Excellence, 2014
8. Fabbri A, Parker L, Colombo C, et al. Industry funding of patient and health consumer organisations: systematic review with meta-analysis. *BMJ* 2020;368:l6925. doi: 10.1136/bmj.l6925
9. Rose SL, Highland J, Karafa MT, et al. Patient Advocacy Organizations, Industry Funding, and Conflicts of Interest. *JAMA Intern Med* 2017;177(3):344-50. doi: 10.1001/jamainternmed.2016.8443
10. Mulinari S, Vilhelmsson A, Rickard E, et al. Five years of pharmaceutical industry funding of patient organisations in Sweden: Cross-sectional study of companies, patient organisations and drugs. *PLoS One* 2020;15(6):e0235021. doi: 10.1371/journal.pone.0235021 [published Online First: 20200624]
11. Ozieranski P, Pitter JG, Rickard E, et al. A 'patient-industry complex'? Investigating the financial dependency of UK patient organisations on drug company funding. *Sociol Health Illn* 2022;44(1):188-210. doi: 10.1111/1467-9566.13409 [published Online First: 20211207]
12. Rose SL. Patient advocacy organizations: institutional conflicts of interest, trust, and trustworthiness. 2014(1748-720X (Electronic))
13. Lexchin J, Batt S, Goldberg D, et al. National patient groups in Canada and their disclosure of relationships with pharmaceutical companies: a cross-sectional study. *BMJ Open* 2022;12(3):e055287. doi: 10.1136/bmjopen-2021-055287
14. Parker L, Fabbri A, Grundy Q, et al. "Asset exchange"—interactions between patient groups and pharmaceutical industry: Australian qualitative study. *BMJ* 2019;367:l6694. doi: 10.1136/bmj.l6694
15. Mulinari S, Pashley D, Ozieranski P. Advancing international comparison of pharmaceutical industry funding of patient advocacy: Focus on Denmark. *Health Policy* 2022;126(12):1256-62. doi: <https://doi.org/10.1016/j.healthpol.2022.11.003>
16. Rickard E, Carmel E, Ozieranski P. Comparing pharmaceutical company payments in the four UK countries: a cross-sectional and social network analysis. *BMJ Open* 2023;13(3):e061591. doi: 10.1136/bmjopen-2022-061591
17. Wouters OJ, McKee M, Luyten J. Estimated Research and Development Investment Needed to Bring a New Medicine to Market, 2009-2018. 2020(1538-3598 (Electronic))
18. European Commission. Regulation (EC) No 141/2000 of the European Parliament and of the Council of 16 December 1999 on Orphan Medicinal Products, 2000.
19. Department of Health & Social Care. Policy Paper - The UK Rare Diseases Framework 2021 [Available from: <https://www.gov.uk/government/publications/uk-rare-diseases-framework/the-uk-rare-diseases-framework>].
20. Aymé S, Kole A, Groft S. Empowerment of patients: lessons from the rare diseases community. *Lancet* 2008;371(9629):2048-51. doi: 10.1016/s0140-6736(08)60875-2

- 1 21. Gamba S, Magazzini L, Pertile P. R&D and market size: Who benefits from orphan drug  
2 legislation? *Journal of Health Economics* 2021;80:102522. doi:  
3 <https://doi.org/10.1016/j.jhealeco.2021.102522>
- 4 22. Waxman HA. The Waxman Report : How Congress Really Works: First edition. New York :  
5 Twelve, 2009. 2009.
- 6 23. Office of the Federal Register NAaRA. Orphan Drug Act - 6 Stat. 2049. In: Office. USGP, ed.,  
7 1983.
- 8 24. Halley MC. From "Ought" to "Is": Surfacing Values in Patient and Family Advocacy in Rare  
9 Diseases. 2021(1536-0075 (Electronic))
- 10 25. Dunkle M, Pines W, Saltonstall PL. Advocacy Groups and Their Role in Rare Diseases Research.  
11 In: Posada de la Paz M, Groft SC, eds. Rare Diseases Epidemiology. Dordrecht: Springer  
12 Netherlands 2010:515-25.
- 13 26. Scottish Medicines Consortium. Patient and Clinician Engagement (PACE) process [Available  
14 from: <https://www.scottishmedicines.org.uk/how-we-decide/pace/2023>.
- 15 27. Côté A, Keating B. What Is Wrong with Orphan Drug Policies? *Value in Health* 2012;15(8):1185-  
16 91. doi: <https://doi.org/10.1016/j.jval.2012.09.004>
- 17 28. Igho JO, Elizabeth AS, Matthew JT, et al. Effectiveness, safety and costs of orphan drugs: an  
18 evidence-based review. *BMJ Open* 2015;5(6):e007199. doi: 10.1136/bmjopen-2014-007199
- 19 29. Disclosure UK. ABPI Patient Organisations database 2021 [Available from:  
20 <https://search.disclosureuk.org.uk/>.
- 21 30. PMCPA. ABPI Code of Practice 2021 [Available from: [https://www.pmcpa.org.uk/the-  
22 code/2021-interactive-abpi-code-of-practice/](https://www.pmcpa.org.uk/the-code/2021-interactive-abpi-code-of-practice/).
- 23 31. Disclosure UK. ABPI Patient Organisations database 2021 [Available from:  
24 <https://search.disclosureuk.org.uk/2020>.
- 25 32. HMRC. HMRC yearly average and spot rates: HM Revenue and Customs; [Available from:  
26 <https://www.gov.uk/government/publications/exchange-rates-for-customs-and-vat-yearly>.
- 27 33. HMRC. HMRC yearly average and spot rates: HM Revenue and Customs; 2022 [Available from:  
28 <https://www.gov.uk/government/publications/exchange-rates-for-customs-and-vat-yearly>.
- 29 34. Orphanet. The portal for rare diseases and orphan drugs 2022 [Available from:  
30 [https://www.orpha.net/consor/cgi-bin/Disease\\_Search\\_Simple.php?lng=EN](https://www.orpha.net/consor/cgi-bin/Disease_Search_Simple.php?lng=EN).
- 31 35. Rothman SM, Raveis VH, Friedman A, et al. Health Advocacy Organizations and the  
32 Pharmaceutical Industry: An Analysis of Disclosure Practices. *American Journal of Public  
33 Health* 2011;101(4):602-09. doi: 10.2105/AJPH.2010.300027
- 34 36. European Medicines Agency. Criteria to be fulfilled by patient, consumer and healthcare  
35 professional organisations involved in European Medicines Agency (EMA) activities 2018  
36 [Available from: [https://www.ema.europa.eu/en/documents/regulatory-procedural-  
37 guideline/criteria-be-fulfilled-patient-consumer-healthcare-professional-organisations-  
38 involved-european\\_en.pdf](https://www.ema.europa.eu/en/documents/regulatory-procedural-guideline/criteria-be-fulfilled-patient-consumer-healthcare-professional-organisations-involved-european_en.pdf).
- 39 37. NICE. Policy on declaring and managing interests for NICE advisory committees, 2018.
- 40 38. WHO. ICD-11 for Mortality and Morbidity Statistics 2022 [Available from:  
41 <https://icd.who.int/browse11/1-m/en#/http://id.who.int/icd/entity/465177735?view=G0>.
- 42 39. NIH U.S. National Library of Medicine. ClinicalTrials.gov [Available from:  
43 <https://clinicaltrials.gov/2022>.
- 44 40. Ozieranski P, Csanadi M, Rickard E, et al. Analysis of Pharmaceutical Industry Payments to UK  
45 Health Care Organizations in 2015. 2019(2574-3805 (Electronic))
- 46 41. Blood Cancer UK. Blood cancer types [Available from:  
47 <https://bloodcancer.org.uk/understanding-blood-cancer/blood-cancer-types/2023>.
- 48 42. Hughes DA, Poletti-Hughes J. Profitability and Market Value of Orphan Drug Companies: A  
49 Retrospective, Propensity-Matched Case-Control Study. 2016(1932-6203 (Electronic))
- 50 43. McCoy MS, Carniol M, Chockley K, et al. Conflicts of Interest for Patient-Advocacy  
51 Organizations. *New England Journal of Medicine* 2017;376(9):880-85. doi:  
52 10.1056/NEJMSr1610625
- 53 44. Jones K. In whose interest? Relationships between health consumer groups and the  
54 pharmaceutical industry in the UK. 2008(1467-9566 (Electronic))

- 1  
2  
3 1 45. Mandeville KL, Barker R, Packham A, et al. Financial interests of patient organisations  
4 2 contributing to technology assessment at England's National Institute for Health and Care  
5 3 Excellence: policy review. *BMJ* 2019;364:k5300. doi: 10.1136/bmj.k5300  
6 4 46. Mavris M, Le Cam Y. Involvement of patient organisations in research and development of  
7 5 orphan drugs for rare diseases in europe. 2012(1661-8769 (Print))  
8 6 47. Bedlington N, Geissler J, Houyez F, et al. Role of Patient Organisations. In: Facey KM, Ploug  
9 7 Hansen H, Single ANV, eds. Patient Involvement in Health Technology Assessment.  
10 8 Singapore: Springer Singapore 2017:401-10.  
11 9 48. European Medicines Agency. European public assessment reports (EPAR), 2022.  
12 10 49. Baggott R, Jones K. The Big Society in an age of austerity: threats and opportunities for Health  
13 11 Consumer and Patients' Organizations in England. 2015(1369-7625 (Electronic))  
14 12 50. Parvanova I, Gentilini A, Cushing J, et al. Safeguarding NICE from patient groups' conflicts of  
15 13 interest. *BMJ* 2023;381:p1243. doi: 10.1136/bmj.p1243  
16 14 51. Lexchin J. Association between commercial funding of Canadian patient groups and their views  
17 15 about funding of medicines: An observational study. *PLOS ONE* 2019;14(2):e0212399. doi:  
18 16 10.1371/journal.pone.0212399  
19 17 52. McCoy MS, Emanuel EJ. Why There Are No "Potential" Conflicts of Interest. *JAMA*  
20 18 2017;317(17):1721-22. doi: 10.1001/jama.2017.2308  
21 19 53. Das S, Ungeod-Thomas J. Revealed: experts who praised new 'skinny jab' received payments  
22 20 from drug maker. *The Guardian* 2023.  
23 21 54. Ozieranski P, Martinon L, Jachiet P-A, et al. Accessibility and quality of drug company  
24 22 disclosures of payments to healthcare professionals and organisations in 37 countries: a  
25 23 European policy review. *BMJ Open* 2021;11(12):e053138. doi: 10.1136/bmjopen-2021-  
26 24 053138  
27 25 55. Vertex Pharmaceuticals Incorporated. Our Science [Available from: [https://www.vrtx.com/our-](https://www.vrtx.com/our-science/2023)  
28 26 [science/2023](https://www.vrtx.com/our-science/2023).  
29 27 56. Ozieranski P, Csanádi M, Rickard E, et al. Under-reported relationship: a comparative study of  
30 28 pharmaceutical industry and patient organisation payment disclosures in the UK (2012–2016).  
31 29 *BMJ Open* 2020;10(9):e037351. doi: 10.1136/bmjopen-2020-037351  
32 30 57. Colombo C, Mosconi P, Villani W, et al. Patient organizations' funding from pharmaceutical  
33 31 companies: is disclosure clear, complete and accessible to the public? An Italian survey. *PLoS*  
34 32 *One* 2012;7(5):e34974. doi: 10.1371/journal.pone.0034974 [published Online First:  
35 33 20120509]



1  
2  
3 **1 Figure legend**  
4

5 **2 Figure 1.** Classification model to determine company interests in patient organisation funding  
6  
7 **3 Note:** An interest is when there is, or could be perceived to be, an opportunity for a  
8  
9 **4 pharmaceutical company** to benefit in the disease area where the patient organisation operates.

10 **5 Figure 2.** Cumulative value of payments by receiving patient organisation type and funding  
11  
12 **6 company in 2020**

13 **7 Note:** Non-disease-specific patient organisations include organisations that could not be  
14  
15 **8 matched to specific ICD-11 codes** or could not be classified as rare or non-rare, such as hospital  
16  
17 **9 charities, carers organisations, and hospices.**

18 **10 Figure 3.** Cumulative value of payments by patient organisation type and therapeutic area  
19  
20 **11 from in 2020**

21 **12 Note:** Non-disease-specific patient organisations include organisations that could not be  
22  
23 **13 matched to specific ICD-11 codes** or could not be classified as rare or non-rare, such as hospital  
24  
25 **14 charities, carers organisations, and hospices.**

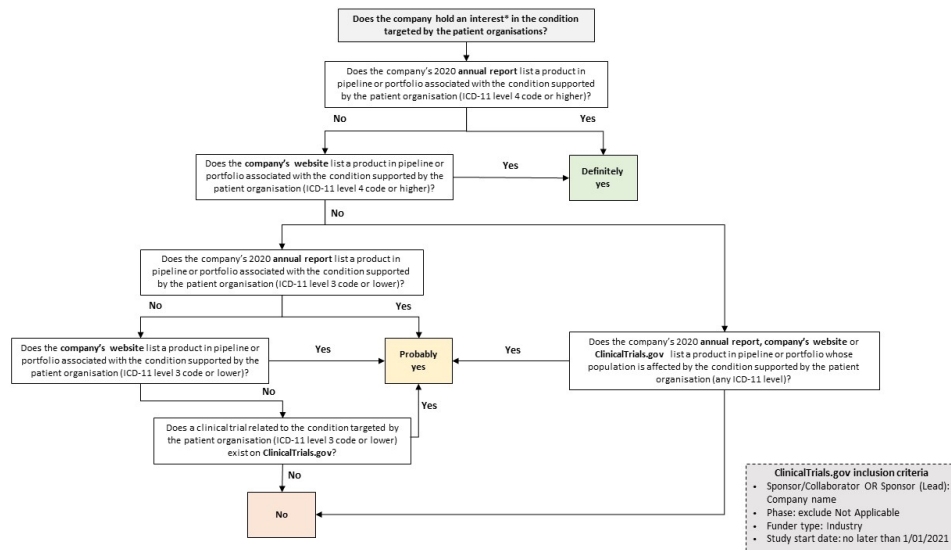

Caption: Classification model to determine company interests in patient organisation funding

Notes: An interest is when there is, or could be perceived to be, an opportunity for a pharmaceutical company to benefit in the disease area where the patient organisation operates.

338x190mm (96 x 96 DPI)

1  
2  
3  
4  
5  
6  
7  
8  
9  
10  
11  
12  
13  
14  
15  
16  
17  
18  
19  
20  
21  
22  
23  
24  
25  
26  
27  
28  
29  
30  
31  
32  
33  
34  
35  
36  
37  
38  
39  
40  
41  
42  
43  
44  
45  
46  
47  
48  
49  
50  
51  
52  
53  
54  
55  
56  
57  
58  
59  
60

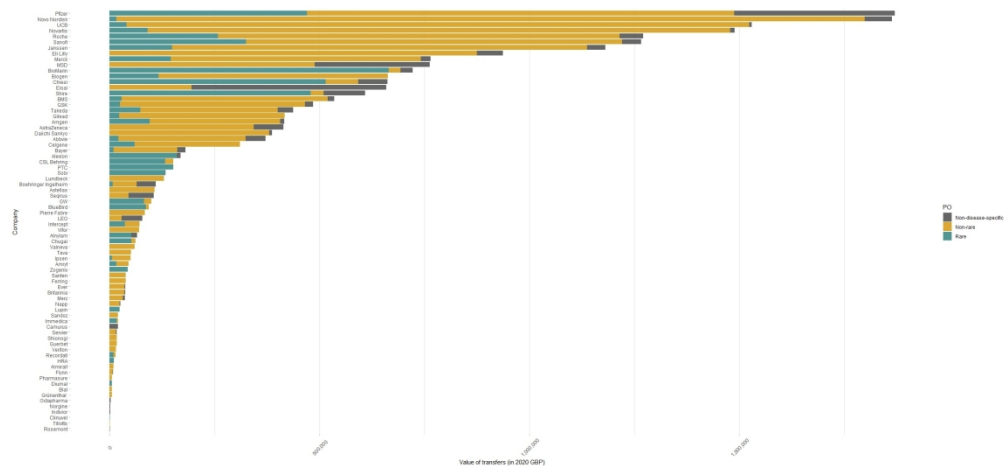

Cumulative value of payments by receiving patient organisation type and funding company in 2020

Note: Non-disease-specific patient organisations include organisations that could not be matched to specific ICD-11 codes or could not be classified as rare or non-rare, such as hospital charities, carers organisations, and hospices.

650x299mm (96 x 96 DPI)

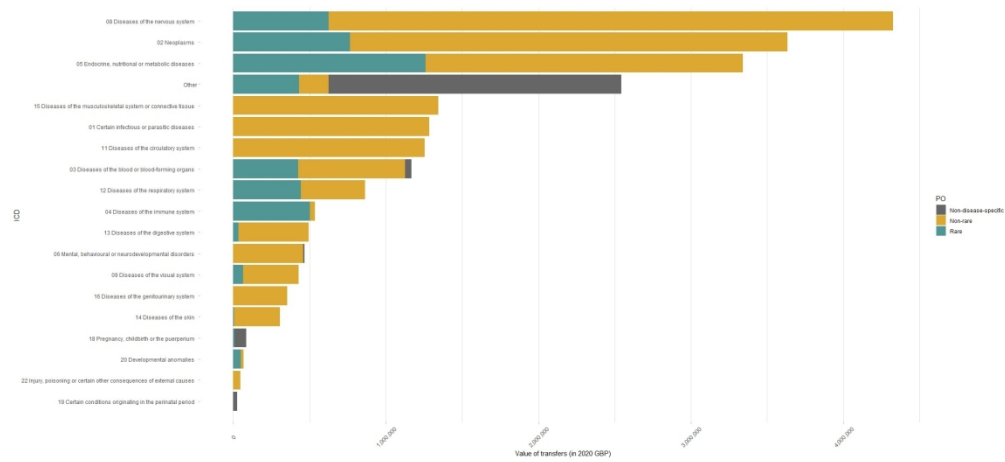

Cumulative value of payments by patient organisation type and therapeutic area from in 2020

Note: Non-disease-specific patient organisations include organisations that could not be matched to specific ICD-11 codes or could not be classified as rare or non-rare, such as hospital charities, carers organisations, and hospices.

581x264mm (96 x 96 DPI)

## Supplemental Material

### Data collection

#### Payments

We retrieved data on 2020 payments from pharmaceutical companies to patient organisations from the following sources:

- 1) **Companies' websites**. Disclosing payments to patient organisations is a requirement of Clause 29 of the Association of British Pharmaceutical Industry (ABPI) Code of Practice.<sup>1</sup> Specifically, the ABPI requires companies to keep a public record of any payment made to patient organisations on their website for a minimum of three years following the payment.<sup>1</sup> Therefore, companies' website were our primary data source on payments to patient organisations.
- 2) **Disclosure UK HCOs database**. In light of a recent study unveiling that payments to patient organisations were misreported in the Disclosure UK database of payments to healthcare organisations (HCOs),<sup>2</sup> we also screened the 2020 Disclosure UK HCOs database for payments to patient organisations.

If payments were not disclosed in the company's website nor in the Disclosure UK HCOs database, we assumed that the company did not make any payments to patient organisations in 2020, as commonly assumed in the literature.<sup>3</sup>

One investigator (AG) extracted payment disclosures from the companies' websites. These comprised the name of the patient organisation, the year when the payment was made, the reason for the payment and its value in the currency reported by the disclosing company. The 2020 Disclosure UK HCOs database was also screened, and recipients were matched to standardised patient organisations names. To ensure the data's accuracy, the final database was scanned for duplicates, but no such instances were found. When reported in different currencies, such as United States Dollars (USD), Swiss Franc (CHF), Swedish Krona (SEK), Norwegian Krone (NKK) and Danish Krone (DKK), the value of the payment was converted to Great British Pounds (GBP), using the ONS historical yearly conversion rates.<sup>4 5</sup> Two in-kind payments with a monetary value of zero were excluded from the analysis. Further details on variables' cleaning and coding can be found in the Supplemental Material.

#### **Therapeutic areas**

Patient organisations' websites were also screened to understand the condition(s) they focused on. For example, in the case of *Blood Cancer UK*, their mission is to "beat blood cancer", therefore, the condition supported was coded as blood cancer.

After being identified as described above, conditions were further classified into rare and non-rare.

1  
2  
3 1 Conditions were considered rare if they appeared in the Orphanet database of rare diseases  
4 2 regardless of their classification level (group of disorders, disorders or subtypes of disorders).<sup>6</sup>  
5 3 For example, multiple myeloma appears in the Orphanet database of rare diseases, therefore a  
6 4 patient organisation focusing this condition would be categorised as rare-focused. When  
7 5 condition sub-types appeared in the Orphanet database, the patient organisation's website was  
8 6 screened to check whether its focus was on rare conditions. For example, *Metabolic Support*  
9 7 *UK's* motto is "Your rare condition. Our common fight" and was therefore assumed to be rare  
10 8 disease-focused. Conversely, should a patient organisation focus on a broader condition such  
11 9 as blood cancer with no sole focus on rare conditions, the organisation would be conservatively  
12 10 considered non-rare. While this approach was preferred as it did not require further  
13 11 assumptions, it entails that only more specialised patient organisation are considered as rare.  
14 12 Such approach might have led to the number and overall value of payments from  
15 13 pharmaceutical companies to rare diseases-focused patient organisations being underestimated,  
16 14 as these organisations are expected to get less payments than more generalist ones (e.g. multiple  
17 15 myeloma vs blood cancer).

18 16 A third category (*unclear*) was created for non-disease-specific patient organisations, such as  
19 17 coalition of charities or organisations focused on palliative care for terminally ill patients. This  
20 18 category was excluded from the main analyses, but sub-group analyses are reported at the end  
21 19 of the Supplemental Material.

### 22 20 **Companies' interest**

23 21 We developed a methodology to assess the extent to which a pharmaceutical company holds  
24 22 an interest in the disease supported by a patient organisation. For the purpose of this analysis,  
25 23 we adapted the definition of interest provided by NICE.<sup>7</sup> An interest is when there is, or could  
26 24 be perceived to be, an opportunity for a pharmaceutical company to benefit in the disease area  
27 25 where the patient organisation operates. This could include situations where the pharmaceutical  
28 26 company has a drug developed or in development for a condition supported by the patient  
29 27 organisation, or where a drug in the company's portfolio or pipeline is restricted to a specific  
30 28 population affected by the disease supported by the patient organisation.

31 29 As first step, the conditions supported by patient organisations were translated into ICD-11  
32 30 codes using the online ICD-11 database.<sup>8</sup>

33 31 ICD-11 codes are mutually exclusive, exhaustive and are arranged as a single hierarchical tree.  
34 32 This means that specific diseases are nested within broader classifications. An example for  
35 33 multiple myeloma is shown in Table 1 below.

36 34  
37 35  
38 36  
39 37  
40 38  
41 39  
42 40  
43 41  
44 42  
45 43  
46 44  
47 45  
48 46  
49 47  
50 48  
51 49  
52 50  
53 51  
54 52  
55 53  
56 54  
57 55  
58 56  
59 57  
60 58

**Table 1. Example of ICD-11 classification, Multiple myeloma**

| Hierarchy level | Condition                                       | ICD-11 code |
|-----------------|-------------------------------------------------|-------------|
| Level 1         | Neoplasms                                       | 2           |
| Level 2         | Neoplasms of haematopoietic or lymphoid tissues | 2A          |
| Level 3         | Mature B-cell neoplasms                         | 2A8         |
| Level 4         | Plasma cell neoplasms                           | 2A83        |
| Level 5         | Plasma cell myeloma                             | 2A83.1      |

In this example, multiple myeloma is nested within *Plasma cell myeloma*, who is in its turn nested within *Plasma cell neoplasms* and so on up to *Neoplasms*.

Subsequently, companies' annual reports, website and the ClinicalTrials.gov database were searched to assess whether the each company had an interest in the condition supported by the patient organisation receiving the payment. The diagram in the main document (Figure 1) schematically illustrates the approach taken to understand whether the company definitely, probably or did not have an interest in the condition. Figure 1 below illustrates the source of companies' interests.

For example, if *Company X* reports in its annual report having a drug in development for multiple myeloma and transferred a sum of money to *Blood Cancer UK*, this would be coded as *probably yes*, as the company has a product in its pipeline or portfolio associated with a condition supported by the patient organisation. In this case, the ICD-11 level would be 2, *Neoplasms of haematopoietic or lymphoid tissue*, under which multiple myeloma is nested. Conversely, should *Company X* have made a payment to *Myeloma UK*, this would have been coded as *definitely yes*, as there is perfect alignment between the condition supported by the patient organisation and by *Company X's* drug.

Situations where a company's interest in a certain condition could not be identified indicate an impossibility of identifying such link, rather than the lack thereof.

**Figure 1. Source of companies interests**

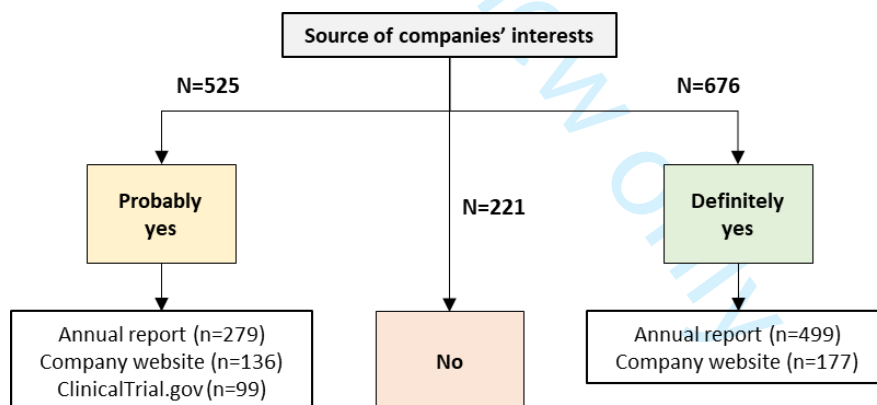

## 1 Variables cleaning and coding

2 Table 2. Description of key variables in payment database

| Variables name              | Description                                                                                 | Details                                                                                                                                                                                                                                                                                                                                                                                                                                                                                                                                                                                                                                                                                                                                                     |
|-----------------------------|---------------------------------------------------------------------------------------------|-------------------------------------------------------------------------------------------------------------------------------------------------------------------------------------------------------------------------------------------------------------------------------------------------------------------------------------------------------------------------------------------------------------------------------------------------------------------------------------------------------------------------------------------------------------------------------------------------------------------------------------------------------------------------------------------------------------------------------------------------------------|
| <b>Company</b>              | Standardised company name                                                                   | Company name as reported on company website and/or on HCOs database. Two mergers involving companies included in our analysis—BMS and Celgene, and Takeda and Shire—were completed prior to 2020. Although these companies had merged, we treated them as separate entities because their disclosures were reported separately even after the acquisition.                                                                                                                                                                                                                                                                                                                                                                                                  |
| <b>ABPI member</b>          | ABPI membership of company; <i>source: <a href="#">ABPI full members list</a></i>           | 0 = not ABPI member, 1 = ABPI member                                                                                                                                                                                                                                                                                                                                                                                                                                                                                                                                                                                                                                                                                                                        |
| <b>Company_condition</b>    | Concatenation of company name and disease area targeted by the patient organisation         | Concatenation used for coding and analysis purposes                                                                                                                                                                                                                                                                                                                                                                                                                                                                                                                                                                                                                                                                                                         |
| <b>Company interest</b>     | Whether the company hold an interest* in the condition targeted by the patient organisation | <ul style="list-style-type: none"> <li>- <b>Definitely yes:</b> the company's annual report or website list a product for the condition targeted by the patient organisation in its portfolio/pipeline (ICD-11 level 4 or above)</li> <li>- <b>Probably yes:</b> the company's annual report or website list a product for the condition targeted by the patient organisation in its portfolio/pipeline OR a clinical trial for which the company is sponsor is listed for the disease targeted by the patient organisation OR a drug in the company's pipeline/portfolio is restricted to a specific population affected by the disease targeted by the patient organisation (ICD-11 level 3 or below)</li> <li>- <b>No :</b> None of the above</li> </ul> |
| <b>Source</b>               | Source of company interest variable                                                         | Annual report, company website, ClinicalTrials.gov, none                                                                                                                                                                                                                                                                                                                                                                                                                                                                                                                                                                                                                                                                                                    |
| <b>Name of PO</b>           | Name of patient organization as reported by companies in disclosure report                  | -                                                                                                                                                                                                                                                                                                                                                                                                                                                                                                                                                                                                                                                                                                                                                           |
| <b>Standardised PO name</b> | Standardised name of patient organization to avoid duplicates and inconsistencies           | <p>For coding purposes, names of patient organisations were standardised. The following steps were taken:</p> <ol style="list-style-type: none"> <li>1. Patient organisations' names for typos, abbreviations, spelling mistakes and duplicated within the companies' disclosures (e.g. Crohn's &amp; Colitis UK and CCUK would both be standardized to Crohn's and Colitis UK);</li> <li>2. If the patient organisation changed name over time, the latest name on record was used;</li> </ol>                                                                                                                                                                                                                                                             |



|                                                   |                                                                                                                                                                                                                                                                |                                                                                                                                                                                                                                                                                                                                                                                                                                                                                                                                          |
|---------------------------------------------------|----------------------------------------------------------------------------------------------------------------------------------------------------------------------------------------------------------------------------------------------------------------|------------------------------------------------------------------------------------------------------------------------------------------------------------------------------------------------------------------------------------------------------------------------------------------------------------------------------------------------------------------------------------------------------------------------------------------------------------------------------------------------------------------------------------------|
|                                                   |                                                                                                                                                                                                                                                                | <p>3. If the two patient organisations merged over the study period, the name of the merged entity was used (e.g. the British Lung Foundation and Asthma UK merged into Asthma + Lung UK);</p> <p>4. Separate entries were made for patient organisations under the same umbrella but focusing on different geographical entities (e.g. Alzheimer UK vs Alzheimer Scotland)</p>                                                                                                                                                          |
| <b>Reason for exclusion</b>                       | Reason why the organisation was excluded from the analysis                                                                                                                                                                                                     | <ul style="list-style-type: none"> <li>- Not UK organisation (not aligned with geographical scope e.g. Irish, US-based);</li> <li>- For profit company (not aligned with definition of patient organization used in the study);</li> <li>- Missing information (organisations for whose nature is unclear i.e. patient organisation website could not be identified)</li> </ul>                                                                                                                                                          |
| <b>ICD-11</b>                                     | Classification of disease targeted by the patient organisation according to the WHO ICD-11; <i>source: <a href="#">ICD WHO website</a></i>                                                                                                                     | General classification (ICD-11 chapters)<br><i>See Excel file, Inputs tab</i>                                                                                                                                                                                                                                                                                                                                                                                                                                                            |
| <b>Condition</b>                                  | Condition targeted by patient organisation as reported on website                                                                                                                                                                                              | e.g. Blood Cancer UK would fall under ICD-11 code 02 Neoplasms, with <i>blood cancer</i> being the condition                                                                                                                                                                                                                                                                                                                                                                                                                             |
| <b>Charity number (if any)</b>                    | Charity number as reported in the organization website or as reported in the <a href="#">England and Wales Charity Commission website</a>                                                                                                                      | When both England/Wales and Scotland or Northern Ireland charity numbers were provided, the former was chosen. Scotland and Northern Ireland charity numbers were reported only when those for England/Wales were missing                                                                                                                                                                                                                                                                                                                |
| <b>Company number (if charity number missing)</b> | Company number as reported in the organization website or as reported in the <a href="#">Government Company Information Service website</a> if the patient organization cannot be found in the charity commission database (e.g. limited by guarantee company) | When both England/Wales and Scotland or Northern Ireland charity numbers were provided, the former was chosen. Scotland and Northern Ireland charity numbers were reported only when those for England/Wales were missing                                                                                                                                                                                                                                                                                                                |
| <b>Link</b>                                       | Link of patient organisation website                                                                                                                                                                                                                           | -                                                                                                                                                                                                                                                                                                                                                                                                                                                                                                                                        |
| <b>Rare disease</b>                               | Whether the condition or one of the conditions targeted by the patient organisation is considered as rare                                                                                                                                                      | <p>A condition was considered as rare if it under at least one of the following criteria:</p> <ol style="list-style-type: none"> <li>1. The condition is listed in <a href="#">Orphanet list of rare diseases</a> regardless of its ICD-11 level classification;</li> <li>2. In their website, the patient organisation explicitly describe the disease they target as rare (e.g. <i>Metabolic Support UK's</i> motto is “<i>Your rare condition. Our common fight</i>” and was therefore assumed to be rare disease-focused)</li> </ol> |

|                             |                                                                                     |                                                                                                           |
|-----------------------------|-------------------------------------------------------------------------------------|-----------------------------------------------------------------------------------------------------------|
| <b>Details of payment</b>   | Details of payment as reported by companies in disclosure report                    | -                                                                                                         |
| <b>Country</b>              | Country of payment                                                                  | The country considered for the entire database is the UK                                                  |
| <b>Year</b>                 | Year of payment                                                                     | 2020                                                                                                      |
| <b>Currency</b>             | Currency of payment                                                                 | Currency the payment is reported in the disclosure reports (i.e. EUR, GBP, USD, CHF, SEK, NKK)            |
| <b>Currency_year</b>        | Concatenation of currency and year of payment for conversion purposes               | -                                                                                                         |
| <b>Value of payment</b>     | Value of payment in original currency as reported by companies in disclosure report | In-kind payments were removed from the analysis as no monetary value could be associated to such payments |
| <b>Value in 2020 pounds</b> | GBP converted value of payment                                                      | See details in <i>Inputs</i> sheet                                                                        |

\*An interest is when there is, or could be perceived to be, an opportunity for a pharmaceutical company to benefit in the disease area where the patient organisation operates.

## 1 Disclosure details

2 **Table 3. Reporting of payments to patient organizations by pharmaceutical companies:**  
 3 **comparison of company websites and Disclosure UK HCOs database**

| Company              | Company website only | HCOs database only | Both |
|----------------------|----------------------|--------------------|------|
| Abbvie               | X                    |                    |      |
| Alexion              | X                    |                    |      |
| Almirall             | X                    |                    |      |
| Alnylam              |                      |                    | X    |
| Amgen                |                      |                    | X    |
| Amryt                | X                    |                    |      |
| Astellas             |                      |                    | X    |
| AstraZeneca          |                      |                    | X    |
| BMS                  |                      |                    | X    |
| Bayer                |                      |                    | X    |
| Bial                 |                      | X                  |      |
| BioMarin             |                      |                    | X    |
| Biogen               | X                    |                    |      |
| BlueBird             | X                    |                    |      |
| Boehringer Ingelheim |                      |                    | X    |
| Britannia            |                      |                    | X    |
| CSL Behring          | X                    |                    |      |
| Camurus              |                      |                    | X    |
| Celgene              |                      |                    | X    |
| Chiesi               |                      |                    | X    |
| Chugai               | X                    |                    |      |
| Clinuvel             | X                    |                    |      |
| Daiichi Sankyo       |                      |                    | X    |
| Diurnal              | X                    |                    |      |
| Eisai                |                      |                    | X    |
| Eli Lilly            |                      |                    | X    |
| Ever                 |                      |                    | X    |
| Ferring              |                      | X                  |      |
| Flynn                |                      | X                  |      |
| GSK                  |                      |                    | X    |
| GW                   |                      |                    | X    |
| Gilead               |                      | X                  |      |
| Grünenthal           |                      |                    | X    |
| Guerbet              |                      | X                  |      |
| HRA                  |                      | X                  |      |
| Immedica             | X                    |                    |      |
| Indivior             | X                    |                    |      |
| Intercept            | X                    |                    |      |
| Ipsen                |                      | X                  |      |
| Janssen              |                      |                    | X    |

|                    |         |         |         |
|--------------------|---------|---------|---------|
| LEO                | X       |         |         |
| Lundbeck           |         |         | X       |
| Lupin              | X       |         |         |
| MSD                |         |         | X       |
| Merck              |         |         | X       |
| Merz               |         |         | X       |
| Napp               |         |         | X       |
| Norgine            |         | X       |         |
| Novartis           |         |         | X       |
| Novo Nordisk       |         |         | X       |
| Octapharma         |         | X       |         |
| PTC                | X       |         |         |
| Pfizer             |         |         | X       |
| Pharmasure         |         | X       |         |
| Pierre Fabre       |         |         | X       |
| Recordati          | X       |         |         |
| Roche              |         |         | X       |
| Rosemont           |         |         | X       |
| Sandoz             |         | X       |         |
| Sanofi             |         |         | X       |
| Santen             | X       |         |         |
| Seqirus            | X       |         |         |
| Servier            | X       |         |         |
| Shionogi           |         | X       |         |
| Shire              |         |         | X       |
| Sobi               | X       |         |         |
| Takeda             |         |         | X       |
| Teva               |         | X       |         |
| Tillotts           | X       |         |         |
| UCB                |         |         | X       |
| Valneva            | X       |         |         |
| Veriton            |         | X       |         |
| Vifor              |         |         | X       |
| Zogenix            | X       |         |         |
| <b>Total (n;%)</b> | 24; 32% | 14; 19% | 36; 49% |

**Table 4. Reporting of payments to patient organizations by pharmaceutical companies: payments disclosed on company websites and Disclosure UK HCOs database**

| Company  | Payments reported on company website (£) | Payments reported on HCOs database (£) | Total     |
|----------|------------------------------------------|----------------------------------------|-----------|
| Abbvie   | £ 371,503                                | £ -                                    | £ 371,503 |
| Alexion  | £ 168,925                                | £ -                                    | £ 168,925 |
| Almirall | £ 9,775                                  | £ -                                    | £ 9,775   |
| Alnylam  | £ 51,559                                 | £ 14,050                               | £ 65,609  |
| Amgen    | £ 347,757                                | £ 68,845                               | £ 416,602 |

|                                 |   |           |   |           |   |           |
|---------------------------------|---|-----------|---|-----------|---|-----------|
| <b>Amryt</b>                    | £ | 45,413    | £ | -         | £ | 45,413    |
| <b>Astellas</b>                 | £ | 94,583    | £ | 13,071    | £ | 107,654   |
| <b>AstraZeneca</b>              | £ | 326,201   | £ | 88,175    | £ | 414,376   |
| <b>BMS</b>                      | £ | 517,082   | £ | 17,750    | £ | 534,832   |
| <b>Bayer</b>                    | £ | 171,758   | £ | 9,098     | £ | 180,856   |
| <b>Bial</b>                     | £ | -         | £ | 5,500     | £ | 5,500     |
| <b>BioMarin</b>                 | £ | 411,912   | £ | 310,455   | £ | 722,367   |
| <b>Biogen</b>                   | £ | 663,142   | £ | -         | £ | 663,142   |
| <b>BlueBird</b>                 | £ | 94,000    | £ | -         | £ | 94,000    |
| <b>Boehringer<br/>Ingelheim</b> | £ | 79,762    | £ | 30,000    | £ | 109,762   |
| <b>Britannia</b>                | £ | 35,000    | £ | 2,030     | £ | 37,030    |
| <b>CSL Behring</b>              | £ | 152,192   | £ | -         | £ | 152,192   |
| <b>Camurus</b>                  | £ | 13,168    | £ | 6,500     | £ | 19,668    |
| <b>Celgene</b>                  | £ | 310,329   | £ | 640       | £ | 310,969   |
| <b>Chiesi</b>                   | £ | 602,259   | £ | 60,000    | £ | 662,259   |
| <b>Chugai</b>                   | £ | 62,092    | £ | -         | £ | 62,092    |
| <b>Clinuvel</b>                 | £ | 1,000     | £ | -         | £ | 1,000     |
| <b>Daiichi Sankyo</b>           | £ | 57,879    | £ | 329,385   | £ | 387,264   |
| <b>Diurnal</b>                  | £ | 6,000     | £ | -         | £ | 6,000     |
| <b>Eisai</b>                    | £ | 476,271   | £ | 183,207   | £ | 659,478   |
| <b>Eli Lilly</b>                | £ | 874,288   | £ | 62,690    | £ | 936,978   |
| <b>Ever</b>                     | £ | 18,934    | £ | 18,934    | £ | 37,867    |
| <b>Ferring</b>                  | £ | -         | £ | 38,000    | £ | 38,000    |
| <b>Flynn</b>                    | £ | -         | £ | 8,002     | £ | 8,002     |
| <b>GSK</b>                      | £ | 325,410   | £ | 159,064   | £ | 484,474   |
| <b>GW</b>                       | £ | 98,788    | £ | 303       | £ | 99,091    |
| <b>Gilead</b>                   | £ | -         | £ | 417,448   | £ | 417,448   |
| <b>Grünenthal</b>               | £ | 4,200     | £ | 1,000     | £ | 5,200     |
| <b>Guerbet</b>                  | £ | -         | £ | 17,000    | £ | 17,000    |
| <b>HRA</b>                      | £ | -         | £ | 10,000    | £ | 10,000    |
| <b>Immedica</b>                 | £ | 19,954    | £ | -         | £ | 19,954    |
| <b>Indivior</b>                 | £ | 1,200     | £ | -         | £ | 1,200     |
| <b>Intercept</b>                | £ | 71,712    | £ | -         | £ | 71,712    |
| <b>Ipsen</b>                    | £ | -         | £ | 50,050    | £ | 50,050    |
| <b>Janssen</b>                  | £ | 1,170,768 | £ | 10,000    | £ | 1,180,768 |
| <b>LEO</b>                      | £ | 78,633    | £ | -         | £ | 78,633    |
| <b>Lundbeck</b>                 | £ | 89,400    | £ | 40,309    | £ | 129,709   |
| <b>Lupin</b>                    | £ | 24,000    | £ | -         | £ | 24,000    |
| <b>MSD</b>                      | £ | 537,632   | £ | 225,287   | £ | 762,919   |
| <b>Merck</b>                    | £ | 763,885   | £ | 1,000     | £ | 764,885   |
| <b>Merz</b>                     | £ | 31,114    | £ | 5,789     | £ | 36,903    |
| <b>Napp</b>                     | £ | 8,000     | £ | 18,020    | £ | 26,020    |
| <b>Norgine</b>                  | £ | -         | £ | 1,240     | £ | 1,240     |
| <b>Novartis</b>                 | £ | 1,442,037 | £ | 46,812    | £ | 1,488,849 |
| <b>Novo Nordisk</b>             | £ | 452,113   | £ | 1,411,598 | £ | 1,863,711 |

|                     |                  |                 |                   |
|---------------------|------------------|-----------------|-------------------|
| <b>Octapharma</b>   | £ -              | £ 2,995         | £ 2,995           |
| <b>PTC</b>          | £ 151,433        | £ -             | £ 151,433         |
| <b>Pfizer</b>       | £ 1,360,510      | £ 509,793       | £ 1,870,303       |
| <b>Pharmasure</b>   | £ -              | £ 6,000         | £ 6,000           |
| <b>Pierre Fabre</b> | £ 50,010         | £ 34,096        | £ 84,106          |
| <b>Recordati</b>    | £ 14,500         | £ -             | £ 14,500          |
| <b>Roche</b>        | £ 1,169,578      | £ 101,395       | £ 1,270,973       |
| <b>Rosemont</b>     | £ 200            | £ 200           | £ 400             |
| <b>Sandoz</b>       | £ -              | £ 20,000        | £ 20,000          |
| <b>Sanofi</b>       | £ 1,262,802      | £ 3,825         | £ 1,266,627       |
| <b>Santen</b>       | £ 38,170         | £ -             | £ 38,170          |
| <b>Seqirus</b>      | £ 105,000        | £ -             | £ 105,000         |
| <b>Servier</b>      | £ 17,163         | £ -             | £ 17,163          |
| <b>Shionogi</b>     | £ -              | £ 17,000        | £ 17,000          |
| <b>Shire</b>        | £ 555,244        | £ 53,980        | £ 609,224         |
| <b>Sobi</b>         | £ 132,988        | £ -             | £ 132,988         |
| <b>Takeda</b>       | £ 420,549        | £ 17,270        | £ 437,819         |
| <b>Teva</b>         | £ -              | £ 51,410        | £ 51,410          |
| <b>Tillotts</b>     | £ 830            | £ -             | £ 830             |
| <b>UCB</b>          | £ 1,493,896      | £ 35,378        | £ 1,529,274       |
| <b>Valneva</b>      | £ 59,512         | £ -             | £ 59,512          |
| <b>Veriton</b>      | £ -              | £ 15,000        | £ 15,000          |
| <b>Vifor</b>        | £ 58,083         | £ 12,000        | £ 70,083          |
| <b>Zogenix</b>      | £ 43,625         | £ -             | £ 43,625          |
| <b>Total (£;%)</b>  | £18,015,722; 80% | £4,561,593; 20% | £22,577,314; 100% |

1

Table 5. Companies' commercial interests by ICD-11 codes according to 2020 payments

| Company              | ICD-11 |    |    |    |    |    |    |    |    |    |    |    |    |    |    |    |    |    |       |
|----------------------|--------|----|----|----|----|----|----|----|----|----|----|----|----|----|----|----|----|----|-------|
|                      | 01     | 02 | 03 | 04 | 05 | 06 | 08 | 09 | 11 | 12 | 13 | 14 | 15 | 16 | 18 | 19 | 20 | 22 | Other |
| Abbvie               | 1      | 1  | 0  | 0  | 0  | 0  | 1  | 0  | 0  | 0  | 1  | 1  | 1  | 0  | 0  | 0  | 0  | 0  | 0     |
| Alexion              | 0      | 0  | 1  | 0  | 1  | 0  | 0  | 0  | 0  | 0  | 0  | 0  | 0  | 0  | 0  | 0  | 0  | 0  | 0     |
| Almirall             | 0      | 0  | 0  | 0  | 0  | 0  | 0  | 0  | 0  | 0  | 0  | 1  | 0  | 0  | 0  | 0  | 0  | 0  | 0     |
| Alnylam              | 0      | 0  | 0  | 0  | 1  | 0  | 0  | 0  | 0  | 0  | 0  | 0  | 0  | 0  | 0  | 0  | 0  | 0  | 0     |
| Amgen                | 0      | 1  | 1  | 0  | 0  | 0  | 0  | 0  | 0  | 0  | 1  | 1  | 1  | 0  | 0  | 0  | 0  | 0  | 0     |
| Amryt                | 0      | 0  | 0  | 0  | 1  | 0  | 0  | 0  | 0  | 0  | 0  | 0  | 0  | 0  | 0  | 0  | 0  | 0  | 0     |
| Astellas             | 0      | 1  | 0  | 0  | 0  | 0  | 0  | 0  | 0  | 0  | 0  | 0  | 0  | 0  | 0  | 0  | 0  | 0  | 0     |
| AstraZeneca          | 0      | 1  | 0  | 0  | 1  | 0  | 0  | 0  | 1  | 0  | 0  | 0  | 0  | 1  | 0  | 0  | 0  | 0  | 0     |
| BMS                  | 0      | 1  | 0  | 0  | 0  | 0  | 1  | 0  | 1  | 0  | 0  | 0  | 1  | 0  | 0  | 0  | 0  | 0  | 0     |
| Bayer                | 0      | 1  | 0  | 0  | 0  | 0  | 0  | 1  | 1  | 0  | 0  | 0  | 0  | 0  | 0  | 0  | 0  | 0  | 0     |
| Bial                 | 0      | 0  | 0  | 0  | 0  | 0  | 1  | 0  | 0  | 0  | 0  | 0  | 0  | 0  | 0  | 0  | 0  | 0  | 0     |
| BioMarin             | 0      | 0  | 1  | 0  | 1  | 0  | 0  | 0  | 0  | 0  | 0  | 0  | 0  | 0  | 0  | 0  | 0  | 0  | 0     |
| Biogen               | 0      | 0  | 0  | 0  | 0  | 0  | 1  | 1  | 0  | 0  | 0  | 0  | 1  | 0  | 0  | 0  | 0  | 0  | 0     |
| BlueBird             | 0      | 0  | 1  | 0  | 0  | 0  | 1  | 0  | 0  | 0  | 0  | 0  | 0  | 0  | 0  | 0  | 0  | 0  | 0     |
| Boehringer Ingelheim | 0      | 0  | 0  | 1  | 0  | 0  | 0  | 0  | 0  | 1  | 0  | 0  | 0  | 0  | 0  | 0  | 0  | 0  | 0     |
| Britannia            | 0      | 0  | 0  | 0  | 0  | 0  | 1  | 0  | 0  | 0  | 0  | 0  | 0  | 0  | 0  | 0  | 0  | 0  | 0     |
| CSL Behring          | 1      | 0  | 1  | 1  | 0  | 0  | 0  | 0  | 0  | 0  | 0  | 0  | 0  | 0  | 0  | 0  | 0  | 0  | 0     |
| Camurus              | 0      | 0  | 0  | 0  | 0  | 0  | 0  | 0  | 0  | 0  | 0  | 0  | 0  | 0  | 0  | 0  | 0  | 0  | 0     |
| Celgene              | 0      | 1  | 0  | 0  | 0  | 0  | 0  | 0  | 0  | 0  | 0  | 0  | 0  | 0  | 0  | 0  | 0  | 0  | 0     |
| Chiesi               | 0      | 0  | 1  | 0  | 1  | 0  | 0  | 0  | 0  | 1  | 0  | 0  | 0  | 0  | 0  | 0  | 0  | 0  | 0     |
| Chugai               | 0      | 0  | 1  | 0  | 0  | 0  | 0  | 0  | 0  | 0  | 0  | 0  | 1  | 0  | 0  | 0  | 0  | 0  | 0     |
| Clinuvel             | 0      | 0  | 0  | 0  | 1  | 0  | 0  | 0  | 0  | 0  | 0  | 0  | 0  | 0  | 0  | 0  | 0  | 0  | 0     |
| Daiichi Sankyo       | 0      | 1  | 0  | 0  | 0  | 0  | 0  | 0  | 1  | 0  | 0  | 0  | 0  | 0  | 0  | 0  | 0  | 0  | 0     |
| Diurnal              | 0      | 0  | 0  | 0  | 1  | 0  | 0  | 0  | 0  | 0  | 0  | 0  | 0  | 0  | 0  | 0  | 0  | 0  | 0     |

|                     |   |   |   |   |   |   |   |   |   |   |   |   |   |   |   |   |   |   |   |
|---------------------|---|---|---|---|---|---|---|---|---|---|---|---|---|---|---|---|---|---|---|
| <b>Eisai</b>        | 0 | 1 | 0 | 0 | 0 | 1 | 1 | 0 | 0 | 0 | 0 | 0 | 0 | 0 | 0 | 0 | 0 | 0 | 0 |
| <b>Eli Lilly</b>    | 0 | 1 | 0 | 0 | 1 | 0 | 1 | 0 | 0 | 0 | 0 | 1 | 1 | 0 | 0 | 0 | 0 | 0 | 0 |
| <b>Ever</b>         | 0 | 0 | 0 | 0 | 0 | 0 | 1 | 0 | 0 | 0 | 0 | 0 | 0 | 0 | 0 | 0 | 0 | 0 | 0 |
| <b>Ferring</b>      | 0 | 1 | 0 | 0 | 0 | 0 | 0 | 0 | 0 | 0 | 0 | 0 | 0 | 1 | 0 | 0 | 0 | 0 | 0 |
| <b>Flynn</b>        | 0 | 0 | 0 | 0 | 0 | 1 | 0 | 0 | 0 | 0 | 0 | 0 | 0 | 0 | 0 | 0 | 0 | 0 | 0 |
| <b>GSK</b>          | 1 | 1 | 0 | 1 | 0 | 0 | 0 | 0 | 1 | 0 | 0 | 0 | 0 | 0 | 0 | 0 | 0 | 0 | 0 |
| <b>GW</b>           | 0 | 0 | 0 | 0 | 0 | 0 | 0 | 0 | 0 | 0 | 0 | 0 | 0 | 0 | 0 | 0 | 0 | 0 | 0 |
| <b>Gilead</b>       | 1 | 1 | 0 | 0 | 0 | 0 | 0 | 0 | 0 | 0 | 1 | 0 | 0 | 0 | 0 | 0 | 0 | 0 | 0 |
| <b>Grünenthal</b>   | 0 | 0 | 0 | 0 | 0 | 0 | 0 | 0 | 0 | 0 | 0 | 0 | 0 | 0 | 0 | 0 | 0 | 0 | 0 |
| <b>Guerbet</b>      | 0 | 0 | 0 | 0 | 0 | 0 | 0 | 0 | 0 | 0 | 0 | 0 | 0 | 1 | 0 | 0 | 0 | 0 | 0 |
| <b>HRA</b>          | 0 | 0 | 0 | 0 | 0 | 0 | 0 | 0 | 0 | 0 | 0 | 0 | 0 | 0 | 0 | 0 | 0 | 0 | 0 |
| <b>Immedica</b>     | 0 | 0 | 0 | 0 | 0 | 0 | 0 | 0 | 0 | 0 | 0 | 0 | 0 | 0 | 0 | 0 | 0 | 0 | 0 |
| <b>Indivior</b>     | 0 | 0 | 0 | 0 | 0 | 0 | 0 | 0 | 0 | 0 | 0 | 0 | 0 | 0 | 0 | 0 | 0 | 0 | 0 |
| <b>Intercept</b>    | 0 | 0 | 0 | 0 | 0 | 0 | 0 | 0 | 0 | 0 | 1 | 0 | 0 | 0 | 0 | 0 | 0 | 0 | 0 |
| <b>Ipsen</b>        | 0 | 1 | 0 | 0 | 0 | 0 | 1 | 0 | 0 | 0 | 0 | 0 | 0 | 0 | 0 | 0 | 0 | 0 | 0 |
| <b>Janssen</b>      | 1 | 1 | 0 | 0 | 0 | 0 | 0 | 0 | 1 | 0 | 1 | 1 | 0 | 0 | 0 | 0 | 0 | 0 | 0 |
| <b>LEO</b>          | 0 | 0 | 0 | 0 | 0 | 0 | 0 | 0 | 1 | 0 | 0 | 1 | 0 | 0 | 0 | 0 | 0 | 0 | 0 |
| <b>Lundbeck</b>     | 0 | 0 | 0 | 0 | 0 | 1 | 1 | 0 | 0 | 0 | 0 | 0 | 0 | 0 | 0 | 0 | 0 | 0 | 0 |
| <b>Lupin</b>        | 0 | 0 | 0 | 0 | 0 | 0 | 1 | 0 | 0 | 0 | 0 | 0 | 0 | 0 | 0 | 0 | 0 | 0 | 0 |
| <b>MSD</b>          | 1 | 1 | 0 | 0 | 0 | 0 | 0 | 0 | 0 | 0 | 0 | 0 | 0 | 0 | 0 | 0 | 0 | 0 | 0 |
| <b>Merck</b>        | 0 | 1 | 0 | 0 | 0 | 0 | 1 | 0 | 0 | 0 | 0 | 0 | 0 | 1 | 0 | 0 | 0 | 0 | 0 |
| <b>Merz</b>         | 0 | 0 | 0 | 0 | 0 | 0 | 0 | 0 | 0 | 0 | 0 | 0 | 0 | 0 | 0 | 0 | 0 | 0 | 0 |
| <b>Napp</b>         | 0 | 0 | 0 | 0 | 1 | 0 | 0 | 0 | 0 | 0 | 0 | 0 | 0 | 0 | 0 | 0 | 0 | 0 | 0 |
| <b>Norgine</b>      | 0 | 0 | 0 | 0 | 0 | 0 | 0 | 0 | 0 | 0 | 0 | 0 | 0 | 0 | 0 | 0 | 0 | 0 | 0 |
| <b>Novartis</b>     | 0 | 1 | 1 | 0 | 0 | 0 | 1 | 1 | 1 | 0 | 0 | 1 | 1 | 0 | 0 | 0 | 0 | 0 | 0 |
| <b>Novo Nordisk</b> | 0 | 0 | 1 | 0 | 1 | 0 | 0 | 0 | 0 | 0 | 0 | 0 | 0 | 0 | 0 | 0 | 1 | 0 | 0 |
| <b>Octapharma</b>   | 0 | 0 | 0 | 0 | 0 | 0 | 0 | 0 | 0 | 0 | 0 | 0 | 0 | 0 | 0 | 0 | 0 | 0 | 0 |
| <b>PTC</b>          | 0 | 0 | 0 | 0 | 0 | 0 | 1 | 0 | 0 | 0 | 0 | 0 | 0 | 0 | 0 | 0 | 0 | 0 | 0 |
| <b>Pfizer</b>       | 1 | 1 | 1 | 0 | 1 | 0 | 1 | 0 | 1 | 0 | 1 | 0 | 1 | 0 | 0 | 0 | 1 | 0 | 0 |
| <b>Pharmasure</b>   | 0 | 0 | 0 | 0 | 0 | 0 | 0 | 0 | 0 | 0 | 0 | 0 | 0 | 0 | 1 | 0 | 0 | 0 | 0 |



|                     |   |   |   |   |   |   |   |   |   |   |   |   |   |   |   |   |   |   |   |
|---------------------|---|---|---|---|---|---|---|---|---|---|---|---|---|---|---|---|---|---|---|
| <b>Pierre Fabre</b> | 0 | 1 | 0 | 0 | 0 | 0 | 0 | 0 | 0 | 0 | 0 | 0 | 1 | 0 | 0 | 0 | 0 | 0 | 0 |
| <b>Recordati</b>    | 0 | 0 | 0 | 0 | 1 | 0 | 0 | 0 | 0 | 0 | 0 | 0 | 0 | 0 | 0 | 0 | 0 | 0 | 0 |
| <b>Roche</b>        | 0 | 1 | 0 | 0 | 0 | 0 | 1 | 0 | 0 | 1 | 1 | 0 | 0 | 0 | 1 | 0 | 0 | 0 | 0 |
| <b>Rosemont</b>     | 0 | 0 | 0 | 0 | 0 | 0 | 0 | 0 | 0 | 0 | 0 | 0 | 0 | 0 | 0 | 0 | 0 | 0 | 0 |
| <b>Sandoz</b>       | 0 | 0 | 0 | 0 | 0 | 0 | 0 | 0 | 0 | 0 | 0 | 0 | 0 | 0 | 0 | 0 | 0 | 0 | 0 |
| <b>Sanofi</b>       | 1 | 1 | 1 | 1 | 1 | 0 | 1 | 0 | 1 | 0 | 0 | 1 | 1 | 1 | 0 | 0 | 0 | 0 | 0 |
| <b>Santen</b>       | 0 | 0 | 0 | 1 | 0 | 0 | 0 | 1 | 0 | 0 | 0 | 0 | 0 | 0 | 0 | 0 | 0 | 0 | 0 |
| <b>Seqirus</b>      | 0 | 0 | 0 | 0 | 0 | 0 | 0 | 0 | 0 | 0 | 0 | 0 | 0 | 0 | 0 | 0 | 0 | 0 | 0 |
| <b>Servier</b>      | 0 | 1 | 0 | 0 | 0 | 0 | 0 | 0 | 0 | 0 | 0 | 0 | 0 | 0 | 0 | 0 | 0 | 0 | 0 |
| <b>Shionogi</b>     | 0 | 0 | 0 | 0 | 0 | 0 | 0 | 0 | 0 | 0 | 0 | 0 | 0 | 0 | 0 | 0 | 0 | 0 | 0 |
| <b>Shire</b>        | 0 | 0 | 1 | 1 | 1 | 1 | 0 | 0 | 0 | 0 | 0 | 0 | 0 | 0 | 0 | 0 | 0 | 0 | 0 |
| <b>Sobi</b>         | 0 | 1 | 1 | 0 | 1 | 0 | 0 | 0 | 0 | 0 | 0 | 0 | 0 | 0 | 0 | 0 | 0 | 0 | 0 |
| <b>Takeda</b>       | 0 | 1 | 0 | 0 | 1 | 0 | 0 | 0 | 0 | 0 | 1 | 0 | 0 | 0 | 0 | 0 | 0 | 0 | 0 |
| <b>Teva</b>         | 0 | 0 | 0 | 0 | 0 | 0 | 0 | 0 | 0 | 0 | 0 | 0 | 0 | 0 | 0 | 0 | 0 | 0 | 0 |
| <b>Tillotts</b>     | 0 | 0 | 0 | 0 | 0 | 0 | 0 | 0 | 0 | 0 | 1 | 0 | 0 | 0 | 0 | 0 | 0 | 0 | 0 |
| <b>UCB</b>          | 0 | 0 | 1 | 0 | 0 | 0 | 1 | 0 | 0 | 0 | 0 | 1 | 1 | 0 | 0 | 0 | 0 | 0 | 0 |
| <b>Valneva</b>      | 1 | 0 | 0 | 0 | 0 | 0 | 0 | 0 | 0 | 0 | 0 | 0 | 0 | 0 | 0 | 0 | 0 | 0 | 0 |
| <b>Veriton</b>      | 0 | 0 | 0 | 0 | 0 | 0 | 0 | 0 | 0 | 0 | 0 | 0 | 0 | 0 | 0 | 0 | 0 | 0 | 0 |
| <b>Vifor</b>        | 0 | 0 | 0 | 0 | 0 | 0 | 0 | 0 | 0 | 0 | 0 | 0 | 0 | 0 | 0 | 0 | 0 | 0 | 0 |
| <b>Zogenix</b>      | 0 | 0 | 0 | 0 | 0 | 0 | 1 | 0 | 0 | 0 | 0 | 0 | 0 | 0 | 0 | 0 | 0 | 0 | 0 |

Notes: This table reflects whether companies had a definite or probable interest in the ICD-11 code based on their pipeline or portfolio (1 = yes, 0 = no). Please note that companies' interests were opportunistically screened only in disease areas where they made a payment to a specific patient organisation, and therefore this table should not be considered exhaustive. The table refers payments made in 2020 only.

Legend: 01 Certain infectious or parasitic diseases; 02 Neoplasms; 03 Diseases of the blood or blood-forming organs; 04 Diseases of the immune system; 05 Endocrine, nutritional or metabolic diseases; 06 Mental, behavioural or neurodevelopmental disorders; 08 Diseases of the nervous system; 09 Diseases of the visual system; 11 Diseases of the circulatory system; 12 Diseases of the respiratory system; 13 Diseases of the digestive system; 14 Diseases of the skin; 15 Diseases of the musculoskeletal system or connective tissue; 16 Diseases of the genitourinary system; 18 Pregnancy, childbirth or the puerperium; 19 Certain conditions originating in the perinatal period; 20 Developmental anomalies; 22 Injury, poisoning or certain other consequences of external causes; Other. Other indicates disease areas where patient organisations operate that could not be classified as any ICD-11 codes.

**Table 6. List of patient organisations receiving payments in 2020**

| Standardised name                          | Charity number | Link                                                                                                                                                                                                              |
|--------------------------------------------|----------------|-------------------------------------------------------------------------------------------------------------------------------------------------------------------------------------------------------------------|
| Acacia Mews Care Home                      | 1174346        | <a href="https://www.nhs.uk/services/Careproviders/Overview/DefaultView.aspx?id=47011">https://www.nhs.uk/services/Careproviders/Overview/DefaultView.aspx?id=47011</a>                                           |
| Action Bladder Cancer UK                   | 1164374        | <a href="https://actionbladdercanceruk.org/">https://actionbladdercanceruk.org/</a>                                                                                                                               |
| Action for Pulmonary Fibrosis              | 1152399        | <a href="https://www.actionpf.org/">https://www.actionpf.org/</a>                                                                                                                                                 |
| Action On Pre-Eclampsia                    | 1013557        | <a href="https://action-on-pre-eclampsia.org.uk/">https://action-on-pre-eclampsia.org.uk/</a>                                                                                                                     |
| Action on Smoking and Health - Wales       | 1120834        | <a href="https://ash.wales/">https://ash.wales/</a>                                                                                                                                                               |
| Action Duchenne                            | 1101971        | <a href="https://www.actionduchenne.org/">https://www.actionduchenne.org/</a>                                                                                                                                     |
| Adfam                                      | 1067428        | <a href="https://adfam.org.uk/">https://adfam.org.uk/</a>                                                                                                                                                         |
| Africa Advocacy Foundation                 | 1164778        | <a href="https://www.africadvocacy.org/">https://www.africadvocacy.org/</a>                                                                                                                                       |
| African-Caribbean Leukaemia Trust          | 1119516        | <a href="https://aclt.org/">https://aclt.org/</a>                                                                                                                                                                 |
| Age UK                                     | 1128267        | <a href="https://www.ageuk.org.uk/">https://www.ageuk.org.uk/</a>                                                                                                                                                 |
| Alex - The Leukodystrophy Charity          | 1106008        | <a href="https://www.alextlc.org/">https://www.alextlc.org/</a>                                                                                                                                                   |
| ALK Positive Lung Cancer                   | 1181171        | <a href="https://www.alkpositive.org.uk/">https://www.alkpositive.org.uk/</a>                                                                                                                                     |
| Alkaptonuria Society                       | 1101052        | <a href="https://akusociety.org/">https://akusociety.org/</a>                                                                                                                                                     |
| Allergy UK                                 | 1094231        | <a href="https://www.allergyuk.org/">https://www.allergyuk.org/</a>                                                                                                                                               |
| Alliance for Heart Failure                 | N/A            | <a href="https://allianceforheartfailure.org/">https://allianceforheartfailure.org/</a>                                                                                                                           |
| Alzheimer Scotland                         | SC022315       | <a href="https://www.alzscot.org/">https://www.alzscot.org/</a>                                                                                                                                                   |
| Alzheimer's Support                        | 1048314        | <a href="https://www.alzheimerswiltshire.org.uk/">https://www.alzheimerswiltshire.org.uk/</a>                                                                                                                     |
| Alzheimer's Research UK                    | 1077089        | <a href="https://www.alzheimersresearchuk.org/">https://www.alzheimersresearchuk.org/</a>                                                                                                                         |
| Alzheimer's Society                        | 296645         | <a href="https://www.alzheimers.org.uk/">https://www.alzheimers.org.uk/</a>                                                                                                                                       |
| Amyloidosis Patients Association           | 1183624        | <a href="https://register-of-charities.charitycommission.gov.uk/charity-details/?regid=1183624&amp;subid=0">https://register-of-charities.charitycommission.gov.uk/charity-details/?regid=1183624&amp;subid=0</a> |
| Anthony Nolan                              | 803716         | <a href="https://www.anthonynolan.org/">https://www.anthonynolan.org/</a>                                                                                                                                         |
| Anticoagulation UK                         | 1090250        | <a href="https://register-of-charities.charitycommission.gov.uk/charity-details/?regid=1090250&amp;subid=0">https://register-of-charities.charitycommission.gov.uk/charity-details/?regid=1090250&amp;subid=0</a> |
| AOFAC Foundation                           | 1162155        | <a href="https://aofacfoundation.org/">https://aofacfoundation.org/</a>                                                                                                                                           |
| Aplastic Anaemia Trust                     | 1107539        | <a href="https://www.theaat.org.uk/">https://www.theaat.org.uk/</a>                                                                                                                                               |
| APS Support UK                             | 1138116        | <a href="https://aps-support.org.uk/">https://aps-support.org.uk/</a>                                                                                                                                             |
| Arthritis and Musculoskeletal Alliance     | 1108851        | <a href="http://arma.uk.net/">http://arma.uk.net/</a>                                                                                                                                                             |
| Aspens                                     | 1171446        | <a href="https://www.aspens.org.uk/">https://www.aspens.org.uk/</a>                                                                                                                                               |
| Association for Glycogen Storage Disease   | 1132271        | <a href="https://agsd.org.uk/">https://agsd.org.uk/</a>                                                                                                                                                           |
| Asthma + Lung UK                           | 326730         | <a href="https://www.asthma.org.uk/">https://www.asthma.org.uk/</a>                                                                                                                                               |
| Astriid                                    | 1176645        | <a href="https://astriid.org/">https://astriid.org/</a>                                                                                                                                                           |
| Atrial Fibrillation Association            | 1122442        | Supporting children terminally ill                                                                                                                                                                                |
| Axial Spondylitis International Federation | 1173902        | <a href="https://asif.info/">https://asif.info/</a>                                                                                                                                                               |
| Baby Lifeline                              | 1006457        | <a href="https://www.babylifeline.org.uk/">https://www.babylifeline.org.uk/</a>                                                                                                                                   |
| Bath Institute for Rheumatic Diseases      | 1040650        | <a href="https://www.birdbath.org.uk/">https://www.birdbath.org.uk/</a>                                                                                                                                           |

|                                               |          |                                                                                                                       |
|-----------------------------------------------|----------|-----------------------------------------------------------------------------------------------------------------------|
| Batten Disease Family Association             | 1084908  | <a href="http://www.bdfa-uk.org.uk/">http://www.bdfa-uk.org.uk/</a>                                                   |
| Bipolar UK                                    | 293340   | <a href="https://www.bipolaruk.org/">https://www.bipolaruk.org/</a>                                                   |
| Bladder Health UK                             | 1149973  | <a href="https://bladderhealthuk.org/">https://bladderhealthuk.org/</a>                                               |
| Bliss                                         | 1002973  | <a href="https://www.bliss.org.uk/">https://www.bliss.org.uk/</a>                                                     |
| Blood Cancer Alliance                         | N/A      | <a href="https://www.bloodcanceralliance.org/">https://www.bloodcanceralliance.org/</a>                               |
| Blood Cancer UK                               | 216032   | <a href="https://bloodcancer.org.uk/">https://bloodcancer.org.uk/</a>                                                 |
| BME Cancer Communities                        | 1182806  | <a href="https://www.bmecancer.com/">https://www.bmecancer.com/</a>                                                   |
| Bowel Cancer UK                               | 1071038  | <a href="https://www.bowelcanceruk.org.uk/">https://www.bowelcanceruk.org.uk/</a>                                     |
| Brains Trust                                  | 1114634  | <a href="https://brainstrust.org.uk/">https://brainstrust.org.uk/</a>                                                 |
| Breast Cancer Haven (The Haven)               | 3291851  | <a href="https://www.breastcancerhaven.org.uk/">https://www.breastcancerhaven.org.uk/</a>                             |
| Breast Cancer Now                             | 1160558  | <a href="https://breastcancer.org.uk/">https://breastcancer.org.uk/</a>                                               |
| British Association of the Study of the Liver | 1106320  | <a href="https://www.basl.org.uk/">https://www.basl.org.uk/</a>                                                       |
| British Heart Foundation                      | 225971   | <a href="https://www.bhf.org.uk/">https://www.bhf.org.uk/</a>                                                         |
| British Inherited Metabolic Disease Group     | 1184024  | <a href="https://www.bimdg.org.uk/site/index.asp">https://www.bimdg.org.uk/site/index.asp</a>                         |
| British Liver Trust                           | 298858   | <a href="https://britishlivertrust.org.uk/">https://britishlivertrust.org.uk/</a>                                     |
| British Paediatric Neurology Association      | 1159115  | <a href="https://bpna.org.uk/">https://bpna.org.uk/</a>                                                               |
| British Porphyria Association                 | 1089609  | <a href="http://porphyria.org.uk/">http://porphyria.org.uk/</a>                                                       |
| British Skin Foundation                       | 1171373  | <a href="https://www.britishskinfoundation.org.uk/">https://www.britishskinfoundation.org.uk/</a>                     |
| British Society for Heart Failure             | 1075720  | <a href="https://www.bsh.org.uk/">https://www.bsh.org.uk/</a>                                                         |
| British Society of Echocardiography           | 1093808  | <a href="https://www.bsecho.org/">https://www.bsecho.org/</a>                                                         |
| British Thyroid Foundation                    | 1006391  | <a href="https://www.btf-thyroid.org/">https://www.btf-thyroid.org/</a>                                               |
| Cambridge Rare Disease Network                | 1166365  | <a href="https://www.camraredisease.org/">https://www.camraredisease.org/</a>                                         |
| Cancer 52                                     | 7994413  | <a href="https://www.cancer52.org.uk/">https://www.cancer52.org.uk/</a>                                               |
| Cancer Black Care                             | 1086465  | <a href="https://www.cancerblackcare.org.uk/">https://www.cancerblackcare.org.uk/</a>                                 |
| Cancer Focus Northern Ireland                 | 101307   | <a href="https://cancerfocusni.org/">https://cancerfocusni.org/</a>                                                   |
| Cancer Research UK                            | 1089464  | <a href="https://www.cancerresearchuk.org/">https://www.cancerresearchuk.org/</a>                                     |
| Cancer Support Scotland                       | SC012867 | <a href="https://www.cancersupportscotland.org/">https://www.cancersupportscotland.org/</a>                           |
| Cancer Support UK                             | 1105703  | <a href="https://cancersupportuk.org/">https://cancersupportuk.org/</a>                                               |
| CancerCare                                    | 1120048  | <a href="https://cancercare.org.uk/">https://cancercare.org.uk/</a>                                                   |
| Cara Trust                                    | 328124   | <a href="https://www.madtrust.org.uk/project/the-cara-trust/">https://www.madtrust.org.uk/project/the-cara-trust/</a> |
| Cardiomyopathy UK                             | 1164263  | <a href="https://www.cardiomyopathy.org/">https://www.cardiomyopathy.org/</a>                                         |
| Carers UK                                     | N/A      | <a href="https://www.carersuk.org/">https://www.carersuk.org/</a>                                                     |
| Changing Faces                                | 1011222  | <a href="https://www.changingfaces.org.uk/">https://www.changingfaces.org.uk/</a>                                     |
| Child Growth Foundation                       | 1172807  | <a href="https://childgrowthfoundation.org/">https://childgrowthfoundation.org/</a>                                   |
| Childhood Trust                               | 1154032  | <a href="https://www.childhoodtrust.org.uk/">https://www.childhoodtrust.org.uk/</a>                                   |
| Children's Cancer and Leukaemia Group         | 1182637  | <a href="https://www.cclg.org.uk/">https://www.cclg.org.uk/</a>                                                       |
| Children's HIV Association                    | 1122356  | <a href="https://www.chiva.org.uk/">https://www.chiva.org.uk/</a>                                                     |
| Children's Trust                              | 288018   | <a href="https://www.thechildrenstrust.org.uk/">https://www.thechildrenstrust.org.uk/</a>                             |
| Children's Burns Trust                        | 1082084  | <a href="https://www.cbtrust.org.uk/">https://www.cbtrust.org.uk/</a>                                                 |

|                                                   |          |                                                                                                                                                                                                                                                                             |
|---------------------------------------------------|----------|-----------------------------------------------------------------------------------------------------------------------------------------------------------------------------------------------------------------------------------------------------------------------------|
| Cholangiocarcinoma Charity                        | 1091915  | <a href="https://ammf.org.uk/">https://ammf.org.uk/</a>                                                                                                                                                                                                                     |
| Chronic Lymphocytic Leukaemia Support Association | 1178482  | <a href="https://www.cllsupport.org.uk/">https://www.cllsupport.org.uk/</a>                                                                                                                                                                                                 |
| Coalition for Life-Course Immunisation            | 1182662  | <a href="https://www.cl-ci.org/">https://www.cl-ci.org/</a>                                                                                                                                                                                                                 |
| Confederation of Meningitis Organisations         | 1091105  | <a href="https://www.comeningitis.org/">https://www.comeningitis.org/</a>                                                                                                                                                                                                   |
| Contact a Family                                  | 284912   | <a href="https://contact.org.uk/">https://contact.org.uk/</a>                                                                                                                                                                                                               |
| Crohn's and Colitis UK                            | 1117148  | <a href="https://www.crohnsandcolitis.org.uk/">https://www.crohnsandcolitis.org.uk/</a>                                                                                                                                                                                     |
| Cystic Fibrosis Trust                             | 1079049  | <a href="https://www.cysticfibrosis.org.uk/">https://www.cysticfibrosis.org.uk/</a>                                                                                                                                                                                         |
| Dementia UK                                       | 1039404  | <a href="https://www.dementiauk.org/">https://www.dementiauk.org/</a>                                                                                                                                                                                                       |
| Dementia Club UK                                  | 1168397  | <a href="https://dementioclubuk.org.uk/">https://dementioclubuk.org.uk/</a>                                                                                                                                                                                                 |
| Diabetes UK                                       | 215199   | <a href="https://www.diabetes.org.uk/">https://www.diabetes.org.uk/</a>                                                                                                                                                                                                     |
| Diana Award                                       | 1117288  | <a href="https://diana-award.org.uk/">https://diana-award.org.uk/</a>                                                                                                                                                                                                       |
| DMD Pathfinders                                   | 1155884  | <a href="https://www.pathfindersalliance.org.uk/">https://www.pathfindersalliance.org.uk/</a>                                                                                                                                                                               |
| Down Syndrome International                       | 1091843  | <a href="https://www.ds-int.org/">https://www.ds-int.org/</a>                                                                                                                                                                                                               |
| Downs Syndrome Association                        | 1061474  | <a href="https://www.downs-syndrome.org.uk/">https://www.downs-syndrome.org.uk/</a>                                                                                                                                                                                         |
| Dravet Syndrome UK                                | 1128289  | <a href="https://www.dravet.org.uk/">https://www.dravet.org.uk/</a>                                                                                                                                                                                                         |
| DrugFAM                                           | 1123316  | <a href="https://www.drugfam.co.uk/#">https://www.drugfam.co.uk/#</a>                                                                                                                                                                                                       |
| Duchenne UK                                       | 1147094  | <a href="https://www.duchenneuk.org/">https://www.duchenneuk.org/</a>                                                                                                                                                                                                       |
| Dystonia UK                                       | 1062595  | <a href="https://www.dystonia.org.uk/">https://www.dystonia.org.uk/</a>                                                                                                                                                                                                     |
| East North Hertfordshire NHS Trust                | 1053338  | <a href="https://www.enherts-tr.nhs.uk/">https://www.enherts-tr.nhs.uk/</a>                                                                                                                                                                                                 |
| East Sussex Healthcare NHS Trust                  | 1058599  | <a href="https://www.esht.nhs.uk/">https://www.esht.nhs.uk/</a>                                                                                                                                                                                                             |
| Ecancer                                           | 1176307  | <a href="https://ecancer.org/en/">https://ecancer.org/en/</a>                                                                                                                                                                                                               |
| Eczema Outreach Support                           | SC042392 | <a href="https://www.eos.org.uk/">https://www.eos.org.uk/</a>                                                                                                                                                                                                               |
| Encephalitis Society                              | 1087843  | <a href="https://www.encephalitis.info/">https://www.encephalitis.info/</a>                                                                                                                                                                                                 |
| Epilepsy Action                                   | 234343   | <a href="https://www.epilepsy.org.uk/?gclid=CjwKCAiAsNKQBhAPEiwAB-I5zXsMWEMg1x_J-blYzK3HQGZujp-zoejjkEA_sYpKqYxct5LuE_sV6hoC1t8QAvD_BwE">https://www.epilepsy.org.uk/?gclid=CjwKCAiAsNKQBhAPEiwAB-I5zXsMWEMg1x_J-blYzK3HQGZujp-zoejjkEA_sYpKqYxct5LuE_sV6hoC1t8QAvD_BwE</a> |
| Epilepsy Consortium Scotland                      | N/A      | <a href="http://www.epilepsyconsortiumscotland.co.uk/">http://www.epilepsyconsortiumscotland.co.uk/</a>                                                                                                                                                                     |
| Epilepsy Research UK                              | 1100394  | <a href="https://epilepsyresearch.org.uk/">https://epilepsyresearch.org.uk/</a>                                                                                                                                                                                             |
| Epilepsy Scotland                                 | SC000067 | <a href="https://www.epilepsyscotland.org.uk/">https://www.epilepsyscotland.org.uk/</a>                                                                                                                                                                                     |
| Epilepsy Society                                  | 206186   | <a href="https://epilepsysociety.org.uk/">https://epilepsysociety.org.uk/</a>                                                                                                                                                                                               |
| Errol Mckellar Foundation                         | 1181574  | <a href="https://www.theerrolmckellarfoundation.com/">https://www.theerrolmckellarfoundation.com/</a>                                                                                                                                                                       |
| European Parkinson's Disease Association          | 1163211  | <a href="https://www.epda.eu.com/">https://www.epda.eu.com/</a>                                                                                                                                                                                                             |
| Eve Appeal                                        | 1091708  | <a href="https://eveappeal.org.uk/">https://eveappeal.org.uk/</a>                                                                                                                                                                                                           |
| Familial Hypercholesterolaemia Network            | 1170731  | <a href="https://fheurope.org/">https://fheurope.org/</a>                                                                                                                                                                                                                   |
| FareShare                                         | 1100051  | <a href="https://fareshare.org.uk/">https://fareshare.org.uk/</a>                                                                                                                                                                                                           |
| Favor UK                                          | N/A      | <a href="https://www.facesandvoicesofrecoveryuk.org/">https://www.facesandvoicesofrecoveryuk.org/</a>                                                                                                                                                                       |

|                                                   |          |                                                                                                                                                         |
|---------------------------------------------------|----------|---------------------------------------------------------------------------------------------------------------------------------------------------------|
| Fertility Network UK                              | 1099960  | <a href="https://fertilitynetworkuk.org/">https://fertilitynetworkuk.org/</a>                                                                           |
| Fight Bladder Cancer                              | 1157763  | <a href="https://www.fightbladdercancer.co.uk/">https://www.fightbladdercancer.co.uk/</a>                                                               |
| Fight for Sight UK                                | 1111438  | <a href="https://www.fightforsight.org.uk/">https://www.fightforsight.org.uk/</a>                                                                       |
| Findacure                                         | 1149646  | <a href="https://www.rarebeacon.org/about-us/our-journey/">https://www.rarebeacon.org/about-us/our-journey/</a>                                         |
| Gauchers Association                              | 1095657  | <a href="https://www.gaucher.org.uk/">https://www.gaucher.org.uk/</a>                                                                                   |
| Gene People                                       | 1141583  | <a href="https://genepeople.org.uk/">https://genepeople.org.uk/</a>                                                                                     |
| Genetic Alliance UK                               | 1114195  | <a href="https://geneticalliance.org.uk/">https://geneticalliance.org.uk/</a>                                                                           |
| GetYourBellyOut                                   | 11276246 | <a href="https://getyourbellyout.org.uk/">https://getyourbellyout.org.uk/</a>                                                                           |
| GIST Cancer UK                                    | 1129219  | <a href="https://www.gistcancer.org.uk/">https://www.gistcancer.org.uk/</a>                                                                             |
| Global Action on Men's Health                     | 1183428  | <a href="https://gamh.org/">https://gamh.org/</a>                                                                                                       |
| GO Girls                                          | 1179108  | <a href="https://www.gogirlssupport.org/">https://www.gogirlssupport.org/</a>                                                                           |
| Gorlin Syndrome Group                             | 1197282  | <a href="https://gorlingroup.org/">https://gorlingroup.org/</a>                                                                                         |
| Guts UK                                           | 1137029  | <a href="https://gutscharity.org.uk/">https://gutscharity.org.uk/</a>                                                                                   |
| Haemochromatosis UK                               | 1001307  | <a href="https://www.haemochromatosis.org.uk/">https://www.haemochromatosis.org.uk/</a>                                                                 |
| Haemophilia Scotland                              | SC044298 | <a href="https://haemophilia.scot/">https://haemophilia.scot/</a>                                                                                       |
| Haemophilia Society                               | 288260   | <a href="https://haemophilia.org.uk/">https://haemophilia.org.uk/</a>                                                                                   |
| Headway East London                               | 1083910  | <a href="https://headwayeastlondon.org/">https://headwayeastlondon.org/</a>                                                                             |
| Heart UK                                          | 1003904  | <a href="https://www.heartuk.org.uk/">https://www.heartuk.org.uk/</a>                                                                                   |
| Heartburn Cancer UK                               | 1136413  | <a href="https://www.heartburncanceruk.org/">https://www.heartburncanceruk.org/</a>                                                                     |
| Helen & Douglas House                             | 1085951  | <a href="https://www.helenanddouglas.org.uk/">https://www.helenanddouglas.org.uk/</a>                                                                   |
| Hepatitis C Coalition                             | N/A      | <a href="http://www.hepc-coalition.uk/">http://www.hepc-coalition.uk/</a>                                                                               |
| Hepatitis C Trust                                 | 1104279  | <a href="http://hepctrust.org.uk/">http://hepctrust.org.uk/</a>                                                                                         |
| Hereditary Angioedema UK                          | 1152591  | <a href="https://www.haeuk.org/">https://www.haeuk.org/</a>                                                                                             |
| Hidradenitis Suppurativa Trust                    | 1177819  | <a href="https://painuk.org/members/charities/hidradenitis-suppurativa-trust/">https://painuk.org/members/charities/hidradenitis-suppurativa-trust/</a> |
| Histiocytosis UK                                  | 1158789  | <a href="https://www.histiouk.org/">https://www.histiouk.org/</a>                                                                                       |
| HIV i-Base                                        | 1081905  | <a href="https://i-base.info/">https://i-base.info/</a>                                                                                                 |
| HIV Scotland                                      | SC033951 | <a href="https://www.hiv.scot/">https://www.hiv.scot/</a>                                                                                               |
| Human Story Theatre                               | 1173504  | <a href="https://humanstorytheatre.com/about-us/">https://humanstorytheatre.com/about-us/</a>                                                           |
| Huntington's Disease Association                  | 296453   | <a href="https://www.hda.org.uk/">https://www.hda.org.uk/</a>                                                                                           |
| Huntington's Disease Youth Organization           | 1145781  | <a href="https://en.hdyo.org/">https://en.hdyo.org/</a>                                                                                                 |
| Immune Deficiency Patient Group of Wales          | N/A      | <a href="https://www.facebook.com/tommy.browne.idpgw/">https://www.facebook.com/tommy.browne.idpgw/</a>                                                 |
| Immune Thrombocytopenia Support Association       | 1064480  | <a href="https://www.itpsupport.org.uk/index.php/en/">https://www.itpsupport.org.uk/index.php/en/</a>                                                   |
| Independent Cancer Patients' Voice                | 1138456  | <a href="http://www.independentcancerpatientsvoice.org.uk/">http://www.independentcancerpatientsvoice.org.uk/</a>                                       |
| Intensive Care Society                            | 1039236  | <a href="https://www.ics.ac.uk/">https://www.ics.ac.uk/</a>                                                                                             |
| International Alliance of Patients' Organizations | 1155577  | <a href="https://www.iapo.org.uk/">https://www.iapo.org.uk/</a>                                                                                         |
| International Brain Tumour Alliance               | N/A      | <a href="https://theibta.org/">https://theibta.org/</a>                                                                                                 |
| International Gaucher Alliance                    | 6653373  | <a href="https://gaucheralliance.org/home">https://gaucheralliance.org/home</a>                                                                         |
| International Headache Society                    | 1042574  | <a href="https://ihs-headache.org/en/">https://ihs-headache.org/en/</a>                                                                                 |
| International Longevity Centre UK                 | 1080496  | <a href="https://ilcuk.org.uk/">https://ilcuk.org.uk/</a>                                                                                               |

|                                                                   |          |                                                                                               |
|-------------------------------------------------------------------|----------|-----------------------------------------------------------------------------------------------|
| International Niemann-Pick Disease Alliance                       | 1150256  | <a href="https://www.inpda.org/">https://www.inpda.org/</a>                                   |
| International Patient Organisation for Primary Immunodeficiencies | 1058005  | <a href="https://ipopi.org/">https://ipopi.org/</a>                                           |
| Invisible Cafe                                                    | N/A      | <a href="https://theinvisiblecafe.co.uk/">https://theinvisiblecafe.co.uk/</a>                 |
| Isabel Hospice Limited                                            | 1046826  | <a href="https://www.isabelhospice.org.uk/">https://www.isabelhospice.org.uk/</a>             |
| Jo's Cervical Cancer Trust                                        | 1133542  | <a href="https://www.jostrust.org.uk/">https://www.jostrust.org.uk/</a>                       |
| Juvenile Diabetes Research Foundation                             | 295716   | <a href="https://jdrf.org.uk/">https://jdrf.org.uk/</a>                                       |
| Karen Clifford Skcin cancer charity                               | 1150048  | <a href="https://www.skcin.org/">https://www.skcin.org/</a>                                   |
| Kent Autistic Trust                                               | 801965   | <a href="https://www.kentautistictrust.org/">https://www.kentautistictrust.org/</a>           |
| Kent MS Therapy Centre                                            | 801382   | <a href="https://kentmstc.org.uk/">https://kentmstc.org.uk/</a>                               |
| Kidney Cancer Support Network                                     | 1164238  | <a href="https://actionkidneycancer.org/">https://actionkidneycancer.org/</a>                 |
| Kidney Cancer UK                                                  | 1120146  | <a href="https://www.kcuk.org.uk/">https://www.kcuk.org.uk/</a>                               |
| Kidney Care UK                                                    | 270288   | <a href="https://www.kidneycareuk.org/">https://www.kidneycareuk.org/</a>                     |
| Kidney Research UK                                                | 252892   | <a href="https://www.kidneyresearchuk.org/">https://www.kidneyresearchuk.org/</a>             |
| Leukaemia CARE                                                    | 1183890  | <a href="https://www.leukaemiacare.org.uk/">https://www.leukaemiacare.org.uk/</a>             |
| Leukaemia UK                                                      | 1154856  | <a href="https://www.leukaemiauk.org.uk/">https://www.leukaemiauk.org.uk/</a>                 |
| Liver4Life                                                        | 1152618  | <a href="https://www.liver4life.org.uk/">https://www.liver4life.org.uk/</a>                   |
| Lupus UK                                                          | 1051610  | <a href="https://www.lupusuk.org.uk/">https://www.lupusuk.org.uk/</a>                         |
| Lymphoma Action                                                   | 1068395  | <a href="https://lymphoma-action.org.uk/about-us">https://lymphoma-action.org.uk/about-us</a> |
| Macmillan Cancer Support                                          | 261017   | <a href="https://www.macmillan.org.uk/">https://www.macmillan.org.uk/</a>                     |
| Macular Society                                                   | 2177039  | <a href="https://www.macularsociety.org/">https://www.macularsociety.org/</a>                 |
| Maggie's Centres                                                  | SC024414 | <a href="https://www.maggies.org/">https://www.maggies.org/</a>                               |
| Maypole Project                                                   | 1120163  | <a href="https://www.themaypoleproject.co.uk/">https://www.themaypoleproject.co.uk/</a>       |
| MDS UK Support Group                                              | 1145214  | <a href="https://mdspatientsupport.org.uk/">https://mdspatientsupport.org.uk/</a>             |
| Meath Epilepsy Charity                                            | 200359   | <a href="https://www.meath.org.uk/">https://www.meath.org.uk/</a>                             |
| Medics 4 Rare Diseases                                            | 1183996  | <a href="https://www.m4rd.org/history/">https://www.m4rd.org/history/</a>                     |
| Melanoma Focus                                                    | 1124716  | <a href="https://melanomafocus.org/">https://melanomafocus.org/</a>                           |
| Melanoma Fund                                                     | 1085969  | <a href="https://www.melanoma-fund.co.uk/">https://www.melanoma-fund.co.uk/</a>               |
| Melanoma UK                                                       | 1157635  | <a href="https://www.melanomauk.org.uk/">https://www.melanomauk.org.uk/</a>                   |
| Memorylane Eastbourne                                             | 1163541  | <a href="https://www.memorylaneeastbourne.co.uk/">https://www.memorylaneeastbourne.co.uk/</a> |
| Meningitis Now                                                    | 803016   | <a href="https://www.meningitisnow.org/">https://www.meningitisnow.org/</a>                   |
| Meningitis Research Foundation                                    | 1091105  | <a href="https://www.meningitis.org/">https://www.meningitis.org/</a>                         |
| Menopause Support                                                 | N/A      | <a href="https://menopausesupport.co.uk/">https://menopausesupport.co.uk/</a>                 |
| Mental Health UK                                                  | 1170815  | <a href="https://mentalhealth-uk.org/">https://mentalhealth-uk.org/</a>                       |
| Mersey Region Epilepsy Association                                | 504366   | <a href="https://www.epilepsymersey.org.uk/">https://www.epilepsymersey.org.uk/</a>           |
| Mesothelioma UK                                                   | 1177039  | <a href="https://www.mesothelioma.uk.com/">https://www.mesothelioma.uk.com/</a>               |
| Metabolic Support UK                                              | 1089588  | <a href="https://www.metabolicsupportuk.org/">https://www.metabolicsupportuk.org/</a>         |
| Migraine Trust                                                    | 1081300  | <a href="https://migrainetrust.org/">https://migrainetrust.org/</a>                           |
| Motor Neurone Disease Association                                 | 294354   | <a href="https://www.mndassociation.org/">https://www.mndassociation.org/</a>                 |
| Mouth Cancer Foundation                                           | 1109298  | <a href="https://www.mouthcancerfoundation.org/">https://www.mouthcancerfoundation.org/</a>   |
| MPN Voice                                                         | 1160316  | <a href="https://www.mpnvoice.org.uk/">https://www.mpnvoice.org.uk/</a>                       |

|                                                                     |          |                                                                                                                                                                                                                                                                                               |
|---------------------------------------------------------------------|----------|-----------------------------------------------------------------------------------------------------------------------------------------------------------------------------------------------------------------------------------------------------------------------------------------------|
| Multiple Sclerosis International Federation                         | 1105321  | <a href="https://www.msif.org/">https://www.msif.org/</a>                                                                                                                                                                                                                                     |
| Multiple Sclerosis Society UK                                       | 1139257  | <a href="https://www.mssociety.org.uk/">https://www.mssociety.org.uk/</a>                                                                                                                                                                                                                     |
| Multiple Sclerosis Therapy Centres                                  | 1031690  | <a href="https://www.msntc.org.uk/">https://www.msntc.org.uk/</a>                                                                                                                                                                                                                             |
| Multiple Sclerosis Trust                                            | 1088353  | <a href="https://mstrust.org.uk/">https://mstrust.org.uk/</a>                                                                                                                                                                                                                                 |
| Muscular Dystrophy UK                                               | 205395   | <a href="https://www.musculardystrophyuk.org/">https://www.musculardystrophyuk.org/</a>                                                                                                                                                                                                       |
| My Name'5 Doddie Foundation                                         | SC047871 | <a href="https://www.myname5doddie.co.uk/">https://www.myname5doddie.co.uk/</a>                                                                                                                                                                                                               |
| Myeloma UK                                                          | SC026116 | <a href="https://www.myeloma.org.uk/">https://www.myeloma.org.uk/</a>                                                                                                                                                                                                                         |
| National AIDS Map                                                   | 1011220  | <a href="https://www.aidsmap.com/">https://www.aidsmap.com/</a>                                                                                                                                                                                                                               |
| National AIDS Trust                                                 | 297977   | <a href="https://www.nat.org.uk/">https://www.nat.org.uk/</a>                                                                                                                                                                                                                                 |
| National Attention Deficit Disorder Information and Support Service | N/A      | <a href="https://www.nhs.uk/services/service-directory/the-national-attention-deficit-disorder-information-and-support-service-address/N10498901">https://www.nhs.uk/services/service-directory/the-national-attention-deficit-disorder-information-and-support-service-address/N10498901</a> |
| National Axial Spondyloarthritis Society                            | 1183175  | <a href="https://nass.co.uk/">https://nass.co.uk/</a>                                                                                                                                                                                                                                         |
| National Cancer Research Institute                                  | 1160609  | <a href="https://www.ncri.org.uk/">https://www.ncri.org.uk/</a>                                                                                                                                                                                                                               |
| National Eczema Society                                             | 1009671  | <a href="https://eczema.org/">https://eczema.org/</a>                                                                                                                                                                                                                                         |
| National Federation of Prostate Cancer Support Groups               | 1163152  | <a href="https://tackleprostate.org/">https://tackleprostate.org/</a>                                                                                                                                                                                                                         |
| National Kidney Federation                                          | 1106735  | <a href="https://www.kidney.org.uk/">https://www.kidney.org.uk/</a>                                                                                                                                                                                                                           |
| National Rheumatoid Arthritis Society                               | 1134859  | <a href="https://nras.org.uk/">https://nras.org.uk/</a>                                                                                                                                                                                                                                       |
| National Voices                                                     | 1057711  | <a href="https://www.nationalvoices.org.uk/">https://www.nationalvoices.org.uk/</a>                                                                                                                                                                                                           |
| NAZ                                                                 | 1014056  | <a href="https://www.naz.org.uk/">https://www.naz.org.uk/</a>                                                                                                                                                                                                                                 |
| Neuroendocrine Cancer UK                                            | 1092386  | <a href="https://www.neuroendocrinecancer.org.uk/">https://www.neuroendocrinecancer.org.uk/</a>                                                                                                                                                                                               |
| Neurological Alliance                                               | 1039034  | <a href="https://www.neural.org.uk/">https://www.neural.org.uk/</a>                                                                                                                                                                                                                           |
| New Life Counselling                                                | NI005568 | <a href="https://www.amh.org.uk/">https://www.amh.org.uk/</a>                                                                                                                                                                                                                                 |
| NHS Charities Together                                              | 1186569  | <a href="https://nhscharitiestogether.co.uk/">https://nhscharitiestogether.co.uk/</a>                                                                                                                                                                                                         |
| Nicole & Jessica Rich Foundation                                    | N/A      | <a href="https://thenicolerichfoundation.org.uk/">https://thenicolerichfoundation.org.uk/</a>                                                                                                                                                                                                 |
| Niemann-Pick UK                                                     | 1144406  | <a href="https://www.npuk.org/">https://www.npuk.org/</a>                                                                                                                                                                                                                                     |
| North Bristol NHS Trust                                             | 1055900  | <a href="https://www.nbt.nhs.uk/">https://www.nbt.nhs.uk/</a>                                                                                                                                                                                                                                 |
| Oral Health Foundation                                              | 263198   | <a href="https://www.dentalhealth.org/">https://www.dentalhealth.org/</a>                                                                                                                                                                                                                     |
| Orchid                                                              | 1080540  | <a href="https://orchid-cancer.org.uk/">https://orchid-cancer.org.uk/</a>                                                                                                                                                                                                                     |
| Osteoporosis Dorset                                                 | 1023507  | <a href="https://www.osteodorset.org.uk/">https://www.osteodorset.org.uk/</a>                                                                                                                                                                                                                 |
| Ovacome                                                             | 1159682  | <a href="https://www.ovacome.org.uk/">https://www.ovacome.org.uk/</a>                                                                                                                                                                                                                         |
| Ovarian Cancer Action                                               | 1109743  | <a href="https://ovarian.org.uk/">https://ovarian.org.uk/</a>                                                                                                                                                                                                                                 |
| Over the Wall                                                       | 1075361  | <a href="https://www.otw.org.uk/">https://www.otw.org.uk/</a>                                                                                                                                                                                                                                 |
| Pain Concern                                                        | SC023559 | <a href="https://painconcern.org.uk/">https://painconcern.org.uk/</a>                                                                                                                                                                                                                         |
| Pancreatic Cancer Action                                            | 1137689  | <a href="https://pancreaticcanceraction.org/">https://pancreaticcanceraction.org/</a>                                                                                                                                                                                                         |
| Pancreatic Cancer UK                                                | 1112708  | <a href="https://www.pancreaticcancer.org.uk/">https://www.pancreaticcancer.org.uk/</a>                                                                                                                                                                                                       |
| Parathyroid UK                                                      | N/A      | <a href="https://parathyroiduk.org/">https://parathyroiduk.org/</a>                                                                                                                                                                                                                           |
| Parkinson's UK                                                      | 258197   | <a href="https://www.parkinsons.org.uk/">https://www.parkinsons.org.uk/</a>                                                                                                                                                                                                                   |
| Patient Information Forum                                           | N/A      | <a href="https://pifonline.org.uk/">https://pifonline.org.uk/</a>                                                                                                                                                                                                                             |
| Patients Association                                                | 1006733  | <a href="https://www.patients-association.org.uk/">https://www.patients-association.org.uk/</a>                                                                                                                                                                                               |

|                                                                           |          |                                                                                                                                                     |
|---------------------------------------------------------------------------|----------|-----------------------------------------------------------------------------------------------------------------------------------------------------|
| Patients On Intravenous and Nasogastric Nutrition Therapy                 | 1157655  | <a href="https://pinnt.com/Home.aspx">https://pinnt.com/Home.aspx</a>                                                                               |
| Paula Carr Diabetes Trust                                                 | 801596   | <a href="https://www.paulacarrdiabetestrust.co.uk/">https://www.paulacarrdiabetestrust.co.uk/</a>                                                   |
| PBC Foundation UK                                                         | SC025619 | <a href="https://www.pbcfoundation.org.uk/">https://www.pbcfoundation.org.uk/</a>                                                                   |
| Pilgrims Hospice                                                          | 293968   | <a href="https://www.pilgrimshospices.org/">https://www.pilgrimshospices.org/</a>                                                                   |
| Pituitary Foundation                                                      | 1058968  | <a href="https://www.pituitary.org.uk/">https://www.pituitary.org.uk/</a>                                                                           |
| Platelet Society                                                          | 1172202  | <a href="https://plateletsociety.co.uk/">https://plateletsociety.co.uk/</a>                                                                         |
| Police Community Clubs of Great Britain                                   | N/A      | <a href="https://www.policecommunityclubs.org/">https://www.policecommunityclubs.org/</a>                                                           |
| Polycystic Kidney Disease Charity                                         | 1160970  | <a href="https://pkdcharity.org.uk/">https://pkdcharity.org.uk/</a>                                                                                 |
| Pompe Support Network                                                     | 1186383  | <a href="https://pompe.uk/">https://pompe.uk/</a>                                                                                                   |
| Positively UK                                                             | 1007685  | <a href="https://positivelyuk.org/">https://positivelyuk.org/</a>                                                                                   |
| Primary Immunodeficiency UK                                               | 1193166  | <a href="http://www.immunodeficiencyuk.org/">http://www.immunodeficiencyuk.org/</a>                                                                 |
| Progress Educational Trust                                                | 1139856  | <a href="https://www.progress.org.uk/">https://www.progress.org.uk/</a>                                                                             |
| Progressive Supranuclear Palsy Association                                | 1037087  | <a href="https://pspassociation.org.uk/">https://pspassociation.org.uk/</a>                                                                         |
| Prostate Cancer UK                                                        | 1005541  | <a href="https://prostatecanceruk.org/">https://prostatecanceruk.org/</a>                                                                           |
| Psoriasis Association                                                     | 1180666  | <a href="https://www.psoriasis-association.org.uk/">https://www.psoriasis-association.org.uk/</a>                                                   |
| Pulmonary Hypertension Association UK                                     | 1120756  | <a href="https://www.phauk.org/">https://www.phauk.org/</a>                                                                                         |
| Pumping Marvellous Foundation                                             | 1151848  | <a href="https://www.pumpingmarvellous.org/">https://www.pumpingmarvellous.org/</a>                                                                 |
| Rain Trust                                                                | N/A      | <a href="https://www.nhs.uk/services/service-directory/rain-trust/N10972097">https://www.nhs.uk/services/service-directory/rain-trust/N10972097</a> |
| Rainbow Trust Children's Charity                                          | 1070532  | <a href="https://www.rainbowtrust.org.uk/">https://www.rainbowtrust.org.uk/</a>                                                                     |
| Rapid Effective Assistance For Children With Potentially Terminal Illness | 802440   | <a href="https://reactcharity.org/">https://reactcharity.org/</a>                                                                                   |
| Red Rose Recovery                                                         | 1152474  | <a href="https://redroserecovery.org.uk/">https://redroserecovery.org.uk/</a>                                                                       |
| Release                                                                   | 801118   | <a href="https://www.release.org.uk/">https://www.release.org.uk/</a>                                                                               |
| Rethink Mental Illness                                                    | 271028   | <a href="https://www.rethink.org/">https://www.rethink.org/</a>                                                                                     |
| Retina UK                                                                 | 1153851  | <a href="https://retinauk.org.uk/about/">https://retinauk.org.uk/about/</a>                                                                         |
| Revive Multiple Sclerosis Support                                         | SC022886 | <a href="https://www.revivemssupport.org.uk/">https://www.revivemssupport.org.uk/</a>                                                               |
| Roy Castle Lung Cancer Foundation                                         | 1046854  | <a href="https://roycastle.org/">https://roycastle.org/</a>                                                                                         |
| Royal Free Charity                                                        | 1165672  | <a href="https://royalfreecharity.org/">https://royalfreecharity.org/</a>                                                                           |
| Royal National Institute of Blind People                                  | 226227   | <a href="https://www.rnib.org.uk/">https://www.rnib.org.uk/</a>                                                                                     |
| Royal Osteoporosis Society                                                | 1102712  | <a href="https://theros.org.uk/">https://theros.org.uk/</a>                                                                                         |
| Ruth Strauss Foundation                                                   | 1183221  | <a href="https://ruthstraussfoundation.com/">https://ruthstraussfoundation.com/</a>                                                                 |
| Salivary Gland Cancer UK                                                  | 1182762  | <a href="https://www.salivaryglandcancer.uk/">https://www.salivaryglandcancer.uk/</a>                                                               |
| SANE                                                                      | 296572   | <a href="https://www.sane.org.uk/">https://www.sane.org.uk/</a>                                                                                     |
| Sarcoma UK                                                                | 1139869  | <a href="https://sarcoma.org.uk/">https://sarcoma.org.uk/</a>                                                                                       |
| Scleroderma and Raynauds UK                                               | 1161828  | <a href="https://www.sruk.co.uk/">https://www.sruk.co.uk/</a>                                                                                       |
| Scottish Drugs Forum                                                      | SC008075 | <a href="https://www.sdf.org.uk/">https://www.sdf.org.uk/</a>                                                                                       |



|                                                   |           |                                                                                                                                                                                                                                       |
|---------------------------------------------------|-----------|---------------------------------------------------------------------------------------------------------------------------------------------------------------------------------------------------------------------------------------|
| Scottish Families Affected by Alcohol & Drugs     | N/A       | <a href="https://www.sfad.org.uk/">https://www.sfad.org.uk/</a>                                                                                                                                                                       |
| Scottish Huntington's Association                 | SC010985  | <a href="https://hdscotland.org/">https://hdscotland.org/</a>                                                                                                                                                                         |
| Shift.MS                                          | 1117194   | <a href="https://shift.ms/">https://shift.ms/</a>                                                                                                                                                                                     |
| Shine Cancer Support                              | 1146902   | <a href="https://shinecancersupport.org/">https://shinecancersupport.org/</a>                                                                                                                                                         |
| Sickle Cell Society                               | 1046631   | <a href="https://www.sicklecellsociety.org/">https://www.sicklecellsociety.org/</a>                                                                                                                                                   |
| Skin Conditions Campaign Scotland                 | SC030004  | <a href="https://www.disabilityscot.org.uk/organisation/skin-conditions-campaign-scotland/">https://www.disabilityscot.org.uk/organisation/skin-conditions-campaign-scotland/</a>                                                     |
| Society for Mucopolysaccharide Diseases           | 1143472   | <a href="https://www.mppsociety.org.uk/">https://www.mppsociety.org.uk/</a>                                                                                                                                                           |
| Somerville Foundation                             | 1138088   | <a href="https://sfhearts.org.uk/">https://sfhearts.org.uk/</a>                                                                                                                                                                       |
| Sophia Forum                                      | 1131629   | <a href="https://sophiaforum.net/">https://sophiaforum.net/</a>                                                                                                                                                                       |
| Spinal Muscular Atrophy Support UK                | 1106815   | <a href="https://smauk.org.uk/">https://smauk.org.uk/</a>                                                                                                                                                                             |
| St Elizabeths Centre                              | 1176777   | <a href="https://www.stelizabeths.org.uk/">https://www.stelizabeths.org.uk/</a>                                                                                                                                                       |
| Stroke Association                                | 211015    | <a href="https://www.stroke.org.uk/">https://www.stroke.org.uk/</a>                                                                                                                                                                   |
| Swallows Head and Neck Cancer Charity             | 1149794   | <a href="https://www.theswallows.org.uk/">https://www.theswallows.org.uk/</a>                                                                                                                                                         |
| Target Ovarian Cancer                             | 1125038   | <a href="https://targetovariancancer.org.uk/">https://targetovariancancer.org.uk/</a>                                                                                                                                                 |
| Tenovus Cancer Care                               | 1054015   | <a href="https://www.tenovuscancercare.org.uk/">https://www.tenovuscancercare.org.uk/</a>                                                                                                                                             |
| Terrence Higgins Trust                            | 288527    | <a href="https://www.tht.org.uk/">https://www.tht.org.uk/</a>                                                                                                                                                                         |
| Thrombosis UK                                     | 1090540   | <a href="https://thrombosisuk.org/news/post.php?s=2021-10-11-thrombosis-uk-winner-of-activity-of-the-year-award-2021">https://thrombosisuk.org/news/post.php?s=2021-10-11-thrombosis-uk-winner-of-activity-of-the-year-award-2021</a> |
| Tiny Tickers                                      | 1078114   | <a href="https://www.tinytickers.org/">https://www.tinytickers.org/</a>                                                                                                                                                               |
| Together for Short Lives                          | 1144022   | <a href="https://www.togetherforshortlives.org.uk/">https://www.togetherforshortlives.org.uk/</a>                                                                                                                                     |
| TRACtion Cancer Support                           | SCO048145 | <a href="https://www.tractioncancersupport.org/">https://www.tractioncancersupport.org/</a>                                                                                                                                           |
| Trekstock                                         | 1132421   | <a href="https://www.trekstock.com/">https://www.trekstock.com/</a>                                                                                                                                                                   |
| Trevi                                             | 1075433   | <a href="https://trevi.org.uk/">https://trevi.org.uk/</a>                                                                                                                                                                             |
| Tuberous Sclerosis Association                    | 1039549   | <a href="https://tuberous-sclerosis.org/">https://tuberous-sclerosis.org/</a>                                                                                                                                                         |
| Turner Syndrome Support Society                   | 1080507   | <a href="https://tss.org.uk/">https://tss.org.uk/</a>                                                                                                                                                                                 |
| Twins Trust                                       | 1076478   | <a href="https://twinstrust.org/">https://twinstrust.org/</a>                                                                                                                                                                         |
| UK Breast Cancer Group                            | 1177296   | <a href="https://ukbcg.org/">https://ukbcg.org/</a>                                                                                                                                                                                   |
| UK Lung Cancer Coalition                          | N/A       | <a href="https://www.uklcc.org.uk/">https://www.uklcc.org.uk/</a>                                                                                                                                                                     |
| UK Primary Immune-deficiency Patient Support      | 1148789   | <a href="https://ukpips.org.uk/">https://ukpips.org.uk/</a>                                                                                                                                                                           |
| UK Thalassaemia Society                           | 275107    | <a href="https://ukts.org/">https://ukts.org/</a>                                                                                                                                                                                     |
| University of Newcastle Institute of Neuroscience | N/A       | <a href="https://www.ncl.ac.uk/medical-sciences/research/research-themes/neuroscience/">https://www.ncl.ac.uk/medical-sciences/research/research-themes/neuroscience/</a>                                                             |
| Urology Cancer Research and Education             | 1120887   | <a href="http://www.ucare-oxford.org.uk/">http://www.ucare-oxford.org.uk/</a>                                                                                                                                                         |
| Versus Arthritis                                  | 207711    | <a href="https://www.versusarthritis.org/">https://www.versusarthritis.org/</a>                                                                                                                                                       |
| Waldenstrom's Macroglobulinaemia UK               | 1187121   | <a href="https://wmuk.org.uk/">https://wmuk.org.uk/</a>                                                                                                                                                                               |
| White Chapel Mission                              | 227905    | <a href="https://whitechapel.org.uk/">https://whitechapel.org.uk/</a>                                                                                                                                                                 |
| Working with Cancer                               | 9092152   | <a href="https://workingwithcancer.co.uk/">https://workingwithcancer.co.uk/</a>                                                                                                                                                       |
| Young Epilepsy                                    | 311877    | <a href="https://www.youngepilepsy.org.uk/">https://www.youngepilepsy.org.uk/</a>                                                                                                                                                     |

## Inclusion/exclusion of patient organisations

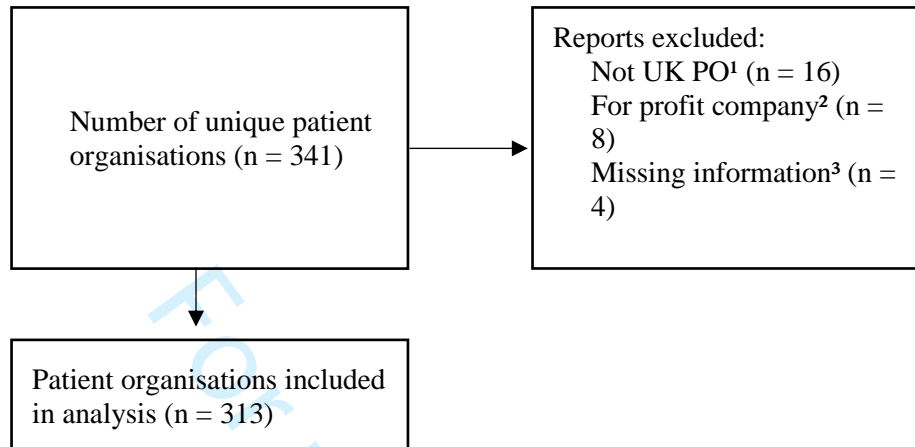

<sup>1</sup>Not aligned with geographical scope e.g. Irish, US-based

<sup>2</sup>Not aligned with EFPIA's definition of patient organisation

<sup>3</sup>Organisations for whose nature is unclear i.e. patient organisation website could not be identified

Additional tables and figures

Figure 2. Histogram of unique companies funding patient organisations in 2020, broken down by rarity of disease

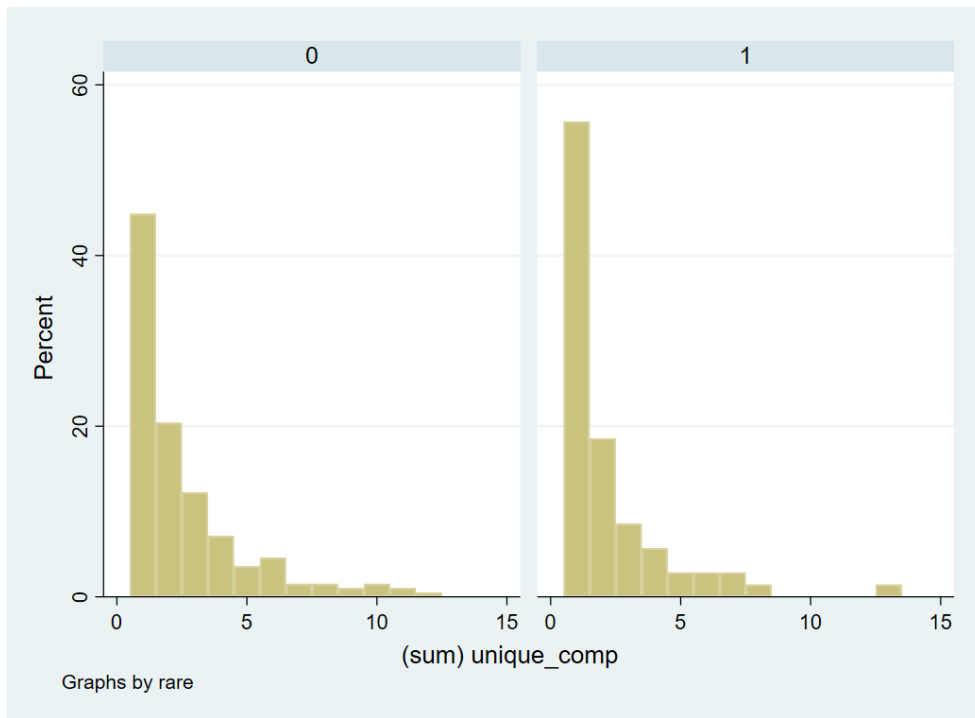

Figure 3. Histogram of share of overall industry funding to patient organisations coming from each contributing company in 2020, broken down by rarity of disease

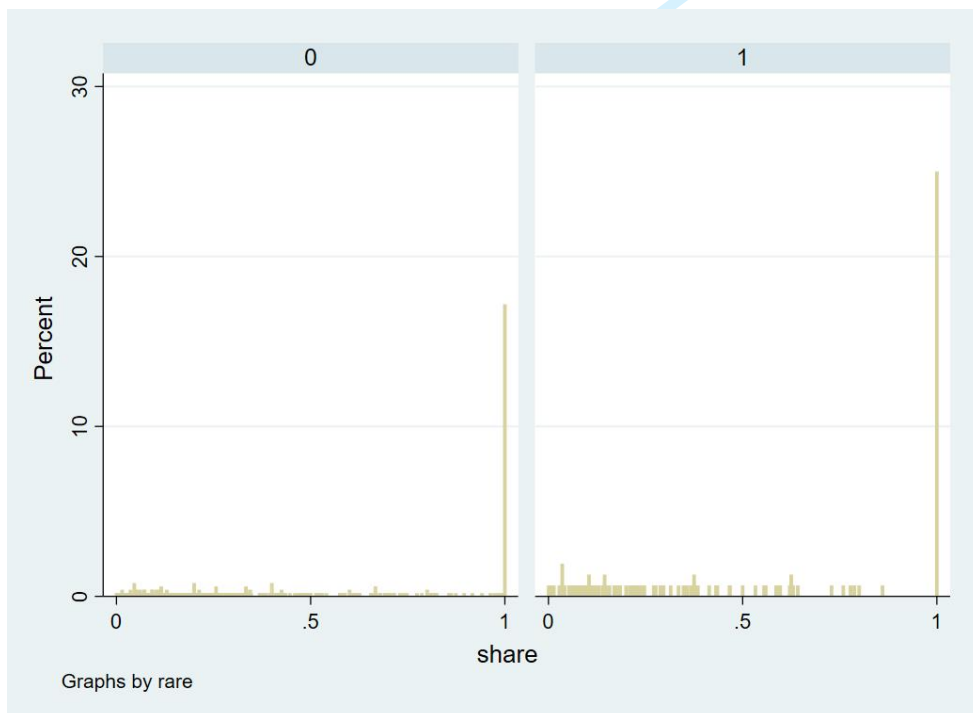

1  
2  
3  
4  
5  
6  
7  
8  
9  
10  
11  
12  
13  
14  
15  
16  
17  
18  
19  
20  
21  
22  
23  
24  
25  
26  
27  
28  
29  
30  
31  
32  
33  
34  
35  
36  
37  
38  
39  
40  
41  
42  
43  
44  
45  
46  
47  
48  
49  
50  
51  
52  
53  
54  
55  
56  
57  
58  
59  
60

**Figure 4. Histogram of share of industry funding of each organisation comprised by the single highest payment in 2020, broken down by rarity of disease**

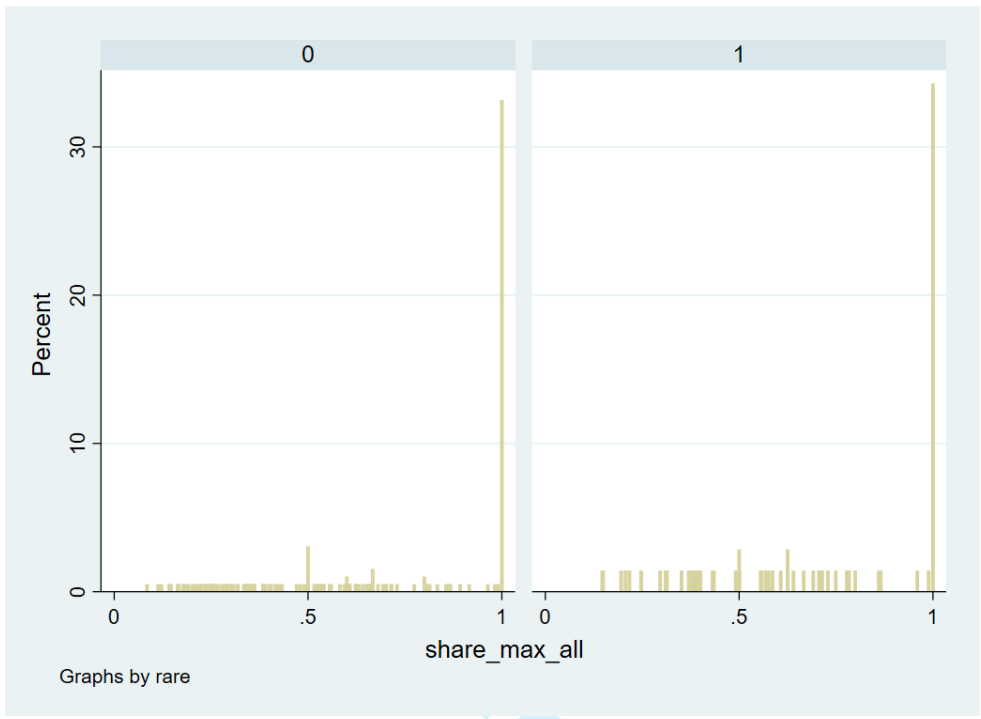

For peer review only

## 1 Sub-group analyses

### 2 Excluded patient organisations

3 66 payments made 28 to patient organisations were excluded from the analysis as they did not  
4 match EFPIA's definition of "*not-for-profit organisations, mainly composed of patients and/or*  
5 *caregivers, that represent and/or support the needs of patients and/or caregivers*".

6 Figure 5 illustrates the reasons for patient organisations exclusion. Most of the excluded patient  
7 organisations were for profit organisations (47%; n=31), followed by not UK-based (42%;  
8 n=28) and organisations for which no information could be found online (11%; n=7).

9 Non-UK patient organisations mostly comprised international alliances of patient  
10 organisations, European or Irish organisations. We classified organisations as for-profit if they  
11 appeared in the UK government repository of companies<sup>1</sup> as *private limited companies*. Care  
12 homes, consultancies and rehabilitation clinics were the most prominent in this category.

13 Overall, payments to excluded patient organisations amounted to £869,677, about 4% of the  
14 included payments (Figure 6).

15 **Figure 5. Excluded patient organisations by reason of exclusion**

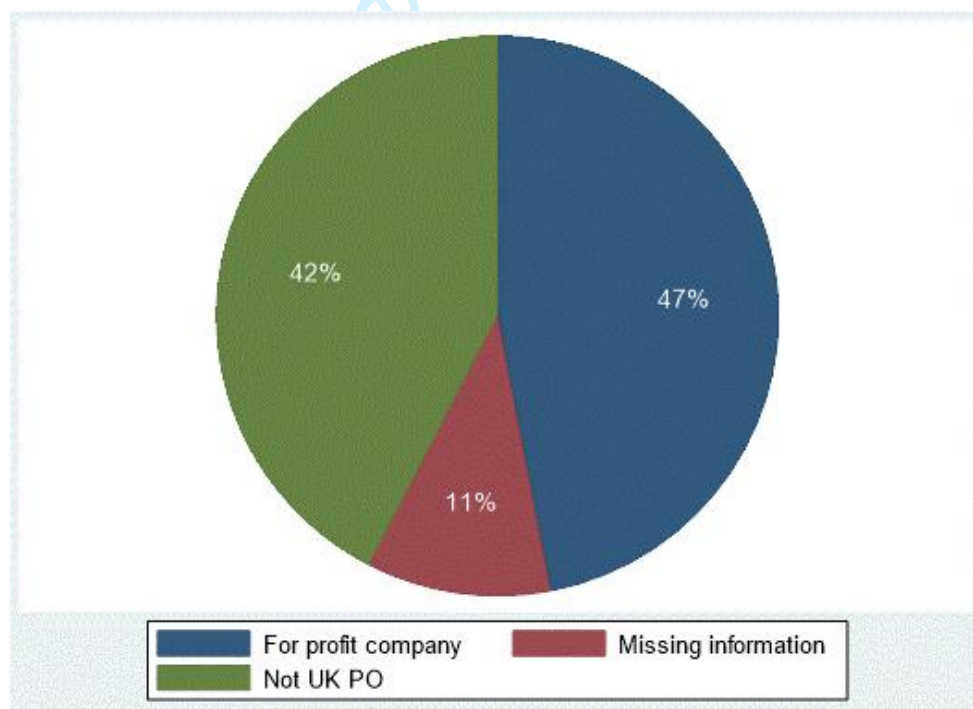

16

<sup>1</sup> <https://find-and-update.company-information.service.gov.uk/>

1  
2  
3  
4  
5  
6  
7  
8  
9  
10  
11  
12  
13  
14  
15  
16  
17  
18  
19  
20  
21  
22  
23  
24  
25  
26  
27  
28  
29  
30  
31  
32  
33  
34  
35  
36  
37  
38  
39  
40  
41  
42  
43  
44  
45  
46  
47  
48  
49  
50  
51  
52  
53  
54  
55  
56  
57  
58  
59  
60

1 **Figure 6. Payments to included and excluded patient organisations**

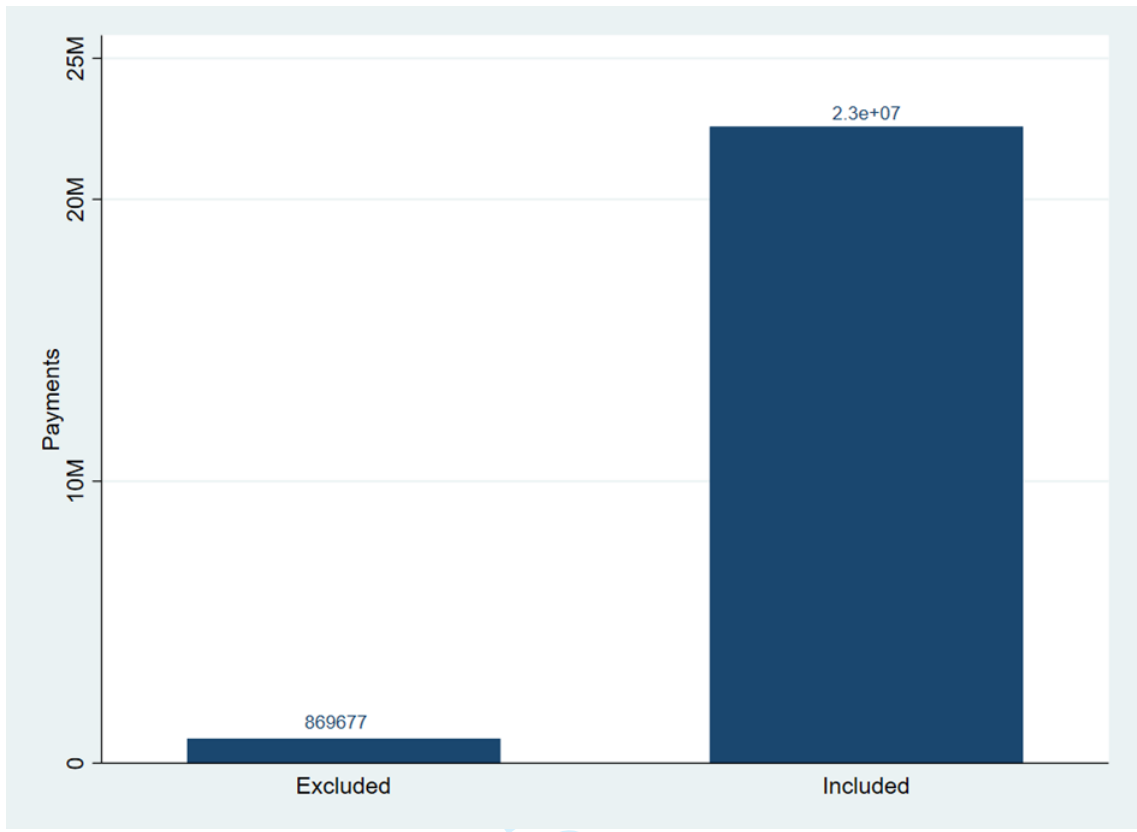

2  
3

Review only

## References

1. PMCPA. ABPI Code of Practice 2021 [Available from: <https://www.pmcpa.org.uk/the-code/2021-interactive-abpi-code-of-practice/>].
2. Rickard E, Carmel E, Ozieranski P. Comparing pharmaceutical company payments in the four UK countries: a cross-sectional and social network analysis. *BMJ Open* 2023;13(3):e061591. doi: 10.1136/bmjopen-2022-061591
3. Ozieranski P, Rickard E, Mulinari, Shai. Exposing drug industry funding of UK patient organisations. *BMJ* 2019;365:11806. doi: 10.1136/bmj.11806
4. HMRC. HMRC yearly average and spot rates: HM Revenue and Customs; [Available from: <https://www.gov.uk/government/publications/exchange-rates-for-customs-and-vat-yearly>].
5. HMRC. HMRC yearly average and spot rates: HM Revenue and Customs; 2022 [Available from: <https://www.gov.uk/government/publications/exchange-rates-for-customs-and-vat-yearly>].
6. Orphanet. The portal for rare diseases and orphan drugs 2022 [Available from: [https://www.orpha.net/consor/cgi-bin/Disease\\_Search\\_Simple.php?lng=EN](https://www.orpha.net/consor/cgi-bin/Disease_Search_Simple.php?lng=EN)].
7. NICE. Policy on declaring and managing interests for NICE advisory committees, 2018.
8. WHO. ICD-11 for Mortality and Morbidity Statistics 2022 [Available from: <https://icd.who.int/browse11/1-m/en#/http://id.who.int/icd/entity/465177735?view=G0>].

## CHEERS 2022 Checklist

| Topic                                | No. | Item                                                                                                                            | Location where item is reported |
|--------------------------------------|-----|---------------------------------------------------------------------------------------------------------------------------------|---------------------------------|
| <b>Title</b>                         |     |                                                                                                                                 |                                 |
|                                      | 1   | Identify the study as an economic evaluation and specify the interventions being compared.                                      | p. 1, lines 1-3                 |
| <b>Abstract</b>                      |     |                                                                                                                                 |                                 |
|                                      | 2   | Provide a structured summary that highlights context, key methods, results, and alternative analyses.                           | p. 2, lines 4-33                |
| <b>Introduction</b>                  |     |                                                                                                                                 |                                 |
| <b>Background and objectives</b>     | 3   | Give the context for the study, the study question, and its practical relevance for decision making in policy or practice.      | p. 4, 5, 6 (all lines)          |
| <b>Methods</b>                       |     |                                                                                                                                 |                                 |
| <b>Health economic analysis plan</b> | 4   | Indicate whether a health economic analysis plan was developed and where available.                                             | N/A                             |
| <b>Study population</b>              | 5   | Describe characteristics of the study population (such as age range, demographics, socioeconomic, or clinical characteristics). | p. 7, lines 3-4                 |
| <b>Setting and location</b>          | 6   | Provide relevant contextual information that may influence findings.                                                            | p. 7, line 4                    |
| <b>Comparators</b>                   | 7   | Describe the interventions or strategies being compared and why chosen.                                                         | N/A                             |
| <b>Perspective</b>                   | 8   | State the perspective(s) adopted by the study and why chosen.                                                                   | p. 7, line 4                    |
| <b>Time horizon</b>                  | 9   | State the time horizon for the study and why appropriate.                                                                       | p. 7, line 4                    |
| <b>Discount rate</b>                 | 10  | Report the discount rate(s) and reason chosen.                                                                                  | N/A                             |
| <b>Selection of outcomes</b>         | 11  | Describe what outcomes were used as the measure(s) of benefit(s) and harm(s).                                                   | p. 7, 8, 9 (all lines)          |
| <b>Measurement of outcomes</b>       | 12  | Describe how outcomes used to capture benefit(s) and harm(s) were measured.                                                     | p. 7, 8, 9 (all lines)          |



| Topic                                                                        | No. | Item                                                                                                                                                                          | Location where item is reported   |
|------------------------------------------------------------------------------|-----|-------------------------------------------------------------------------------------------------------------------------------------------------------------------------------|-----------------------------------|
| <b>Valuation of outcomes</b>                                                 | 13  | Describe the population and methods used to measure and value outcomes.                                                                                                       | p. 9, lines 12-15                 |
| <b>Measurement and valuation of resources and costs</b>                      | 14  | Describe how costs were valued.                                                                                                                                               | N/A                               |
| <b>Currency, price date, and conversion</b>                                  | 15  | Report the dates of the estimated resource quantities and unit costs, plus the currency and year of conversion.                                                               | p. 7, lines 30-34                 |
| <b>Rationale and description of model</b>                                    | 16  | If modelling is used, describe in detail and why used. Report if the model is publicly available and where it can be accessed.                                                | p. 8, lines 17-28                 |
| <b>Analytics and assumptions</b>                                             | 17  | Describe any methods for analysing or statistically transforming data, any extrapolation methods, and approaches for validating any model used.                               | p. 9, lines 27-31                 |
| <b>Characterising heterogeneity</b>                                          | 18  | Describe any methods used for estimating how the results of the study vary for subgroups.                                                                                     | N/A                               |
| <b>Characterising distributional effects</b>                                 | 19  | Describe how impacts are distributed across different individuals or adjustments made to reflect priority populations.                                                        | N/A                               |
| <b>Characterising uncertainty</b>                                            | 20  | Describe methods to characterise any sources of uncertainty in the analysis.                                                                                                  | N/A                               |
| <b>Approach to engagement with patients and others affected by the study</b> | 21  | Describe any approaches to engage patients or service recipients, the general public, communities, or stakeholders (such as clinicians or payers) in the design of the study. | p. 9, lines 32-35                 |
| <b>Results</b>                                                               |     |                                                                                                                                                                               |                                   |
| <b>Study parameters</b>                                                      | 22  | Report all analytic inputs (such as values, ranges, references) including uncertainty or distributional assumptions.                                                          | N/A                               |
| <b>Summary of main results</b>                                               | 23  | Report the mean values for the main categories of costs and outcomes of interest and summarise them in the most appropriate overall measure.                                  | p. 10, 11, 12, 13, 14 (all lines) |
| <b>Effect of uncertainty</b>                                                 | 24  | Describe how uncertainty about analytic judgments, inputs, or projections affect findings. Report the effect of choice of discount rate and time horizon, if applicable.      | N/A                               |

| Topic                                                                       | No. | Item                                                                                                                                                    | Location where item is reported |
|-----------------------------------------------------------------------------|-----|---------------------------------------------------------------------------------------------------------------------------------------------------------|---------------------------------|
| <b>Effect of engagement with patients and others affected by the study</b>  | 25  | Report on any difference patient/service recipient, general public, community, or stakeholder involvement made to the approach or findings of the study | p. 9, lines 32-35               |
| <b>Discussion</b>                                                           |     |                                                                                                                                                         |                                 |
| <b>Study findings, limitations, generalisability, and current knowledge</b> | 26  | Report key findings, limitations, ethical or equity considerations not captured, and how these could affect patients, policy, or practice.              | p. 15-17 (all lines)            |
| <b>Other relevant information</b>                                           |     |                                                                                                                                                         |                                 |
| <b>Source of funding</b>                                                    | 27  | Describe how the study was funded and any role of the funder in the identification, design, conduct, and reporting of the analysis                      | p. 18, lines 11-15              |
| <b>Conflicts of interest</b>                                                | 28  | Report authors conflicts of interest according to journal or International Committee of Medical Journal Editors requirements.                           | p. 18, lines 16-20              |

From: Husereau D, Drummond M, Augustovski F, et al. Consolidated Health Economic Evaluation Reporting Standards 2022 (CHEERS 2022) Explanation and Elaboration: A Report of the ISPOR CHEERS II Good Practices Task Force. Value Health 2022;25.  
[doi:10.1016/j.jval.2021.10.008](https://doi.org/10.1016/j.jval.2021.10.008)
